# Supplementary material for: Using Natural Selection to Explore the Adaptive Potential of Chlamydomonas reinhardtii
Source: PubMed Central journal article supplement (PMC3962425; doi:10.1371/journal.pone.0092533), 2014-03-21
Supplement: pone.0092533.s001.pdf [file pone.0092533.s001.pdf]

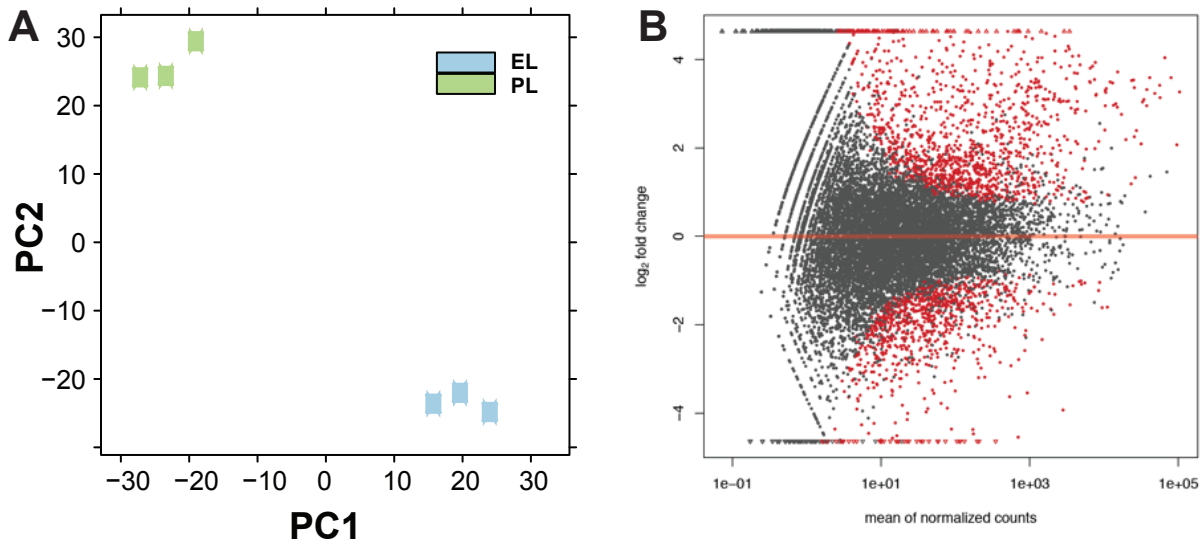

**Figure S1.** Analysis of *C. reinhardtii* mRNA-seq data. (A) Principal components analysis of gene expression for the triplicate mRNA-seq experiments done with the PL and EL populations of *C. reinhardtii*. These results demonstrate that the transcriptome data derived from both sets of triplicate cultures provided a consistent signal of gene expression. (B) Expression differences using mRNA-seq data from the PL-EL comparison. The Log<sub>2</sub> fold changes for points shown in red are significantly different ( $p$ -value < 0.05 with FDR correction) from the mean of normalized counts in that experiment.
