# Supplementary material for: Using Natural Selection to Explore the Adaptive Potential of Chlamydomonas reinhardtii
Source: PubMed Central journal article supplement (PMC3962425; doi:10.1371/journal.pone.0092533), 2014-03-21
Supplement: pone.0092533.s002.pdf [file pone.0092533.s002.pdf]

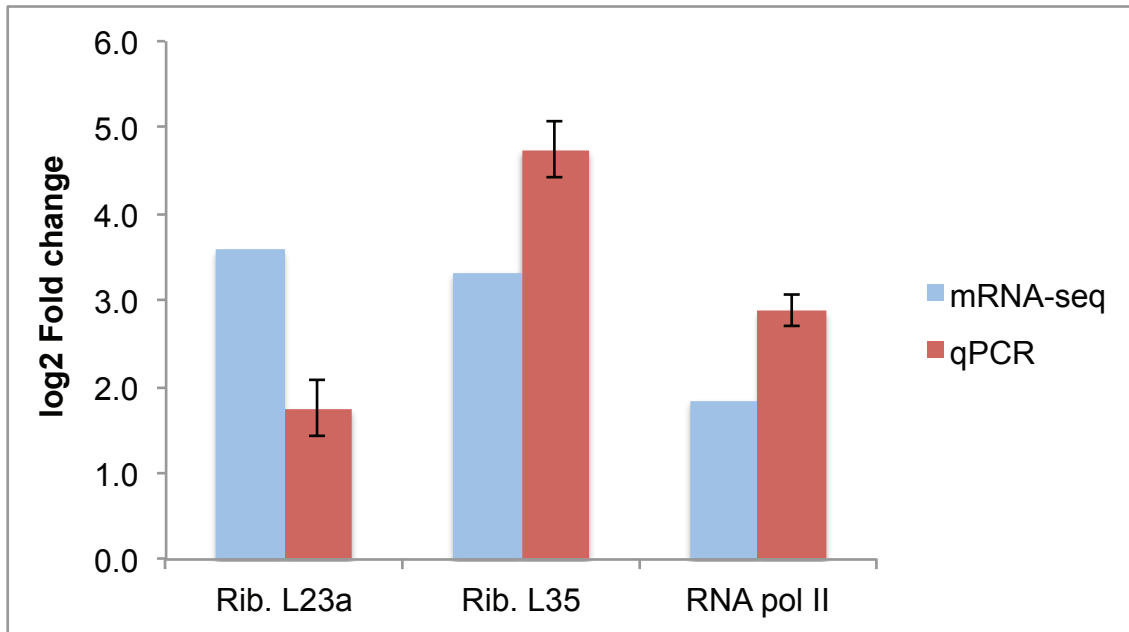

**Figure S2.** Results of qPCR analysis of three genes that were expressed in the PL and EL populations. Mitochondrial cytochrome c oxidase (COX12) was used as the control in this experiment. The error bars for the qPCR analysis represent the error associated with biological triplicate measurements using RNA from the PL-EL populations. The gene names are as follows: ribosomal protein L23a, ribosomal protein L35, and DNA-directed RNA polymerase II.
