# Supplementary material for: Using Natural Selection to Explore the Adaptive Potential of Chlamydomonas reinhardtii
Source: PubMed Central journal article supplement (PMC3962425; doi:10.1371/journal.pone.0092533), 2014-03-21
Supplement: pone.0092533.s005.pdf [file pone.0092533.s005.pdf]

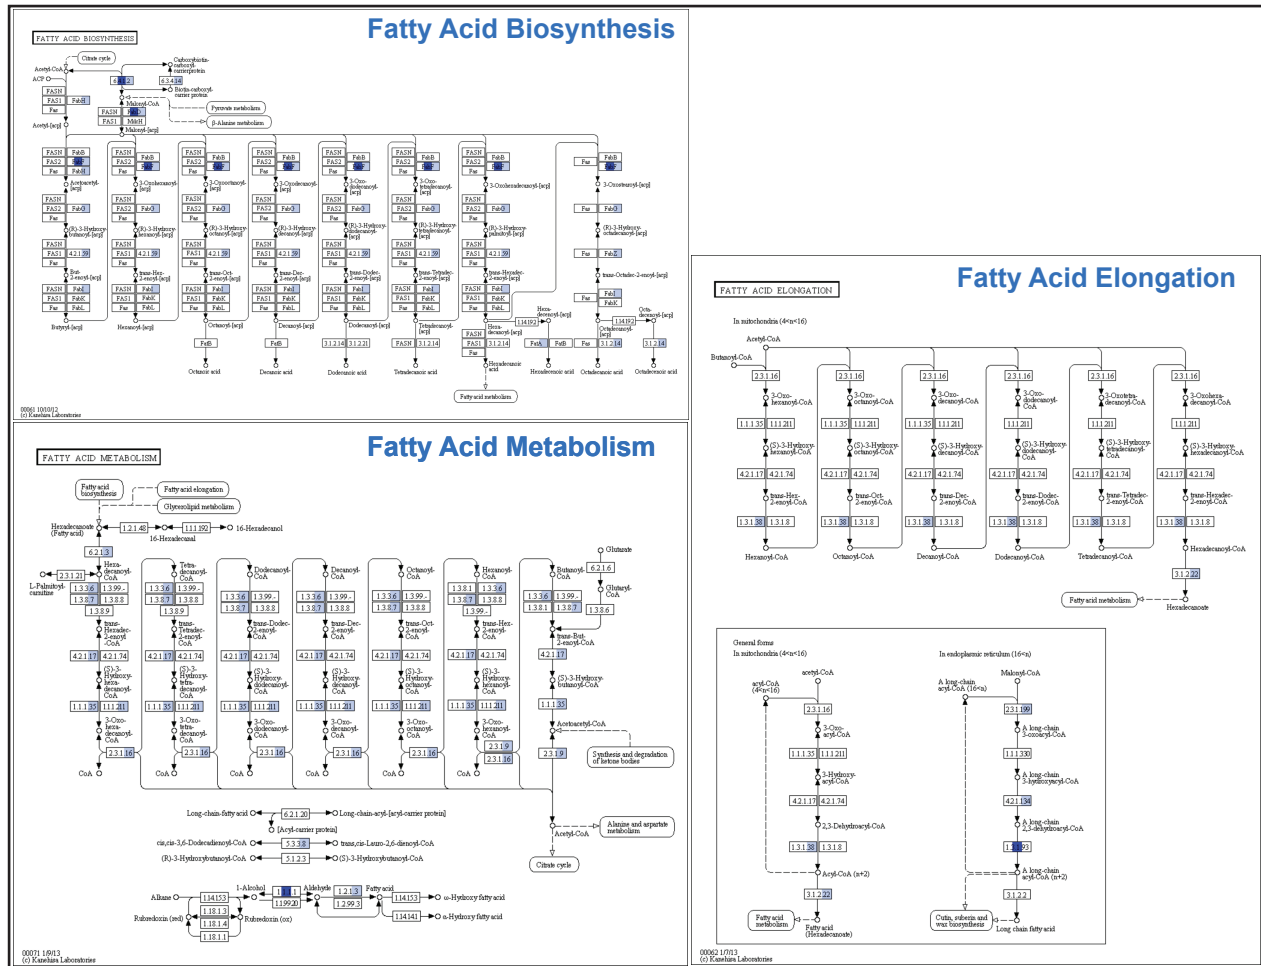

**Figure S5.** KEGG pathway analysis of genes that are significantly up- or down-regulated in the pathways of fatty acid biosynthesis, metabolism, and elongation in the PL-EL comparison. In this figure, the background non-differentially expressed proteins are shown in the light blue boxes, whereas genes that are down-regulated are shown in the dark blue boxes.
