# Supplementary material for: Using Natural Selection to Explore the Adaptive Potential of Chlamydomonas reinhardtii
Source: PLoS One. 2014 Mar 21;9(3):e92533. doi: 10.1371/journal.pone.0092533 (PMC3962425; doi:10.1371/journal.pone.0092533)
Supplement: Table S3 — Distribution of single nucleotide polymorphisms (SNPs) and insertions-deletions (indels) in the comparison of DNA sequenced from the EL and PL populations and analysis of mutation rates in the EL cells. (XLSX) [file pone.0092533.s008.xlsx]

## Sheet: All - 1937
Table S3. Distribution of single polymorphisms (SNPs) and insertion-deletions (indels) in the comparison of DNA sequenced from the EL and PL populations.
Mapping	Reference Position	Type	Length	Reference	Allele	Count	Coverage	Frequency	Forward/reverse balance	Average quality	Overlapping annotations	Coding region change	Amino acid change
chr12	4109309	SNV	1	T	C	23	23	100	0.347826	37.3913	CDS: g12772, Gene: g12772, mRNA: g12772	g12772:c.376A>G	g12772:p.Thr126Ala
chr15	293958	SNV	1	T	C	23	23	100	0.347826	35.6304	Gene: Cre15.g635650, Gene: g15333, mRNA: Cre15.g635650, mRNA: g15333	Cre15.g635650:c.[4236+83T>C]; g15333:c.[4236+83T>C]
chr15	293960	SNV	1	T	C	23	23	100	0.347826	35.6304	Gene: Cre15.g635650, Gene: g15333, mRNA: Cre15.g635650, mRNA: g15333	Cre15.g635650:c.[4236+85T>C]; g15333:c.[4236+85T>C]
chr15	293966	SNV	1	G	C	26	26	100	0.172414	35.7241	Gene: Cre15.g635650, Gene: g15333, mRNA: Cre15.g635650, mRNA: g15333	Cre15.g635650:c.[4236+91G>C]; g15333:c.[4236+91G>C]
chr15	293995	SNV	1	G	T	22	22	100	0.16	36.84	Gene: Cre15.g635650, Gene: g15333, mRNA: Cre15.g635650, mRNA: g15333	Cre15.g635650:c.[4236+120G>T]; g15333:c.[4236+120G>T]
chr15	293998	SNV	1	G	T	21	21	100	0	37.1905	Gene: Cre15.g635650, Gene: g15333, mRNA: Cre15.g635650, mRNA: g15333	Cre15.g635650:c.[4236+123G>T]; g15333:c.[4236+123G>T]
chr17	4472200	SNV	1	G	A	97	97	100	0.323232	35.7475	Gene: g17698, Gene: Cre17.g732350, mRNA: g17698, mRNA: Cre17.g732350, Three_prime_utr: PAC:26896496.three_prime_UTR.1, Three_prime_utr: PAC:26896497.three_prime_UTR.1
chr2	2233023	SNV	1	A	C	23	23	100	0.37037	36.0741	Gene: Cre02.g090000, mRNA: Cre02.g090000	Cre02.g090000:c.517-50A>C
chr2	7212684	SNV	1	T	C	22	22	100	0.391304	36.1304	CDS: g2539, Gene: g2539, mRNA: g2539	g2539:c.1319A>G	g2539:p.Asp440Gly
chr3	4949578	SNV	1	G	A	24	24	100	0.48	37.16	Gene: g3728, mRNA: g3728	g3728:c.471-56G>A
chr3	4949595	SNV	1	G	A	26	26	100	0.481481	37.7407	Gene: g3728, mRNA: g3728	g3728:c.471-39G>A
chr3	8352134	Insertion	1	-	T	22	22	100	0.5	34.5909	Gene: Cre03.g198800, Five_prime_utr: PAC:26902141.five_prime_UTR.2, mRNA: Cre03.g198800
chr3	8352136	Insertion	1	-	C	21	21	100	0.47619	36.381	Gene: Cre03.g198800, Five_prime_utr: PAC:26902141.five_prime_UTR.2, mRNA: Cre03.g198800
chr3	1880905	SNV	1	G	A	20	20	100	0.3	37	CDS: Cre03.g154950, Gene: Cre03.g154950, mRNA: Cre03.g154950	Cre03.g154950:c.148G>A	Cre03.g154950:p.Glu50Met
chr3	1880906	SNV	1	A	T	20	20	100	0.3	37	CDS: Cre03.g154950, Gene: Cre03.g154950, mRNA: Cre03.g154950	Cre03.g154950:c.149A>T	Cre03.g154950:p.Glu50Met
chr4	1963422	SNV	1	A	G	104	104	100	0.428571	35.9107	Gene: Cre04.g218500, mRNA: Cre04.g218500	Cre04.g218500:c.1275+641T>C
chr4	1963440	SNV	1	T	C	101	101	100	0.40367	36.1835	Gene: Cre04.g218500, mRNA: Cre04.g218500	Cre04.g218500:c.1275+623A>G
chr4	1963462	Deletion	5	CGTAC	-	66	66	100	0.30303	34.1212	Gene: Cre04.g218500, mRNA: Cre04.g218500	Cre04.g218500:c.1275+597_1275+601delGTACG
chr4	1734574	SNV	1	T	G	20	20	100	0.291667	35.9583	Gene: Cre04.g212400, mRNA: Cre04.g212400	Cre04.g212400:c.2629-48A>C
chr4	3534151	SNV	1	A	G	21	21	100	0.227273	36.1818	CDS: g4993, CDS: Cre04.g228208, Gene: Cre04.g228208, Gene: g4993, mRNA: Cre04.g228208, mRNA: g4993	g4993:c.[1259T>C]; Cre04.g228208:c.[1244T>C]	g4993:p.[Phe420Ser]; Cre04.g228208:p.[Phe415Ser]
chr5	563891	SNV	1	T	A	46	46	100	0.333333	36.1667	Gene: Cre05.g232300, mRNA: Cre05.g232300	Cre05.g232300:c.4285-164A>T
chr5	563900	SNV	1	G	C	44	44	100	0.318182	36.0114	Gene: Cre05.g232300, mRNA: Cre05.g232300	Cre05.g232300:c.4285-173C>G
chr5	563901	SNV	1	A	G	44	44	100	0.318182	36.0114	Gene: Cre05.g232300, mRNA: Cre05.g232300	Cre05.g232300:c.4285-174T>C
chr5	563919	SNV	1	G	C	30	30	100	0.419355	35.3226	Gene: Cre05.g232300, mRNA: Cre05.g232300	Cre05.g232300:c.4285-192C>G
chr5	563924	SNV	1	T	G	31	31	100	0.375	36.2188	Gene: Cre05.g232300, mRNA: Cre05.g232300	Cre05.g232300:c.4285-197A>C
chr6	989227	SNV	1	C	T	21	21	100	0.416667	35.3333
chr7	3577775	SNV	1	T	C	27	27	100	0.46875	36.0938	Gene: Cre07.g336600, Gene: g7833, mRNA: Cre07.g336600, mRNA: g7833	Cre07.g336600:c.[2312-39A>G]; g7833:c.[2312-39A>G]
chr7	3577785	SNV	1	G	C	23	23	100	0.464286	36.3571	Gene: Cre07.g336600, Gene: g7833, mRNA: Cre07.g336600, mRNA: g7833	Cre07.g336600:c.[2312-49C>G]; g7833:c.[2312-49C>G]
chr7	3577791	SNV	1	G	C	20	20	100	0.461538	35.4615	Gene: Cre07.g336600, Gene: g7833, mRNA: Cre07.g336600, mRNA: g7833	Cre07.g336600:c.[2312-55C>G]; g7833:c.[2312-55C>G]
chr7	3577794	SNV	1	T	C	21	21	100	0.5	34.5769	Gene: Cre07.g336600, Gene: g7833, mRNA: Cre07.g336600, mRNA: g7833	Cre07.g336600:c.[2312-58A>G]; g7833:c.[2312-58A>G]
chr7	814167	SNV	1	T	C	22	22	100	0.363636	35.5455	CDS: Cre07.g318300, Gene: Cre07.g318300, mRNA: Cre07.g318300	Cre07.g318300:c.450A>G
chr8	91791	SNV	1	A	G	49	49	100	0.313725	35.451	Gene: g8346, mRNA: g8346, Three_prime_utr: PAC:26888193.three_prime_UTR.1
scaffold_52	6107	SNV	1	G	C	20	20	100	0.26087	35.5217
chr5	458201	SNV	1	C	T	130	131	99.2366	0.215385	34.0308	Gene: g5124, mRNA: g5124, mRNA: g5124	g5124:c.[1282-110C>T];[1303-110C>T]
chr5	1813179	Deletion	2	TA	-	56	57	98.2456	0.482143	32.6071	Gene: Cre05.g242150, Five_prime_utr: PAC:26897766.five_prime_UTR.1, mRNA: Cre05.g242150
chr5	1813176	SNV	1	G	T	52	53	98.1132	0.481481	36.4815	Gene: Cre05.g242150, Five_prime_utr: PAC:26897766.five_prime_UTR.1, mRNA: Cre05.g242150
chr5	458228	SNV	1	C	A	50	51	98.0392	0.4	33.12	Gene: g5124, mRNA: g5124, mRNA: g5124	g5124:c.[1282-83C>A];[1303-83C>A]
chr11	2444238	SNV	1	G	T	46	47	97.8723	0.34	35.96	CDS: Cre11.g475350, Gene: Cre11.g475350, mRNA: Cre11.g475350	Cre11.g475350:c.72G>T	Cre11.g475350:p.Lys24Asn
chr10	2391336	SNV	1	C	G	35	36	97.2222	0.228571	35.7429	Gene: Cre10.g435300, Gene: g10736, mRNA: Cre10.g435300, mRNA: g10736	Cre10.g435300:c.[758+117C>G]; g10736:c.[758+117C>G]
chr3	8352128	Deletion	1	C	-	23	24	95.8333	0.434783	29.5652	Gene: Cre03.g198800, Five_prime_utr: PAC:26902141.five_prime_UTR.2, mRNA: Cre03.g198800
chr5	458187	Deletion	1	A	-	80	84	95.2381	0.4	29.8375	Gene: g5124, mRNA: g5124, mRNA: g5124	g5124:c.[1282-124delA];[1303-124delA]
chr4	3864785	Deletion	1	G	-	19	20	95	0.315789	28.3158	Gene: g5040, mRNA: g5040	g5040:c.283+34delG
chr1	6066544	SNV	1	A	C	665	710	93.662	0.0644678	32.2969	Gene: Cre01.g043200, mRNA: Cre01.g043200	Cre01.g043200:c.207-195T>G
chr1	6066551	SNV	1	T	G	749	801	93.5081	0.0466045	32.6152	Gene: Cre01.g043200, mRNA: Cre01.g043200	Cre01.g043200:c.207-202A>C
chr4	530837	Insertion	1	-	G	24	26	92.3077	0.125	34.875	Gene: g4566, mRNA: g4566	g4566:c.5631-191_5631-190insG
chr6	989231	Deletion	1	G	-	21	23	91.3043	0.380952	31.6667
chr10	2825811	SNV	1	C	T	357	401	89.0274	0.047619	34.8207
chr7	4593015	SNV	1	G	A	95	110	86.3636	0.231579	34.4421	Gene: Cre07.g344100, Gene: g8005, mRNA: Cre07.g344100, mRNA: g8005, mRNA: g8005	Cre07.g344100:c.[4377+126C>T]; g8005:c.[4380+126C>T];[4455+126C>T]
chr4	3660915	SNV	1	C	T	25	29	86.2069	0.24	36.36	CDS: Cre04.g228850, Gene: Cre04.g228850, mRNA: Cre04.g228850	Cre04.g228850:c.1743C>T
chr8	2301674	Insertion	2	-	CA	30	35	85.7143	0.0666667	36.3167	Gene: Cre08.g370250, Gene: g8677, mRNA: Cre08.g370250, mRNA: g8677	Cre08.g370250:c.[152+31_152+32insTG]; g8677:c.[152+31_152+32insTG]
chr4	3660891	SNV	1	A	C	23	27	85.1852	0.217391	35.7391	CDS: Cre04.g228850, Gene: Cre04.g228850, mRNA: Cre04.g228850	Cre04.g228850:c.1719A>C
chr4	2334315	SNV	1	T	C	19	23	82.6087	0.421053	35.5263	CDS: Cre04.g220750, Gene: Cre04.g220750, mRNA: Cre04.g220750	Cre04.g220750:c.558A>G
chr4	3660923	SNV	1	T	C	22	27	81.4815	0.272727	36.2727	CDS: Cre04.g228850, Gene: Cre04.g228850, mRNA: Cre04.g228850	Cre04.g228850:c.1751T>C	Cre04.g228850:p.Val584Ala
chr16	5701841	Insertion	1	-	A	17	21	80.9524	0.411765	33.8824
chr8	3253419	Deletion	1	C	-	17	21	80.9524	0.176471	35.9412	Gene: g8806, mRNA: g8806, mRNA: g8806	g8806:c.[8524-70delC];[8524-70delC]
chr11	92380	SNV	1	G	A	20	25	80	0.409091	37.5455
chr4	3660942	SNV	1	C	T	20	25	80	0.3	36.35	CDS: Cre04.g228850, Gene: Cre04.g228850, mRNA: Cre04.g228850	Cre04.g228850:c.1770C>T
chr6	8766168	Insertion	1	-	A	42	53	79.2453	0.357143	37.0238	Gene: Cre06.g309950, mRNA: Cre06.g309950	Cre06.g309950:c.13419-23_13419-22insT
chr4	355042	SNV	1	T	C	18	23	78.2609	0.263158	37.2105	Gene: g4542, mRNA: g4542	g4542:c.819-440A>G
chr13	673929	Deletion	6	ATGTTG	-	24	31	77.4194	0.125	36.6667	Gene: g13935, mRNA: g13935	g13935:c.1627-44_1627-39delATGTTG
chr9	7776271	SNV	1	G	A	19	25	76	0	35.9474
chr6	2220900	SNV	1	A	C	31	41	75.6098	0.0625	36.9062	Gene: g5977, mRNA: g5977
chr1	329188	SNV	1	A	T	24	32	75	0.416667	34.125
chr4	3618428	Insertion	1	-	G	15	20	75	0.133333	35.8667	Gene: Cre04.g228650, mRNA: Cre04.g228650	Cre04.g228650:c.4063-8_4063-7insC
chr4	2334302	SNV	1	T	C	18	24	75	0.333333	36.9444	CDS: Cre04.g220750, Gene: Cre04.g220750, mRNA: Cre04.g220750	Cre04.g220750:c.571A>G	Cre04.g220750:p.Met191Val
chr4	2334347	SNV	1	T	C	16	22	72.7273	0.235294	35.7647	CDS: Cre04.g220750, Gene: Cre04.g220750, mRNA: Cre04.g220750	Cre04.g220750:c.526A>G	Cre04.g220750:p.Thr176Ala
chr2	25491	SNV	1	A	G	118	165	71.5152	0.372881	34.4492
chr14	1682443	Insertion	1	-	T	15	21	71.4286	0	37.9333	Gene: g14924, mRNA: g14924	g14924:c.396-404_396-403insA
chr16	5588569	Insertion	8	-	ACAGCTAG	20	28	71.4286	0.4	36.6625
chr6	5306397	Deletion	1	C	-	29	41	70.7317	0.413793	23.6207	Gene: Cre06.g283000, mRNA: Cre06.g283000	Cre06.g283000:c.1417-47delC
chr11	339678	Insertion	8	-	CCGCCGGG	21	30	70	0.47619	37.6964
chr11	3752581	Deletion	1	C	-	81	117	69.2308	0.345679	31.9877
chr11	92376	SNV	1	C	T	20	29	68.9655	0.5	37.125
chr11	1642432	Insertion	8	-	AATTGACT	35	51	68.6275	0.371429	36.6571	Gene: g11700, Five_prime_utr: PAC:26890557.five_prime_UTR.1, mRNA: g11700
chr4	3618435	Insertion	1	-	G	17	25	68	0.235294	36.1765	Gene: Cre04.g228650, mRNA: Cre04.g228650	Cre04.g228650:c.4063-15_4063-14insC
chr9	6844023	SNV	1	C	T	23	34	67.6471	0.391304	32.4783	Gene: Cre09.g409800, mRNA: Cre09.g409800	Cre09.g409800:c.942+65G>A
chr4	705172	SNV	1	A	G	99	147	67.3469	0.363636	35.1919	Gene: g4585, mRNA: g4585, Three_prime_utr: PAC:26906169.three_prime_UTR.1
chr4	705174	SNV	1	A	G	99	147	67.3469	0.363636	35.1919	Gene: g4585, mRNA: g4585, Three_prime_utr: PAC:26906169.three_prime_UTR.1
chr17	4428564	Insertion	8	-	ATTCGGTG	20	30	66.6667	0.25	37.025	Gene: Cre17.g731800, mRNA: Cre17.g731800	Cre17.g731800:c.70+84_70+85insCACCGAAT
chr4	2334297	SNV	1	C	T	14	21	66.6667	0.214286	37	CDS: Cre04.g220750, Gene: Cre04.g220750, mRNA: Cre04.g220750	Cre04.g220750:c.576G>A
chr4	2333398	SNV	1	C	T	14	21	66.6667	0.357143	36.8571	CDS: Cre04.g220750, Gene: Cre04.g220750, mRNA: Cre04.g220750	Cre04.g220750:c.1475G>A	Cre04.g220750:p.Ser492Asn
chr6	2220874	SNV	1	T	A	18	27	66.6667	0	36.7222	Gene: g5977, mRNA: g5977
chr5	274726	SNV	1	A	C	21	32	65.625	0	37.2381
chr6	2220880	SNV	1	G	A	21	32	65.625	0	36.619	Gene: g5977, mRNA: g5977
chr4	705178	SNV	1	T	G	103	160	64.375	0.417476	34.4272	Gene: g4585, mRNA: g4585, Three_prime_utr: PAC:26906169.three_prime_UTR.1
chr7	5799075	Insertion	7	-	CCGGTGG	16	25	64	0.5	35.8571	Gene: Cre07.g353200, mRNA: Cre07.g353200, Three_prime_utr: PAC:26888916.three_prime_UTR.1
chr9	6714523	Insertion	2	-	AC	23	36	63.8889	0.217391	36.4565	Gene: Cre09.g408900, mRNA: Cre09.g408900	Cre09.g408900:c.1423-85_1423-84insGT
chr17	762224	Insertion	8	-	TTCCTGCA	31	49	63.2653	0.387097	35.8911	CDS: Cre17.g701450, Gene: Cre17.g701450, mRNA: Cre17.g701450	Cre17.g701450:c.35_36insTTCCTGCA	Cre17.g701450:p.His12fs
chr6	5306410	Deletion	1	A	-	29	46	63.0435	0.413793	25.8966	Gene: Cre06.g283000, mRNA: Cre06.g283000	Cre06.g283000:c.1417-34delA
chr2	6565379	Insertion	8	-	CGGCGAGT	25	40	62.5	0.36	35.415	Gene: Cre02.g117050, Gene: g2423, Five_prime_utr: PAC:26900032.five_prime_UTR.1, Five_prime_utr: PAC:26900030.five_prime_UTR.1, Five_prime_utr: PAC:26900031.five_prime_UTR.1, mRNA: Cre02.g117050, mRNA: g2423, mRNA: g2423
chr4	3645840	Insertion	8	-	ACCTATAG	15	24	62.5	0	35.85	Gene: Cre04.g228750, mRNA: Cre04.g228750	Cre04.g228750:c.201+30_201+31insACCTATAG
scaffold_22	123496	SNV	1	A	C	95	152	62.5	0.0421053	36.4211
scaffold_22	123498	SNV	1	A	T	95	152	62.5	0.0421053	36.4211
chr4	705184	Deletion	1	T	-	80	129	62.0155	0.325	32.8625	Gene: g4585, mRNA: g4585, Three_prime_utr: PAC:26906169.three_prime_UTR.1
chr2	8061697	SNV	1	C	T	21	34	61.7647	0.416667	38.0833	Gene: g2687, Gene: g2688, mRNA: g2687, mRNA: g2687, mRNA: g2687, mRNA: g2688, mRNA: g2688	g2687:c.[26+34G>A];[26+34G>A];[26+34G>A]
chr3	8352143	SNV	1	C	A	29	47	61.7021	0.482759	35.7759	Gene: Cre03.g198800, Five_prime_utr: PAC:26902141.five_prime_UTR.2, mRNA: Cre03.g198800
chr3	8352144	SNV	1	C	T	29	47	61.7021	0.482759	35.7759	Gene: Cre03.g198800, Five_prime_utr: PAC:26902141.five_prime_UTR.2, mRNA: Cre03.g198800
chr13	2988647	Insertion	1	-	T	103	167	61.6766	0.446602	33.7184	Gene: Cre13.g584170, mRNA: Cre13.g584170, Three_prime_utr: PAC:26898556.three_prime_UTR.1
chr9	3968407	Insertion	8	-	GTGCAAAA	41	67	61.194	0.390244	35.7622
chr8	4750579	SNV	1	A	T	14	23	60.8696	0.285714	37.5	Gene: g9044, mRNA: g9044, mRNA: g9044
chr6	2220949	SNV	1	A	G	45	74	60.8108	0.106383	36.5319	Gene: g5977, mRNA: g5977
chr6	2221005	SNV	1	A	C	46	76	60.5263	0.3125	34.6667	Gene: g5977, mRNA: g5977
chr12	1000178	Deletion	1	A	-	12	20	60	0.166667	31.25	Gene: g12153, mRNA: g12153	g12153:c.4032+40delT
chr2	8343765	Deletion	2	AG	-	15	25	60	0.466667	35.7333
chr4	2333893	SNV	1	T	C	15	25	60	0.294118	35.5882	CDS: Cre04.g220750, Gene: Cre04.g220750, mRNA: Cre04.g220750	Cre04.g220750:c.980A>G	Cre04.g220750:p.Lys327Arg
chr3	6949835	SNV	1	A	C	16	27	59.2593	0.1875	32.1875
chr8	4750576	SNV	1	A	G	16	27	59.2593	0.25	37.5	Gene: g9044, mRNA: g9044, mRNA: g9044
chr6	2221112	SNV	1	G	A	17	29	58.6207	0.176471	34.2353	Gene: g5977, mRNA: g5977
chr8	1632646	Insertion	10	-	CAAATAGTGA	34	58	58.6207	0.382353	37.0912
chr6	1383670	Insertion	8	-	TATGAGCT	24	41	58.5366	0	37.2135	Gene: Cre06.g258800, mRNA: Cre06.g258800	Cre06.g258800:c.9+7_9+8insTATGAGCT
chr2	1681372	Insertion	8	-	ATTAAAAC	29	50	58	0.206897	36.1164	Gene: Cre02.g085800, mRNA: Cre02.g085800, Three_prime_utr: PAC:26899892.three_prime_UTR.1
chr6	7880325	SNV	1	C	T	109	188	57.9787	0.472727	34.5818	Gene: Cre06.g303171, mRNA: Cre06.g303171, Three_prime_utr: PAC:26893592.three_prime_UTR.1
chr17	3544506	Insertion	8	-	CTGTCGGG	26	45	57.7778	0.384615	36.476
chr15	492624	SNV	1	A	C	15	26	57.6923	0.470588	35.8235	Gene: g15357, mRNA: g15357	g15357:c.1614+69T>G
chr17	3590789	Insertion	8	-	TGATACAT	29	51	56.8627	0.344828	36.4009	Gene: g17553, mRNA: g17553, Three_prime_utr: PAC:26896681.three_prime_UTR.1
chr5	274747	SNV	1	A	G	25	44	56.8182	0	37.56
chr10	681284	Insertion	8	-	ACTCTGTC	17	30	56.6667	0.470588	36.5882	Gene: g10448, mRNA: g10448	g10448:c.68-157_68-156insACTCTGTC
chr15	492595	SNV	1	A	G	13	23	56.5217	0.5	35.6429	Gene: g15357, mRNA: g15357	g15357:c.1614+98T>C
chr17	4821089	Deletion	1	C	-	14	25	56	0.214286	31.2143	Gene: Cre17.g733950, mRNA: Cre17.g733950	Cre17.g733950:c.1030+34delG
chr3	968671	Insertion	8	-	TGAGCAGG	33	59	55.9322	0.333333	35.2689	Gene: Cre03.g148000, Five_prime_utr: PAC:26901430.five_prime_UTR.1, mRNA: Cre03.g148000
chr4	2334439	SNV	1	G	T	19	34	55.8824	0.1	36.55	CDS: Cre04.g220750, Gene: Cre04.g220750, mRNA: Cre04.g220750	Cre04.g220750:c.434C>A	Cre04.g220750:p.Thr145Asn
chr9	6844045	SNV	1	C	T	19	34	55.8824	0.315789	33.8947	Gene: Cre09.g409800, mRNA: Cre09.g409800	Cre09.g409800:c.942+43G>A
chr6	1842034	Insertion	9	-	GACACAGCT	24	43	55.814	0.375	36.6343
chr3	8270892	Insertion	8	-	CGGTCCGA	31	56	55.3571	0.419355	37.0444
chr17	6612621	SNV	1	T	C	26	47	55.3191	0.259259	35.5926
chr5	274729	SNV	1	G	A	21	38	55.2632	0	37.9048
chr12	6646325	SNV	1	C	A	11	20	55	0.166667	35
chr15	111489	SNV	1	T	C	11	20	55	0.454545	35.7273	Gene: g15310, mRNA: g15310, Three_prime_utr: PAC:26898246.three_prime_UTR.1
scaffold_22	1779	SNV	1	G	A	34	62	54.8387	0.297297	35.1351	CDS: g18199, Gene: g18199, mRNA: g18199	g18199:c.66C>T
chr11	3613433	Insertion	8	-	GTCGAACC	40	73	54.7945	0.45	35.7406	Gene: Cre11.g482050, mRNA: Cre11.g482050, Three_prime_utr: PAC:26890355.three_prime_UTR.1
chr5	1274933	SNV	1	T	C	12	22	54.5455	0.428571	37.2143
chr3	6950169	Deletion	1	C	-	62	114	54.386	0.0483871	32.8387
chr16	7007828	Insertion	8	-	TTGACTCA	25	46	54.3478	0.4	36.76
chr7	2605613	Insertion	8	-	CCACATGG	38	70	54.2857	0.447368	36.4441
scaffold_22	31880	Deletion	2	AG	-	27	50	54	0	33.9259	Gene: g18206, mRNA: g18206, mRNA: g18206, Three_prime_utr: PAC:26892849.three_prime_UTR.1, Three_prime_utr: PAC:26892850.three_prime_UTR.1
chr10	4921537	SNV	1	A	G	36	67	53.7313	0.444444	32.9444	CDS: Cre10.g454900, Gene: Cre10.g454900, mRNA: Cre10.g454900	Cre10.g454900:c.488A>G	Cre10.g454900:p.Glu163Gly
chr17	1052015	Insertion	7	-	TACGTTT	58	108	53.7037	0.465517	36.8399
chr16	3873927	Insertion	7	-	GGCGTGC	22	41	53.6585	0.318182	36.539
chr14	200755	SNV	1	T	A	15	28	53.5714	0.277778	35.1667	Gene: g14683, mRNA: g14683	g14683:c.520-190A>T
chr12	911355	Deletion	7	AACAACA	-	23	43	53.4884	0	34.913	Gene: g12149, mRNA: g12149	g12149:c.3172+1190_3172+1196delTGTTGTT
chr9	4440434	Insertion	8	-	GACGCGAG	33	62	53.2258	0.363636	35.8788	Gene: g9813, Five_prime_utr: PAC:26895092.five_prime_UTR.1, mRNA: g9813
chr1	2987837	Insertion	10	-	ATCCGCACAA	17	32	53.125	0.176471	37.0529
chr10	4921549	SNV	1	A	G	35	66	53.0303	0.342857	33.8286	CDS: Cre10.g454900, Gene: Cre10.g454900, mRNA: Cre10.g454900	Cre10.g454900:c.500A>G	Cre10.g454900:p.Glu167Gly
chr11	442577	SNV	1	A	G	22	42	52.381	0.363636	36.4091	Gene: g11518, mRNA: g11518, Three_prime_utr: PAC:26890138.three_prime_UTR.1
chr11	420277	Deletion	1	C	-	11	21	52.381	0.181818	31	CDS: g11514, Gene: g11514, mRNA: g11514	g11514:c.327delC	g11514:p.Pro109fs
chr16	1416053	SNV	1	C	A	11	21	52.381	0.0909091	35.7273	Gene: Cre16.g652300, mRNA: Cre16.g652300	Cre16.g652300:c.178+395C>A
chr2	6971935	SNV	1	C	T	11	21	52.381	0.454545	36.4545
chr4	2333814	SNV	1	G	A	12	23	52.1739	0.307692	37.1538	CDS: Cre04.g220750, Gene: Cre04.g220750, mRNA: Cre04.g220750	Cre04.g220750:c.1059C>T
chr4	3831776	SNV	1	G	C	12	23	52.1739	0.333333	35
chr5	1274926	SNV	1	C	G	13	25	52	0.4	36.5333
chr7	4461868	Insertion	8	-	TCAGCATG	39	75	52	0.410256	36.8141	Gene: Cre07.g343300, Five_prime_utr: PAC:26888923.five_prime_UTR.1, mRNA: Cre07.g343300
chr17	974802	SNV	1	G	T	14	27	51.8519	0.4	36.0667	CDS: Cre17.g703100, Gene: Cre17.g703100, mRNA: Cre17.g703100	Cre17.g703100:c.393G>T
chr6	1188899	SNV	1	A	C	14	27	51.8519	0.214286	35.5714	Gene: Cre06.g257500, Five_prime_utr: PAC:26893029.five_prime_UTR.1, mRNA: Cre06.g257500
chr6	7880332	SNV	1	G	A	86	166	51.8072	0.494253	33.7701	Gene: Cre06.g303171, mRNA: Cre06.g303171, Three_prime_utr: PAC:26893592.three_prime_UTR.1
chr5	1274541	SNV	1	G	A	15	29	51.7241	0.1875	36.875
chr1	4569180	Deletion	1	C	-	16	31	51.6129	0.375	32.0625	Gene: Cre01.g031250, mRNA: Cre01.g031250, Three_prime_utr: PAC:26903205.three_prime_UTR.1
chr17	6612614	SNV	1	C	T	18	35	51.4286	0.210526	34.1053
chr7	4593066	SNV	1	G	T	19	37	51.3514	0.263158	33.0526	Gene: Cre07.g344100, Gene: g8005, mRNA: Cre07.g344100, mRNA: g8005, mRNA: g8005	Cre07.g344100:c.[4377+75C>A]; g8005:c.[4380+75C>A];[4455+75C>A]
chr3	8415422	SNV	1	G	A	96	189	50.7937	0.1875	34.8854	Gene: g4359, Five_prime_utr: PAC:26902533.five_prime_UTR.1, mRNA: g4359
chr12	1000168	SNV	1	T	C	12	24	50	0.166667	35.1667	Gene: g12153, mRNA: g12153	g12153:c.4032+50A>G
chr12	679898	SNV	1	T	C	13	26	50	0.0769231	36.2308	Gene: g12114, mRNA: g12114
chr12	6777866	SNV	1	G	A	10	20	50	0.1	37.8
chr13	2348220	SNV	1	C	A	20	40	50	0.15	36.275	CDS: Cre13.g579300, Gene: Cre13.g579300, mRNA: Cre13.g579300	Cre13.g579300:c.152G>T	Cre13.g579300:p.Arg51Leu
chr13	2348221	SNV	1	T	G	20	40	50	0.15	36.275	CDS: Cre13.g579300, Gene: Cre13.g579300, mRNA: Cre13.g579300	Cre13.g579300:c.151A>C	Cre13.g579300:p.Arg51Leu
chr15	1414821	SNV	1	A	G	10	20	50	0.272727	33.5455
chr16	3002067	SNV	1	T	C	15	30	50	0.2	35.8	Gene: Cre16.g664600, Five_prime_utr: PAC:26892177.five_prime_UTR.1, mRNA: Cre16.g664600
chr3	4366590	Insertion	8	-	GCATCGAG	26	52	50	0.423077	37.4327
chr4	2333543	SNV	1	G	A	11	22	50	0.181818	36.2727	CDS: Cre04.g220750, Gene: Cre04.g220750, mRNA: Cre04.g220750	Cre04.g220750:c.1330C>T
chr4	2333559	SNV	1	G	C	11	22	50	0.181818	36.2727	CDS: Cre04.g220750, Gene: Cre04.g220750, mRNA: Cre04.g220750	Cre04.g220750:c.1314C>G
chr6	4397187	Deletion	10	GAGAAGAAAA	-	10	20	50	0.4	34.5	Gene: g6416, mRNA: g6416, Three_prime_utr: PAC:26893482.three_prime_UTR.1
chr9	2228546	SNV	1	G	A	35	71	49.2958	0.114286	34.8286	Gene: Cre09.g392850, mRNA: Cre09.g392850	Cre09.g392850:c.6749+36C>T
chr6	4779953	SNV	1	A	G	25	51	49.0196	0.428571	37
chr16	5779087	Deletion	2	GC	-	24	49	48.9796	0.166667	30.125	Gene: Cre16.g678450, mRNA: Cre16.g678450	Cre16.g678450:c.451-89_451-88delGC
chr7	3549467	SNV	1	G	C	24	49	48.9796	0.125	34.875
chr13	2241530	Insertion	8	-	AATCTGAG	21	43	48.8372	0.285714	36.6548
chr16	5779081	SNV	1	G	A	21	43	48.8372	0.047619	35.2381	Gene: Cre16.g678450, mRNA: Cre16.g678450	Cre16.g678450:c.451-82C>T
chr2	8066403	SNV	1	T	C	21	43	48.8372	0.26087	35.6522	Gene: g2687, Gene: g2688, mRNA: g2687, mRNA: g2687, mRNA: g2687, mRNA: g2688, mRNA: g2688, Three_prime_utr: PAC:26899741.three_prime_UTR.5, Three_prime_utr: PAC:26899742.three_prime_UTR.5
chr4	212831	Deletion	1	G	-	41	84	48.8095	0.439024	31.2195
chr10	6528520	Insertion	8	-	TCACCGCC	18	37	48.6486	0.444444	36.5625
scaffold_22	12762	SNV	1	T	G	17	35	48.5714	0	36.1176
chr13	4152280	SNV	1	G	C	15	31	48.3871	0.466667	34.5333
chr16	3248459	SNV	1	T	C	14	29	48.2759	0.5	38.375	CDS: g16088, Gene: g16088, mRNA: g16088	g16088:c.618A>G
chr6	1188902	SNV	1	C	G	14	29	48.2759	0.214286	35.6429	Gene: Cre06.g257500, Five_prime_utr: PAC:26893029.five_prime_UTR.1, mRNA: Cre06.g257500
chr3	6950172	Insertion	1	-	C	54	112	48.2143	0.0555556	36.5741
chr6	6907157	SNV	1	C	G	13	27	48.1481	0	33.8462	CDS: g6845, Gene: g6845, mRNA: g6845	g6845:c.1446C>G
chr8	2277650	Insertion	1	-	T	13	27	48.1481	0.153846	36.6154
chr15	492586	SNV	1	T	C	12	25	48	0.461538	35.2308	Gene: g15357, mRNA: g15357	g15357:c.1614+107A>G
chr15	1450910	Deletion	1	C	-	24	50	48	0.125	32.9167
chr16	6098405	Insertion	1	-	C	11	23	47.8261	0.272727	36.0909
chr6	5075752	Insertion	8	-	GTCAGGAA	22	46	47.8261	0.454545	35.2102
scaffold_29	42719	SNV	1	C	A	11	23	47.8261	0	36.9091	Gene: g18323, Three_prime_utr: PAC:26904296.three_prime_UTR.1, mRNA: g18323
chr12	1000185	SNV	1	C	T	10	21	47.619	0.2	34.3	Gene: g12153, mRNA: g12153	g12153:c.4032+33G>A
chr17	660595	SNV	1	G	A	40	84	47.619	0.463415	34.7073	Gene: Cre17.g700600, mRNA: Cre17.g700600
chr2	8912312	SNV	1	G	T	10	21	47.619	0.3	35.8
chr5	1274910	SNV	1	G	A	10	21	47.619	0.3	36.4
chr3	3816905	Insertion	7	-	GTCCCGA	18	38	47.3684	0.444444	37.873
chr4	1140852	SNV	1	C	A	18	38	47.3684	0.45	36.7
chr4	2331932	SNV	1	A	C	15	32	46.875	0.125	35.5	CDS: Cre04.g220750, Gene: Cre04.g220750, mRNA: Cre04.g220750	Cre04.g220750:c.2941T>G	Cre04.g220750:p.Ser981Ala
chr6	5306430	SNV	1	C	A	15	32	46.875	0.2	32.7333	Gene: Cre06.g283000, mRNA: Cre06.g283000	Cre06.g283000:c.1417-14C>A
chr13	2813588	SNV	1	C	G	21	45	46.6667	0.47619	36.3333	Gene: Cre13.g583100, mRNA: Cre13.g583100, Three_prime_utr: PAC:26898695.three_prime_UTR.1
chr17	660622	SNV	1	C	G	35	75	46.6667	0.485714	35.4857	Gene: Cre17.g700600, mRNA: Cre17.g700600
chr5	1274949	SNV	1	G	A	14	30	46.6667	0.4375	36.375
chr15	1834504	SNV	1	C	A	13	28	46.4286	0	37.3846	Gene: g15525, mRNA: g15525	g15525:c.2582-13G>T
chr6	1184981	Insertion	9	-	TGACCAGTC	13	28	46.4286	0.461538	37.2222	Gene: Cre06.g257450, Five_prime_utr: PAC:26893545.five_prime_UTR.1, mRNA: Cre06.g257450
chr6	6907175	SNV	1	A	C	13	28	46.4286	0	35.8462	CDS: g6845, Gene: g6845, mRNA: g6845	g6845:c.1464A>C
chr8	2280473	SNV	1	G	A	26	56	46.4286	0.0384615	36.8269
chr8	2280474	SNV	1	C	G	26	56	46.4286	0.0384615	36.8269
chr4	705145	SNV	1	T	C	55	119	46.2185	0.290909	33.9818	Gene: g4585, mRNA: g4585, Three_prime_utr: PAC:26906169.three_prime_UTR.1
chr15	492604	SNV	1	C	T	12	26	46.1538	0.4375	36.6875	Gene: g15357, mRNA: g15357	g15357:c.1614+89G>A
chr16	1416044	SNV	1	A	G	12	26	46.1538	0.0833333	36	Gene: Cre16.g652300, mRNA: Cre16.g652300	Cre16.g652300:c.178+386A>G
chr4	741748	SNV	1	C	G	18	39	46.1538	0.166667	36.2222	CDS: g4593, Gene: g4593, mRNA: g4593	g4593:c.24C>G	g4593:p.Asp8Glu
chr8	347913	SNV	1	A	G	18	39	46.1538	0.333333	34.2222	Gene: g8386, mRNA: g8386, Three_prime_utr: PAC:26888474.three_prime_UTR.1
chr17	2929758	SNV	1	G	T	23	50	46	0.423077	35.8462	Gene: g17423, mRNA: g17423	g17423:c.2888-6C>A
chr17	2713335	SNV	1	G	A	91	198	45.9596	0.373626	33.7802	Gene: Cre17.g718050, Five_prime_utr: PAC:26896378.five_prime_UTR.1, mRNA: Cre17.g718050
chr6	8745528	SNV	1	G	C	22	48	45.8333	0.0909091	36.3636	CDS: g7170, CDS: Cre06.g309850, Gene: Cre06.g309850, Gene: g7170, mRNA: Cre06.g309850, mRNA: g7170	Cre06.g309850:c.[149C>G]; g7170:c.[233C>G]	Cre06.g309850:p.[Ser50Cys]; g7170:p.[Ser78Cys]
scaffold_22	122296	SNV	1	T	G	11	24	45.8333	0.0909091	36.0455
chr10	1267337	Insertion	8	-	TGCATCGC	15	33	45.4545	0.4	37.4167	Gene: Cre10.g426900, mRNA: Cre10.g426900, Three_prime_utr: PAC:26905420.three_prime_UTR.1
chr12	209564	SNV	1	C	G	10	22	45.4545	0.2	34.9	CDS: g12033, CDS: g12033, Gene: g12033, mRNA: g12033, mRNA: g12033	g12033:c.[156C>G];[156C>G]
chr13	3036308	SNV	1	C	T	10	22	45.4545	0.3	36	CDS: g14346, CDS: g14346, Gene: g14346, mRNA: g14346, mRNA: g14346	g14346:c.[17718G>A];[18630G>A]
chr16	3002063	SNV	1	A	T	10	22	45.4545	0.3	36.2	Gene: Cre16.g664600, Five_prime_utr: PAC:26892177.five_prime_UTR.1, mRNA: Cre16.g664600
chr17	4008829	Deletion	1	A	-	15	33	45.4545	0.4	35.2	Gene: Cre17.g728950, mRNA: Cre17.g728950	Cre17.g728950:c.698+103delT
chr6	5306405	SNV	1	C	T	15	33	45.4545	0.466667	32.8	Gene: Cre06.g283000, mRNA: Cre06.g283000	Cre06.g283000:c.1417-39C>T
chr7	2400261	Insertion	2	-	CA	15	33	45.4545	0.133333	35.2	Gene: Cre07.g328600, mRNA: Cre07.g328600	Cre07.g328600:c.975+69_975+70insTG
chr15	1467769	SNV	1	G	A	14	31	45.1613	0.214286	35.3929	Gene: g15492, mRNA: g15492	g15492:c.3838-382G>A
chr15	1467770	SNV	1	A	G	14	31	45.1613	0.214286	35.3929	Gene: g15492, mRNA: g15492	g15492:c.3838-381A>G
chr6	5306409	SNV	1	C	T	14	31	45.1613	0.428571	32.3571	Gene: Cre06.g283000, mRNA: Cre06.g283000	Cre06.g283000:c.1417-35C>T
chr7	3549431	SNV	1	A	G	28	62	45.1613	0.172414	35.0345
chr11	1877535	SNV	1	T	C	9	20	45	0.181818	36.8182
chr2	8979964	SNV	1	G	A	9	20	45	0	35.6667	CDS: g2806, Gene: g2806, mRNA: g2806	g2806:c.1066C>T	g2806:p.Arg356Cys
chr6	7880314	SNV	1	G	A	71	158	44.9367	0.478873	33.662	Gene: Cre06.g303171, mRNA: Cre06.g303171, Three_prime_utr: PAC:26893592.three_prime_UTR.1
chr4	2334451	SNV	1	C	T	13	29	44.8276	0	36.1154	CDS: Cre04.g220750, Gene: Cre04.g220750, mRNA: Cre04.g220750	Cre04.g220750:c.422G>A	Cre04.g220750:p.Gly141Asn
chr1	4450253	Insertion	8	-	ATCTGCTA	21	47	44.6809	0.47619	37.756	CDS: Cre01.g030200, Gene: Cre01.g030200, mRNA: Cre01.g030200	Cre01.g030200:c.698_699insTAGCAGAT	Cre01.g030200:p.Asn233fs
scaffold_22	1782	SNV	1	C	A	21	47	44.6809	0.346154	35.6154	CDS: g18199, Gene: g18199, mRNA: g18199	g18199:c.63G>T
chr6	7880311	SNV	1	A	G	65	146	44.5205	0.323077	34.8615	Gene: Cre06.g303171, mRNA: Cre06.g303171, Three_prime_utr: PAC:26893592.three_prime_UTR.1
chr16	11826	SNV	1	T	C	12	27	44.4444	0.384615	35.8462	CDS: g15545, Gene: g15545, mRNA: g15545	g15545:c.455A>G	g15545:p.Asp152Gly
chr2	6971902	SNV	1	A	G	12	27	44.4444	0.461538	36
chr7	3549427	SNV	1	G	C	28	63	44.4444	0.3	34.7333
chr8	2277644	SNV	1	A	C	12	27	44.4444	0.230769	37.1538
chr14	2399367	Deletion	1	C	-	11	25	44	0.272727	29.4545	Gene: Cre14.g624450, Five_prime_utr: PAC:26891136.five_prime_UTR.1, mRNA: Cre14.g624450
chr2	8912272	SNV	1	G	C	11	25	44	0.363636	36.4545
chr9	2228565	SNV	1	C	G	27	62	43.5484	0.222222	33	Gene: Cre09.g392850, mRNA: Cre09.g392850	Cre09.g392850:c.6749+17G>C
chr10	2370376	SNV	1	A	G	10	23	43.4783	0.363636	35.5455
chr12	907407	SNV	1	T	C	10	23	43.4783	0.307692	36	CDS: g12149, Gene: g12149, mRNA: g12149	g12149:c.4000A>G	g12149:p.Asn1334Asp
chr4	2334319	Insertion	3	-	AGC	10	23	43.4783	0.3	35.5667	CDS: Cre04.g220750, Gene: Cre04.g220750, mRNA: Cre04.g220750	Cre04.g220750:c.554_555insGCT	Cre04.g220750:p.Thr185delinsThrLeu
chr2	6971897	Deletion	1	G	-	13	30	43.3333	0.461538	30.5385
chr11	426792	SNV	1	T	G	19	44	43.1818	0.0526316	36.6842	Gene: g11515, mRNA: g11515, mRNA: g11515	g11515:c.[1048+91T>G];[1045+91T>G]
chr1	3288234	Deletion	1	G	-	9	21	42.8571	0.333333	30.3333
chr14	635730	SNV	1	T	C	9	21	42.8571	0.111111	38	Gene: Cre14.g612200, Gene: g14753, mRNA: Cre14.g612200, mRNA: g14753	g14753:c.[536+459T>C]; Cre14.g612200:c.[536+459T>C]
chr16	6975843	SNV	1	A	C	9	21	42.8571	0.444444	34	Gene: g16748, mRNA: g16748, Three_prime_utr: PAC:26891848.three_prime_UTR.1
chr17	531413	Deletion	2	AC	-	9	21	42.8571	0.111111	34.2222	Gene: Cre17.g699550, mRNA: Cre17.g699550	Cre17.g699550:c.2857-278_2857-277delGT
chr4	3831769	SNV	1	G	A	12	28	42.8571	0.333333	34.4167
chr8	3194397	SNV	1	C	A	9	21	42.8571	0.3	35.2	CDS: g8799, Gene: g8799, mRNA: g8799	g8799:c.297G>T
scaffold_22	123506	Deletion	2	TT	-	69	161	42.8571	0.057971	35.3043
chr7	4386051	SNV	1	G	A	26	61	42.623	0.392857	34.4286	Gene: Cre07.g341100, Gene: g7973, mRNA: Cre07.g341100, mRNA: g7973	Cre07.g341100:c.[289-60G>A]; g7973:c.[289-204G>A]
chr4	3981502	SNV	1	T	G	17	40	42.5	0.4	38.05
chr4	1355025	Insertion	2	-	GT	14	33	42.4242	0.0714286	37.75	Gene: g4685, mRNA: g4685	g4685:c.2068-37_2068-36insAC
chr1	383534	SNV	1	A	G	11	26	42.3077	0.272727	35.4545
chr8	3522245	Deletion	1	G	-	19	45	42.2222	0.421053	32.9474	Gene: Cre08.g375200, Gene: g8840, mRNA: Cre08.g375200, mRNA: g8840	Cre08.g375200:c.[903+531delG]; g8840:c.[903+531delG]
chr7	3550032	SNV	1	G	A	24	57	42.1053	0.333333	35.3333
chr4	861315	SNV	1	A	G	13	31	41.9355	0.428571	35.7143	CDS: g4616, Gene: g4616, mRNA: g4616	g4616:c.152A>G	g4616:p.His51Arg
chr16	3002060	Deletion	1	A	-	10	24	41.6667	0.3	32.5	Gene: Cre16.g664600, Five_prime_utr: PAC:26892177.five_prime_UTR.1, mRNA: Cre16.g664600
chr5	2416554	SNV	1	C	T	27	65	41.5385	0.482759	35.6552
chr9	1495655	SNV	1	A	G	29	70	41.4286	0.433333	36.4667
chr8	2277783	SNV	1	G	T	12	29	41.3793	0.230769	35.6154
scaffold_21	134278	SNV	1	G	A	26	63	41.2698	0.464286	35.4643
chr13	4597408	Insertion	2	-	GT	28	68	41.1765	0.321429	36.4107	Gene: Cre13.g604000, mRNA: Cre13.g604000, Three_prime_utr: PAC:26899235.three_prime_UTR.1
chr10	4953483	SNV	1	T	C	23	56	41.0714	0	36.3913
chr7	3549448	Deletion	4	GGGC	-	23	56	41.0714	0.130435	30.2609
chr13	4152280	Insertion	8	-	CCCATGGC	32	78	41.0256	0.5	35.5664
chr3	5077112	Insertion	8	-	CCATGCAG	16	39	41.0256	0.3125	36.0781	CDS: Cre03.g181150, Gene: Cre03.g181150, mRNA: Cre03.g181150	Cre03.g181150:c.60_61insCCATGCAG	Cre03.g181150:p.Ala21fs
chr10	3623256	SNV	1	T	C	9	22	40.9091	0.333333	37.6667
chr12	907394	SNV	1	G	C	9	22	40.9091	0.3	36.1	CDS: g12149, Gene: g12149, mRNA: g12149	g12149:c.4013C>G	g12149:p.Ala1338Gly
chr12	209570	SNV	1	A	G	9	22	40.9091	0.222222	34.3333	CDS: g12033, CDS: g12033, Gene: g12033, mRNA: g12033, mRNA: g12033	g12033:c.[162A>G];[162A>G]
chr14	4118463	Deletion	1	A	-	9	22	40.9091	0.111111	26.2222	Gene: Cre14.g634150, mRNA: Cre14.g634150
chr16	665647	SNV	1	G	T	9	22	40.9091	0.333333	35.6667
chr2	8197179	SNV	1	T	A	18	44	40.9091	0.368421	37.5789	Gene: g2692, mRNA: g2692, Three_prime_utr: PAC:26899558.three_prime_UTR.1
chr2	8979959	SNV	1	A	T	9	22	40.9091	0	37.2222	CDS: g2806, Gene: g2806, mRNA: g2806	g2806:c.1071T>A
chr15	489180	SNV	1	G	A	22	54	40.7407	0.291667	34.9167	Gene: Cre15.g636650, mRNA: Cre15.g636650, Three_prime_utr: PAC:26898241.three_prime_UTR.1
chr7	3549399	Deletion	1	G	-	37	91	40.6593	0.189189	33.3514
chr6	7880307	SNV	1	C	T	56	138	40.5797	0.357143	34.7321	Gene: Cre06.g303171, mRNA: Cre06.g303171, Three_prime_utr: PAC:26893592.three_prime_UTR.1
chr4	1140857	SNV	1	T	C	15	37	40.5405	0.375	36.1875
chr11	431591	SNV	1	A	C	32	79	40.5063	0.454545	36.9697	CDS: g11516, Gene: g11516, mRNA: g11516	g11516:c.322A>C	g11516:p.Lys108Gln
scaffold_23	74920	SNV	1	A	C	17	42	40.4762	0	35.2353
chr4	212860	SNV	1	C	T	21	52	40.3846	0.380952	33.619
chr2	2966466	SNV	1	C	A	25	62	40.3226	0.44	32.96	Gene: g1807, mRNA: g1807, Three_prime_utr: PAC:26900355.three_prime_UTR.1
chr1	990413	SNV	1	C	G	14	35	40	0.0666667	37.4
chr10	4966094	Deletion	1	A	-	12	30	40	0.5	29.1667	Gene: g11170, mRNA: g11170	g11170:c.239-39delT
chr12	3532250	Deletion	2	TG	-	8	20	40	0.375	31.375	Gene: Cre12.g513300, mRNA: Cre12.g513300	Cre12.g513300:c.631+40_631+41delTG
chr16	3292976	SNV	1	G	A	16	40	40	0.3125	36.5
chr2	9051204	SNV	1	A	T	16	40	40	0	37.375	Gene: g2819, mRNA: g2819, Three_prime_utr: PAC:26900969.three_prime_UTR.1
chr3	4522930	SNV	1	G	A	8	20	40	0.125	35.8125	CDS: g3646, CDS: g3646, Gene: g3646, mRNA: g3646, mRNA: g3646	g3646:c.[55C>T];[10C>T]	g3646:p.[Arg19Cys];[Arg4Cys]
chr3	4523267	SNV	1	A	T	16	40	40	0.25	35.9062
chr3	4523269	SNV	1	G	T	16	40	40	0.25	35.9062
chr4	1075887	SNV	1	G	T	22	55	40	0.454545	36.5	Gene: Cre04.g216300, mRNA: Cre04.g216300	Cre04.g216300:c.334+529G>T
chr4	821893	SNV	1	T	A	24	60	40	0.166667	38
chr7	3199950	SNV	1	G	C	10	25	40	0	37.9
chr8	3775498	SNV	1	T	G	8	20	40	0.444444	36.5556
chr14	2646291	SNV	1	A	C	25	63	39.6825	0.48	36.28	Gene: Cre14.g626300, mRNA: Cre14.g626300, Three_prime_utr: PAC:26890799.three_prime_UTR.1
chr1	990355	SNV	1	C	G	17	43	39.5349	0.210526	35.8421
chr10	3539001	SNV	1	G	A	17	43	39.5349	0.294118	36.4118
chr8	347968	SNV	1	G	T	34	86	39.5349	0.485714	35.3714	Gene: g8386, mRNA: g8386, Three_prime_utr: PAC:26888474.three_prime_UTR.1
chr15	489169	SNV	1	A	G	15	38	39.4737	0.0666667	37.5	Gene: Cre15.g636650, mRNA: Cre15.g636650, Three_prime_utr: PAC:26898241.three_prime_UTR.1
chr15	489171	SNV	1	G	T	15	38	39.4737	0.0666667	37.5	Gene: Cre15.g636650, mRNA: Cre15.g636650, Three_prime_utr: PAC:26898241.three_prime_UTR.1
chr17	660626	SNV	1	C	T	30	76	39.4737	0.4	34.5667	Gene: Cre17.g700600, mRNA: Cre17.g700600
chr2	6618477	SNV	1	A	G	15	38	39.4737	0.375	36.6875
chr4	714241	SNV	1	C	T	15	38	39.4737	0.266667	35.8
chr2	6171977	SNV	1	G	A	13	33	39.3939	0.384615	34.6923	Gene: Cre02.g113700, mRNA: Cre02.g113700, Three_prime_utr: PAC:26899975.three_prime_UTR.1
chr2	8979903	SNV	1	G	A	13	33	39.3939	0.1875	36.5625	CDS: g2806, Gene: g2806, mRNA: g2806	g2806:c.1127C>T	g2806:p.Ser376Phe
chr13	2685290	SNV	1	G	A	11	28	39.2857	0.0909091	37.7273	Gene: g14290, mRNA: g14290	g14290:c.8-435C>T
chr5	2941846	SNV	1	C	G	11	28	39.2857	0.5	36.6429	Gene: g5485, mRNA: g5485	g5485:c.1567-573G>C
chr8	3775531	SNV	1	C	T	11	28	39.2857	0.416667	34.8333
chr12	6777810	SNV	1	C	T	9	23	39.1304	0.333333	37.1111
chr17	981288	SNV	1	G	C	9	23	39.1304	0.4	36.7
chr17	984879	SNV	1	G	C	18	46	39.1304	0.368421	36
chr4	793805	SNV	1	G	A	18	46	39.1304	0.333333	35.2222
chr6	6907152	SNV	1	G	T	9	23	39.1304	0	32.1111	CDS: g6845, Gene: g6845, mRNA: g6845	g6845:c.1441G>T	g6845:p.Gly481Cys
chr8	3086454	SNV	1	G	A	23	59	38.9831	0.347826	36.2174	Gene: g8786, mRNA: g8786	g8786:c.212-213G>A
chr6	2200858	SNV	1	G	A	19	49	38.7755	0.315789	35.9737	Gene: g5972, mRNA: g5972	g5972:c.1606+115C>T
chr7	3550049	SNV	1	A	C	22	57	38.5965	0.409091	36.2727
chr6	2845782	SNV	1	C	T	52	135	38.5185	0.403846	34.0962	Gene: Cre06.g271800, Gene: g6099, mRNA: Cre06.g271800, mRNA: g6099, Three_prime_utr: PAC:26892966.three_prime_UTR.2, Three_prime_utr: PAC:26892965.three_prime_UTR.1
chr10	1713394	SNV	1	T	C	15	39	38.4615	0.4375	35.8125	Gene: Cre10.g430450, mRNA: Cre10.g430450	Cre10.g430450:c.993-213A>G
chr16	11829	SNV	1	C	A	10	26	38.4615	0.3	35.7	CDS: g15545, Gene: g15545, mRNA: g15545	g15545:c.452G>T	g15545:p.Arg151Met
chr2	8063795	SNV	1	G	T	20	52	38.4615	0.238095	36.9048	Gene: g2687, Gene: g2688, mRNA: g2687, mRNA: g2687, mRNA: g2687, mRNA: g2688, mRNA: g2688, Three_prime_utr: PAC:26899741.three_prime_UTR.6, Three_prime_utr: PAC:26899742.three_prime_UTR.6
chr4	741751	SNV	1	G	A	15	39	38.4615	0.133333	36.0667	CDS: g4593, Gene: g4593, mRNA: g4593	g4593:c.27G>A
chr4	259301	SNV	1	T	C	10	26	38.4615	0	35.7
chr5	2362163	SNV	1	G	A	10	26	38.4615	0.25	35.4167
chr6	8745601	SNV	1	C	T	20	52	38.4615	0.363636	35.5	CDS: g7170, CDS: Cre06.g309850, Gene: Cre06.g309850, Gene: g7170, mRNA: Cre06.g309850, mRNA: g7170	Cre06.g309850:c.[76G>A]; g7170:c.[160G>A]	Cre06.g309850:p.[Ala26Thr]; g7170:p.[Ala54Thr]
chr7	3019492	SNV	1	T	C	10	26	38.4615	0	38.4	Gene: Cre07.g333400, mRNA: Cre07.g333400	Cre07.g333400:c.1105-458T>C
scaffold_22	1766	Deletion	1	T	-	20	52	38.4615	0.25	31.75	CDS: g18199, Gene: g18199, mRNA: g18199	g18199:c.79delA	g18199:p.Ile27fs
chr3	6950759	SNV	1	C	A	68	177	38.4181	0.176471	36.6324
chr12	151090	SNV	1	A	G	61	159	38.3648	0.212121	36.1212	Gene: Cre12.g484450, Five_prime_utr: PAC:26906549.five_prime_UTR.1, mRNA: Cre12.g484450
chr2	2644	SNV	1	T	A	52	136	38.2353	0.358491	36.4717
chr1	3166419	SNV	1	C	G	8	21	38.0952	0.375	35.375
chr10	3540130	SNV	1	C	T	16	42	38.0952	0.3125	36.5
chr17	966523	SNV	1	C	G	8	21	38.0952	0.375	34.625	Gene: g17044, mRNA: g17044, Three_prime_utr: PAC:26896860.three_prime_UTR.1
chr17	3136273	SNV	1	C	T	8	21	38.0952	0.375	34.75	Gene: Cre17.g721550, Gene: g17457, mRNA: Cre17.g721550, mRNA: g17457	Cre17.g721550:c.[118-61G>A]; g17457:c.[118-61G>A]
chr2	9076635	SNV	1	T	G	8	21	38.0952	0.444444	36.8889
chr3	1735968	Insertion	8	-	AGCTGAAC	16	42	38.0952	0.125	38.8281
chr9	5405150	SNV	1	A	G	8	21	38.0952	0.125	36.75	CDS: g9946, Gene: g9946, mRNA: g9946	g9946:c.882A>G
scaffold_30	9729	SNV	1	T	C	8	21	38.0952	0.375	38.625
chr8	585657	SNV	1	G	A	11	29	37.931	0	37.5455	Gene: Cre08.g359567, Gene: g8422, mRNA: Cre08.g359567, mRNA: g8422	g8422:c.[1978-274G>A]; Cre08.g359567:c.[1978-277G>A]
chr9	318659	SNV	1	A	C	44	116	37.931	0.446809	36.234
chr3	1035604	SNV	1	T	C	14	37	37.8378	0.4375	35.625
chr4	212866	SNV	1	T	A	14	37	37.8378	0.142857	35.5714
chr6	6688836	SNV	1	C	T	14	37	37.8378	0.285714	37
chr7	3549398	SNV	1	T	C	32	85	37.6471	0.205882	36.0294
chr6	2845785	SNV	1	C	T	53	141	37.5887	0.264151	33.5094	Gene: Cre06.g271800, Gene: g6099, mRNA: Cre06.g271800, mRNA: g6099, Three_prime_utr: PAC:26892966.three_prime_UTR.2, Three_prime_utr: PAC:26892965.three_prime_UTR.1
chr11	426223	Deletion	3	CGC	-	12	32	37.5	0.333333	34.75	CDS: g11515, CDS: g11515, Gene: g11515, mRNA: g11515, mRNA: g11515	g11515:c.[570_572delCGC];[567_569delCGC]	g11515:p.[Ala190_Ala191delinsAla];[Ala189_Ala190delinsAla]
chr11	3730234	Insertion	8	-	GCAACAAG	21	56	37.5	0.285714	36.5833
chr13	2939140	SNV	1	C	T	15	40	37.5	0.333333	34.2	Gene: g14332, mRNA: g14332	g14332:c.112+33C>T
chr15	1434052	SNV	1	T	C	12	32	37.5	0.384615	36.7692
chr16	6741038	Deletion	1	G	-	12	32	37.5	0.0833333	32.0833	CDS: g16707, Gene: g16707, mRNA: g16707	g16707:c.768delC	g16707:p.Ile256fs
chr2	1973825	Insertion	1	-	G	18	48	37.5	0.5	36.1111	Gene: Cre02.g088200, Five_prime_utr: PAC:26900676.five_prime_UTR.1, mRNA: Cre02.g088200
chr4	355052	SNV	1	C	T	12	32	37.5	0.0769231	37.1538	Gene: g4542, mRNA: g4542	g4542:c.819-450G>A
chr4	33894	SNV	1	T	C	6	16	37.5	0.333333	35.3333	Gene: g4495, mRNA: g4495	g4495:c.1843+422A>G
chr4	2331081	SNV	1	T	C	12	32	37.5	0.333333	34.125	Gene: Cre04.g220750, mRNA: Cre04.g220750, Three_prime_utr: PAC:26905548.three_prime_UTR.1
chr4	2331082	SNV	1	T	G	12	32	37.5	0.333333	34.125	Gene: Cre04.g220750, mRNA: Cre04.g220750, Three_prime_utr: PAC:26905548.three_prime_UTR.1
chr4	1140873	SNV	1	C	T	12	32	37.5	0.333333	36.8333
chr2	8150807	SNV	1	A	C	134	359	37.3259	0.425532	35.9433	Gene: g2688, mRNA: g2688, mRNA: g2688
chr14	2646299	SNV	1	T	C	25	67	37.3134	0.481481	35.8889	Gene: Cre14.g626300, mRNA: Cre14.g626300, Three_prime_utr: PAC:26890799.three_prime_UTR.1
chr5	46823	SNV	1	C	T	25	67	37.3134	0.36	35
chr12	1686008	SNV	1	T	C	22	59	37.2881	0.478261	34.5217	Gene: Cre12.g485800, mRNA: Cre12.g485800	Cre12.g485800:c.1397-154A>G
chr12	6641923	SNV	1	A	C	22	59	37.2881	0.434783	34.7826
chr15	1450907	Insertion	1	-	T	19	51	37.2549	0.157895	35.5789
chr2	8063453	SNV	1	G	T	38	102	37.2549	0.243902	35.8537	Gene: g2687, Gene: g2688, mRNA: g2687, mRNA: g2687, mRNA: g2687, mRNA: g2688, mRNA: g2688
chr12	911248	Deletion	3	CCG	-	16	43	37.2093	0.3125	26.5625	Gene: g12149, mRNA: g12149	g12149:c.3172+1301_3172+1303delCGG
chr14	2692480	SNV	1	G	C	65	175	37.1429	0.253731	36.0149	Gene: g15090, mRNA: g15090	g15090:c.136+118C>G
chr12	2675704	Deletion	2	CA	-	10	27	37.037	0.4	33.8	Gene: Cre12.g504050, mRNA: Cre12.g504050	Cre12.g504050:c.617-136_617-135delCA
chr12	1001778	SNV	1	C	T	10	27	37.037	0.454545	36.0909	CDS: g12153, Gene: g12153, mRNA: g12153	g12153:c.2722G>A	g12153:p.Ala908Thr
chr15	1466378	SNV	1	G	T	10	27	37.037	0.2	36.3	Gene: g15492, mRNA: g15492	g15492:c.3838-1773G>T
chr8	41585	SNV	1	C	T	10	27	37.037	0.1	35.4
chr6	2221030	SNV	1	A	G	24	65	36.9231	0.333333	35.5185	Gene: g5977, mRNA: g5977
chr11	2378066	SNV	1	G	C	73	199	36.6834	0.342466	36.0822
chr11	2378067	SNV	1	G	A	73	199	36.6834	0.342466	36.0822
chr11	2378069	SNV	1	G	A	73	199	36.6834	0.342466	36.0822
chr11	2692673	Insertion	8	-	CCTCGCAG	11	30	36.6667	0.454545	34.5682
chr15	1409064	SNV	1	C	T	11	30	36.6667	0.0909091	34.5455
chr2	2652434	SNV	1	C	A	11	30	36.6667	0.454545	35.1818
chr2	8323192	SNV	1	G	A	11	30	36.6667	0.0909091	37.5455
chr4	966112	SNV	1	G	A	11	30	36.6667	0.272727	37.7273
chr8	2280260	SNV	1	A	G	11	30	36.6667	0.5	36.6667
scaffold_20	28634	SNV	1	T	C	11	30	36.6667	0.333333	36.1667	CDS: g18154, Gene: g18154, mRNA: g18154	g18154:c.960T>C
chr14	1284284	SNV	1	T	G	15	41	36.5854	0.4375	36.3125	Gene: Cre14.g616650, mRNA: Cre14.g616650, Three_prime_utr: PAC:26891186.three_prime_UTR.2
chr12	1686033	SNV	1	A	G	34	93	36.5591	0.441176	35.8824	Gene: Cre12.g485800, mRNA: Cre12.g485800	Cre12.g485800:c.1396+179T>C
chr11	2378084	SNV	1	C	T	38	104	36.5385	0.35	34.975
chr4	714493	SNV	1	G	T	19	52	36.5385	0.25	35.85
chr1	2629774	Deletion	2	GT	-	8	22	36.3636	0.125	31.875	Gene: Cre01.g015250, mRNA: Cre01.g015250	Cre01.g015250:c.224-80_224-79delAC
chr1	3166442	SNV	1	G	C	8	22	36.3636	0.375	34.25
chr11	2372645	SNV	1	G	A	8	22	36.3636	0	33.625
chr15	1409665	SNV	1	C	G	20	55	36.3636	0.285714	36.8571
chr17	4598746	SNV	1	G	T	16	44	36.3636	0.5	36.9	Gene: g17715, mRNA: g17715	g17715:c.2202-72G>T
chr3	6905736	SNV	1	G	A	16	44	36.3636	0.176471	35.6471	CDS: g4119, Gene: g4119, mRNA: g4119	g4119:c.420G>A
chr6	6862203	SNV	1	T	A	16	44	36.3636	0.5	34.375
chr6	6862205	SNV	1	C	T	16	44	36.3636	0.5	34.375
chr8	347987	SNV	1	G	T	24	66	36.3636	0.458333	35.5	Gene: g8386, mRNA: g8386, Three_prime_utr: PAC:26888474.three_prime_UTR.1
chr8	636141	SNV	1	A	G	8	22	36.3636	0.25	33.875	Gene: Cre08.g359950, mRNA: Cre08.g359950	Cre08.g359950:c.217-73T>C
scaffold_30	12947	SNV	1	C	T	12	33	36.3636	0.4375	36.1875	Gene: g18326, mRNA: g18326	g18326:c.268-76G>A
chr12	9002764	SNV	1	G	T	45	124	36.2903	0.4	36.2444
chr4	811000	SNV	1	C	T	25	69	36.2319	0.24	36.5067	Gene: g4606, mRNA: g4606, Three_prime_utr: PAC:26906172.three_prime_UTR.1
chr4	811001	SNV	1	C	T	25	69	36.2319	0.24	36.5067	Gene: g4606, mRNA: g4606, Three_prime_utr: PAC:26906172.three_prime_UTR.1
chr4	811002	SNV	1	C	T	25	69	36.2319	0.24	36.5067	Gene: g4606, mRNA: g4606, Three_prime_utr: PAC:26906172.three_prime_UTR.1
chr10	1713396	Deletion	1	A	-	17	47	36.1702	0.470588	30.1765	Gene: Cre10.g430450, mRNA: Cre10.g430450	Cre10.g430450:c.993-215delT
chr2	6618483	SNV	1	G	C	13	36	36.1111	0.466667	35.5333
chr14	2132910	SNV	1	C	T	9	25	36	0.333333	34.8889
chr15	1467687	SNV	1	G	C	9	25	36	0.111111	35.4444	Gene: g15492, mRNA: g15492	g15492:c.3838-464G>C
chr15	1403377	SNV	1	G	A	9	25	36	0.1	36.6	Gene: g15489, mRNA: g15489	g15489:c.25+70C>T
chr6	147079	Insertion	5	-	AGTGC	9	25	36	0.444444	36.3333
chr8	3033755	SNV	1	G	T	9	25	36	0	35
scaffold_29	42730	SNV	1	C	T	9	25	36	0	36.7778	Gene: g18323, Three_prime_utr: PAC:26904296.three_prime_UTR.1, mRNA: g18323
chr8	347998	Deletion	1	C	-	23	64	35.9375	0.434783	31.4783	Gene: g8386, mRNA: g8386, Three_prime_utr: PAC:26888474.three_prime_UTR.1
chr16	4037984	SNV	1	G	A	19	53	35.8491	0.473684	36.3684	CDS: g16226, Gene: g16226, mRNA: g16226	g16226:c.2350G>A	g16226:p.Gly784Asn
chr16	4037985	SNV	1	G	A	19	53	35.8491	0.473684	36.3684	CDS: g16226, Gene: g16226, mRNA: g16226	g16226:c.2351G>A	g16226:p.Gly784Asn
chr10	6533841	SNV	1	T	G	15	42	35.7143	0.4	35.7333	Gene: Cre10.g466900, Five_prime_utr: PAC:26905328.five_prime_UTR.1, mRNA: Cre10.g466900
chr12	151099	SNV	1	A	G	55	154	35.7143	0.189655	36.6897	Gene: Cre12.g484450, Five_prime_utr: PAC:26906549.five_prime_UTR.1, mRNA: Cre12.g484450
chr16	670492	SNV	1	A	C	10	28	35.7143	0.1	38.3
chr17	984874	SNV	1	C	T	15	42	35.7143	0.4375	36.625
chr2	1937575	Insertion	2	-	TG	20	56	35.7143	0.5	36.3	Gene: Cre02.g087900, mRNA: Cre02.g087900	Cre02.g087900:c.1148-150_1148-149insCA
chr2	9005634	SNV	1	T	C	25	70	35.7143	0.384615	35.3462
chr3	8352708	Insertion	1	-	C	10	28	35.7143	0.4	35.8	Gene: Cre03.g198800, Five_prime_utr: PAC:26902141.five_prime_UTR.1, mRNA: Cre03.g198800
chr4	2535295	SNV	1	C	T	10	28	35.7143	0.272727	33.8182	CDS: Cre04.g222250, Gene: Cre04.g222250, mRNA: Cre04.g222250	Cre04.g222250:c.1214G>A	Cre04.g222250:p.Arg405His
chr5	2076239	SNV	1	G	A	10	28	35.7143	0.4	35.1	Gene: Cre05.g234600, mRNA: Cre05.g234600	Cre05.g234600:c.3036+86C>T
chr9	5457307	SNV	1	C	T	10	28	35.7143	0	38.2	CDS: g9954, Gene: g9954, mRNA: g9954	g9954:c.59C>T	g9954:p.Thr20Ile
chr6	3510853	SNV	1	A	T	16	45	35.5556	0.1875	35.875
chr17	4287326	Deletion	1	T	-	38	107	35.514	0.421053	31.0526
chr15	1816611	SNV	1	G	A	33	93	35.4839	0.268293	36.8049
chr16	670402	Deletion	1	C	-	11	31	35.4839	0.272727	34.0909
chr6	6907187	SNV	1	T	C	11	31	35.4839	0	37.0909	CDS: g6845, Gene: g6845, mRNA: g6845	g6845:c.1476T>C
scaffold_20	28605	SNV	1	G	A	11	31	35.4839	0.25	36.5833	CDS: g18154, Gene: g18154, mRNA: g18154	g18154:c.931G>A	g18154:p.Ala311Thr
chr1	5875353	SNV	1	A	G	23	65	35.3846	0.26087	35.1739	Gene: Cre01.g041900, mRNA: Cre01.g041900, Three_prime_utr: PAC:26902996.three_prime_UTR.1
chr5	162387	SNV	1	G	A	37	105	35.2381	0.108108	37.3514	Gene: g5084, mRNA: g5084, Three_prime_utr: PAC:26897863.three_prime_UTR.1
chr8	4791848	SNV	1	G	C	25	71	35.2113	0.269231	37.6538	Gene: g9045, mRNA: g9045, mRNA: g9045	g9045:c.[872+616G>C];[872+616G>C]
chr17	3136343	SNV	1	T	C	13	37	35.1351	0.153846	35	Gene: Cre17.g721550, Gene: g17457, mRNA: Cre17.g721550, mRNA: g17457	Cre17.g721550:c.[118-131A>G]; g17457:c.[118-131A>G]
chr2	2614	SNV	1	T	C	52	148	35.1351	0.462963	36.2778
chr8	3050642	SNV	1	G	A	52	148	35.1351	0.25	35.3214	CDS: g8779, Gene: g8779, mRNA: g8779	g8779:c.1638G>A
scaffold_20	28522	SNV	1	C	T	13	37	35.1351	0.357143	36.8571	CDS: g18154, Gene: g18154, mRNA: g18154	g18154:c.848C>T	g18154:p.Thr283Met
chr15	1423972	SNV	1	C	T	7	20	35	0.428571	37.1429
chr16	890918	Insertion	4	-	GCAA	7	20	35	0.285714	34.6071	Gene: Cre16.g648200, Gene: g15688, mRNA: Cre16.g648200, mRNA: g15688	Cre16.g648200:c.[807+372_807+373insTTGC]; g15688:c.[807+372_807+373insTTGC]
chr16	3282204	SNV	1	C	G	7	20	35	0	35.7143
chr16	3933737	SNV	1	C	A	7	20	35	0.285714	38.5
chr17	7188044	SNV	1	G	T	14	40	35	0.142857	38.1429
chr2	8000375	Deletion	6	GTGTGT	-	7	20	35	0.285714	37.7143	Gene: g2679, mRNA: g2679	g2679:c.305+59_305+64delACACAC
chr2	6629723	SNV	1	C	A	7	20	35	0.428571	36
chr5	274652	SNV	1	T	G	7	20	35	0	36.5714
chr5	274654	SNV	1	T	C	7	20	35	0	36.5714
chr6	805283	SNV	1	G	C	7	20	35	0.142857	33.4286
scaffold_21	173380	SNV	1	G	A	7	20	35	0	36.4286
chr3	8415410	SNV	1	C	G	44	126	34.9206	0.25	34.8409	Gene: g4359, Five_prime_utr: PAC:26902533.five_prime_UTR.1, mRNA: g4359
chr4	737888	SNV	1	G	T	15	43	34.8837	0.333333	35.2667
chr12	1686043	SNV	1	A	G	31	89	34.8315	0.451613	35.9355	Gene: Cre12.g485800, mRNA: Cre12.g485800	Cre12.g485800:c.1396+169T>C
chr1	5875356	SNV	1	A	G	24	69	34.7826	0.28	36.6	Gene: Cre01.g041900, mRNA: Cre01.g041900, Three_prime_utr: PAC:26902996.three_prime_UTR.1
chr1	990169	SNV	1	A	C	8	23	34.7826	0	36.25
chr11	2627717	SNV	1	G	A	8	23	34.7826	0	37.125	Gene: Cre11.g476400, mRNA: Cre11.g476400	Cre11.g476400:c.1006-394C>T
chr17	3136274	Insertion	1	-	A	8	23	34.7826	0.375	35.625	Gene: Cre17.g721550, Gene: g17457, mRNA: Cre17.g721550, mRNA: g17457	Cre17.g721550:c.[118-62_118-61insT]; g17457:c.[118-62_118-61insT]
chr3	2192012	SNV	1	C	G	8	23	34.7826	0.5	34.125
chr6	6862244	Deletion	2	CG	-	16	46	34.7826	0.3125	31.25
chr7	2605613	SNV	1	G	C	8	23	34.7826	0.25	35.125
chr14	522231	SNV	1	A	G	65	187	34.7594	0.476923	35.7077	Gene: Cre14.g611450, mRNA: Cre14.g611450, Three_prime_utr: PAC:26890822.three_prime_UTR.1
chr6	6862238	Deletion	1	A	-	17	49	34.6939	0.411765	31.1176
chr8	3091785	SNV	1	C	T	9	26	34.6154	0	37.7778
chr8	3091786	SNV	1	C	T	9	26	34.6154	0	37.7778
chr10	3601870	Deletion	1	T	-	10	29	34.4828	0.1	37.8
chr13	4263893	SNV	1	C	G	10	29	34.4828	0	37.2
chr14	2646304	SNV	1	T	A	20	58	34.4828	0.5	36.225	Gene: Cre14.g626300, mRNA: Cre14.g626300, Three_prime_utr: PAC:26890799.three_prime_UTR.1
chr14	2646306	SNV	1	A	T	20	58	34.4828	0.5	36.225	Gene: Cre14.g626300, mRNA: Cre14.g626300, Three_prime_utr: PAC:26890799.three_prime_UTR.1
chr15	1813759	SNV	1	T	C	10	29	34.4828	0.3	34.6
chr1	990292	SNV	1	T	G	11	32	34.375	0.454545	36.0909
chr15	1820574	Insertion	1	-	T	11	32	34.375	0.0909091	33.6364
chr16	3944358	SNV	1	C	T	12	35	34.2857	0.25	34.9167	Gene: g16214, mRNA: g16214	g16214:c.416+667C>T
chr15	1909992	SNV	1	C	A	25	73	34.2466	0.192308	35.9615
scaffold_22	122635	Deletion	1	C	-	26	76	34.2105	0.153846	34.8846
chr12	901545	SNV	1	G	A	30	88	34.0909	0.419355	35.129	Gene: g12148, mRNA: g12148, Three_prime_utr: PAC:26907483.three_prime_UTR.1
chr10	6573173	SNV	1	A	T	31	91	34.0659	0.451613	35.5484
chr2	8536683	SNV	1	G	A	16	47	34.0426	0.375	35.875	Gene: g2737, mRNA: g2737, Three_prime_utr: PAC:26900493.three_prime_UTR.1
chr10	1073863	SNV	1	G	C	17	50	34	0.0588235	37.3529	Gene: Cre10.g425300, mRNA: Cre10.g425300	Cre10.g425300:c.463+45C>G
chr17	7088716	SNV	1	A	G	17	50	34	0.411765	32.5882
chr8	347994	SNV	1	C	G	17	50	34	0.176471	36.2353	Gene: g8386, mRNA: g8386, Three_prime_utr: PAC:26888474.three_prime_UTR.1
chr4	458850	SNV	1	A	T	18	53	33.9623	0.388889	35.8889	Gene: g4556, mRNA: g4556	g4556:c.864+112A>T
chr9	2355990	Deletion	3	GCG	-	96	283	33.9223	0.447917	33.5208	Gene: Cre09.g392000, Gene: g9452, Five_prime_utr: PAC:26895953.five_prime_UTR.1, Five_prime_utr: PAC:26895952.five_prime_UTR.1, mRNA: Cre09.g392000, mRNA: g9452
chr11	92479	SNV	1	G	A	21	62	33.871	0.333333	36.8095	Gene: g11464, mRNA: g11464, Three_prime_utr: PAC:26890493.three_prime_UTR.1
chr14	2646323	SNV	1	A	T	22	65	33.8462	0.434783	34.8261	Gene: Cre14.g626300, mRNA: Cre14.g626300, Three_prime_utr: PAC:26890799.three_prime_UTR.1
chr16	4038253	SNV	1	T	C	25	74	33.7838	0.04	36.84	Gene: g16226, mRNA: g16226	g16226:c.2422-129T>C
chr10	3540152	SNV	1	G	A	16	48	33.3333	0.294118	36.9412
chr11	715633	SNV	1	T	C	7	21	33.3333	0.142857	36.8571	Gene: g11558, Five_prime_utr: PAC:26890436.five_prime_UTR.1, mRNA: g11558
chr11	92339	SNV	1	C	T	9	27	33.3333	0.333333	35.5
chr11	429915	SNV	1	T	G	9	27	33.3333	0	36.7778
chr12	6641919	SNV	1	A	C	18	54	33.3333	0.421053	36.6842
chr13	4984002	Deletion	3	CTG	-	8	24	33.3333	0.5	36.375	Gene: Cre13.g606550, mRNA: Cre13.g606550	Cre13.g606550:c.847+73_847+75delCTG
chr13	16330	SNV	1	A	G	7	21	33.3333	0	33.1429	Gene: Cre13.g561800, mRNA: Cre13.g561800	Cre13.g561800:c.2661-218T>C
chr14	1171805	SNV	1	G	T	8	24	33.3333	0.125	36.125	Gene: g14837, mRNA: g14837	g14837:c.2410-705C>A
chr14	674297	SNV	1	G	T	7	21	33.3333	0.285714	36.2857
chr15	1463640	SNV	1	C	T	7	21	33.3333	0.285714	35.4286	Gene: g15492, mRNA: g15492	g15492:c.3837+3428C>T
chr15	491062	SNV	1	A	G	14	42	33.3333	0.428571	35.5714	Gene: g15357, mRNA: g15357	g15357:c.1615-244T>C
chr15	107907	SNV	1	C	T	7	21	33.3333	0.428571	34.5714	CDS: g15309, Gene: g15309, mRNA: g15309	g15309:c.378G>A
chr15	1419261	SNV	1	G	T	14	42	33.3333	0.357143	37.5
chr15	1419262	SNV	1	T	C	14	42	33.3333	0.357143	37.5
chr15	1424053	SNV	1	C	T	7	21	33.3333	0.285714	34.1429
chr16	6975875	SNV	1	C	A	9	27	33.3333	0.444444	35	Gene: g16748, mRNA: g16748, Three_prime_utr: PAC:26891848.three_prime_UTR.1
chr16	6975887	SNV	1	C	T	8	24	33.3333	0.5	36.375	Gene: g16748, mRNA: g16748, Three_prime_utr: PAC:26891848.three_prime_UTR.1
chr16	3282225	SNV	1	T	G	7	21	33.3333	0	36.8571
chr17	3575122	Deletion	3	CAA	-	9	27	33.3333	0.111111	29.1111	Gene: Cre17.g725600, mRNA: Cre17.g725600	Cre17.g725600:c.1241+7_1241+9delTTG
chr17	4974230	SNV	1	C	T	13	39	33.3333	0.5	34.2143
chr3	6949937	SNV	1	A	T	48	144	33.3333	0.0980392	37.7059
chr3	6955044	SNV	1	G	A	12	36	33.3333	0.0833333	36.0833
chr4	3660855	Insertion	6	-	GGCGGC	8	24	33.3333	0.375	35.9792	CDS: Cre04.g228850, Gene: Cre04.g228850, mRNA: Cre04.g228850	Cre04.g228850:c.1682_1683insGGCGGC	Cre04.g228850:p.Ala561delinsAlaAlaAla
chr4	714238	SNV	1	T	A	11	33	33.3333	0.181818	37.7273
chr6	6373957	SNV	1	G	A	32	96	33.3333	0.46875	35.0625	Gene: g6770, mRNA: g6770, Three_prime_utr: PAC:26894131.three_prime_UTR.1
chr6	3510868	SNV	1	C	T	11	33	33.3333	0.166667	37
chr7	4385729	SNV	1	C	G	8	24	33.3333	0.375	37.375	CDS: Cre07.g341100, CDS: g7973, Gene: Cre07.g341100, Gene: g7973, mRNA: Cre07.g341100, mRNA: g7973	Cre07.g341100:c.[179C>G]; g7973:c.[179C>G]	Cre07.g341100:p.[Thr60Ser]; g7973:p.[Thr60Ser]
chr8	4750497	SNV	1	G	A	12	36	33.3333	0.416667	35.7917	Gene: g9044, mRNA: g9044, mRNA: g9044
chr8	1314027	SNV	1	G	A	7	21	33.3333	0.285714	37.5714	Gene: g8521, mRNA: g8521	g8521:c.4534+432G>A
chr8	3069311	SNV	1	G	T	22	66	33.3333	0.136364	36.3182
scaffold_22	123822	Deletion	1	C	-	9	27	33.3333	0.444444	29.6667
scaffold_23	19311	SNV	1	C	A	8	24	33.3333	0.454545	36.8182	Gene: g18231, mRNA: g18231, Three_prime_utr: PAC:26888778.three_prime_UTR.1
scaffold_44	4699	SNV	1	C	T	23	69	33.3333	0.391304	37.7391	Gene: g18392, Three_prime_utr: PAC:26892952.three_prime_UTR.1, mRNA: g18392
chr3	8400293	SNV	1	A	C	573	1738	32.9689	0.26087	35.7252
chr10	5784751	SNV	1	C	G	29	88	32.9545	0.482759	33.6207	Gene: g11310, mRNA: g11310, Three_prime_utr: PAC:26904797.three_prime_UTR.1
chr2	2656	SNV	1	G	C	45	137	32.8467	0.444444	36.1556
chr15	490444	SNV	1	C	T	22	67	32.8358	0.272727	36.9091	Gene: g15357, mRNA: g15357, Three_prime_utr: PAC:26898114.three_prime_UTR.1
scaffold_22	123399	SNV	1	G	C	20	61	32.7869	0.05	32.55
chr4	1075849	SNV	1	G	A	19	58	32.7586	0.315789	36.3158	Gene: Cre04.g216300, mRNA: Cre04.g216300	Cre04.g216300:c.334+491G>A
chr15	489219	Insertion	2	-	GA	18	55	32.7273	0.333333	34.4167	Gene: Cre15.g636650, mRNA: Cre15.g636650, Three_prime_utr: PAC:26898241.three_prime_UTR.1
chr15	1409636	SNV	1	A	G	17	52	32.6923	0.166667	37.2778
chr15	489230	SNV	1	G	T	16	49	32.6531	0.4375	34.25	Gene: Cre15.g636650, mRNA: Cre15.g636650, Three_prime_utr: PAC:26898241.three_prime_UTR.1
chr10	5784743	SNV	1	G	C	31	95	32.6316	0.483871	33.5161	Gene: g11310, mRNA: g11310, Three_prime_utr: PAC:26904797.three_prime_UTR.1
chr6	6710655	SNV	1	G	A	15	46	32.6087	0.133333	37.5333	CDS: g6814, Gene: g6814, mRNA: g6814	g6814:c.7623C>T
scaffold_38	23032	SNV	1	T	C	15	46	32.6087	0.466667	37.2667
chr11	3752583	SNV	1	T	G	28	86	32.5581	0.142857	36.6429
chr4	212871	SNV	1	G	T	12	37	32.4324	0.166667	37.0833
chr17	3573886	SNV	1	A	G	31	96	32.2917	0.451613	35.2581	Gene: Cre17.g725600, mRNA: Cre17.g725600
chr14	2646112	SNV	1	T	C	10	31	32.2581	0.2	36.2	Gene: Cre14.g626300, mRNA: Cre14.g626300, Three_prime_utr: PAC:26890799.three_prime_UTR.1
chr6	2845815	SNV	1	A	T	40	124	32.2581	0.225	34.825	Gene: Cre06.g271800, Gene: g6099, mRNA: Cre06.g271800, mRNA: g6099, Three_prime_utr: PAC:26892966.three_prime_UTR.2, Three_prime_utr: PAC:26892965.three_prime_UTR.1
chr9	319787	SNV	1	T	C	10	31	32.2581	0.25	35.4167
chr6	6373969	SNV	1	A	G	29	90	32.2222	0.448276	33.8621	Gene: g6770, mRNA: g6770, Three_prime_utr: PAC:26894131.three_prime_UTR.1
chr9	2355928	SNV	1	G	A	92	286	32.1678	0.489583	36.5833
chr11	3752579	SNV	1	T	A	55	171	32.1637	0.254545	36.1273
chr13	709	SNV	1	A	G	9	28	32.1429	0.333333	36.8889
chr2	8200642	Deletion	1	C	-	27	84	32.1429	0.333333	32.963	Gene: g2693, mRNA: g2693, Three_prime_utr: PAC:26900314.three_prime_UTR.1
chr6	490400	SNV	1	A	C	9	28	32.1429	0.444444	34.3333
chr7	1805781	SNV	1	G	T	9	28	32.1429	0	37.2222
chr7	1805782	SNV	1	A	T	9	28	32.1429	0	37.2222
chr8	4228629	SNV	1	T	G	9	28	32.1429	0.333333	37.2222	Gene: Cre08.g380550, mRNA: Cre08.g380550	Cre08.g380550:c.1261-83T>G
scaffold_22	122194	Deletion	1	C	-	18	56	32.1429	0.388889	31.9444
scaffold_23	83514	SNV	1	C	T	9	28	32.1429	0.444444	35.2222
chr17	4849782	Insertion	1	-	A	17	53	32.0755	0.294118	36.5882	Gene: g17748, Gene: g17749, Five_prime_utr: PAC:26896380.five_prime_UTR.1, mRNA: g17748, mRNA: g17749, Three_prime_utr: PAC:26896832.three_prime_UTR.1
chr12	1007146	SNV	1	A	G	32	100	32	0.46875	35.1875	Gene: g12153, mRNA: g12153	g12153:c.61-40T>C
chr15	107812	SNV	1	A	G	8	25	32	0.375	37.125	Gene: g15309, mRNA: g15309, Three_prime_utr: PAC:26898347.three_prime_UTR.1
chr16	3933730	SNV	1	G	A	8	25	32	0.25	38
chr17	984019	SNV	1	G	A	8	25	32	0.25	37.125	CDS: g17047, Gene: g17047, mRNA: g17047	g17047:c.106C>T	g17047:p.Pro36Ser
chr17	984021	SNV	1	C	T	8	25	32	0.25	37.125	CDS: g17047, Gene: g17047, mRNA: g17047	g17047:c.104G>A	g17047:p.Ser35Asn
chr2	3059535	SNV	1	G	A	8	25	32	0.375	35.25	Gene: g1822, Five_prime_utr: PAC:26899530.five_prime_UTR.1, mRNA: g1822
chr3	3501316	SNV	1	G	A	8	25	32	0.25	35.25	Gene: g3444, mRNA: g3444, Three_prime_utr: PAC:26902850.three_prime_UTR.1
chr3	7139724	SNV	1	C	T	8	25	32	0.125	38.25
chr4	1140669	SNV	1	C	T	24	75	32	0.08	36.04
chr5	2862559	Insertion	7	-	TTAGGCC	8	25	32	0.5	37.2321	CDS: g5474, Gene: g5474, mRNA: g5474	g5474:c.252_253insTTAGGCC	g5474:p.Arg85fs
chr9	48716	Deletion	1	G	-	15	47	31.9149	0.0666667	32.8667
chr14	522255	SNV	1	A	G	59	185	31.8919	0.389831	35.0508	Gene: Cre14.g611450, mRNA: Cre14.g611450, Three_prime_utr: PAC:26890822.three_prime_UTR.1
chr1	990150	Insertion	1	-	T	7	22	31.8182	0	36.2857
chr11	3213784	Deletion	1	C	-	7	22	31.8182	0.428571	34.7143
chr14	674293	SNV	1	C	T	7	22	31.8182	0.285714	36
chr15	1465793	SNV	1	C	G	7	22	31.8182	0.285714	37.2857	Gene: g15492, mRNA: g15492	g15492:c.3838-2358C>G
chr15	248626	Deletion	1	C	-	7	22	31.8182	0.428571	32.2857	Gene: Cre15.g640800, mRNA: Cre15.g640800, Three_prime_utr: PAC:26898121.three_prime_UTR.2
chr16	6975890	SNV	1	A	C	7	22	31.8182	0.428571	37.4286	Gene: g16748, mRNA: g16748, Three_prime_utr: PAC:26891848.three_prime_UTR.1
chr2	3059556	SNV	1	G	T	7	22	31.8182	0.428571	34.4286	Gene: g1822, Five_prime_utr: PAC:26899530.five_prime_UTR.1, mRNA: g1822
chr4	33922	SNV	1	T	C	7	22	31.8182	0.142857	38.7143	Gene: g4495, mRNA: g4495	g4495:c.1843+394A>G
chr5	18383	SNV	1	G	T	7	22	31.8182	0.428571	35	CDS: g5076, CDS: g5076, Gene: g5076, mRNA: g5076, mRNA: g5076	g5076:c.[462C>A];[3129C>A]
chr6	4567980	SNV	1	G	A	7	22	31.8182	0.375	35.5
chr8	1314033	SNV	1	C	T	7	22	31.8182	0.285714	37	Gene: g8521, mRNA: g8521	g8521:c.4534+438C>T
scaffold_31	9901	SNV	1	A	T	7	22	31.8182	0.285714	35.2857
scaffold_44	3426	SNV	1	G	A	7	22	31.8182	0.375	37.125
chr12	907718	SNV	1	T	C	40	126	31.746	0.238095	37.2143	Gene: g12149, mRNA: g12149	g12149:c.3698-9A>G
chr15	1753002	SNV	1	G	A	20	63	31.746	0.25	35.85
chr5	1267345	SNV	1	G	T	40	126	31.746	0.45	33.1	Gene: g5228, Five_prime_utr: PAC:26897727.five_prime_UTR.1, Five_prime_utr: PAC:26897728.five_prime_UTR.1, mRNA: g5228, mRNA: g5228
chr7	3550058	SNV	1	A	G	20	63	31.746	0.4	36.35
chr15	1753840	SNV	1	A	G	26	82	31.7073	0.392857	35.3571
chr15	489220	Insertion	1	-	G	18	57	31.5789	0.333333	36.1667	Gene: Cre15.g636650, mRNA: Cre15.g636650, Three_prime_utr: PAC:26898241.three_prime_UTR.1
chr15	1588441	SNV	1	T	C	12	38	31.5789	0.333333	37.4167
chr10	3455170	Deletion	10	CGCGTGTAAC	-	23	73	31.5068	0.217391	35.9565	Gene: g10934, Five_prime_utr: PAC:26904952.five_prime_UTR.1, mRNA: g10934
chr14	2086733	Deletion	4	ACAT	-	11	35	31.4286	0.454545	34.7273
chr15	1455484	SNV	1	T	C	11	35	31.4286	0.25	36.0833	Gene: g15491, Five_prime_utr: PAC:26898349.five_prime_UTR.1, mRNA: g15491
chr4	861304	SNV	1	A	C	11	35	31.4286	0.333333	36.1667	CDS: g4616, Gene: g4616, mRNA: g4616	g4616:c.141A>C
chr8	2280252	SNV	1	T	A	11	35	31.4286	0.454545	37.2727
chr8	2280253	SNV	1	T	C	11	35	31.4286	0.454545	37.2727
chr10	4953475	SNV	1	C	A	16	51	31.3725	0	37.375
chr10	5784737	SNV	1	T	G	31	99	31.3131	0.451613	33.6452	Gene: g11310, mRNA: g11310, Three_prime_utr: PAC:26904797.three_prime_UTR.1
chr12	654828	SNV	1	C	A	15	48	31.25	0.25	36.8125	Gene: g12111, mRNA: g12111	g12111:c.1211+240G>T
chr6	4041259	SNV	1	C	T	5	16	31.25	0	37.6	Gene: g6350, mRNA: g6350	g6350:c.402+138C>T
chr6	4041261	SNV	1	C	T	5	16	31.25	0	37.6	Gene: g6350, mRNA: g6350	g6350:c.402+140C>T
chr7	3550054	SNV	1	C	A	20	64	31.25	0.45	36
chr4	1140887	SNV	1	C	T	9	29	31.0345	0.5	37.1
scaffold_20	28628	SNV	1	G	A	9	29	31.0345	0.222222	37.7778	CDS: g18154, Gene: g18154, mRNA: g18154	g18154:c.954G>A
scaffold_22	122137	SNV	1	A	C	9	29	31.0345	0.2	38.3
scaffold_40	22059	SNV	1	T	C	9	29	31.0345	0	38.7778
chr3	821039	SNV	1	C	A	35	113	30.9735	0.0571429	35.1429	Gene: g2986, mRNA: g2986, Three_prime_utr: PAC:26902284.three_prime_UTR.1
chr9	324472	SNV	1	C	A	48	155	30.9677	0.145833	34.8333
chr15	491066	SNV	1	A	C	13	42	30.9524	0.384615	35.7692	Gene: g15357, mRNA: g15357	g15357:c.1615-248T>G
chr4	2335371	SNV	1	A	T	17	55	30.9091	0	37.2941	Gene: Cre04.g220751, mRNA: Cre04.g220751, Three_prime_utr: PAC:26905963.three_prime_UTR.1
scaffold_44	4675	SNV	1	T	C	21	68	30.8824	0.5	37.2727	Gene: g18392, Three_prime_utr: PAC:26892952.three_prime_UTR.1, mRNA: g18392
chr11	448891	SNV	1	A	G	8	26	30.7692	0.333333	36.6667	CDS: g11519, Gene: g11519, mRNA: g11519	g11519:c.1938T>C
chr13	2685267	SNV	1	C	T	8	26	30.7692	0.125	38.5	Gene: g14290, mRNA: g14290	g14290:c.8-412G>A
chr14	1284275	Deletion	4	GCCC	-	12	39	30.7692	0.333333	30.5	Gene: Cre14.g616650, mRNA: Cre14.g616650, Three_prime_utr: PAC:26891186.three_prime_UTR.2
chr16	4147862	SNV	1	G	C	12	39	30.7692	0.416667	36.0833	CDS: g16253, CDS: g16253, CDS: g16253, Gene: g16253, mRNA: g16253, mRNA: g16253, mRNA: g16253	g16253:c.[150G>C];[150G>C];[150G>C]
chr16	670334	SNV	1	C	A	12	39	30.7692	0.333333	38.6667
chr2	6172009	SNV	1	A	T	8	26	30.7692	0.5	33.125	Gene: Cre02.g113700, mRNA: Cre02.g113700, Three_prime_utr: PAC:26899975.three_prime_UTR.1
chr2	5660005	Deletion	1	T	-	8	26	30.7692	0	37.375	Gene: Cre02.g109650, mRNA: Cre02.g109650, Three_prime_utr: PAC:26901052.three_prime_UTR.1
chr2	8979489	SNV	1	G	A	12	39	30.7692	0.230769	34.9231	CDS: g2806, Gene: g2806, mRNA: g2806	g2806:c.1541C>T	g2806:p.Ala514Val
chr2	2662	SNV	1	T	C	32	104	30.7692	0.40625	35.4375
chr3	5074	SNV	1	C	T	8	26	30.7692	0.25	37.5
chr3	5075	SNV	1	C	T	8	26	30.7692	0.25	37.5
chr4	741760	SNV	1	T	G	12	39	30.7692	0.25	34.9167	CDS: g4593, Gene: g4593, mRNA: g4593	g4593:c.36T>G
chr4	2563650	SNV	1	G	A	12	39	30.7692	0.416667	33.3333
chr6	4720709	SNV	1	G	A	8	26	30.7692	0.25	38
scaffold_22	20654	Insertion	1	-	G	12	39	30.7692	0.166667	35.5833
scaffold_22	20655	Insertion	1	-	G	12	39	30.7692	0.166667	35.9167
chr12	5799869	SNV	1	C	T	23	75	30.6667	0.0869565	35.7826
chr16	4037975	SNV	1	G	T	19	62	30.6452	0.421053	37.1053	CDS: g16226, Gene: g16226, mRNA: g16226	g16226:c.2341G>T	g16226:p.Val781Leu
chr10	6573176	Insertion	1	-	T	30	98	30.6122	0.466667	35.4667
chr12	901509	SNV	1	A	G	22	72	30.5556	0.478261	36.3913	Gene: g12148, mRNA: g12148, Three_prime_utr: PAC:26907483.three_prime_UTR.1
chr12	6762220	SNV	1	A	T	11	36	30.5556	0.181818	35.6364
chr15	1412577	SNV	1	T	G	11	36	30.5556	0.454545	36.4545
chr15	1412578	SNV	1	C	A	11	36	30.5556	0.454545	36.4545
chr15	1753575	SNV	1	G	A	11	36	30.5556	0.363636	37.0909
chr4	3873176	SNV	1	A	G	11	36	30.5556	0.272727	37.1364	Gene: g5041, mRNA: g5041, Three_prime_utr: PAC:26906141.three_prime_UTR.1
chr4	3873177	SNV	1	A	G	11	36	30.5556	0.272727	37.1364	Gene: g5041, mRNA: g5041, Three_prime_utr: PAC:26906141.three_prime_UTR.1
chr4	458803	SNV	1	G	A	11	36	30.5556	0.454545	35.3636	Gene: g4556, mRNA: g4556	g4556:c.864+65G>A
scaffold_22	122564	Deletion	1	A	-	79	259	30.5019	0.202532	34.8101
scaffold_39	22168	SNV	1	A	G	132	433	30.485	0.0814815	36.7407
chr14	3540281	SNV	1	C	A	7	23	30.4348	0	36.7143	Gene: g15203, mRNA: g15203, mRNA: g15203	g15203:c.[574-247G>T];[637-247G>T]
chr16	4668059	Deletion	4	TGTG	-	7	23	30.4348	0.285714	37.5714	Gene: Cre16.g687350, mRNA: Cre16.g687350	Cre16.g687350:c.420-84_420-81delCACA
chr16	891021	SNV	1	C	G	7	23	30.4348	0.142857	34.2857	Gene: Cre16.g648200, Gene: g15688, mRNA: Cre16.g648200, mRNA: g15688	Cre16.g648200:c.[807+269G>C]; g15688:c.[807+269G>C]
chr17	969784	SNV	1	C	T	7	23	30.4348	0	37.1429
chr2	8197624	SNV	1	A	G	7	23	30.4348	0.428571	37	CDS: g2692, Gene: g2692, mRNA: g2692	g2692:c.1462T>C	g2692:p.Phe488Leu
chr3	6131512	Deletion	1	T	-	7	23	30.4348	0.285714	31
chr3	6934563	SNV	1	G	C	14	46	30.4348	0.214286	34.0714
chr4	1965753	Deletion	1	C	-	7	23	30.4348	0.428571	28.5714	Gene: Cre04.g218500, mRNA: Cre04.g218500	Cre04.g218500:c.1063-149delG
chr4	794949	SNV	1	C	T	42	138	30.4348	0.5	35.1591
chr5	2395389	SNV	1	A	T	7	23	30.4348	0.375	35.75
scaffold_27	15905	Deletion	1	A	-	7	23	30.4348	0	35.2857	Gene: g18301, Five_prime_utr: PAC:26901090.five_prime_UTR.1, mRNA: g18301
chr15	1636498	SNV	1	C	A	48	158	30.3797	0.5	34.8958
chr16	3428518	SNV	1	G	A	24	79	30.3797	0.333333	34.8519
chr2	8192864	SNV	1	T	C	17	56	30.3571	0.235294	36.5294
chr6	6862425	SNV	1	T	G	17	56	30.3571	0.352941	33.6471
chr12	907736	SNV	1	C	T	44	145	30.3448	0.276596	35.0851	Gene: g12149, mRNA: g12149	g12149:c.3698-27G>A
chr14	2692507	Deletion	1	T	-	115	379	30.343	0.33913	31.8435	Gene: g15090, mRNA: g15090	g15090:c.136+91delA
chr12	6579451	SNV	1	G	C	10	33	30.303	0.5	36.3
chr15	489243	SNV	1	G	T	10	33	30.303	0.4	35.9	Gene: Cre15.g636650, mRNA: Cre15.g636650, Three_prime_utr: PAC:26898241.three_prime_UTR.1
chr15	489244	SNV	1	G	T	10	33	30.303	0.4	35.9	Gene: Cre15.g636650, mRNA: Cre15.g636650, Three_prime_utr: PAC:26898241.three_prime_UTR.1
chr16	6741125	SNV	1	G	A	10	33	30.303	0.2	35.05	CDS: g16707, Gene: g16707, mRNA: g16707	g16707:c.681C>T
chr16	6741124	SNV	1	C	T	10	33	30.303	0.2	35.05	CDS: g16707, Gene: g16707, mRNA: g16707	g16707:c.682G>A	g16707:p.Glu228Lys
chr4	2331072	Deletion	3	AGC	-	10	33	30.303	0.5	33.9	Gene: Cre04.g220750, mRNA: Cre04.g220750, Three_prime_utr: PAC:26905548.three_prime_UTR.1
chr6	4722539	SNV	1	A	G	10	33	30.303	0.4	38
chr7	4494488	SNV	1	G	A	13	43	30.2326	0.5	35.9286	Gene: g7988, mRNA: g7988	g7988:c.237+378G>A
chr8	40490	Deletion	1	C	-	13	43	30.2326	0.461538	29.9231	Gene: Cre08.g358459, mRNA: Cre08.g358459, Three_prime_utr: PAC:26887941.three_prime_UTR.1
chr8	3070645	SNV	1	C	T	16	53	30.1887	0.0625	37.8333
chr8	3070646	SNV	1	T	A	16	53	30.1887	0.0625	37.8333
chr1	7189064	SNV	1	A	G	9	30	30	0	35.8889
chr11	505481	SNV	1	G	A	6	20	30	0	35.1667	Gene: g11527, mRNA: g11527	g11527:c.700-109C>T
chr12	686494	SNV	1	G	C	12	40	30	0.166667	35.6667	Gene: g12114, mRNA: g12114	g12114:c.19-64C>G
chr13	4297293	Deletion	1	G	-	6	20	30	0	35.6667	Gene: g14536, mRNA: g14536	g14536:c.2198-259delG
chr13	4459187	SNV	1	C	G	9	30	30	0.222222	36.7778	CDS: Cre13.g603450, Gene: Cre13.g603450, mRNA: Cre13.g603450	Cre13.g603450:c.46C>G	Cre13.g603450:p.Pro16Ala
chr14	2646318	SNV	1	C	A	21	70	30	0.409091	35.8636	Gene: Cre14.g626300, mRNA: Cre14.g626300, Three_prime_utr: PAC:26890799.three_prime_UTR.1
chr15	247256	SNV	1	A	C	27	90	30	0.285714	35
chr15	1450871	SNV	1	C	T	6	20	30	0.166667	37.5
chr17	6341561	SNV	1	G	T	6	20	30	0	36.6667	Gene: g17970, mRNA: g17970	g17970:c.32-37G>T
chr17	4961955	SNV	1	T	G	6	20	30	0.166667	32.5	Gene: g17770, mRNA: g17770	g17770:c.657+284T>G
chr17	973502	SNV	1	A	G	12	40	30	0.153846	36.6923	CDS: g17045, Gene: g17045, mRNA: g17045	g17045:c.164A>G	g17045:p.His55Arg
chr2	3059521	SNV	1	G	A	6	20	30	0.333333	35	Gene: g1822, Five_prime_utr: PAC:26899530.five_prime_UTR.1, mRNA: g1822
chr2	2641873	SNV	1	G	A	9	30	30	0.222222	36.8889	Gene: g1755, mRNA: g1755	g1755:c.1204+127G>A
chr2	8197726	SNV	1	T	G	6	20	30	0.333333	35.8333	CDS: g2692, Gene: g2692, mRNA: g2692	g2692:c.1360A>C	g2692:p.Met454Leu
chr2	476378	SNV	1	A	C	6	20	30	0	36.1667	CDS: Cre02.g076650, Gene: Cre02.g076650, mRNA: Cre02.g076650	Cre02.g076650:c.262A>C	Cre02.g076650:p.Lys88Gln
chr2	476381	SNV	1	A	C	6	20	30	0	35.3333	CDS: Cre02.g076650, Gene: Cre02.g076650, mRNA: Cre02.g076650	Cre02.g076650:c.265A>C	Cre02.g076650:p.Lys89Gln
chr2	2605	SNV	1	A	G	39	130	30	0.487179	36.6026
chr2	2606	SNV	1	A	G	39	130	30	0.487179	36.6026
chr6	7985339	SNV	1	T	C	6	20	30	0.333333	34	Gene: Cre06.g303800, mRNA: Cre06.g303800	Cre06.g303800:c.901+81A>G
chr7	3550130	SNV	1	T	G	30	100	30	0.40625	34.4688
chr8	585599	SNV	1	A	G	6	20	30	0	34.5	Gene: Cre08.g359567, Gene: g8422, mRNA: Cre08.g359567, mRNA: g8422	g8422:c.[1978-332A>G]; Cre08.g359567:c.[1978-335A>G]
chr9	5860466	SNV	1	T	C	6	20	30	0.166667	36.5	Gene: g10015, mRNA: g10015	g10015:c.5710-195A>G
chr9	2358557	SNV	1	T	C	6	20	30	0.375	35.75	Gene: Cre09.g392000, Gene: g9452, mRNA: Cre09.g392000, mRNA: g9452	Cre09.g392000:c.[784-329T>C]; g9452:c.[784-329T>C]
chr9	327652	SNV	1	C	T	6	20	30	0.333333	36
scaffold_23	116107	SNV	1	G	A	9	30	30	0.4	35.8
scaffold_23	23159	SNV	1	A	T	14	47	29.7872	0	37.1429
chr10	5784759	SNV	1	A	C	22	74	29.7297	0.363636	34.2727	Gene: g11310, mRNA: g11310, Three_prime_utr: PAC:26904797.three_prime_UTR.1
chr12	654802	SNV	1	C	A	11	37	29.7297	0.25	35.25	Gene: g12111, mRNA: g12111	g12111:c.1211+266G>T
chr16	1059386	SNV	1	G	A	11	37	29.7297	0.428571	36.2857	Gene: g15715, mRNA: g15715	g15715:c.1615-1356C>T
chr16	6741154	Deletion	1	C	-	11	37	29.7297	0.181818	34.9091	CDS: g16707, Gene: g16707, mRNA: g16707	g16707:c.652delG	g16707:p.Gly218fs
chr17	5395171	SNV	1	G	C	11	37	29.7297	0.181818	36.8182	CDS: Cre17.g736650, Gene: Cre17.g736650, mRNA: Cre17.g736650	Cre17.g736650:c.918C>G
chr17	5395170	SNV	1	T	G	11	37	29.7297	0.181818	36.8182	CDS: Cre17.g736650, Gene: Cre17.g736650, mRNA: Cre17.g736650	Cre17.g736650:c.919A>C	Cre17.g736650:p.Ser307Arg
chr8	3068450	SNV	1	G	T	11	37	29.7297	0.230769	37.0769
chr9	7236793	SNV	1	T	C	11	37	29.7297	0.272727	34.7273
scaffold_21	53693	SNV	1	A	G	11	37	29.7297	0.0909091	34.7273
chr3	8270885	Deletion	1	C	-	19	64	29.6875	0.473684	30.8947
scaffold_22	123535	SNV	1	C	T	51	172	29.6512	0.352941	37.1373
scaffold_22	123536	SNV	1	T	G	51	172	29.6512	0.352941	37.1373
chr15	489249	SNV	1	T	G	8	27	29.6296	0.375	34.375	Gene: Cre15.g636650, mRNA: Cre15.g636650, Three_prime_utr: PAC:26898241.three_prime_UTR.1
chr16	670371	SNV	1	T	G	8	27	29.6296	0.333333	36.8889
chr16	5456386	SNV	1	A	G	8	27	29.6296	0.5	34.625
chr17	3136295	SNV	1	T	G	8	27	29.6296	0.125	37.375	Gene: Cre17.g721550, Gene: g17457, mRNA: Cre17.g721550, mRNA: g17457	Cre17.g721550:c.[118-83A>C]; g17457:c.[118-83A>C]
chr17	3136296	SNV	1	T	G	8	27	29.6296	0.125	37.375	Gene: Cre17.g721550, Gene: g17457, mRNA: Cre17.g721550, mRNA: g17457	Cre17.g721550:c.[118-84A>C]; g17457:c.[118-84A>C]
chr17	964857	SNV	1	C	A	8	27	29.6296	0.375	36.8125
chr17	964858	SNV	1	G	A	8	27	29.6296	0.375	36.8125
chr2	8196771	SNV	1	T	C	8	27	29.6296	0	37.75	Gene: g2692, mRNA: g2692, Three_prime_utr: PAC:26899558.three_prime_UTR.1
chr2	8197214	SNV	1	A	G	8	27	29.6296	0.222222	36.4444	Gene: g2692, mRNA: g2692, Three_prime_utr: PAC:26899558.three_prime_UTR.1
chr4	3831745	SNV	1	C	T	8	27	29.6296	0.25	37.4375
chr4	3831747	SNV	1	C	T	8	27	29.6296	0.25	37.4375
chr5	2076247	SNV	1	T	A	8	27	29.6296	0.25	36.5	Gene: Cre05.g234600, mRNA: Cre05.g234600	Cre05.g234600:c.3036+78A>T
chr7	2254400	SNV	1	T	C	8	27	29.6296	0.375	34.75	Gene: Cre07.g327500, mRNA: Cre07.g327500	Cre07.g327500:c.362+49A>G
scaffold_20	28623	SNV	1	G	A	8	27	29.6296	0.222222	37.4444	CDS: g18154, Gene: g18154, mRNA: g18154	g18154:c.949G>A	g18154:p.Ala317Thr
scaffold_22	122638	Insertion	1	-	C	24	81	29.6296	0.125	38.4583
chr14	522265	SNV	1	A	T	53	179	29.6089	0.433962	35.4717	Gene: Cre14.g611450, mRNA: Cre14.g611450, Three_prime_utr: PAC:26890822.three_prime_UTR.1
chr6	6862402	SNV	1	T	G	13	44	29.5455	0.307692	36.1538
chr9	635736	SNV	1	T	C	13	44	29.5455	0.307692	35.6154	Gene: Cre09.g403350, mRNA: Cre09.g403350, Three_prime_utr: PAC:26895964.three_prime_UTR.1
scaffold_21	77977	SNV	1	T	A	43	146	29.4521	0.363636	36.0227	Gene: g18174, mRNA: g18174, Three_prime_utr: PAC:26906212.three_prime_UTR.1
chr8	3171831	SNV	1	C	T	10	34	29.4118	0.416667	37.3333
chr9	94817	SNV	1	T	C	10	34	29.4118	0.5	37.1	CDS: g9105, Gene: g9105, mRNA: g9105	g9105:c.277T>C	g9105:p.Cys93Arg
chr14	522219	SNV	1	C	T	52	177	29.3785	0.442308	36.6154	Gene: Cre14.g611450, mRNA: Cre14.g611450, Three_prime_utr: PAC:26890822.three_prime_UTR.1
chr16	2872355	SNV	1	G	A	47	160	29.375	0.313725	37
chr8	400987	SNV	1	C	T	17	58	29.3103	0.352941	37.4706	Gene: g8390, mRNA: g8390
chr6	8745645	SNV	1	T	C	12	41	29.2683	0.5	36.2917	CDS: g7170, CDS: Cre06.g309850, Gene: Cre06.g309850, Gene: g7170, mRNA: Cre06.g309850, mRNA: g7170	Cre06.g309850:c.[32A>G]; g7170:c.[116A>G]	Cre06.g309850:p.[Gln11Gly]; g7170:p.[Gln39Gly]
chr6	8745646	SNV	1	G	C	12	41	29.2683	0.5	36.2917	CDS: g7170, CDS: Cre06.g309850, Gene: Cre06.g309850, Gene: g7170, mRNA: Cre06.g309850, mRNA: g7170	Cre06.g309850:c.[31C>G]; g7170:c.[115C>G]	Cre06.g309850:p.[Gln11Gly]; g7170:p.[Gln39Gly]
chr15	247262	Deletion	1	G	-	26	89	29.2135	0.230769	31.6154
chr11	8606	SNV	1	A	C	7	24	29.1667	0.142857	38	Gene: g11451, mRNA: g11451, Three_prime_utr: PAC:26890622.three_prime_UTR.1
chr2	8192703	SNV	1	A	G	7	24	29.1667	0.142857	35.3571
chr3	7122890	SNV	1	G	T	7	24	29.1667	0.285714	37.2143	Gene: g4137, Five_prime_utr: PAC:26902122.five_prime_UTR.1, mRNA: g4137
chr3	7122892	SNV	1	T	G	7	24	29.1667	0.285714	37.2143	Gene: g4137, Five_prime_utr: PAC:26902122.five_prime_UTR.1, mRNA: g4137
chr3	6951333	SNV	1	A	C	7	24	29.1667	0.25	36.625
chr3	7139719	SNV	1	G	T	7	24	29.1667	0.142857	38.2857
chr5	2356356	SNV	1	C	G	7	24	29.1667	0.142857	38.2143	Gene: g5400, Gene: g5401, mRNA: g5400, mRNA: g5401, Three_prime_utr: PAC:26898004.three_prime_UTR.1, Three_prime_utr: PAC:26897704.three_prime_UTR.1
chr6	3948753	SNV	1	G	A	7	24	29.1667	0.142857	33.2857	Gene: g6332, mRNA: g6332	g6332:c.658-154G>A
chr8	3004161	SNV	1	C	T	21	72	29.1667	0	38.4762	Gene: g8777, mRNA: g8777, Three_prime_utr: PAC:26888343.three_prime_UTR.1
chr11	2367473	SNV	1	T	C	48	165	29.0909	0.254902	36.9608
chr9	322241	SNV	1	T	C	16	55	29.0909	0.5	34.6667
chr10	4966092	SNV	1	C	T	9	31	29.0323	0.444444	34.6667	Gene: g11170, mRNA: g11170	g11170:c.239-37G>A
chr2	2999716	SNV	1	C	A	9	31	29.0323	0.111111	37.9444
chr2	5660566	SNV	1	A	T	9	31	29.0323	0.222222	36.8889
chr6	6862380	SNV	1	C	T	9	31	29.0323	0.444444	34.8889
chr7	5456193	SNV	1	A	G	9	31	29.0323	0.3	35.6	Gene: Cre07.g350600, mRNA: Cre07.g350600, Three_prime_utr: PAC:26888973.three_prime_UTR.1
chr9	318287	SNV	1	T	A	9	31	29.0323	0.111111	35.4444
scaffold_34	10041	SNV	1	C	T	9	31	29.0323	0.444444	35.6667
chr15	1467755	SNV	1	G	C	11	38	28.9474	0.454545	34.4545	Gene: g15492, mRNA: g15492	g15492:c.3838-396G>C
chr15	1419268	SNV	1	A	G	11	38	28.9474	0.454545	36.7273
chr3	7730662	Deletion	1	C	-	11	38	28.9474	0.0909091	28.6364
chr2	7868171	SNV	1	G	A	13	45	28.8889	0.230769	34.0769	Gene: Cre02.g141700, mRNA: Cre02.g141700	Cre02.g141700:c.1730+1952G>A
chr16	4037959	SNV	1	A	C	15	52	28.8462	0.4	37.6667	CDS: g16226, Gene: g16226, mRNA: g16226	g16226:c.2325A>C
chr10	4954448	Deletion	2	TG	-	17	59	28.8136	0.352941	34.1765
chr15	247230	Deletion	1	A	-	19	66	28.7879	0.315789	29.2632
chr17	660637	SNV	1	T	G	19	66	28.7879	0.368421	35.8421	Gene: Cre17.g700600, mRNA: Cre17.g700600
chr11	1441234	SNV	1	T	C	52	181	28.7293	0.446429	35.125	Gene: g11660, mRNA: g11660, mRNA: g11660	g11660:c.1408+58A>G
chr9	318585	SNV	1	A	C	27	94	28.7234	0.111111	35.8889
chr7	3550126	SNV	1	T	C	33	115	28.6957	0.4	35.2286
chr10	6573086	SNV	1	C	A	26	91	28.5714	0.230769	37.1154
chr11	448927	SNV	1	G	A	10	35	28.5714	0.272727	37.6364	CDS: g11519, Gene: g11519, mRNA: g11519	g11519:c.1902C>T
chr12	9189998	SNV	1	T	C	12	42	28.5714	0.166667	36.7917	CDS: g13733, CDS: Cre12.g541950, Gene: Cre12.g541950, Gene: g13733, mRNA: Cre12.g541950, mRNA: g13733	Cre12.g541950:c.[615A>G]; g13733:c.[615A>G]	Cre12.g541950:p.[Leu205Val]; g13733:p.[Leu205Val]
chr12	9190000	SNV	1	G	C	12	42	28.5714	0.166667	36.7917	CDS: g13733, CDS: Cre12.g541950, Gene: Cre12.g541950, Gene: g13733, mRNA: Cre12.g541950, mRNA: g13733	Cre12.g541950:c.[613C>G]; g13733:c.[613C>G]	Cre12.g541950:p.[Leu205Val]; g13733:p.[Leu205Val]
chr12	6732027	SNV	1	C	A	16	56	28.5714	0.470588	37.3529	CDS: g13277, Gene: g13277, mRNA: g13277	g13277:c.285G>T
chr12	902076	SNV	1	G	T	8	28	28.5714	0	36.125
chr13	3223357	SNV	1	A	C	6	21	28.5714	0.5	35.3333	Gene: g14375, mRNA: g14375	g14375:c.3018+302T>G
chr13	4353060	SNV	1	C	T	12	42	28.5714	0.416667	33.5
chr15	1404975	SNV	1	T	G	10	35	28.5714	0.3	35.9
chr15	1414574	SNV	1	C	T	16	56	28.5714	0.4375	37.8125
chr17	7088745	Insertion	1	-	C	14	49	28.5714	0.285714	34.1429
chr2	2177694	SNV	1	A	G	8	28	28.5714	0.25	36.375	Gene: Cre02.g089600, mRNA: Cre02.g089600	Cre02.g089600:c.662+57T>C
chr4	2331053	SNV	1	C	G	10	35	28.5714	0.5	35.4	Gene: Cre04.g220750, mRNA: Cre04.g220750, Three_prime_utr: PAC:26905548.three_prime_UTR.1
chr5	206267	SNV	1	A	T	6	21	28.5714	0.166667	33.6667	Gene: Cre05.g234100, mRNA: Cre05.g234100	Cre05.g234100:c.1195-66T>A
chr5	1273205	SNV	1	A	G	8	28	28.5714	0.111111	36.1111
chr6	3143074	Deletion	2	TG	-	6	21	28.5714	0	22.6667	Gene: Cre06.g275350, mRNA: Cre06.g275350	Cre06.g275350:c.1726+76_1726+77delTG
chr7	2576562	SNV	1	G	C	8	28	28.5714	0	35.25	CDS: Cre07.g329900, Gene: Cre07.g329900, mRNA: Cre07.g329900	Cre07.g329900:c.837G>C
chr8	2277291	SNV	1	T	C	8	28	28.5714	0.4	37.6
chr8	3775561	SNV	1	C	T	6	21	28.5714	0.333333	35.3333
chr9	881819	Insertion	2	-	AC	6	21	28.5714	0.333333	36.25	Gene: Cre09.g401450, mRNA: Cre09.g401450, Three_prime_utr: PAC:26894905.three_prime_UTR.1
chr9	2358879	Insertion	1	-	T	6	21	28.5714	0.333333	34.8333	Gene: Cre09.g392000, Gene: g9452, mRNA: Cre09.g392000, mRNA: g9452	Cre09.g392000:c.[784-8_784-7insT]; g9452:c.[784-8_784-7insT]
chr9	5405174	SNV	1	T	C	6	21	28.5714	0.166667	35.1667	CDS: g9946, Gene: g9946, mRNA: g9946	g9946:c.906T>C
chr9	7696058	SNV	1	T	C	6	21	28.5714	0.166667	34.8333
scaffold_22	11856	SNV	1	T	C	8	28	28.5714	0.5	35.125
scaffold_23	64222	SNV	1	C	A	10	35	28.5714	0.5	35.5	Gene: g18241, mRNA: g18241, Three_prime_utr: PAC:26888798.three_prime_UTR.1
chr2	9067171	SNV	1	G	A	25	88	28.4091	0.346154	35.5
chr14	4144096	SNV	1	C	A	23	81	28.3951	0.434783	37.0435
chr6	1677	SNV	1	T	G	36	127	28.3465	0.459459	34.8108
chr15	1430041	SNV	1	C	T	17	60	28.3333	0.294118	35.8627	CDS: g15490, Gene: g15490, mRNA: g15490	g15490:c.76C>T	g15490:p.Arg26*
chr15	1430043	SNV	1	G	A	17	60	28.3333	0.294118	35.8627	CDS: g15490, Gene: g15490, mRNA: g15490	g15490:c.78G>A	g15490:p.Arg26*
chr15	1463855	Deletion	4	GGAC	-	13	46	28.2609	0.0769231	33.1538	Gene: g15492, mRNA: g15492	g15492:c.3837+3643_3837+3646delGGAC
chr16	1803444	SNV	1	A	G	39	138	28.2609	0.25	35.15	Gene: g15841, mRNA: g15841, Three_prime_utr: PAC:26892244.three_prime_UTR.1
chr15	1485211	SNV	1	G	A	11	39	28.2051	0.0909091	35
chr17	3136334	SNV	1	C	G	11	39	28.2051	0.0909091	35.6364	Gene: Cre17.g721550, Gene: g17457, mRNA: Cre17.g721550, mRNA: g17457	Cre17.g721550:c.[118-122G>C]; g17457:c.[118-122G>C]
chr8	3066994	SNV	1	A	T	20	71	28.169	0.25	34.75
scaffold_22	5365	SNV	1	G	A	29	103	28.1553	0	36.1034	Gene: g18200, Five_prime_utr: PAC:26892872.five_prime_UTR.1, mRNA: g18200
chr12	1001791	SNV	1	C	G	9	32	28.125	0.5	34.9	CDS: g12153, Gene: g12153, mRNA: g12153	g12153:c.2709G>C
chr12	907694	SNV	1	T	C	27	96	28.125	0.275862	35.8966	CDS: g12149, Gene: g12149, mRNA: g12149	g12149:c.3713A>G	g12149:p.Glu1238Gly
chr12	3105380	SNV	1	G	T	9	32	28.125	0	38.2778
chr12	3105381	SNV	1	C	G	9	32	28.125	0	38.2778
chr12	9002055	Deletion	1	A	-	18	64	28.125	0.166667	30.1111
chr17	970094	SNV	1	G	A	9	32	28.125	0.444444	34.5556
chr17	2549235	SNV	1	A	C	9	32	28.125	0.222222	35.5556
chr3	6131465	SNV	1	G	A	9	32	28.125	0.333333	36
chr7	1910699	SNV	1	A	G	9	32	28.125	0.444444	36.6667	Gene: g7559, mRNA: g7559	g7559:c.320-522A>G
chr7	3871438	SNV	1	G	C	18	64	28.125	0.35	36.45	Gene: Cre07.g338900, mRNA: Cre07.g338900	Cre07.g338900:c.858+354C>G
chr9	318326	SNV	1	C	A	27	96	28.125	0.25	36.2143
scaffold_34	29481	SNV	1	G	T	9	32	28.125	0	38.1111
chr17	2929785	SNV	1	A	G	16	57	28.0702	0.368421	36.4211	Gene: g17423, mRNA: g17423	g17423:c.2888-33T>C
chr4	1075844	SNV	1	G	C	16	57	28.0702	0.4375	36	Gene: Cre04.g216300, mRNA: Cre04.g216300	Cre04.g216300:c.334+486G>C
chr4	807806	SNV	1	C	T	23	82	28.0488	0.347826	35.9565	CDS: g4605, CDS: g4605, Gene: g4605, mRNA: g4605, mRNA: g4605	g4605:c.[901G>A];[1204G>A]	g4605:p.[Val301Ile];[Val402Ile]
chr2	9005615	SNV	1	C	T	30	107	28.0374	0.3	36.8667
chr12	1006620	SNV	1	C	A	7	25	28	0.285714	37.5714	Gene: g12153, mRNA: g12153	g12153:c.187-147G>T
chr14	3540275	SNV	1	T	C	7	25	28	0	36.4286	Gene: g15203, mRNA: g15203, mRNA: g15203	g15203:c.[574-241A>G];[637-241A>G]
chr15	1421830	SNV	1	C	T	7	25	28	0	37.8571
chr16	6741020	SNV	1	G	A	7	25	28	0	36.2857	CDS: g16707, Gene: g16707, mRNA: g16707	g16707:c.786C>T	g16707:p.His262Arg
chr16	4037966	SNV	1	G	T	14	50	28	0.428571	37.1429	CDS: g16226, Gene: g16226, mRNA: g16226	g16226:c.2332G>T	g16226:p.Val778Phe
chr16	4037968	SNV	1	T	C	14	50	28	0.428571	37.1429	CDS: g16226, Gene: g16226, mRNA: g16226	g16226:c.2334T>C	g16226:p.Val778Phe
chr17	6062355	Deletion	1	G	-	7	25	28	0.285714	29.5714	Gene: g17926, mRNA: g17926, mRNA: g17926, Three_prime_utr: PAC:26896905.three_prime_UTR.1, Three_prime_utr: PAC:26896906.three_prime_UTR.1
chr17	6315172	SNV	1	C	G	7	25	28	0.285714	35.8571	CDS: g17964, Gene: g17964, mRNA: g17964	g17964:c.428G>C	g17964:p.Gly143Ala
chr2	2924550	SNV	1	G	T	7	25	28	0	35.8571
chr2	9067320	SNV	1	T	C	7	25	28	0.142857	38.2857
chr2	9067322	SNV	1	G	T	7	25	28	0.142857	38.2857
chr3	6951448	SNV	1	T	C	7	25	28	0.375	35.75
chr4	458831	SNV	1	A	G	14	50	28	0.357143	36.0714	Gene: g4556, mRNA: g4556	g4556:c.864+93A>G
chr4	936273	SNV	1	A	G	7	25	28	0.285714	35.1429
chr5	1273216	SNV	1	T	G	7	25	28	0.125	35
chr6	44677	SNV	1	G	A	7	25	28	0.142857	37
scaffold_22	11747	SNV	1	C	T	7	25	28	0.428571	35.8571
scaffold_22	122006	SNV	1	G	C	7	25	28	0.428571	34.8571
chr8	3070506	SNV	1	T	C	31	111	27.9279	0.354839	36.3548
chr2	8268716	Deletion	1	G	-	12	43	27.907	0.25	30.75	Gene: g2703, mRNA: g2703	g2703:c.85-95delG
chr2	8062504	SNV	1	C	A	12	43	27.907	0.0833333	36.4167	Gene: g2687, Gene: g2688, mRNA: g2687, mRNA: g2687, mRNA: g2687, mRNA: g2688, mRNA: g2688
scaffold_22	1767	Deletion	3	AAT	-	12	43	27.907	0.333333	31.1667	CDS: g18199, Gene: g18199, mRNA: g18199	g18199:c.76_78delATT	g18199:p.Ile26del
chr4	811905	SNV	1	C	T	22	79	27.8481	0.136364	34.9545	Gene: g4606, mRNA: g4606, Three_prime_utr: PAC:26906172.three_prime_UTR.1
chr4	811906	SNV	1	C	T	22	79	27.8481	0.136364	34.9545	Gene: g4606, mRNA: g4606, Three_prime_utr: PAC:26906172.three_prime_UTR.1
scaffold_22	123517	SNV	1	T	C	52	187	27.8075	0.153846	37.5962
chr17	981227	SNV	1	G	A	15	54	27.7778	0.266667	34.4667
chr8	3258079	SNV	1	G	C	10	36	27.7778	0.1	37.1	Gene: g8806, mRNA: g8806, mRNA: g8806	g8806:c.[8924-1202G>C];[8924-1202G>C]
scaffold_39	7925	SNV	1	G	A	10	36	27.7778	0.272727	37.0909
chr9	2355910	SNV	1	A	C	74	267	27.7154	0.428571	36.1818
chr1	1332753	SNV	1	C	G	23	83	27.7108	0.347826	36.3043	CDS: Cre01.g006700, Gene: Cre01.g006700, mRNA: Cre01.g006700	Cre01.g006700:c.311C>G	Cre01.g006700:p.Ala104Gly
chr11	2378951	SNV	1	A	C	23	83	27.7108	0.125	37.4583
chr3	8352142	SNV	1	A	C	13	47	27.6596	0.307692	36.6154	Gene: Cre03.g198800, Five_prime_utr: PAC:26902141.five_prime_UTR.2, mRNA: Cre03.g198800
chr12	889041	SNV	1	G	C	29	105	27.619	0.137931	36.5862
chr12	889042	SNV	1	G	A	29	105	27.619	0.137931	36.5862
chr11	2378059	SNV	1	T	G	119	431	27.6102	0.412698	35.4365
chr11	10914	SNV	1	C	T	8	29	27.5862	0	37.125	CDS: g11451, Gene: g11451, mRNA: g11451	g11451:c.2128G>A	g11451:p.Ala710Thr
chr12	872241	SNV	1	G	A	8	29	27.5862	0.375	34.875	Gene: g12146, mRNA: g12146	g12146:c.870-566C>T
chr12	902069	SNV	1	T	C	8	29	27.5862	0	36.75
chr13	1432467	SNV	1	T	C	8	29	27.5862	0.5	35.125	Gene: Cre13.g572100, mRNA: Cre13.g572100, Three_prime_utr: PAC:26898782.three_prime_UTR.1
chr14	201418	SNV	1	C	T	8	29	27.5862	0.375	35.125	Gene: g14683, mRNA: g14683	g14683:c.445-120G>A
chr16	5716277	SNV	1	C	T	8	29	27.5862	0.125	32.75
chr3	6951325	SNV	1	T	C	8	29	27.5862	0.222222	37.1111
chr4	927105	SNV	1	G	A	8	29	27.5862	0	37.75
chr7	1705453	Insertion	1	-	T	8	29	27.5862	0.25	38.125
chr7	3550109	SNV	1	C	T	27	98	27.551	0.357143	36.25
chr16	2874341	SNV	1	G	A	19	69	27.5362	0.157895	36.2105
chr4	741757	SNV	1	G	C	11	40	27.5	0.0909091	36.0909	CDS: g4593, Gene: g4593, mRNA: g4593	g4593:c.33G>C
chr6	6862235	SNV	1	G	C	14	51	27.451	0.285714	34.3571
chr11	422699	SNV	1	T	C	6	22	27.2727	0.25	37.375	CDS: g11514, Gene: g11514, mRNA: g11514	g11514:c.2019T>C
chr12	686442	SNV	1	G	A	6	22	27.2727	0.5	34.5833	Gene: g12114, mRNA: g12114	g12114:c.19-12C>T
chr12	686443	SNV	1	A	G	6	22	27.2727	0.5	34.5833	Gene: g12114, mRNA: g12114	g12114:c.19-13T>C
chr12	5808221	SNV	1	T	C	6	22	27.2727	0	39.6667	Gene: Cre12.g533500, mRNA: Cre12.g533500, Three_prime_utr: PAC:26906359.three_prime_UTR.1
chr12	6759147	SNV	1	A	G	6	22	27.2727	0.333333	34	CDS: Cre12.g561750, Gene: Cre12.g561750, mRNA: Cre12.g561750	Cre12.g561750:c.753A>G
chr13	205746	SNV	1	A	G	6	22	27.2727	0.333333	38	Gene: Cre13.g563500, mRNA: Cre13.g563500	Cre13.g563500:c.1108-25T>C
chr2	9074428	SNV	1	G	T	9	33	27.2727	0	37.7778	Gene: g2824, mRNA: g2824, Three_prime_utr: PAC:26900537.three_prime_UTR.1
chr3	2204597	SNV	1	G	A	6	22	27.2727	0	37.5
chr4	33936	SNV	1	C	A	6	22	27.2727	0	39.8333	Gene: g4495, mRNA: g4495	g4495:c.1843+380G>T
chr5	2942968	Deletion	1	G	-	9	33	27.2727	0.333333	37.4444	Gene: g5485, mRNA: g5485	g5485:c.1566+181delC
chr6	5513147	Deletion	1	C	-	6	22	27.2727	0.333333	32	Gene: Cre06.g284850, Gene: g6623, mRNA: Cre06.g284850, mRNA: g6623	Cre06.g284850:c.[1335+60delG]; g6623:c.[1335+60delG]
chr6	6862044	SNV	1	T	A	6	22	27.2727	0.166667	36
chr6	8842931	SNV	1	T	C	6	22	27.2727	0.5	35.6667
chr7	4631686	SNV	1	C	T	12	44	27.2727	0.25	34.8333	Gene: g8011, mRNA: g8011, Three_prime_utr: PAC:26889070.three_prime_UTR.1
chr7	4631688	SNV	1	A	G	12	44	27.2727	0.25	34.8333	Gene: g8011, mRNA: g8011, Three_prime_utr: PAC:26889070.three_prime_UTR.1
chr7	1910494	SNV	1	T	C	6	22	27.2727	0.333333	37.3333	Gene: g7559, mRNA: g7559	g7559:c.319+508T>C
chr7	4448537	Insertion	2	-	CA	6	22	27.2727	0.166667	37.8333	Gene: Cre07.g343200, mRNA: Cre07.g343200	Cre07.g343200:c.4116-33_4116-32insCA
chr7	2254395	SNV	1	C	A	6	22	27.2727	0.333333	35	Gene: Cre07.g327500, mRNA: Cre07.g327500	Cre07.g327500:c.362+54G>T
chr8	1381687	SNV	1	T	G	6	22	27.2727	0.166667	33.5	Gene: Cre08.g364050, mRNA: Cre08.g364050	Cre08.g364050:c.605+100A>C
chr8	2233292	SNV	1	C	A	6	22	27.2727	0.166667	33.1667	CDS: Cre08.g369900, Gene: Cre08.g369900, mRNA: Cre08.g369900	Cre08.g369900:c.691C>A	Cre08.g369900:p.Leu231Ile
chr8	42393	SNV	1	A	G	30	110	27.2727	0.451613	34.8387
chr9	2358549	SNV	1	A	T	6	22	27.2727	0.444444	36.2222	Gene: Cre09.g392000, Gene: g9452, mRNA: Cre09.g392000, mRNA: g9452	Cre09.g392000:c.[783+322A>T]; g9452:c.[783+322A>T]
chr9	317685	SNV	1	G	A	12	44	27.2727	0	37.25
chr9	413939	SNV	1	G	A	12	44	27.2727	0.230769	33.6154
chr9	5295568	SNV	1	A	G	6	22	27.2727	0.166667	38.4167
chr9	5295569	SNV	1	T	G	6	22	27.2727	0.166667	38.4167
chr9	7782920	SNV	1	T	C	6	22	27.2727	0	37.6667
scaffold_22	99629	Deletion	1	C	-	9	33	27.2727	0.111111	34.7778
scaffold_22	99631	Deletion	1	C	-	9	33	27.2727	0.111111	35.7778
scaffold_22	123831	SNV	1	A	C	9	33	27.2727	0.363636	36.1818
chr14	2692482	SNV	1	G	C	52	191	27.2251	0.211538	35.875	Gene: g15090, mRNA: g15090	g15090:c.136+116C>G
chr17	4008824	Insertion	1	-	A	10	37	27.027	0.1	36.7	Gene: Cre17.g728950, mRNA: Cre17.g728950	Cre17.g728950:c.698+108_698+109insT
chr6	6862191	SNV	1	T	C	10	37	27.027	0.3	35.45
chr6	6862193	SNV	1	C	T	10	37	27.027	0.3	35.45
chr6	6373989	SNV	1	G	A	17	63	26.9841	0.176471	34.2941	Gene: g6770, mRNA: g6770, Three_prime_utr: PAC:26894131.three_prime_UTR.1
chr2	7867531	SNV	1	G	A	41	152	26.9737	0.404762	35.9286	Gene: Cre02.g141700, mRNA: Cre02.g141700	Cre02.g141700:c.1730+1312G>A
chr9	2355917	SNV	1	A	T	72	267	26.9663	0.388889	37.25
chr9	2355919	SNV	1	A	C	72	267	26.9663	0.388889	37.25
chr1	844484	SNV	1	C	T	7	26	26.9231	0.222222	34.3333	Gene: Cre01.g004350, mRNA: Cre01.g004350	Cre01.g004350:c.859-263C>T
chr10	5869809	SNV	1	G	A	14	52	26.9231	0.214286	35.7143	Gene: Cre10.g461850, mRNA: Cre10.g461850	Cre10.g461850:c.1487+888G>A
chr10	1713401	SNV	1	C	T	14	52	26.9231	0.0714286	37.0714	Gene: Cre10.g430450, mRNA: Cre10.g430450	Cre10.g430450:c.993-220G>A
chr13	3040955	SNV	1	C	T	7	26	26.9231	0.444444	35.6667	CDS: g14346, CDS: g14346, Gene: g14346, mRNA: g14346, mRNA: g14346	g14346:c.[13071G>A];[13983G>A]
chr14	2114765	SNV	1	T	A	7	26	26.9231	0	34.5714
chr15	1467690	SNV	1	G	C	7	26	26.9231	0.142857	37.1429	Gene: g15492, mRNA: g15492	g15492:c.3838-461G>C
chr16	631988	SNV	1	G	T	7	26	26.9231	0	33.1429	Gene: Cre16.g692000, mRNA: Cre16.g692000, Three_prime_utr: PAC:26891652.three_prime_UTR.1
chr2	5660005	SNV	1	T	G	7	26	26.9231	0.428571	35.2857	Gene: Cre02.g109650, mRNA: Cre02.g109650, Three_prime_utr: PAC:26901052.three_prime_UTR.1
chr4	239288	Insertion	2	-	TG	7	26	26.9231	0.285714	36.5714	Gene: Cre04.g217450, mRNA: Cre04.g217450	Cre04.g217450:c.768+111_768+112insTG
chr9	4676989	SNV	1	C	A	21	78	26.9231	0	37.0952
scaffold_21	86181	Insertion	1	-	G	7	26	26.9231	0.142857	35.4286	Gene: g18177, mRNA: g18177, Three_prime_utr: PAC:26906232.three_prime_UTR.1
scaffold_23	23146	SNV	1	T	C	14	52	26.9231	0	37
scaffold_23	83468	SNV	1	G	C	7	26	26.9231	0.25	36.75
chr10	1713388	Deletion	1	C	-	11	41	26.8293	0.454545	29.6364	Gene: Cre10.g430450, mRNA: Cre10.g430450	Cre10.g430450:c.993-207delG
chr15	1466301	SNV	1	G	A	11	41	26.8293	0.454545	36.8182	Gene: g15492, mRNA: g15492	g15492:c.3838-1850G>A
chr17	965099	SNV	1	C	A	11	41	26.8293	0.363636	37.2273
chr17	965101	SNV	1	G	T	11	41	26.8293	0.363636	37.2273
chr7	4494482	SNV	1	C	T	11	41	26.8293	0.416667	36.25	Gene: g7988, mRNA: g7988	g7988:c.237+372C>T
scaffold_18	24329	SNV	1	C	T	22	82	26.8293	0.272727	35.6818	Gene: g18081, mRNA: g18081, Three_prime_utr: PAC:26898419.three_prime_UTR.1
scaffold_18	24330	SNV	1	C	T	22	82	26.8293	0.272727	35.6818	Gene: g18081, mRNA: g18081, Three_prime_utr: PAC:26898419.three_prime_UTR.1
chr4	821645	SNV	1	T	C	15	56	26.7857	0.333333	37.0667
scaffold_22	123545	SNV	1	C	T	34	127	26.7717	0.411765	37.0441
chr9	325510	SNV	1	A	G	27	101	26.7327	0.482759	35.2759
chr15	1419271	SNV	1	G	A	12	45	26.6667	0.416667	37.3333
chr16	3943424	SNV	1	T	C	8	30	26.6667	0.25	36	CDS: g16214, Gene: g16214, mRNA: g16214	g16214:c.149T>C	g16214:p.Val50Ala
chr17	2929774	Deletion	1	C	-	16	60	26.6667	0.375	34.5	Gene: g17423, mRNA: g17423	g17423:c.2888-22delG
chr2	8199350	SNV	1	T	G	16	60	26.6667	0.1875	37.0833	Gene: g2692, mRNA: g2692	g2692:c.487+56A>C
chr2	8199352	SNV	1	C	A	16	60	26.6667	0.1875	37.0833	Gene: g2692, mRNA: g2692	g2692:c.487+54G>T
chr2	6618268	SNV	1	A	C	16	60	26.6667	0.294118	37.4706	Gene: g2431, mRNA: g2431, Three_prime_utr: PAC:26900855.three_prime_UTR.2
chr3	8352704	SNV	1	C	G	16	60	26.6667	0.411765	36.1765	Gene: Cre03.g198800, Five_prime_utr: PAC:26902141.five_prime_UTR.1, mRNA: Cre03.g198800
chr3	6950271	SNV	1	T	C	8	30	26.6667	0.333333	34.5556
chr6	7532838	Insertion	9	-	CCGTTGCAG	8	30	26.6667	0	37.9444	CDS: Cre06.g300650, Gene: Cre06.g300650, mRNA: Cre06.g300650	Cre06.g300650:c.36_37insCCGTTGCAG	Cre06.g300650:p.Gln12_Ala13insProLeuGln
chr8	2277300	SNV	1	A	C	8	30	26.6667	0.444444	37.3333
chr3	6950671	SNV	1	C	T	66	248	26.6129	0.439394	35.053
chr4	901669	SNV	1	C	A	25	94	26.5957	0.36	36.28
chr8	3781717	SNV	1	A	G	21	79	26.5823	0.333333	37.4762
chr12	151115	SNV	1	G	T	47	177	26.5537	0.137255	36.098	Gene: Cre12.g484450, Five_prime_utr: PAC:26906549.five_prime_UTR.1, mRNA: Cre12.g484450
chr4	739612	SNV	1	A	T	43	162	26.5432	0.304348	36.1522
chr1	7439898	SNV	1	A	G	13	49	26.5306	0	36.0769
chr9	413953	SNV	1	C	T	13	49	26.5306	0.5	33.9286
chr2	126540	SNV	1	G	C	22	83	26.506	0.363636	36.2727	Gene: Cre02.g074150, Gene: g1315, mRNA: Cre02.g074150, mRNA: g1315, Three_prime_utr: PAC:26900069.three_prime_UTR.1, Three_prime_utr: PAC:26900068.three_prime_UTR.1
chr12	1001816	SNV	1	A	T	9	34	26.4706	0.5	36	CDS: g12153, Gene: g12153, mRNA: g12153	g12153:c.2684T>A	g12153:p.Leu895Gln
chr15	1421855	SNV	1	G	C	9	34	26.4706	0	38.4444
chr4	741765	SNV	1	A	T	9	34	26.4706	0.222222	34.6667	CDS: g4593, Gene: g4593, mRNA: g4593	g4593:c.41A>T	g4593:p.Tyr14Phe
chr4	736117	SNV	1	G	T	9	34	26.4706	0	33.6667
chr1	777976	Deletion	2	CG	-	14	53	26.4151	0.357143	32.3571
chr2	8642424	SNV	1	A	G	14	53	26.4151	0.357143	35.5
chr15	491073	SNV	1	T	C	10	38	26.3158	0.5	36.7	Gene: g15357, mRNA: g15357	g15357:c.1615-255A>G
chr15	105901	SNV	1	A	C	5	19	26.3158	0	36.6
chr15	105902	SNV	1	T	C	5	19	26.3158	0	36.6
chr2	8065977	SNV	1	G	A	20	76	26.3158	0.190476	35.0476	Gene: g2687, Gene: g2688, mRNA: g2687, mRNA: g2687, mRNA: g2687, mRNA: g2688, mRNA: g2688, Three_prime_utr: PAC:26899741.three_prime_UTR.5, Three_prime_utr: PAC:26899742.three_prime_UTR.5
scaffold_22	26089	SNV	1	A	G	10	38	26.3158	0.3	35.8
chr8	2280552	SNV	1	C	T	16	61	26.2295	0.125	36.625
chr16	3944234	SNV	1	A	C	11	42	26.1905	0.363636	37.1818	Gene: g16214, mRNA: g16214	g16214:c.416+543A>C
chr2	8979535	SNV	1	G	T	11	42	26.1905	0.272727	35.6364	CDS: g2806, Gene: g2806, mRNA: g2806	g2806:c.1495C>A	g2806:p.Pro499Thr
chr4	821959	SNV	1	C	T	11	42	26.1905	0.454545	33.3636
chr6	6862399	SNV	1	T	C	11	42	26.1905	0.272727	37.7273
chr8	585060	SNV	1	G	T	11	42	26.1905	0	39	Gene: Cre08.g359567, Gene: g8422, mRNA: Cre08.g359567, mRNA: g8422	g8422:c.[1977+344G>T]; Cre08.g359567:c.[1977+344G>T]
chr9	322357	SNV	1	G	T	11	42	26.1905	0.272727	33.7273
scaffold_34	14550	Deletion	1	C	-	28	107	26.1682	0.142857	35.0714
chr4	795492	SNV	1	T	C	17	65	26.1538	0.235294	35.4706
chr6	3510579	SNV	1	C	G	17	65	26.1538	0.368421	37.1053
scaffold_22	123492	SNV	1	C	T	57	218	26.1468	0.12069	35.069
chr1	6130042	Insertion	2	-	CA	30	115	26.087	0.5	33.7333
chr10	195	Deletion	1	C	-	6	23	26.087	0.333333	19.8333
chr12	1003306	SNV	1	G	C	6	23	26.087	0	37.1667	CDS: g12153, Gene: g12153, mRNA: g12153	g12153:c.1362C>G
chr13	4459350	SNV	1	C	T	6	23	26.087	0.5	34.5833	Gene: Cre13.g603450, mRNA: Cre13.g603450	Cre13.g603450:c.72+137C>T
chr13	4459352	SNV	1	C	G	6	23	26.087	0.5	34.5833	Gene: Cre13.g603450, mRNA: Cre13.g603450	Cre13.g603450:c.72+139C>G
chr14	3862172	Deletion	2	CA	-	6	23	26.087	0.5	27.6667	Gene: g15250, mRNA: g15250	g15250:c.558+122_558+123delCA
chr15	105840	SNV	1	G	A	6	23	26.087	0.5	35.25
chr15	1424884	SNV	1	T	G	12	46	26.087	0.416667	34.5833
chr15	1483856	SNV	1	G	A	6	23	26.087	0.5	36.0833
chr15	1483858	SNV	1	G	A	6	23	26.087	0.5	36.0833
chr17	6693226	Deletion	1	G	-	6	23	26.087	0.333333	27.8333	Gene: g17999, mRNA: g17999	g17999:c.4188-20delC
chr17	980659	SNV	1	G	A	6	23	26.087	0.5	36
chr2	8465092	SNV	1	C	T	6	23	26.087	0.5	37.3333
chr2	9070204	SNV	1	T	A	6	23	26.087	0	38.3333
chr3	6950162	SNV	1	A	T	48	184	26.087	0.0208333	35.25
chr6	4606149	SNV	1	C	A	6	23	26.087	0.166667	38.8333	CDS: g6443, Gene: g6443, mRNA: g6443	g6443:c.3028C>A
chr6	3510575	SNV	1	G	A	18	69	26.087	0.421053	36.8421
chr7	3870966	SNV	1	A	G	6	23	26.087	0.333333	35.3333	Gene: Cre07.g338900, mRNA: Cre07.g338900	Cre07.g338900:c.859-260T>C
chr8	564462	SNV	1	A	G	6	23	26.087	0.333333	36.3333	Gene: Cre08.g359450, mRNA: Cre08.g359450	Cre08.g359450:c.994-447T>C
chr8	3782217	SNV	1	A	C	12	46	26.087	0.461538	37.3846
chr9	6941675	SNV	1	T	A	24	92	26.087	0.0416667	33.7917	Gene: g10169, mRNA: g10169, Three_prime_utr: PAC:26895066.three_prime_UTR.1
chr9	2358553	SNV	1	G	A	6	23	26.087	0.375	35.125	Gene: Cre09.g392000, Gene: g9452, mRNA: Cre09.g392000, mRNA: g9452	Cre09.g392000:c.[783+326G>A]; g9452:c.[783+326G>A]
chr9	5307390	SNV	1	G	A	6	23	26.087	0	36.6667
chr9	7696084	Deletion	1	C	-	6	23	26.087	0.333333	28.1667
chr9	322231	SNV	1	C	A	19	73	26.0274	0.4	36.55
chr17	984939	SNV	1	T	A	13	50	26	0.461538	37.4615
chr2	2595604	SNV	1	G	A	13	50	26	0.5	34.6429
chr3	6949966	SNV	1	C	A	33	127	25.9843	0.0882353	37.3235
chr1	6130036	SNV	1	C	T	20	77	25.974	0.3	32.85
chr12	6579433	SNV	1	C	T	7	27	25.9259	0.285714	34.7143
chr15	490593	SNV	1	C	G	7	27	25.9259	0	36	Gene: g15357, mRNA: g15357, Three_prime_utr: PAC:26898114.three_prime_UTR.1
chr15	1486712	SNV	1	G	A	7	27	25.9259	0.142857	35
chr17	3575934	SNV	1	A	T	7	27	25.9259	0.142857	37.7143	Gene: Cre17.g725600, mRNA: Cre17.g725600	Cre17.g725600:c.966+39T>A
chr6	7030295	Deletion	1	A	-	7	27	25.9259	0.142857	27.5714	Gene: Cre06.g296900, Five_prime_utr: PAC:26894171.five_prime_UTR.1, mRNA: Cre06.g296900
chr7	3550105	SNV	1	T	A	21	81	25.9259	0.238095	34.7619
chr9	2365549	SNV	1	G	T	14	54	25.9259	0.466667	35.7333	Gene: Cre09.g392000, Gene: g9452, mRNA: Cre09.g392000, mRNA: g9452	Cre09.g392000:c.[2421+12G>T]; g9452:c.[2421+12G>T]
chr9	325005	SNV	1	A	C	7	27	25.9259	0.428571	36.2143
chr9	325007	SNV	1	C	T	7	27	25.9259	0.428571	36.2143
chr12	9002057	SNV	1	A	G	15	58	25.8621	0.25	34.125
chr9	7849713	Deletion	1	C	-	15	58	25.8621	0.4	28.5333	Gene: Cre09.g416750, mRNA: Cre09.g416750, Three_prime_utr: PAC:26895920.three_prime_UTR.1
chr11	68310	Insertion	2	-	TG	8	31	25.8065	0.375	36.8125	Gene: g11459, mRNA: g11459	g11459:c.857-156_857-155insTG
chr16	5594806	SNV	1	G	A	8	31	25.8065	0.375	36.375	Gene: Cre16.g679900, mRNA: Cre16.g679900	Cre16.g679900:c.2191-353G>A
chr2	8205491	SNV	1	C	T	8	31	25.8065	0.222222	36.8889	Gene: g2693, mRNA: g2693	g2693:c.735+304G>A
chr2	8064028	SNV	1	A	T	16	62	25.8065	0.1875	35.125	Gene: g2687, Gene: g2688, mRNA: g2687, mRNA: g2687, mRNA: g2687, mRNA: g2688, mRNA: g2688, Three_prime_utr: PAC:26899741.three_prime_UTR.6, Three_prime_utr: PAC:26899742.three_prime_UTR.6
chr3	2365409	SNV	1	G	T	8	31	25.8065	0	36.75	Gene: Cre03.g158550, mRNA: Cre03.g158550, Three_prime_utr: PAC:26901740.three_prime_UTR.1
chr3	6839186	SNV	1	A	C	8	31	25.8065	0.375	36.875	CDS: Cre03.g198250, Gene: Cre03.g198250, mRNA: Cre03.g198250	Cre03.g198250:c.207T>G	Cre03.g198250:p.His69Lys
chr3	6839188	SNV	1	G	T	8	31	25.8065	0.375	36.875	CDS: Cre03.g198250, Gene: Cre03.g198250, mRNA: Cre03.g198250	Cre03.g198250:c.205C>A	Cre03.g198250:p.His69Lys
chr9	321698	SNV	1	T	C	16	62	25.8065	0.470588	35.7059
scaffold_22	1793	SNV	1	A	G	8	31	25.8065	0.375	36.125	CDS: g18199, Gene: g18199, mRNA: g18199	g18199:c.52T>C	g18199:p.Tyr18His
chr10	5784770	SNV	1	G	A	17	66	25.7576	0.294118	35.7647	Gene: g11310, mRNA: g11310, Three_prime_utr: PAC:26904797.three_prime_UTR.1
scaffold_38	22292	SNV	1	T	C	17	66	25.7576	0.352941	36.4706
chr13	4016412	SNV	1	C	A	9	35	25.7143	0	36.2222	Gene: g14495, mRNA: g14495	g14495:c.6398+102G>T
chr14	202311	SNV	1	T	G	9	35	25.7143	0.3	34	Gene: g14683, mRNA: g14683	g14683:c.387-102A>C
chr3	6839183	SNV	1	G	A	9	35	25.7143	0.444444	35.7778	CDS: Cre03.g198250, Gene: Cre03.g198250, mRNA: Cre03.g198250	Cre03.g198250:c.210C>T
chr9	5082953	SNV	1	T	G	9	35	25.7143	0	37.7778	CDS: g9894, CDS: g9894, Gene: g9894, mRNA: g9894, mRNA: g9894	g9894:c.[297A>C];[297A>C]	g9894:p.[Lys99Asn];[Lys99Asn]
chr4	738313	SNV	1	C	T	83	323	25.6966	0.325301	36.8012
chr4	738314	SNV	1	C	T	83	323	25.6966	0.325301	36.8012
chr10	5784729	SNV	1	C	A	28	109	25.6881	0.464286	33.8214	Gene: g11310, mRNA: g11310, Three_prime_utr: PAC:26904797.three_prime_UTR.1
chr11	448930	SNV	1	C	T	10	39	25.641	0.272727	37.0909	CDS: g11519, Gene: g11519, mRNA: g11519	g11519:c.1899G>A
chr15	1751319	SNV	1	G	T	10	39	25.641	0.3	36.9
chr16	724293	Deletion	1	G	-	20	78	25.641	0.4	33.15	Gene: Cre16.g691177, Gene: g15661, mRNA: Cre16.g691177, mRNA: g15661, Three_prime_utr: PAC:26891746.three_prime_UTR.1, Three_prime_utr: PAC:26891745.three_prime_UTR.1
chr17	970105	Deletion	1	G	-	10	39	25.641	0.4	33
chr3	6934567	SNV	1	A	G	10	39	25.641	0.3	35.3
chr3	7730666	SNV	1	G	A	10	39	25.641	0.2	33.4
chr13	2939421	Deletion	1	G	-	11	43	25.5814	0.272727	34.7273	CDS: g14332, Gene: g14332, mRNA: g14332	g14332:c.165delG	g14332:p.Pro55fs
chr13	4353067	Deletion	1	A	-	11	43	25.5814	0.272727	27.4545
chr16	4037944	SNV	1	T	G	11	43	25.5814	0.363636	38.3636	CDS: g16226, Gene: g16226, mRNA: g16226	g16226:c.2310T>G
chr8	2280241	SNV	1	T	A	11	43	25.5814	0.5	38.0833
chr9	5078665	SNV	1	A	C	11	43	25.5814	0	35.1818	Gene: g9894, mRNA: g9894, mRNA: g9894, Three_prime_utr: PAC:26895991.three_prime_UTR.3, Three_prime_utr: PAC:26895990.three_prime_UTR.3
chr9	2355725	SNV	1	A	T	55	215	25.5814	0.392857	35.75	Gene: Cre09.g392050, Gene: g9451, Five_prime_utr: PAC:26894993.five_prime_UTR.1, Five_prime_utr: PAC:26894994.five_prime_UTR.1, mRNA: Cre09.g392050, mRNA: g9451
scaffold_22	99853	SNV	1	C	A	11	43	25.5814	0.363636	33.4545
chr12	903942	SNV	1	C	T	12	47	25.5319	0.166667	35.5833
chr15	1753079	SNV	1	A	T	24	94	25.5319	0.4	36.52
chr16	3944239	Insertion	3	-	CAA	12	47	25.5319	0.333333	36.25	Gene: g16214, mRNA: g16214	g16214:c.416+547_416+548insCAA
chr2	8192869	SNV	1	C	T	12	47	25.5319	0.25	37.0833
chr3	6951506	SNV	1	C	T	12	47	25.5319	0.466667	35.7333
chr5	2917148	SNV	1	A	T	12	47	25.5319	0.416667	37.4167	Gene: Cre05.g238140, mRNA: Cre05.g238140, Three_prime_utr: PAC:26897690.three_prime_UTR.1
scaffold_23	51977	SNV	1	A	T	38	149	25.5034	0.131579	36.7632
chr11	3752020	SNV	1	C	G	13	51	25.4902	0.384615	35.1538
chr6	6852801	SNV	1	A	T	13	51	25.4902	0.5	35.3571
chr11	2366185	SNV	1	A	T	30	118	25.4237	0.1	36.0333
chr16	4039432	SNV	1	T	C	15	59	25.4237	0.470588	35.3529
chr7	2576637	SNV	1	A	C	15	59	25.4237	0.2	35	CDS: Cre07.g329900, Gene: Cre07.g329900, mRNA: Cre07.g329900	Cre07.g329900:c.912A>C
scaffold_23	52390	SNV	1	T	G	15	59	25.4237	0.333333	36.8667
chr9	328715	SNV	1	T	G	16	63	25.3968	0.25	34.8438
chr4	738669	SNV	1	G	A	17	67	25.3731	0.235294	34.1765
chr8	4791852	SNV	1	G	A	17	67	25.3731	0.176471	36.9412	Gene: g9045, mRNA: g9045, mRNA: g9045	g9045:c.[872+620G>A];[872+620G>A]
scaffold_44	4666	SNV	1	G	A	19	75	25.3333	0.47619	36.2857
chr15	314144	Deletion	1	G	-	23	91	25.2747	0.347826	28.1739	Gene: Cre15.g635700, mRNA: Cre15.g635700, Three_prime_utr: PAC:26898163.three_prime_UTR.1
chr2	8063752	SNV	1	C	A	23	91	25.2747	0.208333	35.2083	Gene: g2687, Gene: g2688, mRNA: g2687, mRNA: g2687, mRNA: g2687, mRNA: g2688, mRNA: g2688, Three_prime_utr: PAC:26899741.three_prime_UTR.6, Three_prime_utr: PAC:26899742.three_prime_UTR.6
chr4	739656	SNV	1	G	A	23	91	25.2747	0.304348	35.7391
chr9	302488	SNV	1	G	A	26	103	25.2427	0.192308	33.6923	Gene: g9146, mRNA: g9146, Three_prime_utr: PAC:26895993.three_prime_UTR.1
chr2	8198217	SNV	1	C	A	33	131	25.1908	0.30303	35.2576	CDS: g2692, Gene: g2692, mRNA: g2692	g2692:c.869G>T	g2692:p.Gly290Ile
chr10	731568	SNV	1	T	G	7	28	25	0.444444	36.8889	Gene: Cre10.g422718, mRNA: Cre10.g422718, Three_prime_utr: PAC:26905019.three_prime_UTR.1
chr11	2367194	SNV	1	A	C	5	20	25	0	36
chr11	2367195	SNV	1	C	T	5	20	25	0	36
chr11	2367196	SNV	1	A	G	5	20	25	0	36
chr12	1007210	SNV	1	A	C	17	68	25	0.352941	36.4706	Gene: g12153, mRNA: g12153	g12153:c.60+45T>G
chr12	1007212	SNV	1	C	G	17	68	25	0.352941	36.4706	Gene: g12153, mRNA: g12153	g12153:c.60+43G>C
chr12	977445	SNV	1	T	G	5	20	25	0	32	Gene: g12152, mRNA: g12152, mRNA: g12152	g12152:c.[5118-553A>C];[7578-553A>C]
chr12	9444301	Deletion	1	C	-	5	20	25	0.4	32.6	Gene: Cre12.g539650, mRNA: Cre12.g539650, Three_prime_utr: PAC:26907171.three_prime_UTR.1
chr12	1686004	SNV	1	A	G	19	76	25	0.5	35.45	Gene: Cre12.g485800, mRNA: Cre12.g485800	Cre12.g485800:c.1397-150T>C
chr12	907372	SNV	1	A	G	5	20	25	0.2	37	CDS: g12149, Gene: g12149, mRNA: g12149	g12149:c.4035T>C
chr12	903716	SNV	1	C	T	8	32	25	0.125	35.5
chr12	6647252	SNV	1	C	T	37	148	25	0.333333	36.2051
chr15	1867998	SNV	1	T	A	5	20	25	0.2	36.8	Gene: g15531, Gene: g15532, mRNA: g15531, mRNA: g15532, Three_prime_utr: PAC:26898088.three_prime_UTR.1, Three_prime_utr: PAC:26898245.three_prime_UTR.1
chr15	1466287	SNV	1	C	T	10	40	25	0.3	37.3	Gene: g15492, mRNA: g15492	g15492:c.3838-1864C>T
chr15	1432322	SNV	1	T	C	6	24	25	0	34.1667	Gene: g15490, mRNA: g15490, Three_prime_utr: PAC:26898086.three_prime_UTR.1
chr15	107798	SNV	1	T	C	7	28	25	0.285714	35.5	Gene: g15309, mRNA: g15309, Three_prime_utr: PAC:26898347.three_prime_UTR.1
chr15	107800	SNV	1	A	C	7	28	25	0.285714	35.5	Gene: g15309, mRNA: g15309, Three_prime_utr: PAC:26898347.three_prime_UTR.1
chr15	1420401	SNV	1	G	A	5	20	25	0.2	36.4
chr15	1425680	SNV	1	G	A	24	96	25	0.375	35.875
chr15	1484780	SNV	1	C	T	5	20	25	0.4	35.8
chr15	1752419	SNV	1	G	A	16	64	25	0.5	35.1875
chr16	3943968	SNV	1	T	C	10	40	25	0	36.6	Gene: g16214, mRNA: g16214	g16214:c.416+277T>C
chr16	891011	SNV	1	G	T	5	20	25	0.4	34.2	Gene: Cre16.g648200, Gene: g15688, mRNA: Cre16.g648200, mRNA: g15688	Cre16.g648200:c.[807+279C>A]; g15688:c.[807+279C>A]
chr16	6741024	SNV	1	G	C	7	28	25	0	36.2857	CDS: g16707, Gene: g16707, mRNA: g16707	g16707:c.782C>G	g16707:p.Pro261Arg
chr16	3421827	SNV	1	T	G	6	24	25	0	34.8333	CDS: g16111, Gene: g16111, mRNA: g16111	g16111:c.385T>G	g16111:p.Phe129Val
chr16	3264040	Deletion	1	G	-	7	28	25	0.142857	37.1429
chr16	3942564	SNV	1	C	T	6	24	25	0.166667	35.3333
chr16	5456398	SNV	1	A	T	7	28	25	0.428571	35.7143
chr17	4884558	Insertion	14	-	GCTTAAGTGCTTAA	8	32	25	0.375	37.2232	Gene: Cre17.g734300, Gene: g17754, Five_prime_utr: PAC:26896986.five_prime_UTR.1, Five_prime_utr: PAC:26896987.five_prime_UTR.1, mRNA: Cre17.g734300, mRNA: g17754
chr17	3982777	Deletion	1	C	-	5	20	25	0.4	28.2	Gene: Cre17.g728800, mRNA: Cre17.g728800	Cre17.g728800:c.693+7delG
chr17	3136327	SNV	1	A	G	9	36	25	0.111111	35.4444	Gene: Cre17.g721550, Gene: g17457, mRNA: Cre17.g721550, mRNA: g17457	Cre17.g721550:c.[118-115T>C]; g17457:c.[118-115T>C]
chr17	1966709	Deletion	1	C	-	5	20	25	0	30.6	Gene: Cre17.g710881, mRNA: Cre17.g710881, Three_prime_utr: PAC:26896683.three_prime_UTR.3
chr17	6315178	SNV	1	G	T	6	24	25	0.333333	36.3333	CDS: g17964, Gene: g17964, mRNA: g17964	g17964:c.422C>A	g17964:p.Ser141*
chr17	4596656	SNV	1	C	T	5	20	25	0	35.8	CDS: g17715, Gene: g17715, mRNA: g17715	g17715:c.1497C>T
chr17	978783	SNV	1	A	T	8	32	25	0.25	38.875
chr17	985002	SNV	1	C	T	11	44	25	0.333333	34.9167
chr17	6132327	Insertion	3	-	GAC	13	52	25	0.461538	33.4615
chr2	8151270	SNV	1	T	G	129	516	25	0.457143	35.3571	Gene: g2688, mRNA: g2688, mRNA: g2688, Three_prime_utr: PAC:26899741.three_prime_UTR.2, Three_prime_utr: PAC:26899742.three_prime_UTR.2
chr2	8162166	Deletion	4	ACAC	-	6	24	25	0.5	28	Gene: g2688, mRNA: g2688, mRNA: g2688	g2688:c.[1327+168_1327+171delGTGT];[1564+168_1564+171delGTGT]
chr2	126570	SNV	1	T	C	21	84	25	0.380952	36.381	Gene: Cre02.g074150, Gene: g1315, mRNA: Cre02.g074150, mRNA: g1315, Three_prime_utr: PAC:26900069.three_prime_UTR.1, Three_prime_utr: PAC:26900068.three_prime_UTR.1
chr2	8197631	SNV	1	G	A	6	24	25	0.5	38.3333	CDS: g2692, Gene: g2692, mRNA: g2692	g2692:c.1455C>T
chr2	2642430	SNV	1	A	T	8	32	25	0.375	37.375	CDS: g1755, Gene: g1755, mRNA: g1755	g1755:c.1340A>T	g1755:p.Tyr447Phe
chr2	8909674	SNV	1	A	G	5	20	25	0.2	37.2
chr3	4677447	Deletion	1	G	-	5	20	25	0.2	36.4	Gene: Cre03.g177650, mRNA: Cre03.g177650	Cre03.g177650:c.78+75delG
chr3	6839272	SNV	1	C	T	12	48	25	0.416667	34.8333	CDS: Cre03.g198250, Gene: Cre03.g198250, mRNA: Cre03.g198250	Cre03.g198250:c.121G>A	Cre03.g198250:p.Ala41Thr
chr4	589193	SNV	1	A	G	7	28	25	0	37	Gene: g4569, mRNA: g4569	g4569:c.1155+37T>C
chr4	475781	SNV	1	C	T	7	28	25	0	36.4286
chr4	936765	SNV	1	G	A	7	28	25	0.428571	36.4286
chr4	936917	SNV	1	C	T	5	20	25	0.2	35.4
chr5	2917068	SNV	1	G	A	12	48	25	0.333333	35.5833	Gene: Cre05.g238140, mRNA: Cre05.g238140, Three_prime_utr: PAC:26897690.three_prime_UTR.1
chr5	2917074	SNV	1	T	A	11	44	25	0.272727	36.6364	Gene: Cre05.g238140, mRNA: Cre05.g238140, Three_prime_utr: PAC:26897690.three_prime_UTR.1
chr5	2917075	SNV	1	C	T	11	44	25	0.272727	36.6364	Gene: Cre05.g238140, mRNA: Cre05.g238140, Three_prime_utr: PAC:26897690.three_prime_UTR.1
chr5	2395398	SNV	1	T	C	5	20	25	0.4	33.8
chr6	797489	SNV	1	C	T	7	28	25	0.428571	35.4286	Gene: g5714, Five_prime_utr: PAC:26894052.five_prime_UTR.1, mRNA: g5714
chr6	5513144	SNV	1	A	C	5	20	25	0.4	34.2	Gene: Cre06.g284850, Gene: g6623, mRNA: Cre06.g284850, mRNA: g6623	Cre06.g284850:c.[1335+63T>G]; g6623:c.[1335+63T>G]
chr6	3506634	SNV	1	G	T	6	24	25	0.5	38.3333
chr6	3506635	SNV	1	G	C	6	24	25	0.5	38.3333
chr6	3510439	SNV	1	C	T	8	32	25	0.4	33.3
chr6	4701343	SNV	1	G	A	5	20	25	0	38.8
chr7	4631708	SNV	1	T	G	12	48	25	0.416667	34	Gene: g8011, mRNA: g8011, Three_prime_utr: PAC:26889070.three_prime_UTR.1
chr7	4631710	SNV	1	C	T	12	48	25	0.416667	34	Gene: g8011, mRNA: g8011, Three_prime_utr: PAC:26889070.three_prime_UTR.1
chr7	3080443	SNV	1	G	A	5	20	25	0.166667	37	Gene: g7759, mRNA: g7759, Three_prime_utr: PAC:26890013.three_prime_UTR.1
chr7	1910383	SNV	1	T	C	5	20	25	0.4	34.4	Gene: g7559, mRNA: g7559	g7559:c.319+397T>C
chr7	1133354	Deletion	3	CAA	-	7	28	25	0.285714	30.4286
chr7	3549487	SNV	1	T	A	12	48	25	0.25	35.6667
chr7	3549488	SNV	1	T	G	12	48	25	0.25	35.6667
chr8	3404561	SNV	1	C	T	23	92	25	0.347826	34.1304	Gene: Cre08.g374600, mRNA: Cre08.g374600	Cre08.g374600:c.860-203G>A
chr8	585648	SNV	1	T	C	6	24	25	0	37	Gene: Cre08.g359567, Gene: g8422, mRNA: Cre08.g359567, mRNA: g8422	g8422:c.[1978-283T>C]; Cre08.g359567:c.[1978-286T>C]
chr8	3761933	SNV	1	T	G	5	20	25	0.2	35.2
chr9	2354129	SNV	1	C	T	5	20	25	0.166667	36.5	Gene: Cre09.g392050, Gene: g9451, mRNA: Cre09.g392050, mRNA: g9451	g9451:c.[534+103G>A]; Cre09.g392050:c.[537+103G>A]
chr9	317706	SNV	1	T	A	21	84	25	0.318182	35.1818
chr9	327382	SNV	1	C	A	5	20	25	0.333333	36.6667
scaffold_21	53590	SNV	1	G	C	9	36	25	0	38.7778
scaffold_21	76453	SNV	1	C	T	6	24	25	0.428571	35.8571
scaffold_22	11998	SNV	1	C	G	5	20	25	0.2	36
scaffold_22	12731	SNV	1	A	C	6	24	25	0	36.3333
scaffold_22	123549	SNV	1	C	A	34	136	25	0.411765	36.8235
scaffold_40	11593	SNV	1	G	A	10	40	25	0.1	36.2	CDS: g18382, Gene: g18382, mRNA: g18382	g18382:c.2232G>A
scaffold_44	1414	SNV	1	A	T	7	28	25	0.142857	37.5714
scaffold_44	1488	SNV	1	G	A	10	40	25	0.454545	34.8182
chr8	3067072	SNV	1	A	T	27	109	24.7706	0.448276	36.931
chr12	888801	SNV	1	A	G	24	97	24.7423	0.4	36.76
chr11	3346148	SNV	1	T	C	23	93	24.7312	0.434783	36.2174
chr13	3482256	SNV	1	G	T	19	77	24.6753	0.421053	35.5789	Gene: Cre13.g587700, mRNA: Cre13.g587700	Cre13.g587700:c.647+309G>T
scaffold_21	95418	SNV	1	A	G	37	150	24.6667	0.378378	37.3919
chr15	247235	SNV	1	C	G	18	73	24.6575	0.333333	33.4444
chr17	4971424	SNV	1	G	A	18	73	24.6575	0.473684	35.5263
chr2	7866995	SNV	1	G	A	49	199	24.6231	0.0612245	35.0816	Gene: Cre02.g141700, mRNA: Cre02.g141700	Cre02.g141700:c.1730+776G>A
chr6	4759062	SNV	1	A	G	16	65	24.6154	0.294118	36.3529
chr7	3550067	SNV	1	G	A	16	65	24.6154	0.25	35.9375
chr10	4953667	SNV	1	G	A	15	61	24.5902	0.333333	33.2
chr11	420075	SNV	1	A	G	15	61	24.5902	0.133333	36	Gene: g11514, mRNA: g11514	g11514:c.172-47A>G
chr9	5442814	SNV	1	T	C	15	61	24.5902	0.235294	38.2941
chr13	685	SNV	1	A	G	14	57	24.5614	0.285714	38.1071
chr12	6652894	SNV	1	A	C	26	106	24.5283	0.384615	35.8654	Gene: g13266, mRNA: g13266	g13266:c.22+423T>G
chr12	6652896	SNV	1	A	G	26	106	24.5283	0.384615	35.8654	Gene: g13266, mRNA: g13266	g13266:c.22+421T>C
chr13	4231938	SNV	1	G	A	13	53	24.5283	0.285714	35.7143
chr16	3002072	Deletion	1	C	-	24	98	24.4898	0.458333	31.125	Gene: Cre16.g664600, Five_prime_utr: PAC:26892177.five_prime_UTR.1, mRNA: Cre16.g664600
chr17	965436	SNV	1	A	C	12	49	24.4898	0.166667	36.8333	Gene: g17044, mRNA: g17044, Three_prime_utr: PAC:26896860.three_prime_UTR.1
chr3	6950283	SNV	1	G	C	12	49	24.4898	0.25	35.5
chr4	590598	SNV	1	T	C	12	49	24.4898	0.333333	35.5	Gene: g4569, mRNA: g4569	g4569:c.829+20A>G
chr7	2576652	SNV	1	C	G	12	49	24.4898	0.166667	35.8056	CDS: Cre07.g329900, Gene: Cre07.g329900, mRNA: Cre07.g329900	Cre07.g329900:c.927C>G
chr7	2576654	SNV	1	T	C	12	49	24.4898	0.166667	35.8056	CDS: Cre07.g329900, Gene: Cre07.g329900, mRNA: Cre07.g329900	Cre07.g329900:c.929T>C	Cre07.g329900:p.Met310Thr
chr7	2576655	SNV	1	G	A	12	49	24.4898	0.166667	35.8056	CDS: Cre07.g329900, Gene: Cre07.g329900, mRNA: Cre07.g329900	Cre07.g329900:c.930G>A	Cre07.g329900:p.Met310Thr
chr16	831382	SNV	1	A	G	23	94	24.4681	0.291667	33.2083	Gene: g15677, mRNA: g15677, mRNA: g15677
chr15	1751493	SNV	1	T	C	11	45	24.4444	0.272727	35.1818
chr3	6949997	SNV	1	C	T	11	45	24.4444	0.153846	34.3077
chr6	4755632	SNV	1	G	T	11	45	24.4444	0.454545	37.0909
chr9	7436089	SNV	1	G	A	11	45	24.4444	0.454545	34.3636	Gene: g10241, mRNA: g10241	g10241:c.1441+5G>A
scaffold_23	51986	SNV	1	T	A	43	176	24.4318	0.186047	36.4186
scaffold_19	168635	SNV	1	T	A	21	86	24.4186	0.428571	35.381	Gene: g18140, Five_prime_utr: PAC:26892925.five_prime_UTR.1, mRNA: g18140
chr17	984998	SNV	1	C	T	10	41	24.3902	0.454545	34.5455
chr3	5386952	SNV	1	G	A	20	82	24.3902	0.0952381	35.9524
chr4	2563634	Deletion	1	C	-	10	41	24.3902	0.4	27.7
chr16	724264	SNV	1	G	T	19	78	24.359	0.4	35.2	Gene: Cre16.g691177, Gene: g15661, mRNA: Cre16.g691177, mRNA: g15661, Three_prime_utr: PAC:26891746.three_prime_UTR.1, Three_prime_utr: PAC:26891745.three_prime_UTR.1
chr13	4458990	SNV	1	T	C	9	37	24.3243	0.111111	37.2222	Gene: Cre13.g603450, Five_prime_utr: PAC:26898659.five_prime_UTR.1, mRNA: Cre13.g603450
chr14	553	SNV	1	A	G	9	37	24.3243	0.1	36.1
chr16	4147942	SNV	1	C	A	9	37	24.3243	0.444444	37.5556	CDS: g16253, CDS: g16253, CDS: g16253, Gene: g16253, mRNA: g16253, mRNA: g16253, mRNA: g16253	g16253:c.[230C>A];[230C>A];[230C>A]	g16253:p.[Thr77Lys];[Thr77Lys];[Thr77Lys]
chr16	4147943	SNV	1	G	A	9	37	24.3243	0.444444	37.5556	CDS: g16253, CDS: g16253, CDS: g16253, Gene: g16253, mRNA: g16253, mRNA: g16253, mRNA: g16253	g16253:c.[231G>A];[231G>A];[231G>A]	g16253:p.[Thr77Lys];[Thr77Lys];[Thr77Lys]
chr16	3428810	SNV	1	C	T	9	37	24.3243	0.4	35.1
chr17	983806	SNV	1	G	A	9	37	24.3243	0.222222	35.3333	Gene: g17047, mRNA: g17047, Three_prime_utr: PAC:26897371.three_prime_UTR.1
chr13	635	SNV	1	T	C	53	218	24.3119	0.407407	36.1296
chr15	1484545	SNV	1	C	G	26	107	24.2991	0.4375	36.1562
chr2	8151715	SNV	1	T	G	17	70	24.2857	0.0588235	34.2353	Gene: g2688, mRNA: g2688, mRNA: g2688
chr5	45837	SNV	1	T	C	17	70	24.2857	0.411765	36.6471
scaffold_30	12810	SNV	1	A	G	17	70	24.2857	0.0588235	36.0588	CDS: g18326, Gene: g18326, mRNA: g18326	g18326:c.329T>C	g18326:p.Met110Thr
chr17	4139293	SNV	1	T	C	8	33	24.2424	0.125	35.875	Gene: Cre17.g729700, mRNA: Cre17.g729700	Cre17.g729700:c.1996-135A>G
chr4	2331060	SNV	1	T	C	8	33	24.2424	0.375	36.25	Gene: Cre04.g220750, mRNA: Cre04.g220750, Three_prime_utr: PAC:26905548.three_prime_UTR.1
chr4	212875	SNV	1	G	A	8	33	24.2424	0.25	37.5
chr6	6862387	SNV	1	T	C	8	33	24.2424	0.375	36.875
chr6	6862389	SNV	1	G	T	8	33	24.2424	0.375	36.875
chr9	2357768	SNV	1	A	G	8	33	24.2424	0.4	36.2	Gene: Cre09.g392000, Gene: g9452, mRNA: Cre09.g392000, mRNA: g9452	Cre09.g392000:c.[537-6A>G]; g9452:c.[537-6A>G]
scaffold_23	22900	SNV	1	C	A	8	33	24.2424	0.222222	36
chr2	8740566	SNV	1	A	C	23	95	24.2105	0.347826	37.1739
chr8	3112241	SNV	1	A	C	46	190	24.2105	0.333333	35.9608
chr15	1636502	SNV	1	G	T	37	153	24.183	0.432432	35.6216
chr10	3544279	SNV	1	A	G	7	29	24.1379	0.428571	33.4286	CDS: g10949, Gene: g10949, mRNA: g10949	g10949:c.3687T>C
chr10	6573061	SNV	1	A	G	14	58	24.1379	0.5	37.7857
chr12	906618	SNV	1	C	T	7	29	24.1379	0.142857	34.7143	Gene: g12149, mRNA: g12149	g12149:c.4442-9G>A
chr12	685851	Deletion	3	TCC	-	7	29	24.1379	0.428571	32	Gene: g12114, mRNA: g12114	g12114:c.276+74_276+76delGGA
chr12	888708	SNV	1	C	T	14	58	24.1379	0.142857	35.0714
chr16	3264038	SNV	1	A	C	7	29	24.1379	0.142857	37.2857
chr17	3575941	SNV	1	C	A	7	29	24.1379	0.142857	35.8571	Gene: Cre17.g725600, mRNA: Cre17.g725600	Cre17.g725600:c.966+32G>T
chr17	6362383	SNV	1	A	C	7	29	24.1379	0.142857	34
chr2	8196819	SNV	1	A	G	7	29	24.1379	0	36.4286	Gene: g2692, mRNA: g2692, Three_prime_utr: PAC:26899558.three_prime_UTR.1
chr5	161552	SNV	1	G	T	7	29	24.1379	0	34.1429	Gene: g5084, mRNA: g5084, Three_prime_utr: PAC:26897863.three_prime_UTR.1
chr5	161604	SNV	1	C	A	7	29	24.1379	0.285714	36.1429	Gene: g5084, mRNA: g5084, Three_prime_utr: PAC:26897863.three_prime_UTR.1
scaffold_22	122438	SNV	1	T	C	14	58	24.1379	0.470588	37.7059
scaffold_25	68438	Insertion	1	-	T	7	29	24.1379	0.142857	35.4286
scaffold_29	34726	SNV	1	A	G	14	58	24.1379	0.0714286	36.7857
scaffold_38	333	SNV	1	C	T	27	112	24.1071	0.296296	34.3519
scaffold_38	334	SNV	1	C	T	27	112	24.1071	0.296296	34.3519
chr7	3550250	SNV	1	C	G	45	187	24.0642	0.413043	35.5652
chr12	6647082	SNV	1	T	G	51	212	24.0566	0.425926	35.537
chr9	2355713	SNV	1	C	G	51	212	24.0566	0.365385	36.0192	Gene: Cre09.g392050, Gene: g9451, Five_prime_utr: PAC:26894993.five_prime_UTR.1, Five_prime_utr: PAC:26894994.five_prime_UTR.1, mRNA: Cre09.g392050, mRNA: g9451
chr2	7868076	SNV	1	C	A	44	183	24.0437	0.363636	35.4318	Gene: Cre02.g141700, mRNA: Cre02.g141700	Cre02.g141700:c.1730+1857C>A
chr2	7868302	SNV	1	T	G	37	154	24.026	0.432432	36.1081	Gene: Cre02.g141700, mRNA: Cre02.g141700	Cre02.g141700:c.1731-2054T>G
chr1	6536021	SNV	1	C	G	6	25	24	0	37.3333
chr1	7184502	SNV	1	T	A	6	25	24	0.166667	35.8333
chr10	4051680	SNV	1	A	G	6	25	24	0	38.0833
chr10	4051681	SNV	1	A	G	6	25	24	0	38.0833
chr10	6573030	SNV	1	C	T	18	75	24	0.277778	34.5
chr12	902100	SNV	1	G	A	6	25	24	0	37
chr15	1430329	SNV	1	T	A	6	25	24	0.5	36.6667	Gene: g15490, mRNA: g15490, Three_prime_utr: PAC:26898086.three_prime_UTR.1
chr15	1409702	SNV	1	G	A	12	50	24	0.384615	34.2308
chr15	1752440	SNV	1	G	C	18	75	24	0.388889	35.2222
chr3	7139711	SNV	1	G	T	6	25	24	0.166667	39.3333
chr5	2943029	Insertion	1	-	G	6	25	24	0	38.8333	Gene: g5485, mRNA: g5485	g5485:c.1566+120_1566+121insC
chr5	2943049	Insertion	1	-	G	6	25	24	0	36.5	Gene: g5485, mRNA: g5485	g5485:c.1566+100_1566+101insC
chr7	4385743	SNV	1	G	T	6	25	24	0.333333	37	CDS: Cre07.g341100, CDS: g7973, Gene: Cre07.g341100, Gene: g7973, mRNA: Cre07.g341100, mRNA: g7973	Cre07.g341100:c.[193G>T]; g7973:c.[193G>T]	Cre07.g341100:p.[Ala65Ser]; g7973:p.[Ala65Ser]
chr7	2576544	SNV	1	G	C	6	25	24	0	34.6667	CDS: Cre07.g329900, Gene: Cre07.g329900, mRNA: Cre07.g329900	Cre07.g329900:c.819G>C
chr8	3068775	SNV	1	G	A	12	50	24	0.461538	35.3077
chr9	4976308	Deletion	2	GT	-	6	25	24	0.166667	27.1667	Gene: g9878, mRNA: g9878	g9878:c.1231-36_1231-35delAC
scaffold_22	122560	SNV	1	A	T	53	221	23.9819	0.0377358	35.1887
chr6	2217217	Insertion	1	-	T	35	146	23.9726	0.371429	35.9143	Gene: g5976, mRNA: g5976, Three_prime_utr: PAC:26893703.three_prime_UTR.1
chr9	636197	SNV	1	A	G	17	71	23.9437	0.470588	33.8235	Gene: Cre09.g403350, mRNA: Cre09.g403350, Three_prime_utr: PAC:26895964.three_prime_UTR.1
chr8	3070252	SNV	1	G	A	62	259	23.9382	0.421875	34.375
chr2	1848599	Insertion	2	-	TG	11	46	23.913	0.454545	36.3182	Gene: Cre02.g087300, mRNA: Cre02.g087300	Cre02.g087300:c.423-4_423-3insTG
chr9	3384418	SNV	1	G	A	11	46	23.913	0.181818	34.5455	Gene: g9624, mRNA: g9624	g9624:c.1171-297C>T
chr9	635420	SNV	1	C	T	11	46	23.913	0.5	36.3333	Gene: Cre09.g403350, mRNA: Cre09.g403350, Three_prime_utr: PAC:26895964.three_prime_UTR.1
scaffold_39	22163	SNV	1	C	T	192	804	23.8806	0.078125	34.776
scaffold_39	22164	SNV	1	C	T	192	804	23.8806	0.078125	34.776
chr1	6667384	Deletion	1	C	-	5	21	23.8095	0.2	30.8	Gene: Cre01.g047850, mRNA: Cre01.g047850	Cre01.g047850:c.352+32delG
chr1	5867775	SNV	1	T	A	5	21	23.8095	0.4	36.4
chr11	505459	SNV	1	G	A	5	21	23.8095	0	35	Gene: g11527, mRNA: g11527	g11527:c.700-87C>T
chr12	978175	SNV	1	A	G	15	63	23.8095	0.333333	36.7333	Gene: g12152, mRNA: g12152, mRNA: g12152	g12152:c.[5117+118T>C];[7577+118T>C]
chr12	901497	SNV	1	T	C	15	63	23.8095	0.466667	36.4667	Gene: g12148, mRNA: g12148, Three_prime_utr: PAC:26907483.three_prime_UTR.1
chr12	7893142	Deletion	2	GT	-	5	21	23.8095	0	31.6	Gene: Cre12.g552700, mRNA: Cre12.g552700	Cre12.g552700:c.3174+99_3174+100delGT
chr15	1467714	SNV	1	C	T	5	21	23.8095	0.2	37	Gene: g15492, mRNA: g15492	g15492:c.3838-437C>T
chr15	1423053	SNV	1	G	A	5	21	23.8095	0.2	36.4
chr15	1423602	SNV	1	A	G	10	42	23.8095	0.1	36.3
chr16	5321743	Deletion	2	CA	-	5	21	23.8095	0.4	27.4	Gene: Cre16.g682200, mRNA: Cre16.g682200	Cre16.g682200:c.255+48_255+49delTG
chr16	2703186	Deletion	2	AC	-	5	21	23.8095	0.2	28.6	Gene: Cre16.g662350, mRNA: Cre16.g662350	Cre16.g662350:c.3892-91_3892-90delAC
chr16	3281605	SNV	1	G	C	5	21	23.8095	0.166667	35.5
chr16	3281620	SNV	1	T	G	5	21	23.8095	0	36
chr17	3890701	Deletion	2	CA	-	5	21	23.8095	0.4	24.4	Gene: Cre17.g728250, mRNA: Cre17.g728250	Cre17.g728250:c.399+32_399+33delTG
chr17	3052887	Deletion	1	G	-	5	21	23.8095	0.4	28.8	Gene: Cre17.g720700, Gene: g17442, mRNA: Cre17.g720700, mRNA: g17442	g17442:c.[1816-68delC]; Cre17.g720700:c.[1816-68delC]
chr17	4975001	SNV	1	A	C	5	21	23.8095	0	38.4
chr2	2342930	SNV	1	G	T	5	21	23.8095	0	33.4	CDS: Cre02.g090850, Gene: Cre02.g090850, mRNA: Cre02.g090850	Cre02.g090850:c.915G>T
chr2	9066891	SNV	1	T	G	5	21	23.8095	0.2	33
chr3	6810602	SNV	1	C	A	5	21	23.8095	0.4	34	Gene: g4107, mRNA: g4107	g4107:c.129-251C>A
chr3	5701095	Insertion	2	-	TG	5	21	23.8095	0.4	36.5
chr4	33884	SNV	1	T	G	5	21	23.8095	0	33.8	Gene: g4495, mRNA: g4495	g4495:c.1843+432A>C
chr4	741744	SNV	1	A	G	10	42	23.8095	0	37.2	CDS: g4593, Gene: g4593, mRNA: g4593	g4593:c.20A>G	g4593:p.Glu7Gly
chr4	741671	SNV	1	C	A	5	21	23.8095	0.4	35.3	CDS: g4593, Gene: g4593, mRNA: g4593	g4593:c.16C>A	g4593:p.His6Thr
chr4	741672	SNV	1	A	C	5	21	23.8095	0.4	35.3	CDS: g4593, Gene: g4593, mRNA: g4593	g4593:c.17A>C	g4593:p.His6Thr
chr4	2563636	Deletion	1	C	-	10	42	23.8095	0.4	27.4
chr6	6333935	Deletion	2	TG	-	5	21	23.8095	0.4	32.2	Gene: Cre06.g291900, mRNA: Cre06.g291900	Cre06.g291900:c.538-96_538-95delTG
chr6	4606167	SNV	1	C	T	5	21	23.8095	0.2	38.8	CDS: g6443, Gene: g6443, mRNA: g6443	g6443:c.3046C>T
chr6	4567964	SNV	1	G	A	5	21	23.8095	0.166667	36.5
chr6	8634464	SNV	1	T	C	20	84	23.8095	0.4	36.5
chr8	564456	SNV	1	G	A	5	21	23.8095	0.4	38	Gene: Cre08.g359450, mRNA: Cre08.g359450	Cre08.g359450:c.994-441C>T
chr8	3192968	SNV	1	T	G	5	21	23.8095	0	38.6
chr9	7436046	SNV	1	A	C	5	21	23.8095	0.5	36.5	CDS: g10241, Gene: g10241, mRNA: g10241	g10241:c.1403A>C	g10241:p.Tyr468Ser
scaffold_27	37791	Deletion	6	TTTTTT	-	5	21	23.8095	0	35.8
chr15	1636807	SNV	1	C	T	29	122	23.7705	0.333333	36.8333
chr2	8310260	Deletion	4	TAAA	-	19	80	23.75	0.421053	31.1579
chr15	1429100	Deletion	1	A	-	9	38	23.6842	0.444444	30.1111	Gene: g15490, mRNA: g15490
chr15	111520	Deletion	1	G	-	9	38	23.6842	0.444444	31.5556	Gene: g15310, mRNA: g15310, Three_prime_utr: PAC:26898246.three_prime_UTR.1
chr16	4037926	SNV	1	C	G	9	38	23.6842	0.444444	36.2222	CDS: g16226, Gene: g16226, mRNA: g16226	g16226:c.2292C>G
chr16	4037927	SNV	1	G	T	9	38	23.6842	0.444444	36.2222	CDS: g16226, Gene: g16226, mRNA: g16226	g16226:c.2293G>T	g16226:p.Asp765Tyr
chr17	3136316	Deletion	1	G	-	9	38	23.6842	0.111111	36.2222	Gene: Cre17.g721550, Gene: g17457, mRNA: Cre17.g721550, mRNA: g17457	Cre17.g721550:c.[118-104delC]; g17457:c.[118-104delC]
chr17	789435	SNV	1	G	A	9	38	23.6842	0.444444	36	CDS: g17012, Gene: g17012, mRNA: g17012	g17012:c.957G>A	g17012:p.Trp319*
chr2	8979511	SNV	1	G	C	9	38	23.6842	0.333333	36.7778	CDS: g2806, Gene: g2806, mRNA: g2806	g2806:c.1519C>G	g2806:p.Leu507Val
chr2	7999938	SNV	1	C	T	9	38	23.6842	0	38.8889
chr2	8316432	SNV	1	G	T	9	38	23.6842	0.444444	35
chr5	2436624	SNV	1	C	T	9	38	23.6842	0	35.7778
chr12	888893	SNV	1	G	A	22	93	23.6559	0.409091	35.9091
chr4	2305096	SNV	1	G	A	22	93	23.6559	0.347826	35.8261	Gene: g4809, Five_prime_utr: PAC:26905718.five_prime_UTR.1, mRNA: g4809
chr9	7446529	SNV	1	T	C	22	93	23.6559	0.454545	35.6818
chr14	522116	SNV	1	T	G	13	55	23.6364	0.153846	35.4615	Gene: Cre14.g611450, mRNA: Cre14.g611450, Three_prime_utr: PAC:26890822.three_prime_UTR.1
chr5	2917124	Deletion	1	C	-	13	55	23.6364	0.384615	37.6154	Gene: Cre05.g238140, mRNA: Cre05.g238140, Three_prime_utr: PAC:26897690.three_prime_UTR.1
chr9	953668	SNV	1	G	A	13	55	23.6364	0.307692	36.9231	Gene: Cre09.g400900, mRNA: Cre09.g400900, Three_prime_utr: PAC:26895233.three_prime_UTR.1
scaffold_21	134138	SNV	1	C	T	13	55	23.6364	0.230769	36.7692
chr14	2692032	SNV	1	A	T	30	127	23.622	0.433333	36.1	Gene: g15090, mRNA: g15090	g15090:c.195-58T>A
chr16	392722	SNV	1	C	T	17	72	23.6111	0.352941	36.1765	Gene: g15606, Gene: Cre16.g693600, mRNA: g15606, mRNA: Cre16.g693600, Three_prime_utr: PAC:26891548.three_prime_UTR.1, Three_prime_utr: PAC:26891547.three_prime_UTR.1
chr2	8067585	SNV	1	T	C	84	356	23.5955	0.384615	34.9451	Gene: g2687, Gene: g2688, mRNA: g2687, mRNA: g2687, mRNA: g2687, mRNA: g2688, mRNA: g2688, Three_prime_utr: PAC:26899741.three_prime_UTR.3, Three_prime_utr: PAC:26899742.three_prime_UTR.3
chr2	9084729	SNV	1	C	G	41	174	23.5632	0.195122	36.8293
chr15	1412753	SNV	1	C	T	12	51	23.5294	0.25	35.6667
chr17	981241	SNV	1	G	A	12	51	23.5294	0.25	33.4167
chr5	2941960	SNV	1	C	T	8	34	23.5294	0.444444	36.8889	Gene: g5485, mRNA: g5485	g5485:c.1567-687G>A
chr5	2917190	SNV	1	A	T	8	34	23.5294	0.375	36	Gene: Cre05.g238140, mRNA: Cre05.g238140, Three_prime_utr: PAC:26897690.three_prime_UTR.1
chr6	3506587	SNV	1	G	A	8	34	23.5294	0.111111	36.7778
chr8	3161875	Insertion	3	-	GAT	12	51	23.5294	0.166667	36.4167
scaffold_22	88209	SNV	1	G	A	8	34	23.5294	0.25	36
chr3	6949986	SNV	1	C	T	15	64	23.4375	0.125	34.625
chr12	684031	SNV	1	C	A	11	47	23.4043	0.454545	36.8182	CDS: g12114, Gene: g12114, mRNA: g12114	g12114:c.1725G>T
chr12	6762226	SNV	1	C	T	11	47	23.4043	0.181818	36.2727
chr2	8196206	SNV	1	G	T	22	94	23.4043	0.318182	35.2727
chr4	3873184	Insertion	4	-	GTAT	11	47	23.4043	0.272727	37.75	Gene: g5041, mRNA: g5041, Three_prime_utr: PAC:26906141.three_prime_UTR.1
chr8	3522475	SNV	1	A	C	11	47	23.4043	0.272727	34.4545	Gene: Cre08.g375200, Gene: g8840, mRNA: Cre08.g375200, mRNA: g8840	Cre08.g375200:c.[904-633A>C]; g8840:c.[904-633A>C]
chr9	322673	SNV	1	T	C	11	47	23.4043	0.272727	36.1818
chr9	326543	SNV	1	C	T	11	47	23.4043	0.181818	36.6364
scaffold_22	98832	Deletion	1	A	-	11	47	23.4043	0.272727	27.4545
scaffold_22	122203	SNV	1	A	C	11	47	23.4043	0.357143	36.5714
chr16	3951906	SNV	1	A	T	18	77	23.3766	0.210526	36.9474
scaffold_19	168622	Deletion	1	C	-	18	77	23.3766	0.444444	30.1111	Gene: g18140, Five_prime_utr: PAC:26892925.five_prime_UTR.1, mRNA: g18140
chr12	6558304	SNV	1	G	T	7	30	23.3333	0.142857	36
chr14	3540297	SNV	1	A	C	7	30	23.3333	0	38.4286	Gene: g15203, mRNA: g15203, mRNA: g15203	g15203:c.[574-263T>G];[637-263T>G]
chr14	2114777	SNV	1	G	A	7	30	23.3333	0	35.2857
chr15	1429978	SNV	1	C	T	14	60	23.3333	0.428571	35.8571	CDS: g15490, Gene: g15490, mRNA: g15490	g15490:c.13C>T	g15490:p.Arg5*
chr2	9074375	SNV	1	A	T	7	30	23.3333	0.285714	36.7143	Gene: g2824, mRNA: g2824, Three_prime_utr: PAC:26900537.three_prime_UTR.1
chr3	9176183	SNV	1	G	A	7	30	23.3333	0	33.7143	Gene: g4483, mRNA: g4483	g4483:c.412-199C>T
chr5	2941969	Deletion	1	G	-	7	30	23.3333	0.285714	35.1429	Gene: g5485, mRNA: g5485	g5485:c.1567-696delC
chr6	3507806	SNV	1	G	A	7	30	23.3333	0.285714	35.8571	Gene: g6249, mRNA: g6249	g6249:c.93+46C>T
chr6	8815187	SNV	1	T	C	7	30	23.3333	0.285714	33.8571	CDS: Cre06.g310250, Gene: Cre06.g310250, mRNA: Cre06.g310250	Cre06.g310250:c.229A>G	Cre06.g310250:p.Thr77Ala
chr7	2576553	SNV	1	T	C	7	30	23.3333	0	34.8571	CDS: Cre07.g329900, Gene: Cre07.g329900, mRNA: Cre07.g329900	Cre07.g329900:c.828T>C
chr9	323545	SNV	1	T	C	7	30	23.3333	0.5	36
chr9	2355752	SNV	1	A	T	52	223	23.3184	0.320755	35.717
chr12	377590	SNV	1	T	A	10	43	23.2558	0.4	33.2	Gene: Cre12.g494100, mRNA: Cre12.g494100, Three_prime_utr: PAC:26908129.three_prime_UTR.2
chr12	6570206	SNV	1	G	A	10	43	23.2558	0.4	36.1
chr17	3574709	SNV	1	C	T	10	43	23.2558	0.3	35.5	Gene: Cre17.g725600, mRNA: Cre17.g725600	Cre17.g725600:c.1394+93G>A
chr2	9026398	SNV	1	C	A	10	43	23.2558	0.2	34.8	Gene: g2816, mRNA: g2816, Three_prime_utr: PAC:26900232.three_prime_UTR.1
chr5	162454	SNV	1	T	C	10	43	23.2558	0	38.2	Gene: g5084, mRNA: g5084, Three_prime_utr: PAC:26897863.three_prime_UTR.1
chr6	4698794	Deletion	1	C	-	10	43	23.2558	0.2	27.9	Gene: g6450, mRNA: g6450, Three_prime_utr: PAC:26894554.three_prime_UTR.1
scaffold_21	98643	SNV	1	A	C	13	56	23.2143	0	37.2308
chr12	9189865	SNV	1	C	T	16	69	23.1884	0.0625	36.9375	CDS: g13733, CDS: Cre12.g541950, Gene: Cre12.g541950, Gene: g13733, mRNA: Cre12.g541950, mRNA: g13733	Cre12.g541950:c.[748G>A]; g13733:c.[748G>A]	Cre12.g541950:p.[Glu250Lys]; g13733:p.[Glu250Lys]
chr9	317349	SNV	1	C	T	16	69	23.1884	0.411765	36.2941
chr15	1484560	SNV	1	C	T	25	108	23.1481	0.4375	36.5312
chr1	2398887	Deletion	2	GT	-	9	39	23.0769	0.333333	32.4444	Gene: Cre01.g013250, mRNA: Cre01.g013250	Cre01.g013250:c.892+149_892+150delAC
chr10	3540730	Deletion	1	T	-	6	26	23.0769	0.5	32.5
chr11	715626	SNV	1	G	A	6	26	23.0769	0	37.6667	CDS: g11558, Gene: g11558, mRNA: g11558	g11558:c.4C>T	g11558:p.Leu2Phe
chr11	448876	SNV	1	G	C	6	26	23.0769	0.333333	35.6667	CDS: g11519, Gene: g11519, mRNA: g11519	g11519:c.1953C>G
chr12	683995	SNV	1	T	C	12	52	23.0769	0.416667	36	CDS: g12114, Gene: g12114, mRNA: g12114	g12114:c.1761A>G
chr12	6641907	SNV	1	C	G	12	52	23.0769	0.333333	36.5833
chr13	4459007	SNV	1	T	G	9	39	23.0769	0.111111	36.4444	Gene: Cre13.g603450, Five_prime_utr: PAC:26898659.five_prime_UTR.1, mRNA: Cre13.g603450
chr14	522207	SNV	1	A	G	30	130	23.0769	0.4	35.6667	Gene: Cre14.g611450, mRNA: Cre14.g611450, Three_prime_utr: PAC:26890822.three_prime_UTR.1
chr14	2114780	SNV	1	C	T	6	26	23.0769	0	37.3333
chr15	490792	SNV	1	T	C	6	26	23.0769	0.285714	36.4286	CDS: g15357, Gene: g15357, mRNA: g15357	g15357:c.1641A>G
chr15	1409697	SNV	1	T	C	12	52	23.0769	0.384615	35.0769
chr15	1419412	SNV	1	G	A	6	26	23.0769	0.333333	36.1667
chr16	1382238	SNV	1	T	A	9	39	23.0769	0.4	33	Gene: Cre16.g652050, mRNA: Cre16.g652050	Cre16.g652050:c.905-195A>T
chr16	3264055	SNV	1	A	G	6	26	23.0769	0.166667	37.5
chr2	287916	Insertion	2	-	GT	6	26	23.0769	0	36.5833	Gene: g1343, mRNA: g1343, mRNA: g1343	g1343:c.[672+57_672+58insGT];[672+57_672+58insGT]
chr2	8197448	SNV	1	A	G	15	65	23.0769	0.375	35.9375	CDS: g2692, Gene: g2692, mRNA: g2692	g2692:c.1638T>C
chr3	6950231	SNV	1	G	A	6	26	23.0769	0.5	37.5
chr3	6950276	SNV	1	C	T	6	26	23.0769	0.428571	36.4286
chr5	2394948	SNV	1	T	C	9	39	23.0769	0.444444	35.5556
chr6	4602859	SNV	1	G	A	6	26	23.0769	0.166667	35.5	Gene: g6443, mRNA: g6443	g6443:c.8-46G>A
chr8	4650971	SNV	1	T	C	6	26	23.0769	0.166667	35.5	Gene: Cre08.g383550, mRNA: Cre08.g383550	Cre08.g383550:c.1475-525T>C
chr8	4167839	SNV	1	G	A	6	26	23.0769	0.333333	36.3333
chr9	2355873	SNV	1	T	C	54	234	23.0769	0.418182	36.7273
scaffold_22	122477	SNV	1	T	C	9	39	23.0769	0.111111	33.2222
chr8	44759	SNV	1	G	C	576	2500	23.04	0.409917	35.9306
chr8	347953	SNV	1	C	T	20	87	22.9885	0.35	33.3	Gene: g8386, mRNA: g8386, Three_prime_utr: PAC:26888474.three_prime_UTR.1
chr6	4703916	SNV	1	G	T	17	74	22.973	0.117647	37.1176
chr8	44806	SNV	1	T	C	591	2573	22.9693	0.486134	36.6166
chr2	1651513	SNV	1	A	G	14	61	22.9508	0.428571	36
chr12	9002738	SNV	1	G	A	25	109	22.9358	0.32	36.12
chr12	6570203	SNV	1	C	T	11	48	22.9167	0.454545	35
chr14	522111	SNV	1	T	C	11	48	22.9167	0	35.1818	Gene: Cre14.g611450, mRNA: Cre14.g611450, Three_prime_utr: PAC:26890822.three_prime_UTR.1
chr16	3951816	SNV	1	T	C	11	48	22.9167	0.416667	36.0833
chr6	600918	SNV	1	T	G	11	48	22.9167	0	34.8182	Gene: Cre06.g253250, mRNA: Cre06.g253250, Three_prime_utr: PAC:26893651.three_prime_UTR.1
chr8	3161886	SNV	1	G	A	11	48	22.9167	0.272727	36.3636
chr1	649391	SNV	1	C	T	8	35	22.8571	0	35	Gene: g85, mRNA: g85	g85:c.1725+540C>T
chr11	2525682	SNV	1	C	T	8	35	22.8571	0.125	34.625	Gene: Cre11.g475950, Gene: g11822, mRNA: Cre11.g475950, mRNA: g11822	Cre11.g475950:c.[7307-404C>T]; g11822:c.[7307-404C>T]
chr11	3213782	Insertion	8	-	CCGAAGTG	8	35	22.8571	0	35.4531
chr13	797678	Insertion	4	-	GCCG	8	35	22.8571	0.25	35.6562	Gene: Cre13.g567050, mRNA: Cre13.g567050, Three_prime_utr: PAC:26898845.three_prime_UTR.1
chr15	1455489	SNV	1	G	A	8	35	22.8571	0.25	36.375	Gene: g15491, Five_prime_utr: PAC:26898349.five_prime_UTR.1, mRNA: g15491
chr15	1419405	SNV	1	C	A	8	35	22.8571	0.5	37.125
chr15	1751254	SNV	1	C	A	8	35	22.8571	0.125	34.75
chr2	8267987	Deletion	1	T	-	8	35	22.8571	0.375	34.75	Gene: g2703, mRNA: g2703	g2703:c.42-20delT
chr2	9006807	Insertion	3	-	CTA	8	35	22.8571	0.25	36.9167
chr6	6907202	SNV	1	T	C	8	35	22.8571	0	38.375	CDS: g6845, Gene: g6845, mRNA: g6845	g6845:c.1491T>C
chr11	431066	SNV	1	G	C	21	92	22.8261	0.0454545	37.7273	Gene: g11516, Five_prime_utr: PAC:26890377.five_prime_UTR.1, mRNA: g11516
scaffold_47	9199	SNV	1	G	T	13	57	22.807	0.307692	36.0769
scaffold_47	14258	SNV	1	C	T	13	57	22.807	0.357143	36.2143
scaffold_38	59	SNV	1	C	T	49	215	22.7907	0.5	34.7593
chr5	46233	SNV	1	T	C	18	79	22.7848	0.277778	36.3333
chr9	322219	SNV	1	C	A	18	79	22.7848	0.421053	34.5789
chr12	977451	SNV	1	G	A	5	22	22.7273	0	32.8	Gene: g12152, mRNA: g12152, mRNA: g12152	g12152:c.[5118-559C>T];[7578-559C>T]
chr13	16327	SNV	1	T	G	5	22	22.7273	0	34	Gene: Cre13.g561800, mRNA: Cre13.g561800	Cre13.g561800:c.2661-215A>C
chr15	1412630	SNV	1	G	A	25	110	22.7273	0.48	35.36
chr16	3735010	SNV	1	T	C	5	22	22.7273	0	37	Gene: g16176, mRNA: g16176	g16176:c.1234-62A>G
chr16	5454868	SNV	1	C	A	5	22	22.7273	0.2	35.8
chr17	3576687	SNV	1	G	T	5	22	22.7273	0	34.4	CDS: Cre17.g725600, Gene: Cre17.g725600, mRNA: Cre17.g725600	Cre17.g725600:c.559C>A	Cre17.g725600:p.His187Asn
chr17	985001	SNV	1	G	A	10	44	22.7273	0.5	33.2
chr17	2549224	SNV	1	T	C	5	22	22.7273	0	35.4
chr3	4961948	Deletion	2	CA	-	5	22	22.7273	0.4	35.4	Gene: g3729, mRNA: g3729	g3729:c.2901+10_2901+11delTG
chr3	2456707	Deletion	2	TG	-	5	22	22.7273	0.4	27.2	Gene: Cre03.g159350, mRNA: Cre03.g159350, Three_prime_utr: PAC:26902380.three_prime_UTR.1
chr5	2941900	Deletion	1	G	-	10	44	22.7273	0.4	34.9	Gene: g5485, mRNA: g5485	g5485:c.1567-627delC
chr5	1270080	Deletion	1	G	-	5	22	22.7273	0.4	32
chr6	4701371	SNV	1	T	G	5	22	22.7273	0	36.4
chr7	2002701	SNV	1	G	A	5	22	22.7273	0.4	32	Gene: g7573, mRNA: g7573	g7573:c.3856+93C>T
chr7	1167578	Deletion	1	G	-	5	22	22.7273	0.2	32.4
chr8	2279952	SNV	1	T	A	10	44	22.7273	0.5	35
chr9	322947	Deletion	2	CC	-	10	44	22.7273	0	34.3
scaffold_39	7944	Deletion	10	TGAGCCATGC	-	5	22	22.7273	0.4	37.2
scaffold_44	5578	SNV	1	A	G	5	22	22.7273	0.4	38	Gene: g18392, Three_prime_utr: PAC:26892952.three_prime_UTR.1, mRNA: g18392
chr3	6950063	SNV	1	G	A	17	75	22.6667	0.444444	34.7222
scaffold_22	5318	SNV	1	A	T	17	75	22.6667	0	37.5882	Gene: g18200, Five_prime_utr: PAC:26892872.five_prime_UTR.1, mRNA: g18200
chr6	8815152	SNV	1	A	T	12	53	22.6415	0.0833333	34.4167	CDS: Cre06.g310250, Gene: Cre06.g310250, mRNA: Cre06.g310250	Cre06.g310250:c.264T>A
chr11	1439508	SNV	1	A	G	38	168	22.619	0.475	35.25	Gene: g11660, mRNA: g11660, mRNA: g11660
chr9	321805	SNV	1	C	T	19	84	22.619	0.421053	35.3158
chr10	6573194	SNV	1	G	A	14	62	22.5806	0.428571	34.7857
chr11	3730234	SNV	1	T	G	7	31	22.5806	0.428571	36.1429
chr12	1943723	SNV	1	T	A	7	31	22.5806	0.142857	33.8571	Gene: Cre12.g510550, mRNA: Cre12.g510550	Cre12.g510550:c.2220+152A>T
chr13	4351689	SNV	1	C	T	7	31	22.5806	0	36.8571
chr13	4351690	SNV	1	A	G	7	31	22.5806	0	36.8571
chr15	1423582	SNV	1	G	T	7	31	22.5806	0	35.4286
chr16	3944238	SNV	1	G	A	7	31	22.5806	0.285714	37.2857	Gene: g16214, mRNA: g16214	g16214:c.416+547G>A
chr16	4902071	SNV	1	C	T	21	93	22.5806	0.190476	34.5238
chr17	6005375	Insertion	1	-	G	7	31	22.5806	0.285714	36.5714	Gene: Cre17.g740650, mRNA: Cre17.g740650	Cre17.g740650:c.2063-39_2063-38insG
chr4	974208	SNV	1	G	A	7	31	22.5806	0.285714	36.1429
chr4	4090965	Insertion	1	-	A	7	31	22.5806	0.285714	32.8571
chr5	2942346	Deletion	1	G	-	7	31	22.5806	0.285714	38.4286	Gene: g5485, mRNA: g5485	g5485:c.1566+803delC
chr6	3507812	SNV	1	C	T	7	31	22.5806	0.285714	34.1429	Gene: g6249, mRNA: g6249	g6249:c.93+40G>A
chr9	317937	SNV	1	T	C	7	31	22.5806	0.428571	35.7143
chr9	324923	SNV	1	A	C	7	31	22.5806	0	37.1429
chr15	1636816	SNV	1	A	G	34	151	22.5166	0.411765	36.7353
chr10	4954521	SNV	1	C	T	9	40	22.5	0	38.7778
chr7	4494502	SNV	1	G	A	9	40	22.5	0.333333	36.3333	Gene: g7988, mRNA: g7988	g7988:c.237+392G>A
chr7	3549353	SNV	1	A	G	18	80	22.5	0.0555556	36.1111
chr7	3549354	SNV	1	A	C	18	80	22.5	0.0555556	36.1111
chr11	2273841	SNV	1	C	T	1701	7562	22.494	0.422599	34.7887
chr2	7868274	SNV	1	C	T	31	138	22.4638	0.387097	35.7258	Gene: Cre02.g141700, mRNA: Cre02.g141700	Cre02.g141700:c.1730+2055C>T
chr11	1439827	SNV	1	T	G	88	392	22.449	0.466667	36.3889	Gene: g11660, mRNA: g11660, mRNA: g11660, Three_prime_utr: PAC:26890097.three_prime_UTR.3, Three_prime_utr: PAC:26890099.three_prime_UTR.3
chr15	1483726	SNV	1	G	T	11	49	22.449	0.363636	37.2727
chr8	3522453	SNV	1	T	C	11	49	22.449	0.363636	34.2727	Gene: Cre08.g375200, Gene: g8840, mRNA: Cre08.g375200, mRNA: g8840	Cre08.g375200:c.[904-655T>C]; g8840:c.[904-655T>C]
chr12	6647176	SNV	1	G	A	24	107	22.4299	0.0833333	34.7917
chr15	1484550	SNV	1	C	A	24	107	22.4299	0.451613	36.5484
chr17	4971746	SNV	1	C	T	13	58	22.4138	0.5	35.5714
chr2	8197082	SNV	1	T	G	13	58	22.4138	0.428571	36.9286	Gene: g2692, mRNA: g2692, Three_prime_utr: PAC:26899558.three_prime_UTR.1
chr9	5457026	SNV	1	A	T	13	58	22.4138	0.461538	35.3077	Gene: g9954, Five_prime_utr: PAC:26895896.five_prime_UTR.1, mRNA: g9954
chr2	8061966	SNV	1	C	T	54	241	22.4066	0.37931	36.1034	Gene: g2687, Gene: g2688, mRNA: g2687, mRNA: g2687, mRNA: g2687, mRNA: g2688, mRNA: g2688, Three_prime_utr: PAC:26899741.three_prime_UTR.8, Three_prime_utr: PAC:26899742.three_prime_UTR.8
chr4	821470	SNV	1	T	C	30	134	22.3881	0.2	35.1667
chr8	3070446	SNV	1	C	A	36	161	22.3602	0.447368	36.4474
scaffold_22	122645	SNV	1	C	T	19	85	22.3529	0.105263	36.3158
chr2	7868243	SNV	1	G	A	23	103	22.3301	0.434783	35.5652	Gene: Cre02.g141700, mRNA: Cre02.g141700	Cre02.g141700:c.1730+2024G>A
chr2	8066987	SNV	1	G	T	77	345	22.3188	0.454545	36.526	Gene: g2687, Gene: g2688, mRNA: g2687, mRNA: g2687, mRNA: g2687, mRNA: g2688, mRNA: g2688, Three_prime_utr: PAC:26899741.three_prime_UTR.4, Three_prime_utr: PAC:26899742.three_prime_UTR.4
chr2	8066988	SNV	1	T	C	77	345	22.3188	0.454545	36.526	Gene: g2687, Gene: g2688, mRNA: g2687, mRNA: g2687, mRNA: g2687, mRNA: g2688, mRNA: g2688, Three_prime_utr: PAC:26899741.three_prime_UTR.4, Three_prime_utr: PAC:26899742.three_prime_UTR.4
chr2	8067341	SNV	1	C	T	29	130	22.3077	0.225806	35.3548	Gene: g2687, Gene: g2688, mRNA: g2687, mRNA: g2687, mRNA: g2687, mRNA: g2688, mRNA: g2688
chr8	3069431	SNV	1	C	A	43	193	22.2798	0.23913	35.913
chr1	3954125	Deletion	2	GT	-	8	36	22.2222	0.25	34.25	Gene: Cre01.g025750, mRNA: Cre01.g025750	Cre01.g025750:c.312-140_312-139delAC
chr10	3956430	SNV	1	T	C	6	27	22.2222	0	33.1667	Gene: Cre10.g448550, mRNA: Cre10.g448550, Three_prime_utr: PAC:26904814.three_prime_UTR.1
chr11	2367205	SNV	1	C	G	8	36	22.2222	0	35.625
chr12	377580	SNV	1	G	A	8	36	22.2222	0.375	33.625	Gene: Cre12.g494100, mRNA: Cre12.g494100, Three_prime_utr: PAC:26908129.three_prime_UTR.2
chr12	9002732	SNV	1	T	C	24	108	22.2222	0.375	37.6667
chr15	1455548	SNV	1	T	C	8	36	22.2222	0	37.5	Gene: g15491, Five_prime_utr: PAC:26898349.five_prime_UTR.1, mRNA: g15491
chr15	1432207	SNV	1	A	G	8	36	22.2222	0.125	35.375	Gene: g15490, mRNA: g15490, Three_prime_utr: PAC:26898086.three_prime_UTR.1
chr15	1487337	SNV	1	A	G	10	45	22.2222	0.5	37.4
chr15	1751341	SNV	1	G	A	6	27	22.2222	0.166667	37.3333
chr16	3785779	SNV	1	G	C	14	63	22.2222	0.266667	35.5333	CDS: g16184, Gene: g16184, mRNA: g16184	g16184:c.2313C>G
chr17	6005376	SNV	1	T	G	6	27	22.2222	0.333333	37.5	Gene: Cre17.g740650, mRNA: Cre17.g740650	Cre17.g740650:c.2063-37T>G
chr17	6005378	SNV	1	T	G	6	27	22.2222	0.333333	37.5	Gene: Cre17.g740650, mRNA: Cre17.g740650	Cre17.g740650:c.2063-35T>G
chr17	3575917	SNV	1	T	C	6	27	22.2222	0	35.5833	Gene: Cre17.g725600, mRNA: Cre17.g725600	Cre17.g725600:c.966+56A>G
chr17	3575918	SNV	1	C	T	6	27	22.2222	0	35.5833	Gene: Cre17.g725600, mRNA: Cre17.g725600	Cre17.g725600:c.966+55G>A
chr17	789404	SNV	1	C	T	8	36	22.2222	0.5	36.75	CDS: g17012, Gene: g17012, mRNA: g17012	g17012:c.926C>T	g17012:p.Ala309Val
chr17	978754	Deletion	1	T	-	8	36	22.2222	0.25	36.25
chr17	978767	SNV	1	C	T	8	36	22.2222	0.125	37.375
chr17	984948	SNV	1	C	T	12	54	22.2222	0.5	37.75
chr2	8942832	SNV	1	C	T	10	45	22.2222	0	36.4	Gene: g2800, mRNA: g2800, Three_prime_utr: PAC:26900346.three_prime_UTR.1
chr2	8267990	Deletion	1	T	-	8	36	22.2222	0.375	32.875	Gene: g2703, mRNA: g2703	g2703:c.42-17delT
chr2	8268314	SNV	1	T	A	12	54	22.2222	0	36.3333	Gene: g2703, mRNA: g2703	g2703:c.84+265T>A
chr2	8268568	SNV	1	A	G	14	63	22.2222	0.5	35.5	Gene: g2703, mRNA: g2703	g2703:c.85-243A>G
chr2	8197225	SNV	1	C	T	6	27	22.2222	0.5	36.6667	Gene: g2692, mRNA: g2692, Three_prime_utr: PAC:26899558.three_prime_UTR.1
chr2	8268045	SNV	1	T	C	8	36	22.2222	0.222222	36.1111	CDS: g2703, Gene: g2703, mRNA: g2703	g2703:c.80T>C	g2703:p.Leu27Pro
chr2	2569	SNV	1	T	A	20	90	22.2222	0.35	36.2
chr2	1651520	SNV	1	T	C	12	54	22.2222	0.5	35
chr2	8748166	SNV	1	A	G	6	27	22.2222	0	37.8333
chr2	9005554	SNV	1	C	T	46	207	22.2222	0.490196	37.2157
chr3	3526316	SNV	1	T	C	6	27	22.2222	0.333333	35.5
chr4	33902	Insertion	2	-	GG	8	36	22.2222	0.375	35.4375	Gene: g4495, mRNA: g4495	g4495:c.1843+414_1843+415insCC
chr4	823261	SNV	1	C	T	8	36	22.2222	0.25	37.625	CDS: g4610, Gene: g4610, mRNA: g4610	g4610:c.162C>T
chr4	589236	SNV	1	A	G	8	36	22.2222	0.125	37.25	CDS: g4569, Gene: g4569, mRNA: g4569	g4569:c.1149T>C
chr4	475778	SNV	1	T	C	6	27	22.2222	0.166667	34.3333
chr5	27781	SNV	1	C	T	6	27	22.2222	0.166667	36.3333
chr5	1616833	SNV	1	C	T	6	27	22.2222	0.166667	34
chr6	981126	SNV	1	T	C	10	45	22.2222	0.454545	34.9091	CDS: Cre06.g255750, Gene: Cre06.g255750, mRNA: Cre06.g255750	Cre06.g255750:c.59A>G	Cre06.g255750:p.Asn20Ser
chr8	4651053	Deletion	2	TA	-	6	27	22.2222	0	33.8333	Gene: Cre08.g383550, mRNA: Cre08.g383550	Cre08.g383550:c.1475-443_1475-442delTA
chr9	2356335	SNV	1	G	T	14	63	22.2222	0.266667	35.0667	Gene: Cre09.g392000, Gene: g9452, mRNA: Cre09.g392000, mRNA: g9452	Cre09.g392000:c.[153+96G>T]; g9452:c.[153+96G>T]
chr9	318947	SNV	1	G	A	12	54	22.2222	0.25	35.1667
scaffold_21	79455	SNV	1	A	G	8	36	22.2222	0.125	37.5	Gene: g18174, Five_prime_utr: PAC:26906212.five_prime_UTR.1, mRNA: g18174
scaffold_22	98839	SNV	1	A	C	10	45	22.2222	0.181818	32.2727
scaffold_22	122151	Deletion	2	CT	-	8	36	22.2222	0.375	31.5
scaffold_30	48275	SNV	1	T	C	12	54	22.2222	0.25	36.6667
scaffold_38	23714	SNV	1	T	C	6	27	22.2222	0.333333	37.8333
chr12	909660	SNV	1	C	T	25	113	22.1239	0.48	35.32	Gene: g12149, mRNA: g12149	g12149:c.3173-552G>A
chr3	6951563	SNV	1	G	A	46	208	22.1154	0.22	36.64
scaffold_38	24029	SNV	1	A	C	34	154	22.0779	0.114286	36.3143
chr11	2372292	SNV	1	C	G	28	127	22.0472	0	37.7143
chr16	3785776	SNV	1	G	A	13	59	22.0339	0.153846	35.0769	CDS: g16184, Gene: g16184, mRNA: g16184	g16184:c.2316C>T
chr16	3785775	SNV	1	T	C	13	59	22.0339	0.153846	35.0769	CDS: g16184, Gene: g16184, mRNA: g16184	g16184:c.2317A>G	g16184:p.Lys773Glu
chr12	974901	Deletion	1	C	-	11	50	22	0.272727	29.6364	Gene: g12151, mRNA: g12151	g12151:c.21-80delG
chr12	683999	SNV	1	T	G	11	50	22	0.363636	36.3636	CDS: g12114, Gene: g12114, mRNA: g12114	g12114:c.1757A>C	g12114:p.Gln586Pro
chr14	2692481	SNV	1	C	G	42	191	21.9895	0.261905	36.7857	Gene: g15090, mRNA: g15090	g15090:c.136+117G>C
chr14	2692482	SNV	1	G	A	42	191	21.9895	0.261905	36.7857	Gene: g15090, mRNA: g15090	g15090:c.136+116C>T
chr13	2939443	SNV	1	C	T	9	41	21.9512	0.3	37.8	CDS: g14332, Gene: g14332, mRNA: g14332	g14332:c.187C>T	g14332:p.Arg63Trp
chr15	1485199	SNV	1	G	A	9	41	21.9512	0.111111	35.4444
chr5	2917054	SNV	1	A	T	9	41	21.9512	0.444444	34.2222	Gene: Cre05.g238140, mRNA: Cre05.g238140, Three_prime_utr: PAC:26897690.three_prime_UTR.1
chr5	2076148	SNV	1	C	T	9	41	21.9512	0.454545	34.7273	Gene: Cre05.g234600, mRNA: Cre05.g234600	Cre05.g234600:c.3036+177G>A
scaffold_27	15622	SNV	1	T	G	9	41	21.9512	0.111111	34.5556	CDS: g18301, Gene: g18301, mRNA: g18301	g18301:c.22A>C	g18301:p.Ser8Arg
chr11	430135	SNV	1	T	C	16	73	21.9178	0.111111	37.2778
chr16	3951910	SNV	1	G	C	16	73	21.9178	0.1875	36.0625
scaffold_38	508	Deletion	1	C	-	39	178	21.9101	0.282051	26.7692
chr1	953680	SNV	1	C	A	7	32	21.875	0.428571	37.2857
chr12	685849	Insertion	1	-	G	7	32	21.875	0.285714	36.1429	Gene: g12114, mRNA: g12114	g12114:c.276+78_276+79insC
chr14	201445	SNV	1	T	C	7	32	21.875	0.285714	37.1429	Gene: g14683, mRNA: g14683	g14683:c.445-147A>G
chr16	1059368	SNV	1	A	G	7	32	21.875	0.3	37.5	Gene: g15715, mRNA: g15715	g15715:c.1615-1338T>C
chr16	864199	SNV	1	C	T	14	64	21.875	0.333333	34.0667	CDS: Cre16.g647950, Gene: Cre16.g647950, mRNA: Cre16.g647950	Cre16.g647950:c.480C>T
chr16	6098404	Insertion	8	-	GAGCAGGT	7	32	21.875	0.285714	36.9286
chr2	9005622	SNV	1	A	C	21	96	21.875	0.333333	36.0476
chr5	2395380	Deletion	1	C	-	7	32	21.875	0.285714	29.1429
chr7	4986480	SNV	1	G	T	7	32	21.875	0.375	37.375
chr8	2544689	Deletion	2	AC	-	7	32	21.875	0.428571	27.5714	Gene: Cre08.g372300, mRNA: Cre08.g372300	Cre08.g372300:c.2141-30_2141-29delAC
chr9	1044053	SNV	1	G	T	14	64	21.875	0.428571	36.6429	Gene: Cre09.g400750, mRNA: Cre09.g400750	Cre09.g400750:c.565-285G>T
chr9	5456515	SNV	1	T	C	7	32	21.875	0.285714	37
scaffold_27	15512	SNV	1	C	T	7	32	21.875	0.142857	35.1429	CDS: g18301, Gene: g18301, mRNA: g18301	g18301:c.132G>A
scaffold_44	1220	SNV	1	C	A	7	32	21.875	0.375	36.125
chr12	656658	Deletion	2	GT	-	12	55	21.8182	0.5	33.8333	Gene: g12111, mRNA: g12111	g12111:c.370+85_370+86delAC
chr2	126585	SNV	1	C	T	17	78	21.7949	0.470588	35.7647	Gene: Cre02.g074150, Gene: g1315, mRNA: Cre02.g074150, mRNA: g1315, Three_prime_utr: PAC:26900069.three_prime_UTR.1, Three_prime_utr: PAC:26900068.three_prime_UTR.1
chr16	4038519	SNV	1	G	A	27	124	21.7742	0.407407	35.2593	Gene: g16226, mRNA: g16226, Three_prime_utr: PAC:26891428.three_prime_UTR.1
chr1	6164426	Deletion	1	C	-	5	23	21.7391	0.4	33.2	Gene: Cre01.g044100, mRNA: Cre01.g044100, Three_prime_utr: PAC:26903898.three_prime_UTR.1
chr1	160730	Deletion	2	AC	-	5	23	21.7391	0	29	Gene: Cre01.g001200, mRNA: Cre01.g001200	Cre01.g001200:c.5778-135_5778-134delAC
chr10	3622560	SNV	1	T	C	5	23	21.7391	0.2	32.8
chr10	4050728	SNV	1	C	T	15	69	21.7391	0.333333	38.8667
chr10	4050739	SNV	1	G	A	15	69	21.7391	0.333333	39.4
chr11	505469	SNV	1	G	A	5	23	21.7391	0	37.2	Gene: g11527, mRNA: g11527	g11527:c.700-97C>T
chr11	420169	SNV	1	T	C	5	23	21.7391	0	34.6	CDS: g11514, Gene: g11514, mRNA: g11514	g11514:c.219T>C
chr11	2860254	SNV	1	C	G	5	23	21.7391	0	39.6	CDS: Cre11.g477700, Gene: Cre11.g477700, mRNA: Cre11.g477700	Cre11.g477700:c.669G>C	Cre11.g477700:p.Gln223His
chr12	6649927	SNV	1	A	G	5	23	21.7391	0.4	35.8	CDS: g13266, Gene: g13266, mRNA: g13266	g13266:c.1163T>C	g13266:p.Ile388Thr
chr12	306921	SNV	1	C	T	5	23	21.7391	0.2	37
chr15	1423065	SNV	1	A	C	5	23	21.7391	0.2	35.8
chr15	1813406	SNV	1	T	C	5	23	21.7391	0.4	35.6
chr16	3258631	SNV	1	G	C	5	23	21.7391	0.2	37.4
chr17	1966615	SNV	1	T	C	5	23	21.7391	0	37	Gene: Cre17.g710881, mRNA: Cre17.g710881, Three_prime_utr: PAC:26896683.three_prime_UTR.3
chr17	4970748	SNV	1	T	G	5	23	21.7391	0.2	36.8
chr2	8019212	SNV	1	A	G	25	115	21.7391	0.32	35.2
chr5	1637083	Deletion	2	TA	-	5	23	21.7391	0.2	28.4	Gene: g5283, mRNA: g5283	g5283:c.1825-128_1825-127delTA
chr5	1274441	SNV	1	G	A	10	46	21.7391	0.4	34.6
chr5	2416567	SNV	1	C	G	15	69	21.7391	0.444444	37.5556
chr6	7205328	Deletion	2	TG	-	5	23	21.7391	0.2	35.8	Gene: Cre06.g297850, mRNA: Cre06.g297850	Cre06.g297850:c.13806+68_13806+69delTG
chr6	4606172	SNV	1	G	T	5	23	21.7391	0	36	CDS: g6443, Gene: g6443, mRNA: g6443	g6443:c.3051G>T	g6443:p.Gln1017His
chr7	5115311	Deletion	2	TG	-	5	23	21.7391	0.4	27.2	Gene: Cre07.g347950, mRNA: Cre07.g347950	Cre07.g347950:c.6+101_6+102delTG
chr8	2951173	SNV	1	A	C	5	23	21.7391	0.4	36.4
chr9	2358527	SNV	1	T	C	5	23	21.7391	0.285714	36.1429	Gene: Cre09.g392000, Gene: g9452, mRNA: Cre09.g392000, mRNA: g9452	Cre09.g392000:c.[783+300T>C]; g9452:c.[783+300T>C]
chr9	318108	SNV	1	C	A	20	92	21.7391	0.363636	36.2727
chr9	326298	SNV	1	G	C	5	23	21.7391	0	35.2
scaffold_21	142328	Insertion	10	-	TCAGAGACAG	5	23	21.7391	0	36.76
scaffold_22	122114	SNV	1	C	A	5	23	21.7391	0.166667	38.1667
scaffold_25	68953	SNV	1	G	A	5	23	21.7391	0.2	35
scaffold_39	22196	SNV	1	C	A	101	465	21.7204	0.277228	36.9307
chr3	6950365	SNV	1	C	T	38	175	21.7143	0.275	33.3
chr9	319612	SNV	1	A	T	18	83	21.6867	0.111111	36.7222
chr12	978170	SNV	1	T	C	13	60	21.6667	0.230769	36.9231	Gene: g12152, mRNA: g12152, mRNA: g12152	g12152:c.[5117+123A>G];[7577+123A>G]
chr12	901619	SNV	1	T	C	13	60	21.6667	0.384615	33.9231	Gene: g12148, mRNA: g12148, Three_prime_utr: PAC:26907483.three_prime_UTR.1
chr9	1493851	SNV	1	C	T	13	60	21.6667	0	38.3077
chr12	982697	SNV	1	G	A	21	97	21.6495	0	36.381	Gene: g12152, mRNA: g12152, mRNA: g12152	g12152:c.[2843-60C>T];[5303-60C>T]
chr16	15671	SNV	1	G	A	24	111	21.6216	0.36	36.72	Gene: g15546, mRNA: g15546, Three_prime_utr: PAC:26892740.three_prime_UTR.1
chr2	7867869	SNV	1	T	C	40	185	21.6216	0.268293	34.7561	Gene: Cre02.g141700, mRNA: Cre02.g141700	Cre02.g141700:c.1730+1650T>C
chr3	6950805	SNV	1	C	G	8	37	21.6216	0.454545	34.9091
chr4	821957	SNV	1	G	C	8	37	21.6216	0.375	35.875
chr9	7177172	SNV	1	C	T	16	74	21.6216	0.125	37.9375	Gene: Cre09.g412150, mRNA: Cre09.g412150	Cre09.g412150:c.2482-155C>T
chr10	1383921	Deletion	1	C	-	19	88	21.5909	0.473684	34.2632	Gene: Cre10.g427900, Five_prime_utr: PAC:26904300.five_prime_UTR.1, mRNA: Cre10.g427900
chr5	2823939	SNV	1	G	C	19	88	21.5909	0.35	35.75	CDS: Cre05.g237500, Gene: Cre05.g237500, mRNA: Cre05.g237500	Cre05.g237500:c.468C>G	Cre05.g237500:p.Ile156Met
chr15	1427757	SNV	1	C	T	11	51	21.5686	0	34.7273	Gene: g15490, mRNA: g15490
chr2	8536607	SNV	1	C	T	11	51	21.5686	0.0909091	38.9091
chr3	4754	Deletion	1	C	-	11	51	21.5686	0.363636	29.9091
chr6	8745628	SNV	1	C	T	11	51	21.5686	0.363636	35.4545	CDS: g7170, CDS: Cre06.g309850, Gene: Cre06.g309850, Gene: g7170, mRNA: Cre06.g309850, mRNA: g7170	Cre06.g309850:c.[49G>A]; g7170:c.[133G>A]	Cre06.g309850:p.[Glu17Lys]; g7170:p.[Glu45Lys]
chr12	1686074	SNV	1	T	G	14	65	21.5385	0.428571	36.1429	Gene: Cre12.g485800, mRNA: Cre12.g485800	Cre12.g485800:c.1396+138A>C
chr2	7867799	SNV	1	G	A	45	209	21.5311	0.434783	36.1957	Gene: Cre02.g141700, mRNA: Cre02.g141700	Cre02.g141700:c.1730+1580G>A
chr7	3550091	SNV	1	A	G	17	79	21.519	0.277778	35.5556
chr15	1425434	SNV	1	C	G	26	121	21.4876	0.384615	36.2692
chr1	1578785	Deletion	2	TG	-	6	28	21.4286	0.166667	28.1667	Gene: Cre01.g008200, mRNA: Cre01.g008200	Cre01.g008200:c.1111-37_1111-36delCA
chr10	1384623	SNV	1	C	A	6	28	21.4286	0.5	36.6667
chr11	715600	SNV	1	T	C	6	28	21.4286	0.166667	37.1667	CDS: g11558, Gene: g11558, mRNA: g11558	g11558:c.30A>G
chr12	684005	SNV	1	T	C	9	42	21.4286	0.444444	36.4444	CDS: g12114, Gene: g12114, mRNA: g12114	g12114:c.1751A>G	g12114:p.Asn584Ser
chr13	4459199	SNV	1	G	C	6	28	21.4286	0.333333	37.8333	CDS: Cre13.g603450, Gene: Cre13.g603450, mRNA: Cre13.g603450	Cre13.g603450:c.58G>C	Cre13.g603450:p.Ala20Pro
chr13	4353071	SNV	1	A	G	9	42	21.4286	0.222222	33.5556
chr14	2114768	SNV	1	G	A	6	28	21.4286	0	36.9167
chr14	2114770	SNV	1	A	G	6	28	21.4286	0	36.9167
chr14	2168355	SNV	1	T	A	9	42	21.4286	0.333333	34
chr15	1461996	SNV	1	G	C	6	28	21.4286	0.333333	37.8333	Gene: g15492, mRNA: g15492	g15492:c.3837+1784G>C
chr15	1424623	SNV	1	T	G	30	140	21.4286	0.419355	36.1935
chr16	3944160	SNV	1	A	G	9	42	21.4286	0.333333	35.3333	Gene: g16214, mRNA: g16214	g16214:c.416+469A>G
chr16	5855011	Deletion	1	C	-	6	28	21.4286	0.5	34	Gene: Cre16.g677600, mRNA: Cre16.g677600, Three_prime_utr: PAC:26892309.three_prime_UTR.1
chr16	670309	SNV	1	T	G	9	42	21.4286	0.444444	37.4444
chr16	3258565	SNV	1	C	T	6	28	21.4286	0.333333	34.8333
chr16	5456402	SNV	1	A	C	6	28	21.4286	0.333333	36.8333
chr17	3136369	SNV	1	C	A	6	28	21.4286	0.166667	33.8333	Gene: Cre17.g721550, Gene: g17457, mRNA: Cre17.g721550, mRNA: g17457	Cre17.g721550:c.[118-157G>T]; g17457:c.[118-157G>T]
chr17	5011352	SNV	1	C	T	9	42	21.4286	0.222222	34.3333	CDS: g17775, Gene: g17775, mRNA: g17775	g17775:c.106C>T	g17775:p.Arg36Cys
chr17	973467	SNV	1	A	G	6	28	21.4286	0	39	CDS: g17045, Gene: g17045, mRNA: g17045	g17045:c.129A>G
chr17	6586756	SNV	1	T	C	6	28	21.4286	0.166667	37.3333
chr4	1051328	SNV	1	A	G	6	28	21.4286	0.333333	36.3333
chr4	3981426	SNV	1	T	C	15	70	21.4286	0.466667	37.2667
chr5	2942440	Deletion	1	G	-	6	28	21.4286	0.5	37.3333	Gene: g5485, mRNA: g5485	g5485:c.1566+709delC
chr6	7030288	SNV	1	T	G	6	28	21.4286	0.166667	33.5	Gene: Cre06.g296900, Five_prime_utr: PAC:26894171.five_prime_UTR.1, mRNA: Cre06.g296900
chr6	6852804	SNV	1	T	A	12	56	21.4286	0.461538	35.5385
chr7	1910765	SNV	1	A	G	6	28	21.4286	0	34.8333	Gene: g7559, mRNA: g7559	g7559:c.320-456A>G
chr7	3550145	SNV	1	T	G	21	98	21.4286	0.478261	35.5217
chr8	1713758	SNV	1	G	C	6	28	21.4286	0	33.5
chr8	2800918	SNV	1	C	T	6	28	21.4286	0.428571	38.1429
chr9	5456925	Deletion	1	C	-	9	42	21.4286	0	31.8889	Gene: g9954, Five_prime_utr: PAC:26895896.five_prime_UTR.1, mRNA: g9954
chr9	6941692	Insertion	1	-	G	21	98	21.4286	0.047619	37.619	Gene: g10169, mRNA: g10169, Three_prime_utr: PAC:26895066.three_prime_UTR.1
scaffold_23	30176	SNV	1	C	A	6	28	21.4286	0.333333	37.3333
chr4	793686	SNV	1	A	C	107	500	21.4	0.426087	36.4087
chr9	325174	SNV	1	T	G	22	103	21.3592	0.363636	34.7727
chr9	2355456	SNV	1	G	T	38	178	21.3483	0.358974	36.0256	Gene: Cre09.g392050, Gene: g9451, Five_prime_utr: PAC:26894993.five_prime_UTR.1, Five_prime_utr: PAC:26894994.five_prime_UTR.1, mRNA: Cre09.g392050, mRNA: g9451
chr17	4971834	SNV	1	A	G	13	61	21.3115	0.461538	36.3077
chr2	8064103	SNV	1	T	G	39	183	21.3115	0.230769	35.6154	Gene: g2687, Gene: g2688, mRNA: g2687, mRNA: g2687, mRNA: g2687, mRNA: g2688, mRNA: g2688, Three_prime_utr: PAC:26899741.three_prime_UTR.6, Three_prime_utr: PAC:26899742.three_prime_UTR.6
chr4	747689	SNV	1	A	G	13	61	21.3115	0.461538	35.2308	Gene: g4595, Five_prime_utr: PAC:26906097.five_prime_UTR.1, mRNA: g4595
chr4	588987	SNV	1	T	A	13	61	21.3115	0	35.8462	CDS: g4569, Gene: g4569, mRNA: g4569	g4569:c.1268A>T	g4569:p.Glu423Val
chr12	3143942	SNV	1	T	C	10	47	21.2766	0.363636	35.5455	Gene: g12587, mRNA: g12587	g12587:c.38+22A>G
chr15	1427753	SNV	1	G	C	10	47	21.2766	0.2	35.5	Gene: g15490, mRNA: g15490
chr15	1405236	SNV	1	G	A	10	47	21.2766	0.1	34.8
chr16	6735148	Insertion	3	-	CAT	10	47	21.2766	0.4	34.2333	Gene: g16705, mRNA: g16705	g16705:c.604-139_604-138insCAT
chr5	1273006	Deletion	7	ATACATC	-	10	47	21.2766	0.4	37.9
chr16	3276705	SNV	1	C	T	44	207	21.256	0.333333	35.6
chr15	1636177	SNV	1	C	T	24	113	21.2389	0.375	33.7917
chr13	1563264	Insertion	2	-	GT	7	33	21.2121	0.285714	34.5	Gene: Cre13.g573100, mRNA: Cre13.g573100	Cre13.g573100:c.390+32_390+33insGT
chr16	864194	SNV	1	G	C	14	66	21.2121	0.357143	34.2143	CDS: Cre16.g647950, Gene: Cre16.g647950, mRNA: Cre16.g647950	Cre16.g647950:c.475G>C	Cre16.g647950:p.Glu159Gln
chr17	1052007	SNV	1	A	T	21	99	21.2121	0.285714	36.5238
chr2	8196822	SNV	1	G	A	7	33	21.2121	0	35.8571	Gene: g2692, mRNA: g2692, Three_prime_utr: PAC:26899558.three_prime_UTR.1
chr4	976946	SNV	1	C	T	7	33	21.2121	0	34.2857
chr4	3831870	SNV	1	A	G	7	33	21.2121	0.142857	37.2857
chr5	3474900	SNV	1	C	T	7	33	21.2121	0	37.7143
scaffold_34	29709	SNV	1	C	A	7	33	21.2121	0.428571	32.8571
scaffold_44	4641	SNV	1	C	T	14	66	21.2121	0.357143	35.9643
scaffold_44	4643	SNV	1	A	T	14	66	21.2121	0.357143	35.9643
chr4	796004	SNV	1	T	C	171	807	21.1896	0.48	35.4057
chr12	915096	SNV	1	A	G	18	85	21.1765	0.210526	35.6316	CDS: g12149, Gene: g12149, mRNA: g12149	g12149:c.1677T>C
chr9	325548	SNV	1	A	C	18	85	21.1765	0.388889	36.5833
chr9	325550	SNV	1	C	T	18	85	21.1765	0.388889	36.5833
chr13	2938183	SNV	1	C	T	11	52	21.1538	0.454545	33.8182
chr4	212809	SNV	1	A	G	11	52	21.1538	0.272727	36
chr4	212811	SNV	1	G	C	11	52	21.1538	0.272727	36
chr4	212812	SNV	1	T	C	11	52	21.1538	0.272727	36
chr6	976829	SNV	1	G	C	55	260	21.1538	0.258621	36.7069	Gene: Cre06.g255700, Five_prime_utr: PAC:26893827.five_prime_UTR.1, mRNA: Cre06.g255700
chr6	978846	SNV	1	A	G	11	52	21.1538	0.363636	36.3636	CDS: Cre06.g255750, Gene: Cre06.g255750, mRNA: Cre06.g255750	Cre06.g255750:c.1416T>C
chr8	3913895	Deletion	1	C	-	11	52	21.1538	0.272727	32.3636
chr9	2355743	SNV	1	C	T	44	208	21.1538	0.363636	36.3977	Gene: Cre09.g392050, Gene: g9451, Five_prime_utr: PAC:26894993.five_prime_UTR.1, Five_prime_utr: PAC:26894994.five_prime_UTR.1, mRNA: Cre09.g392050, mRNA: g9451
chr9	2355745	SNV	1	C	T	44	208	21.1538	0.363636	36.3977	Gene: Cre09.g392050, Gene: g9451, Five_prime_utr: PAC:26894993.five_prime_UTR.1, Five_prime_utr: PAC:26894994.five_prime_UTR.1, mRNA: Cre09.g392050, mRNA: g9451
chr15	247275	SNV	1	T	A	15	71	21.1268	0.1875	36.125
chr15	1753037	SNV	1	T	G	15	71	21.1268	0.375	34.8125
chr9	324738	SNV	1	T	G	23	109	21.1009	0.217391	35.7826
chr1	5869935	SNV	1	T	C	8	38	21.0526	0.25	35.25
chr13	2939160	Insertion	1	-	C	8	38	21.0526	0	33.75	Gene: g14332, mRNA: g14332	g14332:c.112+52_112+53insC
chr15	247279	SNV	1	C	A	16	76	21.0526	0.125	35.625
chr15	1484477	SNV	1	C	T	8	38	21.0526	0.333333	36.7778
chr15	1752461	Deletion	1	C	-	16	76	21.0526	0.4375	33.8125
chr16	4039413	Deletion	1	G	-	8	38	21.0526	0.125	28.75
chr17	3136372	SNV	1	A	C	4	19	21.0526	0.25	33.875	Gene: Cre17.g721550, Gene: g17457, mRNA: Cre17.g721550, mRNA: g17457	Cre17.g721550:c.[118-160T>G]; g17457:c.[118-160T>G]
chr17	3136373	SNV	1	G	A	4	19	21.0526	0.25	33.875	Gene: Cre17.g721550, Gene: g17457, mRNA: Cre17.g721550, mRNA: g17457	Cre17.g721550:c.[118-161C>T]; g17457:c.[118-161C>T]
chr17	2898839	SNV	1	C	A	20	95	21.0526	0.3	33.8	Gene: Cre17.g719700, mRNA: Cre17.g719700, Three_prime_utr: PAC:26896956.three_prime_UTR.1
chr17	984922	SNV	1	T	C	8	38	21.0526	0.375	37.75
chr2	2704	SNV	1	T	C	12	57	21.0526	0.0833333	34.3333
chr3	6932481	SNV	1	G	A	12	57	21.0526	0.5	36.75	Gene: g4121, mRNA: g4121, Three_prime_utr: PAC:26902515.three_prime_UTR.1
chr4	2335361	SNV	1	C	G	12	57	21.0526	0	36.9167	Gene: Cre04.g220751, mRNA: Cre04.g220751, Three_prime_utr: PAC:26905963.three_prime_UTR.1
chr6	4701123	SNV	1	C	A	8	38	21.0526	0.125	35.375
chr6	6688830	SNV	1	C	G	8	38	21.0526	0.5	35.5
chr7	949780	Deletion	2	TG	-	8	38	21.0526	0.125	34.75	Gene: Cre07.g319200, mRNA: Cre07.g319200	Cre07.g319200:c.2341-317_2341-316delTG
chr4	738422	SNV	1	A	T	99	471	21.0191	0.39	36.33
chr10	3211647	SNV	1	A	C	13	62	20.9677	0.461538	36.3077
chr2	7867805	SNV	1	G	C	39	186	20.9677	0.414634	36.3415	Gene: Cre02.g141700, mRNA: Cre02.g141700	Cre02.g141700:c.1730+1586G>C
chr5	2917122	Insertion	1	-	T	13	62	20.9677	0.384615	37.0769	Gene: Cre05.g238140, mRNA: Cre05.g238140, Three_prime_utr: PAC:26897690.three_prime_UTR.1
scaffold_19	168618	SNV	1	C	G	13	62	20.9677	0.384615	34.1538	Gene: g18140, Five_prime_utr: PAC:26892925.five_prime_UTR.1, mRNA: g18140
chr8	3068031	SNV	1	T	G	35	167	20.9581	0.432432	36.4054
chr10	4784866	SNV	1	C	A	9	43	20.9302	0.333333	36.8889	Gene: g11142, mRNA: g11142	g11142:c.1233+32C>A
chr2	8979542	SNV	1	C	T	9	43	20.9302	0.1	36.4	CDS: g2806, Gene: g2806, mRNA: g2806	g2806:c.1488G>A
chr5	2823789	Insertion	3	-	CTG	18	86	20.9302	0.333333	37.8889	CDS: Cre05.g237500, Gene: Cre05.g237500, mRNA: Cre05.g237500	Cre05.g237500:c.618_619insCAG	Cre05.g237500:p.Leu206_Gln207insGln
chr6	4755638	SNV	1	G	T	9	43	20.9302	0.333333	37.3333
chr8	4791833	SNV	1	A	G	9	43	20.9302	0.333333	37.2222	Gene: g9045, mRNA: g9045, mRNA: g9045	g9045:c.[872+601A>G];[872+601A>G]
scaffold_23	113575	SNV	1	T	C	9	43	20.9302	0	33.1111
chr14	522276	SNV	1	A	G	32	153	20.915	0.28125	36.6562	Gene: Cre14.g611450, mRNA: Cre14.g611450, Three_prime_utr: PAC:26890822.three_prime_UTR.1
chr1	588483	SNV	1	G	C	5	24	20.8333	0	36.8	Gene: g80, mRNA: g80	g80:c.1496+78G>C
chr11	715618	SNV	1	A	G	5	24	20.8333	0	38.8	CDS: g11558, Gene: g11558, mRNA: g11558	g11558:c.12T>C
chr12	683937	SNV	1	C	G	5	24	20.8333	0.2	37.2	CDS: g12114, Gene: g12114, mRNA: g12114	g12114:c.1819G>C	g12114:p.Glu607Gln
chr12	667023	SNV	1	G	T	5	24	20.8333	0.2	35.4	CDS: g12112, Gene: g12112, mRNA: g12112	g12112:c.237C>A
chr12	6571644	SNV	1	C	G	10	48	20.8333	0.5	34.5
chr13	4081533	Deletion	1	T	-	5	24	20.8333	0.2	22	Gene: Cre13.g591350, mRNA: Cre13.g591350	Cre13.g591350:c.654-187delA
chr13	3230571	SNV	1	C	T	5	24	20.8333	0	38.4	Gene: Cre13.g585750, mRNA: Cre13.g585750	Cre13.g585750:c.390+241C>T
chr15	1409619	SNV	1	A	T	10	48	20.8333	0.2	36.2
chr15	1485155	SNV	1	A	G	5	24	20.8333	0	37
chr17	4961974	Deletion	1	G	-	5	24	20.8333	0.4	27.2	Gene: g17770, mRNA: g17770	g17770:c.657+303delG
chr17	1966611	SNV	1	G	C	5	24	20.8333	0.2	38.2	Gene: Cre17.g710881, mRNA: Cre17.g710881, Three_prime_utr: PAC:26896683.three_prime_UTR.3
chr17	3576691	SNV	1	G	A	5	24	20.8333	0	34.2	CDS: Cre17.g725600, Gene: Cre17.g725600, mRNA: Cre17.g725600	Cre17.g725600:c.555C>T
chr17	6132300	SNV	1	C	A	10	48	20.8333	0.5	34.4
chr2	9073388	SNV	1	A	T	10	48	20.8333	0.4	34.3	Gene: g2824, mRNA: g2824, Three_prime_utr: PAC:26900537.three_prime_UTR.1
chr2	7868745	SNV	1	T	A	15	72	20.8333	0.333333	33.4667	Gene: Cre02.g141700, mRNA: Cre02.g141700	Cre02.g141700:c.1731-1611T>A
chr2	2342924	SNV	1	C	T	5	24	20.8333	0.166667	32.8333	CDS: Cre02.g090850, Gene: Cre02.g090850, mRNA: Cre02.g090850	Cre02.g090850:c.909C>T
chr2	9067095	SNV	1	G	T	45	216	20.8333	0.489362	35.6809
chr4	588963	SNV	1	C	A	10	48	20.8333	0.1	37.8	Gene: g4569, mRNA: g4569	g4569:c.1284+8G>T
chr5	2941823	Deletion	1	G	-	5	24	20.8333	0	35.2	Gene: g5485, mRNA: g5485	g5485:c.1567-550delC
chr5	1987350	SNV	1	G	C	20	96	20.8333	0.4	34.7	Gene: g5338, mRNA: g5338, Three_prime_utr: PAC:26897971.three_prime_UTR.1
chr5	2076266	SNV	1	C	T	5	24	20.8333	0.4	36.6	Gene: Cre05.g234600, mRNA: Cre05.g234600	Cre05.g234600:c.3036+59G>A
chr5	2823928	SNV	1	G	A	20	96	20.8333	0.380952	36.7143	CDS: Cre05.g237500, Gene: Cre05.g237500, mRNA: Cre05.g237500	Cre05.g237500:c.479C>T	Cre05.g237500:p.Ser160Leu
chr6	3507490	SNV	1	T	A	5	24	20.8333	0.4	33.8	Gene: g6249, mRNA: g6249, Three_prime_utr: PAC:26892979.three_prime_UTR.1
chr6	5513135	SNV	1	C	T	5	24	20.8333	0	35.6	Gene: Cre06.g284850, Gene: g6623, mRNA: Cre06.g284850, mRNA: g6623	Cre06.g284850:c.[1335+72G>A]; g6623:c.[1335+72G>A]
chr8	2197499	Insertion	3	-	CTG	5	24	20.8333	0.2	33.8667	Gene: g8661, mRNA: g8661	g8661:c.79-108_79-107insCAG
chr8	4651215	SNV	1	T	C	5	24	20.8333	0.4	36.6	Gene: Cre08.g383550, mRNA: Cre08.g383550	Cre08.g383550:c.1475-281T>C
chr8	3161864	SNV	1	C	T	10	48	20.8333	0.3	37.5
chr8	3913897	SNV	1	T	C	10	48	20.8333	0.2	37.6
chr9	6844053	SNV	1	C	T	5	24	20.8333	0.2	32	Gene: Cre09.g409800, mRNA: Cre09.g409800	Cre09.g409800:c.942+35G>A
chr9	6844054	SNV	1	C	T	5	24	20.8333	0.2	32	Gene: Cre09.g409800, mRNA: Cre09.g409800	Cre09.g409800:c.942+34G>A
chr9	7436037	SNV	1	A	G	5	24	20.8333	0.5	37.5	CDS: g10241, Gene: g10241, mRNA: g10241	g10241:c.1394A>G	g10241:p.Gln465Arg
chr9	317161	SNV	1	T	C	15	72	20.8333	0.375	35.9375
chr9	5368118	SNV	1	A	G	5	24	20.8333	0.4	33.6
scaffold_22	123823	Deletion	2	TA	-	5	24	20.8333	0.4	31.4
scaffold_30	10521	SNV	1	G	A	5	24	20.8333	0.4	36.8
chr15	1636831	SNV	1	C	G	31	149	20.8054	0.46875	35.9375
chr12	679289	SNV	1	C	G	21	101	20.7921	0.318182	33.5	Gene: g12114, mRNA: g12114, Three_prime_utr: PAC:26907869.three_prime_UTR.2
chr15	1751482	SNV	1	G	T	11	53	20.7547	0.363636	35.5455
chr3	6280004	SNV	1	A	C	11	53	20.7547	0.454545	36.2727	Gene: Cre03.g192900, mRNA: Cre03.g192900, Three_prime_utr: PAC:26901587.three_prime_UTR.1
scaffold_22	122942	SNV	1	A	G	22	106	20.7547	0.130435	37.1739
chr2	7866812	SNV	1	G	A	67	323	20.743	0.478261	36.1594	Gene: Cre02.g141700, mRNA: Cre02.g141700	Cre02.g141700:c.1730+593G>A
chr10	1383923	SNV	1	T	C	17	82	20.7317	0.411765	36.4118	Gene: Cre10.g427900, Five_prime_utr: PAC:26904300.five_prime_UTR.1, mRNA: Cre10.g427900
chr15	1816559	SNV	1	G	T	17	82	20.7317	0	38.4706
chr7	3550086	SNV	1	G	A	17	82	20.7317	0.277778	35.6667
chr6	1700	SNV	1	A	G	23	111	20.7207	0.304348	36.6087
chr1	1309959	SNV	1	G	A	6	29	20.6897	0.333333	36.5
chr1	1349725	SNV	1	A	G	6	29	20.6897	0.5	36.3333
chr12	1001797	SNV	1	A	G	6	29	20.6897	0.166667	37.5	CDS: g12153, Gene: g12153, mRNA: g12153	g12153:c.2703T>C
chr13	4231901	SNV	1	G	T	12	58	20.6897	0.357143	37.5714
chr14	2356789	SNV	1	G	T	6	29	20.6897	0.428571	35.2857	Gene: g15035, Gene: Cre14.g623900, mRNA: g15035, mRNA: Cre14.g623900, Three_prime_utr: PAC:26891227.three_prime_UTR.1, Three_prime_utr: PAC:26891226.three_prime_UTR.1
chr14	202347	SNV	1	C	T	6	29	20.6897	0.166667	35	Gene: g14683, mRNA: g14683	g14683:c.387-138G>A
chr15	1412569	SNV	1	A	G	6	29	20.6897	0.5	34.3333
chr16	3264051	SNV	1	T	G	6	29	20.6897	0.166667	37.9167
chr17	1131155	SNV	1	T	C	6	29	20.6897	0	34.5	Gene: Cre17.g704250, mRNA: Cre17.g704250	Cre17.g704250:c.311-48T>C
chr4	824820	SNV	1	T	C	6	29	20.6897	0	33.8333	Gene: g4610, mRNA: g4610, Three_prime_utr: PAC:26905551.three_prime_UTR.1
chr6	2215658	SNV	1	C	G	6	29	20.6897	0.333333	37.3333	CDS: g5975, Gene: Cre06.g266200, Gene: g5975, mRNA: Cre06.g266200, mRNA: g5975	g5975:c.[159G>C]; Cre06.g266200:c.[64-380G>C]	g5975:p.Arg53Ser
chr6	490415	SNV	1	G	T	6	29	20.6897	0.333333	34.3333
chr7	6377391	SNV	1	C	T	6	29	20.6897	0.333333	35.8333	CDS: g8315, Gene: g8315, mRNA: g8315	g8315:c.221G>A	g8315:p.Arg74Gln
chr9	1648793	Deletion	1	G	-	6	29	20.6897	0.333333	31.1667	Gene: g9342, mRNA: g9342	g9342:c.122-32delC
chr9	319287	SNV	1	A	G	12	58	20.6897	0.5	35.5714
chr9	328780	SNV	1	C	T	12	58	20.6897	0.416667	35.8333
chr9	1550274	SNV	1	T	G	18	87	20.6897	0.111111	36.7222
chr10	3211663	SNV	1	C	G	13	63	20.6349	0.461538	35.3846
chr9	324453	SNV	1	T	G	13	63	20.6349	0.230769	37.6923
scaffold_38	50	SNV	1	C	G	33	160	20.625	0.333333	35.6667
chr17	4287364	SNV	1	C	T	20	97	20.6186	0.45	34.35
chr2	8740565	SNV	1	C	T	20	97	20.6186	0.2	37.75
chr11	1877439	SNV	1	C	T	7	34	20.5882	0.125	34.25	Gene: g11743, mRNA: g11743, mRNA: g11743, Three_prime_utr: PAC:26890452.three_prime_UTR.2, Three_prime_utr: PAC:26890451.three_prime_UTR.1
chr12	1685997	SNV	1	T	A	14	68	20.5882	0.428571	35.3929	Gene: Cre12.g485800, mRNA: Cre12.g485800	Cre12.g485800:c.1397-143A>T
chr12	1685998	SNV	1	G	A	14	68	20.5882	0.428571	35.3929	Gene: Cre12.g485800, mRNA: Cre12.g485800	Cre12.g485800:c.1397-144C>T
chr14	2399367	Insertion	8	-	TGACGCCG	7	34	20.5882	0	36.4107	Gene: Cre14.g624450, Five_prime_utr: PAC:26891136.five_prime_UTR.1, mRNA: Cre14.g624450
chr15	491088	SNV	1	A	T	7	34	20.5882	0.428571	34.4286	Gene: g15357, mRNA: g15357	g15357:c.1615-270T>A
chr4	737904	SNV	1	G	A	7	34	20.5882	0.428571	36.4286
chr4	3980794	SNV	1	C	A	7	34	20.5882	0.428571	36.4286
chr6	8815181	SNV	1	T	C	7	34	20.5882	0.428571	35.1429	CDS: Cre06.g310250, Gene: Cre06.g310250, mRNA: Cre06.g310250	Cre06.g310250:c.235A>G	Cre06.g310250:p.Ile79Val
chr7	3736484	SNV	1	C	G	7	34	20.5882	0.428571	34.5714
chr9	318330	SNV	1	C	A	14	68	20.5882	0.266667	35.7333
scaffold_22	122130	Deletion	1	A	-	7	34	20.5882	0.285714	36.1429
chr2	9067084	SNV	1	G	A	37	180	20.5556	0.368421	34.9211
chr15	490929	SNV	1	C	T	15	73	20.5479	0.4	34.4	Gene: g15357, mRNA: g15357	g15357:c.1615-111G>A
chr9	2355896	Insertion	1	-	G	60	292	20.5479	0.383333	36.3
chr9	7234184	SNV	1	A	G	15	73	20.5479	0.266667	35.8
chr7	3550399	SNV	1	T	A	23	112	20.5357	0.173913	38
chr8	3066881	SNV	1	C	G	39	190	20.5263	0.225	35.925
chr13	4458997	SNV	1	G	A	8	39	20.5128	0	38	Gene: Cre13.g603450, Five_prime_utr: PAC:26898659.five_prime_UTR.1, mRNA: Cre13.g603450
chr15	489158	SNV	1	G	T	8	39	20.5128	0.125	37.25	Gene: Cre15.g636650, mRNA: Cre15.g636650, Three_prime_utr: PAC:26898241.three_prime_UTR.1
chr15	1424875	SNV	1	C	T	8	39	20.5128	0.5	35
chr2	8316538	SNV	1	A	G	8	39	20.5128	0.375	35.1875
chr2	8316539	SNV	1	T	G	8	39	20.5128	0.375	35.1875
chr4	475753	SNV	1	G	C	8	39	20.5128	0	33.75
chr4	822737	SNV	1	C	A	8	39	20.5128	0.125	35.625
chr8	3522474	SNV	1	A	G	8	39	20.5128	0.25	35.125	Gene: Cre08.g375200, Gene: g8840, mRNA: Cre08.g375200, mRNA: g8840	Cre08.g375200:c.[904-634A>G]; g8840:c.[904-634A>G]
chr9	324935	SNV	1	C	A	8	39	20.5128	0	37
chr9	326564	SNV	1	A	C	8	39	20.5128	0.25	34.875
scaffold_25	27676	SNV	1	C	T	8	39	20.5128	0.375	37.375
scaffold_34	29753	SNV	1	T	C	8	39	20.5128	0.375	35.75
chr1	2158524	Deletion	2	TG	-	9	44	20.4545	0.333333	32	Gene: Cre01.g011800, mRNA: Cre01.g011800	Cre01.g011800:c.1635+51_1635+52delCA
chr15	1461286	Insertion	1	-	T	9	44	20.4545	0.444444	37	Gene: g15492, mRNA: g15492	g15492:c.3837+1073_3837+1074insT
chr15	1909915	SNV	1	G	A	9	44	20.4545	0.333333	33.4444
chr2	8048640	SNV	1	G	T	9	44	20.4545	0.222222	37.2222	Gene: g2687, mRNA: g2687, mRNA: g2687, mRNA: g2687, mRNA: g2687	g2687:c.[1684-372C>A];[1786-372C>A];[1453-889C>A];[1296-372C>A]
chr7	3549502	Deletion	3	CGG	-	9	44	20.4545	0.333333	31.1111
chr8	3050402	SNV	1	C	A	9	44	20.4545	0.333333	34.8889	Gene: g8779, mRNA: g8779	g8779:c.1602-204C>A
scaffold_21	76642	SNV	1	T	C	9	44	20.4545	0	34.7778
scaffold_22	122649	SNV	1	C	A	18	88	20.4545	0.111111	37.7222
chr11	2378821	SNV	1	G	A	94	460	20.4348	0.244681	33.5638
chr2	7868233	SNV	1	A	G	19	93	20.4301	0.421053	34.5789	Gene: Cre02.g141700, mRNA: Cre02.g141700	Cre02.g141700:c.1730+2014A>G
chr7	3103839	Deletion	1	T	-	19	93	20.4301	0.315789	35.8421
chr11	447608	SNV	1	G	A	49	240	20.4167	0.42	36.78	Gene: g11519, mRNA: g11519, Three_prime_utr: PAC:26890626.three_prime_UTR.1
chr14	2692505	Insertion	1	-	C	89	436	20.4128	0.348315	35.6517	Gene: g15090, mRNA: g15090	g15090:c.136+93_136+94insG
chr14	2119389	SNV	1	C	T	10	49	20.4082	0.166667	37.8333
chr2	7867842	SNV	1	G	A	40	196	20.4082	0.15	35.575	Gene: Cre02.g141700, mRNA: Cre02.g141700	Cre02.g141700:c.1730+1623G>A
chr9	322950	Deletion	2	GC	-	10	49	20.4082	0	35.2
scaffold_22	10613	SNV	1	C	T	10	49	20.4082	0.3	35.3
chr4	807882	SNV	1	G	C	21	103	20.3883	0.434783	35.3043	Gene: g4605, mRNA: g4605, mRNA: g4605	g4605:c.[883-58C>G];[1186-58C>G]
chr5	1267327	SNV	1	T	A	21	103	20.3883	0.333333	35.5238	Gene: g5228, Five_prime_utr: PAC:26897727.five_prime_UTR.1, Five_prime_utr: PAC:26897728.five_prime_UTR.1, mRNA: g5228, mRNA: g5228
chr12	6570222	Insertion	3	-	AAG	11	54	20.3704	0.363636	36.1515
chr15	1425726	SNV	1	T	G	11	54	20.3704	0.0909091	37.6364
chr2	1602184	Deletion	2	GT	-	11	54	20.3704	0.0909091	32.5455	Gene: Cre02.g085100, mRNA: Cre02.g085100	Cre02.g085100:c.1873-69_1873-68delAC
chr4	737882	SNV	1	C	T	11	54	20.3704	0.333333	34.75
chr3	8399702	SNV	1	T	C	1231	6047	20.3572	0.486122	35.8072
chr9	2355757	SNV	1	T	C	46	226	20.354	0.26087	37.4565
chr2	8064391	Deletion	1	C	-	25	123	20.3252	0.24	27.12	Gene: g2687, Gene: g2688, mRNA: g2687, mRNA: g2687, mRNA: g2687, mRNA: g2688, mRNA: g2688
chr12	9189866	SNV	1	A	T	13	64	20.3125	0	37.6154	CDS: g13733, CDS: Cre12.g541950, Gene: Cre12.g541950, Gene: g13733, mRNA: Cre12.g541950, mRNA: g13733	Cre12.g541950:c.[747T>A]; g13733:c.[747T>A]
chr6	979742	SNV	1	G	C	13	64	20.3125	0	35.7692	CDS: Cre06.g255750, Gene: Cre06.g255750, mRNA: Cre06.g255750	Cre06.g255750:c.749C>G	Cre06.g255750:p.Ala250Gly
chr10	5784774	SNV	1	G	C	14	69	20.2899	0.214286	36.8571	Gene: g11310, mRNA: g11310, Three_prime_utr: PAC:26904797.three_prime_UTR.1
chr12	9002484	SNV	1	A	T	14	69	20.2899	0.5	37.1429
chr12	9002489	SNV	1	T	C	14	69	20.2899	0.5	36.5714
chr15	1404045	SNV	1	C	T	14	69	20.2899	0.357143	35.1429	Gene: g15489, Five_prime_utr: PAC:26898243.five_prime_UTR.1, mRNA: g15489
chr9	323863	SNV	1	G	A	14	69	20.2899	0.4	37.4667
chr2	469726	SNV	1	G	T	15	74	20.2703	0.4	35.5333	Gene: Cre02.g076600, mRNA: Cre02.g076600	Cre02.g076600:c.750+46G>T
chr12	993506	SNV	1	G	T	16	79	20.2532	0.25	34.6875	Gene: g12152, mRNA: g12152	g12152:c.71-1094C>A
chr12	1007224	SNV	1	T	C	17	84	20.2381	0.470588	35.8235	Gene: g12153, mRNA: g12153	g12153:c.60+31A>G
chr12	9024356	SNV	1	A	T	17	84	20.2381	0	37.0588
chr8	3782275	SNV	1	G	C	17	84	20.2381	0.473684	36.4211
chr9	319759	SNV	1	T	C	17	84	20.2381	0.444444	37.6111
scaffold_38	23103	SNV	1	A	T	18	89	20.2247	0.166667	37.5556
chr6	2225550	Insertion	8	-	TGCAAGCC	20	99	20.202	0.4	37.3438	Gene: Cre06.g266300, mRNA: Cre06.g266300, Three_prime_utr: PAC:26893786.three_prime_UTR.2
chr9	2354824	SNV	1	G	A	25	124	20.1613	0.16	37.62	Gene: Cre09.g392050, Gene: g9451, mRNA: Cre09.g392050, mRNA: g9451	g9451:c.[210+41C>T]; Cre09.g392050:c.[210+41C>T]
chr9	2354825	SNV	1	G	A	25	124	20.1613	0.16	37.62	Gene: Cre09.g392050, Gene: g9451, mRNA: Cre09.g392050, mRNA: g9451	g9451:c.[210+40C>T]; Cre09.g392050:c.[210+40C>T]
chr15	1636834	SNV	1	A	C	29	144	20.1389	0.483871	36.0645
chr17	2148013	SNV	1	C	T	29	144	20.1389	0.433333	36.4333
chr2	8067635	Deletion	1	G	-	73	364	20.0549	0.342466	32.8767	Gene: g2687, Gene: g2688, mRNA: g2687, mRNA: g2687, mRNA: g2687, mRNA: g2688, mRNA: g2688, Three_prime_utr: PAC:26899741.three_prime_UTR.3, Three_prime_utr: PAC:26899742.three_prime_UTR.3
chr1	4916083	SNV	1	A	C	4	20	20	0	37.25	Gene: g769, mRNA: g769, mRNA: g769	g769:c.[1404+264A>C];[1404+264A>C]
chr1	1125847	SNV	1	C	G	7	35	20	0	38.2857	Gene: g161, Five_prime_utr: PAC:26903902.five_prime_UTR.1, mRNA: g161
chr1	2073184	SNV	1	C	T	5	25	20	0.2	34.2	Gene: Cre01.g011100, Gene: g278, mRNA: Cre01.g011100, mRNA: g278	Cre01.g011100:c.[539+157G>A]; g278:c.[539+157G>A]
chr1	310205	Deletion	1	C	-	5	25	20	0.4	27.6	Gene: Cre01.g001750, mRNA: Cre01.g001750	Cre01.g001750:c.805-318delG
chr1	12314	SNV	1	C	T	8	40	20	0.111111	34.8889
chr1	953676	SNV	1	A	C	5	25	20	0.2	38
chr1	1349698	SNV	1	G	A	6	30	20	0.5	35.6667
chr10	5869684	SNV	1	A	G	8	40	20	0.25	36.625	Gene: Cre10.g461850, mRNA: Cre10.g461850	Cre10.g461850:c.1487+763A>G
chr10	1383920	SNV	1	T	G	16	80	20	0.4375	37	Gene: Cre10.g427900, Five_prime_utr: PAC:26904300.five_prime_UTR.1, mRNA: Cre10.g427900
chr10	2244199	SNV	1	A	T	11	55	20	0.272727	34.7273
chr10	3623160	SNV	1	G	A	4	20	20	0.25	37.75
chr10	4954529	SNV	1	A	G	6	30	20	0.166667	37.5
chr11	715406	SNV	1	C	A	6	30	20	0	34.3333	Gene: g11558, mRNA: g11558	g11558:c.194+30G>T
chr11	2523707	SNV	1	T	G	5	25	20	0.2	34.8	Gene: Cre11.g475950, Gene: g11822, mRNA: Cre11.g475950, mRNA: g11822	Cre11.g475950:c.[7306+466T>G]; g11822:c.[7306+466T>G]
chr11	2524139	SNV	1	A	T	5	25	20	0	35.8	Gene: Cre11.g475950, Gene: g11822, mRNA: Cre11.g475950, mRNA: g11822	Cre11.g475950:c.[7306+898A>T]; g11822:c.[7306+898A>T]
chr11	92396	SNV	1	G	A	7	35	20	0.428571	37.2857
chr11	1877576	SNV	1	A	G	9	45	20	0	34.6667
chr11	2366423	SNV	1	C	T	4	20	20	0	38
chr12	999557	SNV	1	T	G	9	45	20	0.111111	35.2222	Gene: g12153, mRNA: g12153	g12153:c.4168-6A>C
chr12	1007127	SNV	1	T	C	16	80	20	0.5	36.625	Gene: g12153, mRNA: g12153	g12153:c.61-21A>G
chr12	974909	SNV	1	T	G	8	40	20	0.444444	36.1111	Gene: g12151, mRNA: g12151	g12151:c.21-88A>C
chr12	907840	Deletion	1	A	-	6	30	20	0.5	34	Gene: g12149, mRNA: g12149	g12149:c.3698-131delT
chr12	836716	SNV	1	A	G	6	30	20	0.5	36.6667	Gene: g12143, mRNA: g12143	g12143:c.274-73T>C
chr12	2451875	Insertion	2	-	CA	5	25	20	0.2	36.4	Gene: Cre12.g506900, mRNA: Cre12.g506900	Cre12.g506900:c.2658+61_2658+62insTG
chr12	2562384	SNV	1	T	A	4	20	20	0.25	35	Gene: Cre12.g505400, mRNA: Cre12.g505400, Three_prime_utr: PAC:26906316.three_prime_UTR.1
chr12	983022	Deletion	3	AAC	-	13	65	20	0.0769231	36.4615	CDS: g12152, CDS: g12152, Gene: g12152, mRNA: g12152, mRNA: g12152	g12152:c.[2812_2814delGTT];[5272_5274delGTT]	g12152:p.[Val938del];[Val1758del]
chr12	209536	SNV	1	G	A	4	20	20	0.5	31.5	CDS: g12033, CDS: g12033, Gene: g12033, mRNA: g12033, mRNA: g12033	g12033:c.[128G>A];[128G>A]	g12033:p.[Cys43Tyr];[Cys43Tyr]
chr12	6570149	SNV	1	C	T	5	25	20	0.4	35.2
chr12	6784985	SNV	1	T	A	6	30	20	0.428571	35.5714
chr12	9002008	SNV	1	C	T	14	70	20	0.266667	32.5333
chr13	425068	SNV	1	G	A	5	25	20	0	36.8
chr14	3466977	Deletion	2	AC	-	4	20	20	0.25	30
chr15	1461431	SNV	1	T	A	4	20	20	0.25	33.5	Gene: g15492, mRNA: g15492	g15492:c.3837+1219T>A
chr15	1466858	SNV	1	C	T	5	25	20	0.2	34.8	Gene: g15492, mRNA: g15492	g15492:c.3838-1293C>T
chr15	1453867	SNV	1	T	C	4	20	20	0	36.25	Gene: g15491, mRNA: g15491	g15491:c.281+436A>G
chr15	1235275	SNV	1	C	T	9	45	20	0.444444	33.7778	Gene: Cre15.g641500, mRNA: Cre15.g641500, Three_prime_utr: PAC:26898125.three_prime_UTR.1
chr15	632468	SNV	1	C	G	4	20	20	0.25	34.75	CDS: g15376, CDS: g15376, Gene: g15376, mRNA: g15376, mRNA: g15376	g15376:c.[696C>G];[696C>G]
chr15	1405267	SNV	1	C	T	9	45	20	0.111111	35.8889
chr15	1424867	Deletion	1	A	-	6	30	20	0.5	37.8333
chr15	1425734	SNV	1	G	C	10	50	20	0.1	37.5
chr15	1483870	SNV	1	A	C	4	20	20	0.25	35.25
chr15	1486763	Deletion	2	CA	-	6	30	20	0	35.6667
chr15	1823595	SNV	1	C	T	7	35	20	0	37.5714
chr16	1368899	Deletion	2	TG	-	4	20	20	0	31.25	Gene: Cre16.g651923, mRNA: Cre16.g651923	Cre16.g651923:c.1551+26_1551+27delTG
chr16	2689640	Deletion	1	A	-	4	20	20	0.25	30	CDS: Cre16.g662250, Gene: Cre16.g662250, mRNA: Cre16.g662250	Cre16.g662250:c.716delT	Cre16.g662250:p.Leu239fs
chr16	162639	SNV	1	T	G	17	85	20	0.411765	36.2941
chr16	665617	SNV	1	G	T	4	20	20	0.5	33.75
chr17	5296483	Deletion	1	C	-	4	20	20	0	29.25	Gene: g17808, mRNA: g17808	g17808:c.429+245delC
chr17	5123708	SNV	1	C	G	9	45	20	0.444444	34.3889	Gene: g17785, mRNA: g17785	g17785:c.2385-1471G>C
chr17	5123709	SNV	1	A	G	9	45	20	0.444444	34.3889	Gene: g17785, mRNA: g17785	g17785:c.2385-1472T>C
chr17	4849205	SNV	1	A	C	12	60	20	0.333333	35.6667	Gene: g17748, Gene: g17749, mRNA: g17748, mRNA: g17749, Three_prime_utr: PAC:26896380.three_prime_UTR.1, Three_prime_utr: PAC:26896832.three_prime_UTR.1
chr17	3136322	SNV	1	G	A	8	40	20	0.125	36.75	Gene: Cre17.g721550, Gene: g17457, mRNA: Cre17.g721550, mRNA: g17457	Cre17.g721550:c.[118-110C>T]; g17457:c.[118-110C>T]
chr17	965149	SNV	1	A	G	6	30	20	0	36.6667
chr17	969849	SNV	1	C	T	5	25	20	0.4	38.4
chr17	981389	SNV	1	G	A	6	30	20	0.166667	37
chr17	981391	SNV	1	C	T	6	30	20	0.166667	37
chr17	6366865	SNV	1	C	T	4	20	20	0	37.5
chr2	8268262	SNV	1	C	T	6	30	20	0.166667	36.6667	Gene: g2703, mRNA: g2703	g2703:c.84+213C>T
chr2	8197411	SNV	1	A	G	7	35	20	0.285714	37.4286	Gene: g2692, mRNA: g2692	g2692:c.1639+36T>C
chr2	7866586	SNV	1	G	A	22	110	20	0.136364	36.5455	Gene: Cre02.g141700, mRNA: Cre02.g141700	Cre02.g141700:c.1730+367G>A
chr2	7867465	SNV	1	G	A	16	80	20	0.25	36.8125	Gene: Cre02.g141700, mRNA: Cre02.g141700	Cre02.g141700:c.1730+1246G>A
chr2	7868175	SNV	1	A	G	9	45	20	0.444444	35.7778	Gene: Cre02.g141700, mRNA: Cre02.g141700	Cre02.g141700:c.1730+1956A>G
chr2	6610619	Deletion	2	CA	-	6	30	20	0	34.3333	Gene: Cre02.g117350, mRNA: Cre02.g117350	Cre02.g117350:c.765+77_765+78delCA
chr2	9051504	SNV	1	C	T	4	20	20	0.25	35.25	CDS: g2819, Gene: g2819, mRNA: g2819	g2819:c.24G>A
chr2	8234983	SNV	1	A	G	11	55	20	0.363636	35.6364
chr2	8642385	SNV	1	A	G	8	40	20	0.375	37.5
chr2	9080147	SNV	1	A	T	4	20	20	0.25	34.5
chr2	9081779	SNV	1	A	T	12	60	20	0	36.9167
chr2	9085477	SNV	1	A	G	9	45	20	0.222222	35.1111
chr3	9211686	Insertion	2	-	TG	4	20	20	0.25	36.25	Gene: g4489, mRNA: g4489	g4489:c.287+133_287+134insTG
chr3	513926	SNV	1	G	T	14	70	20	0.266667	34.9333	Gene: g2926, Five_prime_utr: PAC:26902190.five_prime_UTR.1, mRNA: g2926
chr3	8352145	Deletion	1	G	-	17	85	20	0.470588	32.8824	Gene: Cre03.g198800, Five_prime_utr: PAC:26902141.five_prime_UTR.2, mRNA: Cre03.g198800
chr3	3993746	SNV	1	C	T	9	45	20	0.3	34.7	Gene: Cre03.g171950, mRNA: Cre03.g171950	Cre03.g171950:c.3280-143G>A
chr3	7003088	Deletion	12	ATTGCTCCGCCG	-	8	40	20	0.125	35.5	CDS: Cre03.g208550, Gene: Cre03.g208550, mRNA: Cre03.g208550	Cre03.g208550:c.1724_1735delCGGCGGAGCAAT	Cre03.g208550:p.Ala575_Ser579delinsAla
chr3	4287733	SNV	1	C	A	6	30	20	0.333333	33.6667	CDS: Cre03.g174543, Gene: Cre03.g174543, mRNA: Cre03.g174543	Cre03.g174543:c.427G>T	Cre03.g174543:p.Val143Leu
chr3	6131417	SNV	1	A	G	4	20	20	0.5	37.75
chr3	6934507	SNV	1	A	G	12	60	20	0.5	35.8571
chr4	586103	SNV	1	C	T	10	50	20	0	34.8	CDS: g4569, Gene: g4569, mRNA: g4569	g4569:c.1330G>A	g4569:p.Asp444Asn
chr4	936236	SNV	1	G	A	6	30	20	0.375	34
chr4	3980799	SNV	1	T	C	6	30	20	0.5	37.1667
chr5	2338225	SNV	1	C	T	8	40	20	0.5	37.75	Gene: g5395, mRNA: g5395, mRNA: g5395	g5395:c.[166+11G>A];[166+11G>A]
chr5	624414	Deletion	1	C	-	4	20	20	0.25	26.75	Gene: g5140, mRNA: g5140, mRNA: g5140	g5140:c.[1047+129delG];[1104+129delG]
chr5	1439123	SNV	1	A	G	4	20	20	0.25	37.75	CDS: g5254, Gene: g5254, mRNA: g5254	g5254:c.8151T>C
chr5	1274287	SNV	1	C	A	6	30	20	0.333333	34.6667
chr6	5555308	SNV	1	G	C	7	35	20	0.428571	34.4286	Gene: Cre06.g285300, mRNA: Cre06.g285300	Cre06.g285300:c.2198-73G>C
chr6	2232053	SNV	1	A	C	7	35	20	0.285714	35.7143	CDS: Cre06.g266350, Gene: Cre06.g266350, mRNA: Cre06.g266350	Cre06.g266350:c.2335T>G	Cre06.g266350:p.Trp779Gly
chr6	1676	Insertion	1	-	T	34	170	20	0.382353	33.6471
chr6	4562231	SNV	1	G	T	16	80	20	0.125	35.9375
chr6	4822520	Deletion	1	G	-	4	20	20	0.25	20.25
chr6	6862083	SNV	1	A	G	5	25	20	0.4	33.6
chr6	6862267	SNV	1	G	T	7	35	20	0.285714	35.9286
chr7	4494582	SNV	1	G	A	4	20	20	0.25	35	Gene: g7988, mRNA: g7988	g7988:c.237+472G>A
chr7	1910426	SNV	1	A	C	4	20	20	0.5	37.5	Gene: g7559, mRNA: g7559	g7559:c.319+440A>C
chr7	877362	SNV	1	A	C	4	20	20	0.5	35.5	Gene: g7366, mRNA: g7366	g7366:c.1758-256T>G
chr7	2366197	SNV	1	G	A	9	45	20	0.222222	35.2222	CDS: Cre07.g328300, Gene: Cre07.g328300, mRNA: Cre07.g328300	Cre07.g328300:c.865G>A	Cre07.g328300:p.Glu289Lys
chr7	3090169	Insertion	5	-	GAGTA	4	20	20	0.25	38.5
chr7	3106562	SNV	1	C	T	4	20	20	0	38.5
chr7	3550074	SNV	1	C	T	14	70	20	0.5	36.2857
chr7	3550076	SNV	1	G	A	14	70	20	0.5	36.2857
chr8	4791933	SNV	1	G	A	17	85	20	0.235294	33.5882	Gene: g9045, mRNA: g9045, mRNA: g9045	g9045:c.[872+701G>A];[872+701G>A]
chr8	3258091	SNV	1	C	T	7	35	20	0.142857	37.8571	Gene: g8806, mRNA: g8806, mRNA: g8806	g8806:c.[8924-1190C>T];[8924-1190C>T]
chr8	4349374	Insertion	2	-	CA	10	50	20	0.2	35.45	Gene: Cre08.g381650, mRNA: Cre08.g381650	Cre08.g381650:c.1034+53_1034+54insTG
chr8	1381692	SNV	1	C	T	5	25	20	0	33.6	Gene: Cre08.g364050, mRNA: Cre08.g364050	Cre08.g364050:c.605+95G>A
chr8	2201568	SNV	1	A	G	5	25	20	0	33.6	CDS: g8663, Gene: g8663, mRNA: g8663	g8663:c.1514T>C	g8663:p.Ile505Thr
chr8	1392624	Deletion	1	C	-	4	20	20	0.25	34.5
chr8	2280155	SNV	1	G	A	13	65	20	0.0769231	35.0769
chr8	2731092	SNV	1	C	G	21	105	20	0.227273	34
chr8	2888347	SNV	1	G	T	4	20	20	0	36.5
chr8	3020720	SNV	1	T	G	8	40	20	0.125	36.125
chr8	3034527	SNV	1	T	C	20	100	20	0.47619	37.1905
chr9	3437330	SNV	1	T	C	15	75	20	0.133333	33.1333	Gene: g9636, mRNA: g9636	g9636:c.595+108T>C
chr9	636207	SNV	1	C	T	14	70	20	0.357143	33.2857	Gene: Cre09.g403350, mRNA: Cre09.g403350, Three_prime_utr: PAC:26895964.three_prime_UTR.1
chr9	1153463	Deletion	2	TG	-	4	20	20	0.5	25.5	Gene: Cre09.g400000, mRNA: Cre09.g400000	Cre09.g400000:c.3462-72_3462-71delCA
chr9	2361928	Insertion	2	-	AC	4	20	20	0.25	37.25	Gene: Cre09.g392000, Gene: g9452, mRNA: Cre09.g392000, mRNA: g9452	Cre09.g392000:c.[1424-37_1424-36insAC]; g9452:c.[1424-37_1424-36insAC]
chr9	7436027	SNV	1	C	G	5	25	20	0.333333	36.1667	CDS: g10241, Gene: g10241, mRNA: g10241	g10241:c.1384C>G	g10241:p.Arg462Gly
chr9	318290	SNV	1	A	G	6	30	20	0.166667	35.3333
chr9	318958	SNV	1	T	A	7	35	20	0.142857	33.8571
chr9	322934	SNV	1	T	A	7	35	20	0	35.7143
chr9	323527	SNV	1	A	C	4	20	20	0.25	35.5
chr9	324926	SNV	1	C	A	6	30	20	0	38.5
chr9	325856	SNV	1	C	A	5	25	20	0.4	34.8
chr9	327415	SNV	1	T	G	4	20	20	0.5	36.5
chr9	1489995	SNV	1	A	T	5	25	20	0	36.8
chr9	5442628	SNV	1	C	T	8	40	20	0	36.875
chr9	7359586	SNV	1	T	C	24	120	20	0.5	36.1154
scaffold_22	272	SNV	1	C	T	12	60	20	0.5	36.5833	CDS: g18199, Gene: g18199, mRNA: g18199	g18199:c.1308G>A
scaffold_22	124334	SNV	1	C	A	5	25	20	0.2	36.4
scaffold_25	52169	Deletion	1	T	-	4	20	20	0	39	Gene: g18280, mRNA: g18280	g18280:c.505-72delA
scaffold_25	75052	SNV	1	A	T	5	25	20	0	37.4

## Sheet: Intergenic - 914
Mapping	Reference Position	Type	Length	Reference	Allele	Count	Coverage	Frequency	Forward/reverse balance	Average quality	Overlapping annotations	Coding region change	Amino acid change
scaffold_52	6107	SNV	1	G	C	20	20	100	0.26087	35.5217
chr6	989227	SNV	1	C	T	21	21	100	0.416667	35.3333
chr6	989231	Deletion	1	G	-	21	23	91.3043	0.380952	31.6667
chr10	2825811	SNV	1	C	T	357	401	89.0274	0.047619	34.8207
chr16	5701841	Insertion	1	-	A	17	21	80.9524	0.411765	33.8824
chr11	92380	SNV	1	G	A	20	25	80	0.409091	37.5455
chr9	7776271	SNV	1	G	A	19	25	76	0	35.9474
chr1	329188	SNV	1	A	T	24	32	75	0.416667	34.125
chr2	25491	SNV	1	A	G	118	165	71.5152	0.372881	34.4492
chr16	5588569	Insertion	8	-	ACAGCTAG	20	28	71.4286	0.4	36.6625
chr11	339678	Insertion	8	-	CCGCCGGG	21	30	70	0.47619	37.6964
chr11	3752581	Deletion	1	C	-	81	117	69.2308	0.345679	31.9877
chr11	92376	SNV	1	C	T	20	29	68.9655	0.5	37.125
chr5	274726	SNV	1	A	C	21	32	65.625	0	37.2381
scaffold_22	123496	SNV	1	A	C	95	152	62.5	0.0421053	36.4211
scaffold_22	123498	SNV	1	A	T	95	152	62.5	0.0421053	36.4211
chr9	3968407	Insertion	8	-	GTGCAAAA	41	67	61.194	0.390244	35.7622
chr2	8343765	Deletion	2	AG	-	15	25	60	0.466667	35.7333
chr3	6949835	SNV	1	A	C	16	27	59.2593	0.1875	32.1875
chr8	1632646	Insertion	10	-	CAAATAGTGA	34	58	58.6207	0.382353	37.0912
chr17	3544506	Insertion	8	-	CTGTCGGG	26	45	57.7778	0.384615	36.476
chr5	274747	SNV	1	A	G	25	44	56.8182	0	37.56
chr6	1842034	Insertion	9	-	GACACAGCT	24	43	55.814	0.375	36.6343
chr3	8270892	Insertion	8	-	CGGTCCGA	31	56	55.3571	0.419355	37.0444
chr17	6612621	SNV	1	T	C	26	47	55.3191	0.259259	35.5926
chr5	274729	SNV	1	G	A	21	38	55.2632	0	37.9048
chr12	6646325	SNV	1	C	A	11	20	55	0.166667	35
chr5	1274933	SNV	1	T	C	12	22	54.5455	0.428571	37.2143
chr3	6950169	Deletion	1	C	-	62	114	54.386	0.0483871	32.8387
chr16	7007828	Insertion	8	-	TTGACTCA	25	46	54.3478	0.4	36.76
chr7	2605613	Insertion	8	-	CCACATGG	38	70	54.2857	0.447368	36.4441
chr17	1052015	Insertion	7	-	TACGTTT	58	108	53.7037	0.465517	36.8399
chr16	3873927	Insertion	7	-	GGCGTGC	22	41	53.6585	0.318182	36.539
chr1	2987837	Insertion	10	-	ATCCGCACAA	17	32	53.125	0.176471	37.0529
chr2	6971935	SNV	1	C	T	11	21	52.381	0.454545	36.4545
chr4	3831776	SNV	1	G	C	12	23	52.1739	0.333333	35
chr5	1274926	SNV	1	C	G	13	25	52	0.4	36.5333
chr5	1274541	SNV	1	G	A	15	29	51.7241	0.1875	36.875
chr17	6612614	SNV	1	C	T	18	35	51.4286	0.210526	34.1053
chr3	4366590	Insertion	8	-	GCATCGAG	26	52	50	0.423077	37.4327
chr15	1414821	SNV	1	A	G	10	20	50	0.272727	33.5455
chr12	6777866	SNV	1	G	A	10	20	50	0.1	37.8
chr6	4779953	SNV	1	A	G	25	51	49.0196	0.428571	37
chr7	3549467	SNV	1	G	C	24	49	48.9796	0.125	34.875
chr13	2241530	Insertion	8	-	AATCTGAG	21	43	48.8372	0.285714	36.6548
chr4	212831	Deletion	1	G	-	41	84	48.8095	0.439024	31.2195
chr10	6528520	Insertion	8	-	TCACCGCC	18	37	48.6486	0.444444	36.5625
scaffold_22	12762	SNV	1	T	G	17	35	48.5714	0	36.1176
chr13	4152280	SNV	1	G	C	15	31	48.3871	0.466667	34.5333
chr3	6950172	Insertion	1	-	C	54	112	48.2143	0.0555556	36.5741
chr8	2277650	Insertion	1	-	T	13	27	48.1481	0.153846	36.6154
chr15	1450910	Deletion	1	C	-	24	50	48	0.125	32.9167
chr6	5075752	Insertion	8	-	GTCAGGAA	22	46	47.8261	0.454545	35.2102
chr16	6098405	Insertion	1	-	C	11	23	47.8261	0.272727	36.0909
chr5	1274910	SNV	1	G	A	10	21	47.619	0.3	36.4
chr2	8912312	SNV	1	G	T	10	21	47.619	0.3	35.8
chr4	1140852	SNV	1	C	A	18	38	47.3684	0.45	36.7
chr3	3816905	Insertion	7	-	GTCCCGA	18	38	47.3684	0.444444	37.873
chr5	1274949	SNV	1	G	A	14	30	46.6667	0.4375	36.375
chr8	2280473	SNV	1	G	A	26	56	46.4286	0.0384615	36.8269
chr8	2280474	SNV	1	C	G	26	56	46.4286	0.0384615	36.8269
scaffold_22	122296	SNV	1	T	G	11	24	45.8333	0.0909091	36.0455
chr7	3549431	SNV	1	A	G	28	62	45.1613	0.172414	35.0345
chr11	1877535	SNV	1	T	C	9	20	45	0.181818	36.8182
chr8	2277644	SNV	1	A	C	12	27	44.4444	0.230769	37.1538
chr7	3549427	SNV	1	G	C	28	63	44.4444	0.3	34.7333
chr2	6971902	SNV	1	A	G	12	27	44.4444	0.461538	36
chr2	8912272	SNV	1	G	C	11	25	44	0.363636	36.4545
chr10	2370376	SNV	1	A	G	10	23	43.4783	0.363636	35.5455
chr2	6971897	Deletion	1	G	-	13	30	43.3333	0.461538	30.5385
scaffold_22	123506	Deletion	2	TT	-	69	161	42.8571	0.057971	35.3043
chr4	3831769	SNV	1	G	A	12	28	42.8571	0.333333	34.4167
chr1	3288234	Deletion	1	G	-	9	21	42.8571	0.333333	30.3333
chr4	3981502	SNV	1	T	G	17	40	42.5	0.4	38.05
chr1	383534	SNV	1	A	G	11	26	42.3077	0.272727	35.4545
chr7	3550032	SNV	1	G	A	24	57	42.1053	0.333333	35.3333
chr5	2416554	SNV	1	C	T	27	65	41.5385	0.482759	35.6552
chr9	1495655	SNV	1	A	G	29	70	41.4286	0.433333	36.4667
chr8	2277783	SNV	1	G	T	12	29	41.3793	0.230769	35.6154
scaffold_21	134278	SNV	1	G	A	26	63	41.2698	0.464286	35.4643
chr7	3549448	Deletion	4	GGGC	-	23	56	41.0714	0.130435	30.2609
chr10	4953483	SNV	1	T	C	23	56	41.0714	0	36.3913
chr13	4152280	Insertion	8	-	CCCATGGC	32	78	41.0256	0.5	35.5664
chr16	665647	SNV	1	G	T	9	22	40.9091	0.333333	35.6667
chr10	3623256	SNV	1	T	C	9	22	40.9091	0.333333	37.6667
chr7	3549399	Deletion	1	G	-	37	91	40.6593	0.189189	33.3514
chr4	1140857	SNV	1	T	C	15	37	40.5405	0.375	36.1875
scaffold_23	74920	SNV	1	A	C	17	42	40.4762	0	35.2353
chr4	212860	SNV	1	C	T	21	52	40.3846	0.380952	33.619
chr8	3775498	SNV	1	T	G	8	20	40	0.444444	36.5556
chr7	3199950	SNV	1	G	C	10	25	40	0	37.9
chr4	821893	SNV	1	T	A	24	60	40	0.166667	38
chr3	4523267	SNV	1	A	T	16	40	40	0.25	35.9062
chr3	4523269	SNV	1	G	T	16	40	40	0.25	35.9062
chr16	3292976	SNV	1	G	A	16	40	40	0.3125	36.5
chr1	990413	SNV	1	C	G	14	35	40	0.0666667	37.4
chr10	3539001	SNV	1	G	A	17	43	39.5349	0.294118	36.4118
chr1	990355	SNV	1	C	G	17	43	39.5349	0.210526	35.8421
chr4	714241	SNV	1	C	T	15	38	39.4737	0.266667	35.8
chr2	6618477	SNV	1	A	G	15	38	39.4737	0.375	36.6875
chr8	3775531	SNV	1	C	T	11	28	39.2857	0.416667	34.8333
chr4	793805	SNV	1	G	A	18	46	39.1304	0.333333	35.2222
chr17	981288	SNV	1	G	C	9	23	39.1304	0.4	36.7
chr17	984879	SNV	1	G	C	18	46	39.1304	0.368421	36
chr12	6777810	SNV	1	C	T	9	23	39.1304	0.333333	37.1111
chr7	3550049	SNV	1	A	C	22	57	38.5965	0.409091	36.2727
chr5	2362163	SNV	1	G	A	10	26	38.4615	0.25	35.4167
chr4	259301	SNV	1	T	C	10	26	38.4615	0	35.7
chr3	6950759	SNV	1	C	A	68	177	38.4181	0.176471	36.6324
chr2	2644	SNV	1	T	A	52	136	38.2353	0.358491	36.4717
scaffold_30	9729	SNV	1	T	C	8	21	38.0952	0.375	38.625
chr3	1735968	Insertion	8	-	AGCTGAAC	16	42	38.0952	0.125	38.8281
chr2	9076635	SNV	1	T	G	8	21	38.0952	0.444444	36.8889
chr10	3540130	SNV	1	C	T	16	42	38.0952	0.3125	36.5
chr1	3166419	SNV	1	C	G	8	21	38.0952	0.375	35.375
chr9	318659	SNV	1	A	C	44	116	37.931	0.446809	36.234
chr6	6688836	SNV	1	C	T	14	37	37.8378	0.285714	37
chr4	212866	SNV	1	T	A	14	37	37.8378	0.142857	35.5714
chr3	1035604	SNV	1	T	C	14	37	37.8378	0.4375	35.625
chr7	3549398	SNV	1	T	C	32	85	37.6471	0.205882	36.0294
chr4	1140873	SNV	1	C	T	12	32	37.5	0.333333	36.8333
chr15	1434052	SNV	1	T	C	12	32	37.5	0.384615	36.7692
chr11	3730234	Insertion	8	-	GCAACAAG	21	56	37.5	0.285714	36.5833
chr5	46823	SNV	1	C	T	25	67	37.3134	0.36	35
chr12	6641923	SNV	1	A	C	22	59	37.2881	0.434783	34.7826
chr15	1450907	Insertion	1	-	T	19	51	37.2549	0.157895	35.5789
chr8	41585	SNV	1	C	T	10	27	37.037	0.1	35.4
chr11	2378066	SNV	1	G	C	73	199	36.6834	0.342466	36.0822
chr11	2378067	SNV	1	G	A	73	199	36.6834	0.342466	36.0822
chr11	2378069	SNV	1	G	A	73	199	36.6834	0.342466	36.0822
chr8	2280260	SNV	1	A	G	11	30	36.6667	0.5	36.6667
chr4	966112	SNV	1	G	A	11	30	36.6667	0.272727	37.7273
chr2	2652434	SNV	1	C	A	11	30	36.6667	0.454545	35.1818
chr2	8323192	SNV	1	G	A	11	30	36.6667	0.0909091	37.5455
chr15	1409064	SNV	1	C	T	11	30	36.6667	0.0909091	34.5455
chr11	2692673	Insertion	8	-	CCTCGCAG	11	30	36.6667	0.454545	34.5682
chr4	714493	SNV	1	G	T	19	52	36.5385	0.25	35.85
chr11	2378084	SNV	1	C	T	38	104	36.5385	0.35	34.975
chr6	6862203	SNV	1	T	A	16	44	36.3636	0.5	34.375
chr6	6862205	SNV	1	C	T	16	44	36.3636	0.5	34.375
chr15	1409665	SNV	1	C	G	20	55	36.3636	0.285714	36.8571
chr11	2372645	SNV	1	G	A	8	22	36.3636	0	33.625
chr1	3166442	SNV	1	G	C	8	22	36.3636	0.375	34.25
chr12	9002764	SNV	1	G	T	45	124	36.2903	0.4	36.2444
chr2	6618483	SNV	1	G	C	13	36	36.1111	0.466667	35.5333
chr8	3033755	SNV	1	G	T	9	25	36	0	35
chr6	147079	Insertion	5	-	AGTGC	9	25	36	0.444444	36.3333
chr14	2132910	SNV	1	C	T	9	25	36	0.333333	34.8889
chr2	9005634	SNV	1	T	C	25	70	35.7143	0.384615	35.3462
chr17	984874	SNV	1	C	T	15	42	35.7143	0.4375	36.625
chr16	670492	SNV	1	A	C	10	28	35.7143	0.1	38.3
chr6	3510853	SNV	1	A	T	16	45	35.5556	0.1875	35.875
chr17	4287326	Deletion	1	T	-	38	107	35.514	0.421053	31.0526
chr16	670402	Deletion	1	C	-	11	31	35.4839	0.272727	34.0909
chr15	1816611	SNV	1	G	A	33	93	35.4839	0.268293	36.8049
chr2	2614	SNV	1	T	C	52	148	35.1351	0.462963	36.2778
scaffold_21	173380	SNV	1	G	A	7	20	35	0	36.4286
chr6	805283	SNV	1	G	C	7	20	35	0.142857	33.4286
chr5	274652	SNV	1	T	G	7	20	35	0	36.5714
chr5	274654	SNV	1	T	C	7	20	35	0	36.5714
chr2	6629723	SNV	1	C	A	7	20	35	0.428571	36
chr17	7188044	SNV	1	G	T	14	40	35	0.142857	38.1429
chr16	3282204	SNV	1	C	G	7	20	35	0	35.7143
chr16	3933737	SNV	1	C	A	7	20	35	0.285714	38.5
chr15	1423972	SNV	1	C	T	7	20	35	0.428571	37.1429
chr4	737888	SNV	1	G	T	15	43	34.8837	0.333333	35.2667
chr7	2605613	SNV	1	G	C	8	23	34.7826	0.25	35.125
chr6	6862244	Deletion	2	CG	-	16	46	34.7826	0.3125	31.25
chr3	2192012	SNV	1	C	G	8	23	34.7826	0.5	34.125
chr1	990169	SNV	1	A	C	8	23	34.7826	0	36.25
chr6	6862238	Deletion	1	A	-	17	49	34.6939	0.411765	31.1176
chr8	3091785	SNV	1	C	T	9	26	34.6154	0	37.7778
chr8	3091786	SNV	1	C	T	9	26	34.6154	0	37.7778
chr15	1813759	SNV	1	T	C	10	29	34.4828	0.3	34.6
chr13	4263893	SNV	1	C	G	10	29	34.4828	0	37.2
chr10	3601870	Deletion	1	T	-	10	29	34.4828	0.1	37.8
chr15	1820574	Insertion	1	-	T	11	32	34.375	0.0909091	33.6364
chr1	990292	SNV	1	T	G	11	32	34.375	0.454545	36.0909
chr15	1909992	SNV	1	C	A	25	73	34.2466	0.192308	35.9615
scaffold_22	122635	Deletion	1	C	-	26	76	34.2105	0.153846	34.8846
chr10	6573173	SNV	1	A	T	31	91	34.0659	0.451613	35.5484
chr17	7088716	SNV	1	A	G	17	50	34	0.411765	32.5882
scaffold_22	123822	Deletion	1	C	-	9	27	33.3333	0.444444	29.6667
chr8	3069311	SNV	1	G	T	22	66	33.3333	0.136364	36.3182
chr6	3510868	SNV	1	C	T	11	33	33.3333	0.166667	37
chr4	714238	SNV	1	T	A	11	33	33.3333	0.181818	37.7273
chr3	6949937	SNV	1	A	T	48	144	33.3333	0.0980392	37.7059
chr3	6955044	SNV	1	G	A	12	36	33.3333	0.0833333	36.0833
chr17	4974230	SNV	1	C	T	13	39	33.3333	0.5	34.2143
chr16	3282225	SNV	1	T	G	7	21	33.3333	0	36.8571
chr15	1419261	SNV	1	G	T	14	42	33.3333	0.357143	37.5
chr15	1419262	SNV	1	T	C	14	42	33.3333	0.357143	37.5
chr15	1424053	SNV	1	C	T	7	21	33.3333	0.285714	34.1429
chr14	674297	SNV	1	G	T	7	21	33.3333	0.285714	36.2857
chr12	6641919	SNV	1	A	C	18	54	33.3333	0.421053	36.6842
chr11	92339	SNV	1	C	T	9	27	33.3333	0.333333	35.5
chr11	429915	SNV	1	T	G	9	27	33.3333	0	36.7778
chr10	3540152	SNV	1	G	A	16	48	33.3333	0.294118	36.9412
chr3	8400293	SNV	1	A	C	573	1738	32.9689	0.26087	35.7252
chr2	2656	SNV	1	G	C	45	137	32.8467	0.444444	36.1556
scaffold_22	123399	SNV	1	G	C	20	61	32.7869	0.05	32.55
chr15	1409636	SNV	1	A	G	17	52	32.6923	0.166667	37.2778
scaffold_38	23032	SNV	1	T	C	15	46	32.6087	0.466667	37.2667
chr11	3752583	SNV	1	T	G	28	86	32.5581	0.142857	36.6429
chr4	212871	SNV	1	G	T	12	37	32.4324	0.166667	37.0833
chr9	319787	SNV	1	T	C	10	31	32.2581	0.25	35.4167
chr9	2355928	SNV	1	G	A	92	286	32.1678	0.489583	36.5833
chr11	3752579	SNV	1	T	A	55	171	32.1637	0.254545	36.1273
scaffold_23	83514	SNV	1	C	T	9	28	32.1429	0.444444	35.2222
scaffold_22	122194	Deletion	1	C	-	18	56	32.1429	0.388889	31.9444
chr7	1805781	SNV	1	G	T	9	28	32.1429	0	37.2222
chr7	1805782	SNV	1	A	T	9	28	32.1429	0	37.2222
chr6	490400	SNV	1	A	C	9	28	32.1429	0.444444	34.3333
chr13	709	SNV	1	A	G	9	28	32.1429	0.333333	36.8889
chr4	1140669	SNV	1	C	T	24	75	32	0.08	36.04
chr3	7139724	SNV	1	C	T	8	25	32	0.125	38.25
chr16	3933730	SNV	1	G	A	8	25	32	0.25	38
chr9	48716	Deletion	1	G	-	15	47	31.9149	0.0666667	32.8667
scaffold_44	3426	SNV	1	G	A	7	22	31.8182	0.375	37.125
scaffold_31	9901	SNV	1	A	T	7	22	31.8182	0.285714	35.2857
chr6	4567980	SNV	1	G	A	7	22	31.8182	0.375	35.5
chr14	674293	SNV	1	C	T	7	22	31.8182	0.285714	36
chr11	3213784	Deletion	1	C	-	7	22	31.8182	0.428571	34.7143
chr1	990150	Insertion	1	-	T	7	22	31.8182	0	36.2857
chr7	3550058	SNV	1	A	G	20	63	31.746	0.4	36.35
chr15	1753002	SNV	1	G	A	20	63	31.746	0.25	35.85
chr15	1753840	SNV	1	A	G	26	82	31.7073	0.392857	35.3571
chr15	1588441	SNV	1	T	C	12	38	31.5789	0.333333	37.4167
chr8	2280252	SNV	1	T	A	11	35	31.4286	0.454545	37.2727
chr8	2280253	SNV	1	T	C	11	35	31.4286	0.454545	37.2727
chr14	2086733	Deletion	4	ACAT	-	11	35	31.4286	0.454545	34.7273
chr10	4953475	SNV	1	C	A	16	51	31.3725	0	37.375
chr7	3550054	SNV	1	C	A	20	64	31.25	0.45	36
scaffold_40	22059	SNV	1	T	C	9	29	31.0345	0	38.7778
scaffold_22	122137	SNV	1	A	C	9	29	31.0345	0.2	38.3
chr4	1140887	SNV	1	C	T	9	29	31.0345	0.5	37.1
chr9	324472	SNV	1	C	A	48	155	30.9677	0.145833	34.8333
scaffold_22	20654	Insertion	1	-	G	12	39	30.7692	0.166667	35.5833
scaffold_22	20655	Insertion	1	-	G	12	39	30.7692	0.166667	35.9167
chr6	4720709	SNV	1	G	A	8	26	30.7692	0.25	38
chr4	2563650	SNV	1	G	A	12	39	30.7692	0.416667	33.3333
chr3	5074	SNV	1	C	T	8	26	30.7692	0.25	37.5
chr3	5075	SNV	1	C	T	8	26	30.7692	0.25	37.5
chr2	2662	SNV	1	T	C	32	104	30.7692	0.40625	35.4375
chr16	670334	SNV	1	C	A	12	39	30.7692	0.333333	38.6667
chr12	5799869	SNV	1	C	T	23	75	30.6667	0.0869565	35.7826
chr10	6573176	Insertion	1	-	T	30	98	30.6122	0.466667	35.4667
chr15	1412577	SNV	1	T	G	11	36	30.5556	0.454545	36.4545
chr15	1412578	SNV	1	C	A	11	36	30.5556	0.454545	36.4545
chr15	1753575	SNV	1	G	A	11	36	30.5556	0.363636	37.0909
chr12	6762220	SNV	1	A	T	11	36	30.5556	0.181818	35.6364
scaffold_22	122564	Deletion	1	A	-	79	259	30.5019	0.202532	34.8101
scaffold_39	22168	SNV	1	A	G	132	433	30.485	0.0814815	36.7407
chr5	2395389	SNV	1	A	T	7	23	30.4348	0.375	35.75
chr4	794949	SNV	1	C	T	42	138	30.4348	0.5	35.1591
chr3	6131512	Deletion	1	T	-	7	23	30.4348	0.285714	31
chr3	6934563	SNV	1	G	C	14	46	30.4348	0.214286	34.0714
chr17	969784	SNV	1	C	T	7	23	30.4348	0	37.1429
chr16	3428518	SNV	1	G	A	24	79	30.3797	0.333333	34.8519
chr15	1636498	SNV	1	C	A	48	158	30.3797	0.5	34.8958
chr6	6862425	SNV	1	T	G	17	56	30.3571	0.352941	33.6471
chr2	8192864	SNV	1	T	C	17	56	30.3571	0.235294	36.5294
chr6	4722539	SNV	1	A	G	10	33	30.303	0.4	38
chr12	6579451	SNV	1	G	C	10	33	30.303	0.5	36.3
chr8	3070645	SNV	1	C	T	16	53	30.1887	0.0625	37.8333
chr8	3070646	SNV	1	T	A	16	53	30.1887	0.0625	37.8333
scaffold_23	116107	SNV	1	G	A	9	30	30	0.4	35.8
chr9	327652	SNV	1	C	T	6	20	30	0.333333	36
chr7	3550130	SNV	1	T	G	30	100	30	0.40625	34.4688
chr2	2605	SNV	1	A	G	39	130	30	0.487179	36.6026
chr2	2606	SNV	1	A	G	39	130	30	0.487179	36.6026
chr15	247256	SNV	1	A	C	27	90	30	0.285714	35
chr15	1450871	SNV	1	C	T	6	20	30	0.166667	37.5
chr1	7189064	SNV	1	A	G	9	30	30	0	35.8889
scaffold_23	23159	SNV	1	A	T	14	47	29.7872	0	37.1429
scaffold_21	53693	SNV	1	A	G	11	37	29.7297	0.0909091	34.7273
chr9	7236793	SNV	1	T	C	11	37	29.7297	0.272727	34.7273
chr8	3068450	SNV	1	G	T	11	37	29.7297	0.230769	37.0769
chr3	8270885	Deletion	1	C	-	19	64	29.6875	0.473684	30.8947
scaffold_22	123535	SNV	1	C	T	51	172	29.6512	0.352941	37.1373
scaffold_22	123536	SNV	1	T	G	51	172	29.6512	0.352941	37.1373
scaffold_22	122638	Insertion	1	-	C	24	81	29.6296	0.125	38.4583
chr4	3831745	SNV	1	C	T	8	27	29.6296	0.25	37.4375
chr4	3831747	SNV	1	C	T	8	27	29.6296	0.25	37.4375
chr17	964857	SNV	1	C	A	8	27	29.6296	0.375	36.8125
chr17	964858	SNV	1	G	A	8	27	29.6296	0.375	36.8125
chr16	670371	SNV	1	T	G	8	27	29.6296	0.333333	36.8889
chr16	5456386	SNV	1	A	G	8	27	29.6296	0.5	34.625
chr6	6862402	SNV	1	T	G	13	44	29.5455	0.307692	36.1538
chr8	3171831	SNV	1	C	T	10	34	29.4118	0.416667	37.3333
chr16	2872355	SNV	1	G	A	47	160	29.375	0.313725	37
chr15	247262	Deletion	1	G	-	26	89	29.2135	0.230769	31.6154
chr3	6951333	SNV	1	A	C	7	24	29.1667	0.25	36.625
chr3	7139719	SNV	1	G	T	7	24	29.1667	0.142857	38.2857
chr2	8192703	SNV	1	A	G	7	24	29.1667	0.142857	35.3571
chr9	322241	SNV	1	T	C	16	55	29.0909	0.5	34.6667
chr11	2367473	SNV	1	T	C	48	165	29.0909	0.254902	36.9608
scaffold_34	10041	SNV	1	C	T	9	31	29.0323	0.444444	35.6667
chr9	318287	SNV	1	T	A	9	31	29.0323	0.111111	35.4444
chr6	6862380	SNV	1	C	T	9	31	29.0323	0.444444	34.8889
chr2	2999716	SNV	1	C	A	9	31	29.0323	0.111111	37.9444
chr2	5660566	SNV	1	A	T	9	31	29.0323	0.222222	36.8889
chr3	7730662	Deletion	1	C	-	11	38	28.9474	0.0909091	28.6364
chr15	1419268	SNV	1	A	G	11	38	28.9474	0.454545	36.7273
chr10	4954448	Deletion	2	TG	-	17	59	28.8136	0.352941	34.1765
chr15	247230	Deletion	1	A	-	19	66	28.7879	0.315789	29.2632
chr9	318585	SNV	1	A	C	27	94	28.7234	0.111111	35.8889
chr7	3550126	SNV	1	T	C	33	115	28.6957	0.4	35.2286
scaffold_22	11856	SNV	1	T	C	8	28	28.5714	0.5	35.125
chr9	7696058	SNV	1	T	C	6	21	28.5714	0.166667	34.8333
chr8	2277291	SNV	1	T	C	8	28	28.5714	0.4	37.6
chr8	3775561	SNV	1	C	T	6	21	28.5714	0.333333	35.3333
chr5	1273205	SNV	1	A	G	8	28	28.5714	0.111111	36.1111
chr17	7088745	Insertion	1	-	C	14	49	28.5714	0.285714	34.1429
chr15	1404975	SNV	1	T	G	10	35	28.5714	0.3	35.9
chr15	1414574	SNV	1	C	T	16	56	28.5714	0.4375	37.8125
chr13	4353060	SNV	1	C	T	12	42	28.5714	0.416667	33.5
chr12	902076	SNV	1	G	T	8	28	28.5714	0	36.125
chr10	6573086	SNV	1	C	A	26	91	28.5714	0.230769	37.1154
chr2	9067171	SNV	1	G	A	25	88	28.4091	0.346154	35.5
chr14	4144096	SNV	1	C	A	23	81	28.3951	0.434783	37.0435
chr6	1677	SNV	1	T	G	36	127	28.3465	0.459459	34.8108
chr15	1485211	SNV	1	G	A	11	39	28.2051	0.0909091	35
chr8	3066994	SNV	1	A	T	20	71	28.169	0.25	34.75
scaffold_34	29481	SNV	1	G	T	9	32	28.125	0	38.1111
chr9	318326	SNV	1	C	A	27	96	28.125	0.25	36.2143
chr3	6131465	SNV	1	G	A	9	32	28.125	0.333333	36
chr17	970094	SNV	1	G	A	9	32	28.125	0.444444	34.5556
chr17	2549235	SNV	1	A	C	9	32	28.125	0.222222	35.5556
chr12	3105380	SNV	1	G	T	9	32	28.125	0	38.2778
chr12	3105381	SNV	1	C	G	9	32	28.125	0	38.2778
chr12	9002055	Deletion	1	A	-	18	64	28.125	0.166667	30.1111
chr2	9005615	SNV	1	C	T	30	107	28.0374	0.3	36.8667
scaffold_22	11747	SNV	1	C	T	7	25	28	0.428571	35.8571
scaffold_22	122006	SNV	1	G	C	7	25	28	0.428571	34.8571
chr6	44677	SNV	1	G	A	7	25	28	0.142857	37
chr5	1273216	SNV	1	T	G	7	25	28	0.125	35
chr4	936273	SNV	1	A	G	7	25	28	0.285714	35.1429
chr3	6951448	SNV	1	T	C	7	25	28	0.375	35.75
chr2	2924550	SNV	1	G	T	7	25	28	0	35.8571
chr2	9067320	SNV	1	T	C	7	25	28	0.142857	38.2857
chr2	9067322	SNV	1	G	T	7	25	28	0.142857	38.2857
chr15	1421830	SNV	1	C	T	7	25	28	0	37.8571
chr8	3070506	SNV	1	T	C	31	111	27.9279	0.354839	36.3548
scaffold_22	123517	SNV	1	T	C	52	187	27.8075	0.153846	37.5962
scaffold_39	7925	SNV	1	G	A	10	36	27.7778	0.272727	37.0909
chr17	981227	SNV	1	G	A	15	54	27.7778	0.266667	34.4667
chr9	2355910	SNV	1	A	C	74	267	27.7154	0.428571	36.1818
chr11	2378951	SNV	1	A	C	23	83	27.7108	0.125	37.4583
chr12	889041	SNV	1	G	C	29	105	27.619	0.137931	36.5862
chr12	889042	SNV	1	G	A	29	105	27.619	0.137931	36.5862
chr11	2378059	SNV	1	T	G	119	431	27.6102	0.412698	35.4365
chr7	1705453	Insertion	1	-	T	8	29	27.5862	0.25	38.125
chr4	927105	SNV	1	G	A	8	29	27.5862	0	37.75
chr3	6951325	SNV	1	T	C	8	29	27.5862	0.222222	37.1111
chr16	5716277	SNV	1	C	T	8	29	27.5862	0.125	32.75
chr12	902069	SNV	1	T	C	8	29	27.5862	0	36.75
chr7	3550109	SNV	1	C	T	27	98	27.551	0.357143	36.25
chr16	2874341	SNV	1	G	A	19	69	27.5362	0.157895	36.2105
chr6	6862235	SNV	1	G	C	14	51	27.451	0.285714	34.3571
scaffold_22	99629	Deletion	1	C	-	9	33	27.2727	0.111111	34.7778
scaffold_22	99631	Deletion	1	C	-	9	33	27.2727	0.111111	35.7778
scaffold_22	123831	SNV	1	A	C	9	33	27.2727	0.363636	36.1818
chr9	317685	SNV	1	G	A	12	44	27.2727	0	37.25
chr9	413939	SNV	1	G	A	12	44	27.2727	0.230769	33.6154
chr9	5295568	SNV	1	A	G	6	22	27.2727	0.166667	38.4167
chr9	5295569	SNV	1	T	G	6	22	27.2727	0.166667	38.4167
chr9	7782920	SNV	1	T	C	6	22	27.2727	0	37.6667
chr8	42393	SNV	1	A	G	30	110	27.2727	0.451613	34.8387
chr6	6862044	SNV	1	T	A	6	22	27.2727	0.166667	36
chr6	8842931	SNV	1	T	C	6	22	27.2727	0.5	35.6667
chr3	2204597	SNV	1	G	A	6	22	27.2727	0	37.5
chr6	6862191	SNV	1	T	C	10	37	27.027	0.3	35.45
chr6	6862193	SNV	1	C	T	10	37	27.027	0.3	35.45
chr9	2355917	SNV	1	A	T	72	267	26.9663	0.388889	37.25
chr9	2355919	SNV	1	A	C	72	267	26.9663	0.388889	37.25
scaffold_23	23146	SNV	1	T	C	14	52	26.9231	0	37
scaffold_23	83468	SNV	1	G	C	7	26	26.9231	0.25	36.75
chr9	4676989	SNV	1	C	A	21	78	26.9231	0	37.0952
chr14	2114765	SNV	1	T	A	7	26	26.9231	0	34.5714
chr17	965099	SNV	1	C	A	11	41	26.8293	0.363636	37.2273
chr17	965101	SNV	1	G	T	11	41	26.8293	0.363636	37.2273
chr4	821645	SNV	1	T	C	15	56	26.7857	0.333333	37.0667
scaffold_22	123545	SNV	1	C	T	34	127	26.7717	0.411765	37.0441
chr9	325510	SNV	1	A	G	27	101	26.7327	0.482759	35.2759
chr8	2277300	SNV	1	A	C	8	30	26.6667	0.444444	37.3333
chr3	6950271	SNV	1	T	C	8	30	26.6667	0.333333	34.5556
chr15	1419271	SNV	1	G	A	12	45	26.6667	0.416667	37.3333
chr3	6950671	SNV	1	C	T	66	248	26.6129	0.439394	35.053
chr4	901669	SNV	1	C	A	25	94	26.5957	0.36	36.28
chr8	3781717	SNV	1	A	G	21	79	26.5823	0.333333	37.4762
chr4	739612	SNV	1	A	T	43	162	26.5432	0.304348	36.1522
chr9	413953	SNV	1	C	T	13	49	26.5306	0.5	33.9286
chr1	7439898	SNV	1	A	G	13	49	26.5306	0	36.0769
chr4	736117	SNV	1	G	T	9	34	26.4706	0	33.6667
chr15	1421855	SNV	1	G	C	9	34	26.4706	0	38.4444
chr2	8642424	SNV	1	A	G	14	53	26.4151	0.357143	35.5
chr1	777976	Deletion	2	CG	-	14	53	26.4151	0.357143	32.3571
scaffold_22	26089	SNV	1	A	G	10	38	26.3158	0.3	35.8
chr15	105901	SNV	1	A	C	5	19	26.3158	0	36.6
chr15	105902	SNV	1	T	C	5	19	26.3158	0	36.6
chr8	2280552	SNV	1	C	T	16	61	26.2295	0.125	36.625
chr9	322357	SNV	1	G	T	11	42	26.1905	0.272727	33.7273
chr6	6862399	SNV	1	T	C	11	42	26.1905	0.272727	37.7273
chr4	821959	SNV	1	C	T	11	42	26.1905	0.454545	33.3636
scaffold_34	14550	Deletion	1	C	-	28	107	26.1682	0.142857	35.0714
chr6	3510579	SNV	1	C	G	17	65	26.1538	0.368421	37.1053
chr4	795492	SNV	1	T	C	17	65	26.1538	0.235294	35.4706
scaffold_22	123492	SNV	1	C	T	57	218	26.1468	0.12069	35.069
chr9	5307390	SNV	1	G	A	6	23	26.087	0	36.6667
chr9	7696084	Deletion	1	C	-	6	23	26.087	0.333333	28.1667
chr8	3782217	SNV	1	A	C	12	46	26.087	0.461538	37.3846
chr6	3510575	SNV	1	G	A	18	69	26.087	0.421053	36.8421
chr3	6950162	SNV	1	A	T	48	184	26.087	0.0208333	35.25
chr2	8465092	SNV	1	C	T	6	23	26.087	0.5	37.3333
chr2	9070204	SNV	1	T	A	6	23	26.087	0	38.3333
chr17	980659	SNV	1	G	A	6	23	26.087	0.5	36
chr15	105840	SNV	1	G	A	6	23	26.087	0.5	35.25
chr15	1424884	SNV	1	T	G	12	46	26.087	0.416667	34.5833
chr15	1483856	SNV	1	G	A	6	23	26.087	0.5	36.0833
chr15	1483858	SNV	1	G	A	6	23	26.087	0.5	36.0833
chr10	195	Deletion	1	C	-	6	23	26.087	0.333333	19.8333
chr1	6130042	Insertion	2	-	CA	30	115	26.087	0.5	33.7333
chr9	322231	SNV	1	C	A	19	73	26.0274	0.4	36.55
chr2	2595604	SNV	1	G	A	13	50	26	0.5	34.6429
chr17	984939	SNV	1	T	A	13	50	26	0.461538	37.4615
chr3	6949966	SNV	1	C	A	33	127	25.9843	0.0882353	37.3235
chr1	6130036	SNV	1	C	T	20	77	25.974	0.3	32.85
chr9	325005	SNV	1	A	C	7	27	25.9259	0.428571	36.2143
chr9	325007	SNV	1	C	T	7	27	25.9259	0.428571	36.2143
chr7	3550105	SNV	1	T	A	21	81	25.9259	0.238095	34.7619
chr15	1486712	SNV	1	G	A	7	27	25.9259	0.142857	35
chr12	6579433	SNV	1	C	T	7	27	25.9259	0.285714	34.7143
chr12	9002057	SNV	1	A	G	15	58	25.8621	0.25	34.125
chr9	321698	SNV	1	T	C	16	62	25.8065	0.470588	35.7059
scaffold_38	22292	SNV	1	T	C	17	66	25.7576	0.352941	36.4706
chr4	738313	SNV	1	C	T	83	323	25.6966	0.325301	36.8012
chr4	738314	SNV	1	C	T	83	323	25.6966	0.325301	36.8012
chr3	6934567	SNV	1	A	G	10	39	25.641	0.3	35.3
chr3	7730666	SNV	1	G	A	10	39	25.641	0.2	33.4
chr17	970105	Deletion	1	G	-	10	39	25.641	0.4	33
chr15	1751319	SNV	1	G	T	10	39	25.641	0.3	36.9
scaffold_22	99853	SNV	1	C	A	11	43	25.5814	0.363636	33.4545
chr8	2280241	SNV	1	T	A	11	43	25.5814	0.5	38.0833
chr13	4353067	Deletion	1	A	-	11	43	25.5814	0.272727	27.4545
chr3	6951506	SNV	1	C	T	12	47	25.5319	0.466667	35.7333
chr2	8192869	SNV	1	C	T	12	47	25.5319	0.25	37.0833
chr15	1753079	SNV	1	A	T	24	94	25.5319	0.4	36.52
chr12	903942	SNV	1	C	T	12	47	25.5319	0.166667	35.5833
scaffold_23	51977	SNV	1	A	T	38	149	25.5034	0.131579	36.7632
chr6	6852801	SNV	1	A	T	13	51	25.4902	0.5	35.3571
chr11	3752020	SNV	1	C	G	13	51	25.4902	0.384615	35.1538
scaffold_23	52390	SNV	1	T	G	15	59	25.4237	0.333333	36.8667
chr16	4039432	SNV	1	T	C	15	59	25.4237	0.470588	35.3529
chr11	2366185	SNV	1	A	T	30	118	25.4237	0.1	36.0333
chr9	328715	SNV	1	T	G	16	63	25.3968	0.25	34.8438
chr4	738669	SNV	1	G	A	17	67	25.3731	0.235294	34.1765
scaffold_44	4666	SNV	1	G	A	19	75	25.3333	0.47619	36.2857
chr4	739656	SNV	1	G	A	23	91	25.2747	0.304348	35.7391
scaffold_44	1414	SNV	1	A	T	7	28	25	0.142857	37.5714
scaffold_44	1488	SNV	1	G	A	10	40	25	0.454545	34.8182
scaffold_22	11998	SNV	1	C	G	5	20	25	0.2	36
scaffold_22	12731	SNV	1	A	C	6	24	25	0	36.3333
scaffold_22	123549	SNV	1	C	A	34	136	25	0.411765	36.8235
scaffold_21	53590	SNV	1	G	C	9	36	25	0	38.7778
scaffold_21	76453	SNV	1	C	T	6	24	25	0.428571	35.8571
chr9	317706	SNV	1	T	A	21	84	25	0.318182	35.1818
chr9	327382	SNV	1	C	A	5	20	25	0.333333	36.6667
chr8	3761933	SNV	1	T	G	5	20	25	0.2	35.2
chr7	1133354	Deletion	3	CAA	-	7	28	25	0.285714	30.4286
chr7	3549487	SNV	1	T	A	12	48	25	0.25	35.6667
chr7	3549488	SNV	1	T	G	12	48	25	0.25	35.6667
chr6	3506634	SNV	1	G	T	6	24	25	0.5	38.3333
chr6	3506635	SNV	1	G	C	6	24	25	0.5	38.3333
chr6	3510439	SNV	1	C	T	8	32	25	0.4	33.3
chr6	4701343	SNV	1	G	A	5	20	25	0	38.8
chr5	2395398	SNV	1	T	C	5	20	25	0.4	33.8
chr4	475781	SNV	1	C	T	7	28	25	0	36.4286
chr4	936765	SNV	1	G	A	7	28	25	0.428571	36.4286
chr4	936917	SNV	1	C	T	5	20	25	0.2	35.4
chr2	8909674	SNV	1	A	G	5	20	25	0.2	37.2
chr17	978783	SNV	1	A	T	8	32	25	0.25	38.875
chr17	985002	SNV	1	C	T	11	44	25	0.333333	34.9167
chr17	6132327	Insertion	3	-	GAC	13	52	25	0.461538	33.4615
chr16	3264040	Deletion	1	G	-	7	28	25	0.142857	37.1429
chr16	3942564	SNV	1	C	T	6	24	25	0.166667	35.3333
chr16	5456398	SNV	1	A	T	7	28	25	0.428571	35.7143
chr15	1420401	SNV	1	G	A	5	20	25	0.2	36.4
chr15	1425680	SNV	1	G	A	24	96	25	0.375	35.875
chr15	1484780	SNV	1	C	T	5	20	25	0.4	35.8
chr15	1752419	SNV	1	G	A	16	64	25	0.5	35.1875
chr12	903716	SNV	1	C	T	8	32	25	0.125	35.5
chr12	6647252	SNV	1	C	T	37	148	25	0.333333	36.2051
chr11	2367194	SNV	1	A	C	5	20	25	0	36
chr11	2367195	SNV	1	C	T	5	20	25	0	36
chr11	2367196	SNV	1	A	G	5	20	25	0	36
chr8	3067072	SNV	1	A	T	27	109	24.7706	0.448276	36.931
chr12	888801	SNV	1	A	G	24	97	24.7423	0.4	36.76
chr11	3346148	SNV	1	T	C	23	93	24.7312	0.434783	36.2174
scaffold_21	95418	SNV	1	A	G	37	150	24.6667	0.378378	37.3919
chr17	4971424	SNV	1	G	A	18	73	24.6575	0.473684	35.5263
chr15	247235	SNV	1	C	G	18	73	24.6575	0.333333	33.4444
chr7	3550067	SNV	1	G	A	16	65	24.6154	0.25	35.9375
chr6	4759062	SNV	1	A	G	16	65	24.6154	0.294118	36.3529
chr9	5442814	SNV	1	T	C	15	61	24.5902	0.235294	38.2941
chr10	4953667	SNV	1	G	A	15	61	24.5902	0.333333	33.2
chr13	685	SNV	1	A	G	14	57	24.5614	0.285714	38.1071
chr13	4231938	SNV	1	G	A	13	53	24.5283	0.285714	35.7143
chr3	6950283	SNV	1	G	C	12	49	24.4898	0.25	35.5
chr6	4755632	SNV	1	G	T	11	45	24.4444	0.454545	37.0909
chr3	6949997	SNV	1	C	T	11	45	24.4444	0.153846	34.3077
chr15	1751493	SNV	1	T	C	11	45	24.4444	0.272727	35.1818
scaffold_23	51986	SNV	1	T	A	43	176	24.4318	0.186047	36.4186
chr4	2563634	Deletion	1	C	-	10	41	24.3902	0.4	27.7
chr3	5386952	SNV	1	G	A	20	82	24.3902	0.0952381	35.9524
chr17	984998	SNV	1	C	T	10	41	24.3902	0.454545	34.5455
chr16	3428810	SNV	1	C	T	9	37	24.3243	0.4	35.1
chr14	553	SNV	1	A	G	9	37	24.3243	0.1	36.1
chr13	635	SNV	1	T	C	53	218	24.3119	0.407407	36.1296
chr15	1484545	SNV	1	C	G	26	107	24.2991	0.4375	36.1562
chr5	45837	SNV	1	T	C	17	70	24.2857	0.411765	36.6471
scaffold_23	22900	SNV	1	C	A	8	33	24.2424	0.222222	36
chr6	6862387	SNV	1	T	C	8	33	24.2424	0.375	36.875
chr6	6862389	SNV	1	G	T	8	33	24.2424	0.375	36.875
chr4	212875	SNV	1	G	A	8	33	24.2424	0.25	37.5
chr8	3112241	SNV	1	A	C	46	190	24.2105	0.333333	35.9608
chr2	8740566	SNV	1	A	C	23	95	24.2105	0.347826	37.1739
chr15	1636502	SNV	1	G	T	37	153	24.183	0.432432	35.6216
scaffold_29	34726	SNV	1	A	G	14	58	24.1379	0.0714286	36.7857
scaffold_25	68438	Insertion	1	-	T	7	29	24.1379	0.142857	35.4286
scaffold_22	122438	SNV	1	T	C	14	58	24.1379	0.470588	37.7059
chr17	6362383	SNV	1	A	C	7	29	24.1379	0.142857	34
chr16	3264038	SNV	1	A	C	7	29	24.1379	0.142857	37.2857
chr12	888708	SNV	1	C	T	14	58	24.1379	0.142857	35.0714
chr10	6573061	SNV	1	A	G	14	58	24.1379	0.5	37.7857
scaffold_38	333	SNV	1	C	T	27	112	24.1071	0.296296	34.3519
scaffold_38	334	SNV	1	C	T	27	112	24.1071	0.296296	34.3519
chr7	3550250	SNV	1	C	G	45	187	24.0642	0.413043	35.5652
chr12	6647082	SNV	1	T	G	51	212	24.0566	0.425926	35.537
chr8	3068775	SNV	1	G	A	12	50	24	0.461538	35.3077
chr3	7139711	SNV	1	G	T	6	25	24	0.166667	39.3333
chr15	1409702	SNV	1	G	A	12	50	24	0.384615	34.2308
chr15	1752440	SNV	1	G	C	18	75	24	0.388889	35.2222
chr12	902100	SNV	1	G	A	6	25	24	0	37
chr10	4051680	SNV	1	A	G	6	25	24	0	38.0833
chr10	4051681	SNV	1	A	G	6	25	24	0	38.0833
chr10	6573030	SNV	1	C	T	18	75	24	0.277778	34.5
chr1	6536021	SNV	1	C	G	6	25	24	0	37.3333
chr1	7184502	SNV	1	T	A	6	25	24	0.166667	35.8333
scaffold_22	122560	SNV	1	A	T	53	221	23.9819	0.0377358	35.1887
chr8	3070252	SNV	1	G	A	62	259	23.9382	0.421875	34.375
scaffold_39	22163	SNV	1	C	T	192	804	23.8806	0.078125	34.776
scaffold_39	22164	SNV	1	C	T	192	804	23.8806	0.078125	34.776
scaffold_27	37791	Deletion	6	TTTTTT	-	5	21	23.8095	0	35.8
chr8	3192968	SNV	1	T	G	5	21	23.8095	0	38.6
chr6	4567964	SNV	1	G	A	5	21	23.8095	0.166667	36.5
chr6	8634464	SNV	1	T	C	20	84	23.8095	0.4	36.5
chr4	2563636	Deletion	1	C	-	10	42	23.8095	0.4	27.4
chr3	5701095	Insertion	2	-	TG	5	21	23.8095	0.4	36.5
chr2	9066891	SNV	1	T	G	5	21	23.8095	0.2	33
chr17	4975001	SNV	1	A	C	5	21	23.8095	0	38.4
chr16	3281605	SNV	1	G	C	5	21	23.8095	0.166667	35.5
chr16	3281620	SNV	1	T	G	5	21	23.8095	0	36
chr15	1423053	SNV	1	G	A	5	21	23.8095	0.2	36.4
chr15	1423602	SNV	1	A	G	10	42	23.8095	0.1	36.3
chr1	5867775	SNV	1	T	A	5	21	23.8095	0.4	36.4
chr15	1636807	SNV	1	C	T	29	122	23.7705	0.333333	36.8333
chr2	8310260	Deletion	4	TAAA	-	19	80	23.75	0.421053	31.1579
chr5	2436624	SNV	1	C	T	9	38	23.6842	0	35.7778
chr2	7999938	SNV	1	C	T	9	38	23.6842	0	38.8889
chr2	8316432	SNV	1	G	T	9	38	23.6842	0.444444	35
chr9	7446529	SNV	1	T	C	22	93	23.6559	0.454545	35.6818
chr12	888893	SNV	1	G	A	22	93	23.6559	0.409091	35.9091
scaffold_21	134138	SNV	1	C	T	13	55	23.6364	0.230769	36.7692
chr2	9084729	SNV	1	C	G	41	174	23.5632	0.195122	36.8293
scaffold_22	88209	SNV	1	G	A	8	34	23.5294	0.25	36
chr8	3161875	Insertion	3	-	GAT	12	51	23.5294	0.166667	36.4167
chr6	3506587	SNV	1	G	A	8	34	23.5294	0.111111	36.7778
chr17	981241	SNV	1	G	A	12	51	23.5294	0.25	33.4167
chr15	1412753	SNV	1	C	T	12	51	23.5294	0.25	35.6667
chr3	6949986	SNV	1	C	T	15	64	23.4375	0.125	34.625
scaffold_22	98832	Deletion	1	A	-	11	47	23.4043	0.272727	27.4545
scaffold_22	122203	SNV	1	A	C	11	47	23.4043	0.357143	36.5714
chr9	322673	SNV	1	T	C	11	47	23.4043	0.272727	36.1818
chr9	326543	SNV	1	C	T	11	47	23.4043	0.181818	36.6364
chr2	8196206	SNV	1	G	T	22	94	23.4043	0.318182	35.2727
chr12	6762226	SNV	1	C	T	11	47	23.4043	0.181818	36.2727
chr16	3951906	SNV	1	A	T	18	77	23.3766	0.210526	36.9474
chr9	323545	SNV	1	T	C	7	30	23.3333	0.5	36
chr14	2114777	SNV	1	G	A	7	30	23.3333	0	35.2857
chr12	6558304	SNV	1	G	T	7	30	23.3333	0.142857	36
chr9	2355752	SNV	1	A	T	52	223	23.3184	0.320755	35.717
chr12	6570206	SNV	1	G	A	10	43	23.2558	0.4	36.1
scaffold_21	98643	SNV	1	A	C	13	56	23.2143	0	37.2308
chr9	317349	SNV	1	C	T	16	69	23.1884	0.411765	36.2941
chr15	1484560	SNV	1	C	T	25	108	23.1481	0.4375	36.5312
scaffold_22	122477	SNV	1	T	C	9	39	23.0769	0.111111	33.2222
chr9	2355873	SNV	1	T	C	54	234	23.0769	0.418182	36.7273
chr8	4167839	SNV	1	G	A	6	26	23.0769	0.333333	36.3333
chr5	2394948	SNV	1	T	C	9	39	23.0769	0.444444	35.5556
chr3	6950231	SNV	1	G	A	6	26	23.0769	0.5	37.5
chr3	6950276	SNV	1	C	T	6	26	23.0769	0.428571	36.4286
chr16	3264055	SNV	1	A	G	6	26	23.0769	0.166667	37.5
chr15	1409697	SNV	1	T	C	12	52	23.0769	0.384615	35.0769
chr15	1419412	SNV	1	G	A	6	26	23.0769	0.333333	36.1667
chr14	2114780	SNV	1	C	T	6	26	23.0769	0	37.3333
chr12	6641907	SNV	1	C	G	12	52	23.0769	0.333333	36.5833
chr10	3540730	Deletion	1	T	-	6	26	23.0769	0.5	32.5
chr8	44759	SNV	1	G	C	576	2500	23.04	0.409917	35.9306
chr6	4703916	SNV	1	G	T	17	74	22.973	0.117647	37.1176
chr8	44806	SNV	1	T	C	591	2573	22.9693	0.486134	36.6166
chr2	1651513	SNV	1	A	G	14	61	22.9508	0.428571	36
chr12	9002738	SNV	1	G	A	25	109	22.9358	0.32	36.12
chr8	3161886	SNV	1	G	A	11	48	22.9167	0.272727	36.3636
chr16	3951816	SNV	1	T	C	11	48	22.9167	0.416667	36.0833
chr12	6570203	SNV	1	C	T	11	48	22.9167	0.454545	35
chr2	9006807	Insertion	3	-	CTA	8	35	22.8571	0.25	36.9167
chr15	1419405	SNV	1	C	A	8	35	22.8571	0.5	37.125
chr15	1751254	SNV	1	C	A	8	35	22.8571	0.125	34.75
chr11	3213782	Insertion	8	-	CCGAAGTG	8	35	22.8571	0	35.4531
scaffold_47	9199	SNV	1	G	T	13	57	22.807	0.307692	36.0769
scaffold_47	14258	SNV	1	C	T	13	57	22.807	0.357143	36.2143
scaffold_38	59	SNV	1	C	T	49	215	22.7907	0.5	34.7593
chr9	322219	SNV	1	C	A	18	79	22.7848	0.421053	34.5789
chr5	46233	SNV	1	T	C	18	79	22.7848	0.277778	36.3333
scaffold_39	7944	Deletion	10	TGAGCCATGC	-	5	22	22.7273	0.4	37.2
chr9	322947	Deletion	2	CC	-	10	44	22.7273	0	34.3
chr8	2279952	SNV	1	T	A	10	44	22.7273	0.5	35
chr7	1167578	Deletion	1	G	-	5	22	22.7273	0.2	32.4
chr6	4701371	SNV	1	T	G	5	22	22.7273	0	36.4
chr5	1270080	Deletion	1	G	-	5	22	22.7273	0.4	32
chr17	985001	SNV	1	G	A	10	44	22.7273	0.5	33.2
chr17	2549224	SNV	1	T	C	5	22	22.7273	0	35.4
chr16	5454868	SNV	1	C	A	5	22	22.7273	0.2	35.8
chr15	1412630	SNV	1	G	A	25	110	22.7273	0.48	35.36
chr3	6950063	SNV	1	G	A	17	75	22.6667	0.444444	34.7222
chr9	321805	SNV	1	C	T	19	84	22.619	0.421053	35.3158
chr9	317937	SNV	1	T	C	7	31	22.5806	0.428571	35.7143
chr9	324923	SNV	1	A	C	7	31	22.5806	0	37.1429
chr4	974208	SNV	1	G	A	7	31	22.5806	0.285714	36.1429
chr4	4090965	Insertion	1	-	A	7	31	22.5806	0.285714	32.8571
chr16	4902071	SNV	1	C	T	21	93	22.5806	0.190476	34.5238
chr15	1423582	SNV	1	G	T	7	31	22.5806	0	35.4286
chr13	4351689	SNV	1	C	T	7	31	22.5806	0	36.8571
chr13	4351690	SNV	1	A	G	7	31	22.5806	0	36.8571
chr11	3730234	SNV	1	T	G	7	31	22.5806	0.428571	36.1429
chr10	6573194	SNV	1	G	A	14	62	22.5806	0.428571	34.7857
chr15	1636816	SNV	1	A	G	34	151	22.5166	0.411765	36.7353
chr7	3549353	SNV	1	A	G	18	80	22.5	0.0555556	36.1111
chr7	3549354	SNV	1	A	C	18	80	22.5	0.0555556	36.1111
chr10	4954521	SNV	1	C	T	9	40	22.5	0	38.7778
chr11	2273841	SNV	1	C	T	1701	7562	22.494	0.422599	34.7887
chr15	1483726	SNV	1	G	T	11	49	22.449	0.363636	37.2727
chr15	1484550	SNV	1	C	A	24	107	22.4299	0.451613	36.5484
chr12	6647176	SNV	1	G	A	24	107	22.4299	0.0833333	34.7917
chr17	4971746	SNV	1	C	T	13	58	22.4138	0.5	35.5714
chr4	821470	SNV	1	T	C	30	134	22.3881	0.2	35.1667
chr8	3070446	SNV	1	C	A	36	161	22.3602	0.447368	36.4474
scaffold_22	122645	SNV	1	C	T	19	85	22.3529	0.105263	36.3158
chr8	3069431	SNV	1	C	A	43	193	22.2798	0.23913	35.913
scaffold_38	23714	SNV	1	T	C	6	27	22.2222	0.333333	37.8333
scaffold_30	48275	SNV	1	T	C	12	54	22.2222	0.25	36.6667
scaffold_22	98839	SNV	1	A	C	10	45	22.2222	0.181818	32.2727
scaffold_22	122151	Deletion	2	CT	-	8	36	22.2222	0.375	31.5
chr9	318947	SNV	1	G	A	12	54	22.2222	0.25	35.1667
chr5	27781	SNV	1	C	T	6	27	22.2222	0.166667	36.3333
chr5	1616833	SNV	1	C	T	6	27	22.2222	0.166667	34
chr4	475778	SNV	1	T	C	6	27	22.2222	0.166667	34.3333
chr3	3526316	SNV	1	T	C	6	27	22.2222	0.333333	35.5
chr2	2569	SNV	1	T	A	20	90	22.2222	0.35	36.2
chr2	1651520	SNV	1	T	C	12	54	22.2222	0.5	35
chr2	8748166	SNV	1	A	G	6	27	22.2222	0	37.8333
chr2	9005554	SNV	1	C	T	46	207	22.2222	0.490196	37.2157
chr17	978754	Deletion	1	T	-	8	36	22.2222	0.25	36.25
chr17	978767	SNV	1	C	T	8	36	22.2222	0.125	37.375
chr17	984948	SNV	1	C	T	12	54	22.2222	0.5	37.75
chr15	1487337	SNV	1	A	G	10	45	22.2222	0.5	37.4
chr15	1751341	SNV	1	G	A	6	27	22.2222	0.166667	37.3333
chr12	9002732	SNV	1	T	C	24	108	22.2222	0.375	37.6667
chr11	2367205	SNV	1	C	G	8	36	22.2222	0	35.625
chr3	6951563	SNV	1	G	A	46	208	22.1154	0.22	36.64
scaffold_38	24029	SNV	1	A	C	34	154	22.0779	0.114286	36.3143
chr11	2372292	SNV	1	C	G	28	127	22.0472	0	37.7143
chr15	1485199	SNV	1	G	A	9	41	21.9512	0.111111	35.4444
chr16	3951910	SNV	1	G	C	16	73	21.9178	0.1875	36.0625
chr11	430135	SNV	1	T	C	16	73	21.9178	0.111111	37.2778
scaffold_38	508	Deletion	1	C	-	39	178	21.9101	0.282051	26.7692
scaffold_44	1220	SNV	1	C	A	7	32	21.875	0.375	36.125
chr9	5456515	SNV	1	T	C	7	32	21.875	0.285714	37
chr7	4986480	SNV	1	G	T	7	32	21.875	0.375	37.375
chr5	2395380	Deletion	1	C	-	7	32	21.875	0.285714	29.1429
chr2	9005622	SNV	1	A	C	21	96	21.875	0.333333	36.0476
chr16	6098404	Insertion	8	-	GAGCAGGT	7	32	21.875	0.285714	36.9286
chr1	953680	SNV	1	C	A	7	32	21.875	0.428571	37.2857
scaffold_25	68953	SNV	1	G	A	5	23	21.7391	0.2	35
scaffold_22	122114	SNV	1	C	A	5	23	21.7391	0.166667	38.1667
scaffold_21	142328	Insertion	10	-	TCAGAGACAG	5	23	21.7391	0	36.76
chr9	318108	SNV	1	C	A	20	92	21.7391	0.363636	36.2727
chr9	326298	SNV	1	G	C	5	23	21.7391	0	35.2
chr8	2951173	SNV	1	A	C	5	23	21.7391	0.4	36.4
chr5	1274441	SNV	1	G	A	10	46	21.7391	0.4	34.6
chr5	2416567	SNV	1	C	G	15	69	21.7391	0.444444	37.5556
chr2	8019212	SNV	1	A	G	25	115	21.7391	0.32	35.2
chr17	4970748	SNV	1	T	G	5	23	21.7391	0.2	36.8
chr16	3258631	SNV	1	G	C	5	23	21.7391	0.2	37.4
chr15	1423065	SNV	1	A	C	5	23	21.7391	0.2	35.8
chr15	1813406	SNV	1	T	C	5	23	21.7391	0.4	35.6
chr12	306921	SNV	1	C	T	5	23	21.7391	0.2	37
chr10	3622560	SNV	1	T	C	5	23	21.7391	0.2	32.8
chr10	4050728	SNV	1	C	T	15	69	21.7391	0.333333	38.8667
chr10	4050739	SNV	1	G	A	15	69	21.7391	0.333333	39.4
scaffold_39	22196	SNV	1	C	A	101	465	21.7204	0.277228	36.9307
chr3	6950365	SNV	1	C	T	38	175	21.7143	0.275	33.3
chr9	319612	SNV	1	A	T	18	83	21.6867	0.111111	36.7222
chr9	1493851	SNV	1	C	T	13	60	21.6667	0	38.3077
chr4	821957	SNV	1	G	C	8	37	21.6216	0.375	35.875
chr3	6950805	SNV	1	C	G	8	37	21.6216	0.454545	34.9091
chr3	4754	Deletion	1	C	-	11	51	21.5686	0.363636	29.9091
chr2	8536607	SNV	1	C	T	11	51	21.5686	0.0909091	38.9091
chr7	3550091	SNV	1	A	G	17	79	21.519	0.277778	35.5556
chr15	1425434	SNV	1	C	G	26	121	21.4876	0.384615	36.2692
scaffold_23	30176	SNV	1	C	A	6	28	21.4286	0.333333	37.3333
chr8	1713758	SNV	1	G	C	6	28	21.4286	0	33.5
chr8	2800918	SNV	1	C	T	6	28	21.4286	0.428571	38.1429
chr7	3550145	SNV	1	T	G	21	98	21.4286	0.478261	35.5217
chr6	6852804	SNV	1	T	A	12	56	21.4286	0.461538	35.5385
chr4	1051328	SNV	1	A	G	6	28	21.4286	0.333333	36.3333
chr4	3981426	SNV	1	T	C	15	70	21.4286	0.466667	37.2667
chr17	6586756	SNV	1	T	C	6	28	21.4286	0.166667	37.3333
chr16	670309	SNV	1	T	G	9	42	21.4286	0.444444	37.4444
chr16	3258565	SNV	1	C	T	6	28	21.4286	0.333333	34.8333
chr16	5456402	SNV	1	A	C	6	28	21.4286	0.333333	36.8333
chr15	1424623	SNV	1	T	G	30	140	21.4286	0.419355	36.1935
chr14	2114768	SNV	1	G	A	6	28	21.4286	0	36.9167
chr14	2114770	SNV	1	A	G	6	28	21.4286	0	36.9167
chr14	2168355	SNV	1	T	A	9	42	21.4286	0.333333	34
chr13	4353071	SNV	1	A	G	9	42	21.4286	0.222222	33.5556
chr10	1384623	SNV	1	C	A	6	28	21.4286	0.5	36.6667
chr4	793686	SNV	1	A	C	107	500	21.4	0.426087	36.4087
chr9	325174	SNV	1	T	G	22	103	21.3592	0.363636	34.7727
chr17	4971834	SNV	1	A	G	13	61	21.3115	0.461538	36.3077
chr5	1273006	Deletion	7	ATACATC	-	10	47	21.2766	0.4	37.9
chr15	1405236	SNV	1	G	A	10	47	21.2766	0.1	34.8
chr16	3276705	SNV	1	C	T	44	207	21.256	0.333333	35.6
chr15	1636177	SNV	1	C	T	24	113	21.2389	0.375	33.7917
scaffold_44	4641	SNV	1	C	T	14	66	21.2121	0.357143	35.9643
scaffold_44	4643	SNV	1	A	T	14	66	21.2121	0.357143	35.9643
scaffold_34	29709	SNV	1	C	A	7	33	21.2121	0.428571	32.8571
chr5	3474900	SNV	1	C	T	7	33	21.2121	0	37.7143
chr4	976946	SNV	1	C	T	7	33	21.2121	0	34.2857
chr4	3831870	SNV	1	A	G	7	33	21.2121	0.142857	37.2857
chr17	1052007	SNV	1	A	T	21	99	21.2121	0.285714	36.5238
chr4	796004	SNV	1	T	C	171	807	21.1896	0.48	35.4057
chr9	325548	SNV	1	A	C	18	85	21.1765	0.388889	36.5833
chr9	325550	SNV	1	C	T	18	85	21.1765	0.388889	36.5833
chr8	3913895	Deletion	1	C	-	11	52	21.1538	0.272727	32.3636
chr4	212809	SNV	1	A	G	11	52	21.1538	0.272727	36
chr4	212811	SNV	1	G	C	11	52	21.1538	0.272727	36
chr4	212812	SNV	1	T	C	11	52	21.1538	0.272727	36
chr13	2938183	SNV	1	C	T	11	52	21.1538	0.454545	33.8182
chr15	247275	SNV	1	T	A	15	71	21.1268	0.1875	36.125
chr15	1753037	SNV	1	T	G	15	71	21.1268	0.375	34.8125
chr9	324738	SNV	1	T	G	23	109	21.1009	0.217391	35.7826
chr6	4701123	SNV	1	C	A	8	38	21.0526	0.125	35.375
chr6	6688830	SNV	1	C	G	8	38	21.0526	0.5	35.5
chr2	2704	SNV	1	T	C	12	57	21.0526	0.0833333	34.3333
chr17	984922	SNV	1	T	C	8	38	21.0526	0.375	37.75
chr16	4039413	Deletion	1	G	-	8	38	21.0526	0.125	28.75
chr15	247279	SNV	1	C	A	16	76	21.0526	0.125	35.625
chr15	1484477	SNV	1	C	T	8	38	21.0526	0.333333	36.7778
chr15	1752461	Deletion	1	C	-	16	76	21.0526	0.4375	33.8125
chr1	5869935	SNV	1	T	C	8	38	21.0526	0.25	35.25
chr4	738422	SNV	1	A	T	99	471	21.0191	0.39	36.33
chr10	3211647	SNV	1	A	C	13	62	20.9677	0.461538	36.3077
chr8	3068031	SNV	1	T	G	35	167	20.9581	0.432432	36.4054
scaffold_23	113575	SNV	1	T	C	9	43	20.9302	0	33.1111
chr6	4755638	SNV	1	G	T	9	43	20.9302	0.333333	37.3333
scaffold_30	10521	SNV	1	G	A	5	24	20.8333	0.4	36.8
scaffold_22	123823	Deletion	2	TA	-	5	24	20.8333	0.4	31.4
chr9	317161	SNV	1	T	C	15	72	20.8333	0.375	35.9375
chr9	5368118	SNV	1	A	G	5	24	20.8333	0.4	33.6
chr8	3161864	SNV	1	C	T	10	48	20.8333	0.3	37.5
chr8	3913897	SNV	1	T	C	10	48	20.8333	0.2	37.6
chr2	9067095	SNV	1	G	T	45	216	20.8333	0.489362	35.6809
chr17	6132300	SNV	1	C	A	10	48	20.8333	0.5	34.4
chr15	1409619	SNV	1	A	T	10	48	20.8333	0.2	36.2
chr15	1485155	SNV	1	A	G	5	24	20.8333	0	37
chr12	6571644	SNV	1	C	G	10	48	20.8333	0.5	34.5
chr15	1636831	SNV	1	C	G	31	149	20.8054	0.46875	35.9375
scaffold_22	122942	SNV	1	A	G	22	106	20.7547	0.130435	37.1739
chr15	1751482	SNV	1	G	T	11	53	20.7547	0.363636	35.5455
chr7	3550086	SNV	1	G	A	17	82	20.7317	0.277778	35.6667
chr15	1816559	SNV	1	G	T	17	82	20.7317	0	38.4706
chr6	1700	SNV	1	A	G	23	111	20.7207	0.304348	36.6087
chr9	319287	SNV	1	A	G	12	58	20.6897	0.5	35.5714
chr9	328780	SNV	1	C	T	12	58	20.6897	0.416667	35.8333
chr9	1550274	SNV	1	T	G	18	87	20.6897	0.111111	36.7222
chr6	490415	SNV	1	G	T	6	29	20.6897	0.333333	34.3333
chr16	3264051	SNV	1	T	G	6	29	20.6897	0.166667	37.9167
chr15	1412569	SNV	1	A	G	6	29	20.6897	0.5	34.3333
chr13	4231901	SNV	1	G	T	12	58	20.6897	0.357143	37.5714
chr1	1309959	SNV	1	G	A	6	29	20.6897	0.333333	36.5
chr1	1349725	SNV	1	A	G	6	29	20.6897	0.5	36.3333
chr9	324453	SNV	1	T	G	13	63	20.6349	0.230769	37.6923
chr10	3211663	SNV	1	C	G	13	63	20.6349	0.461538	35.3846
scaffold_38	50	SNV	1	C	G	33	160	20.625	0.333333	35.6667
chr2	8740565	SNV	1	C	T	20	97	20.6186	0.2	37.75
chr17	4287364	SNV	1	C	T	20	97	20.6186	0.45	34.35
scaffold_22	122130	Deletion	1	A	-	7	34	20.5882	0.285714	36.1429
chr9	318330	SNV	1	C	A	14	68	20.5882	0.266667	35.7333
chr7	3736484	SNV	1	C	G	7	34	20.5882	0.428571	34.5714
chr4	737904	SNV	1	G	A	7	34	20.5882	0.428571	36.4286
chr4	3980794	SNV	1	C	A	7	34	20.5882	0.428571	36.4286
chr2	9067084	SNV	1	G	A	37	180	20.5556	0.368421	34.9211
chr9	2355896	Insertion	1	-	G	60	292	20.5479	0.383333	36.3
chr9	7234184	SNV	1	A	G	15	73	20.5479	0.266667	35.8
chr7	3550399	SNV	1	T	A	23	112	20.5357	0.173913	38
chr8	3066881	SNV	1	C	G	39	190	20.5263	0.225	35.925
scaffold_34	29753	SNV	1	T	C	8	39	20.5128	0.375	35.75
scaffold_25	27676	SNV	1	C	T	8	39	20.5128	0.375	37.375
chr9	324935	SNV	1	C	A	8	39	20.5128	0	37
chr9	326564	SNV	1	A	C	8	39	20.5128	0.25	34.875
chr4	475753	SNV	1	G	C	8	39	20.5128	0	33.75
chr4	822737	SNV	1	C	A	8	39	20.5128	0.125	35.625
chr2	8316538	SNV	1	A	G	8	39	20.5128	0.375	35.1875
chr2	8316539	SNV	1	T	G	8	39	20.5128	0.375	35.1875
chr15	1424875	SNV	1	C	T	8	39	20.5128	0.5	35
scaffold_22	122649	SNV	1	C	A	18	88	20.4545	0.111111	37.7222
scaffold_21	76642	SNV	1	T	C	9	44	20.4545	0	34.7778
chr7	3549502	Deletion	3	CGG	-	9	44	20.4545	0.333333	31.1111
chr15	1909915	SNV	1	G	A	9	44	20.4545	0.333333	33.4444
chr11	2378821	SNV	1	G	A	94	460	20.4348	0.244681	33.5638
chr7	3103839	Deletion	1	T	-	19	93	20.4301	0.315789	35.8421
scaffold_22	10613	SNV	1	C	T	10	49	20.4082	0.3	35.3
chr9	322950	Deletion	2	GC	-	10	49	20.4082	0	35.2
chr14	2119389	SNV	1	C	T	10	49	20.4082	0.166667	37.8333
chr4	737882	SNV	1	C	T	11	54	20.3704	0.333333	34.75
chr15	1425726	SNV	1	T	G	11	54	20.3704	0.0909091	37.6364
chr12	6570222	Insertion	3	-	AAG	11	54	20.3704	0.363636	36.1515
chr3	8399702	SNV	1	T	C	1231	6047	20.3572	0.486122	35.8072
chr9	2355757	SNV	1	T	C	46	226	20.354	0.26087	37.4565
chr9	323863	SNV	1	G	A	14	69	20.2899	0.4	37.4667
chr12	9002484	SNV	1	A	T	14	69	20.2899	0.5	37.1429
chr12	9002489	SNV	1	T	C	14	69	20.2899	0.5	36.5714
chr9	319759	SNV	1	T	C	17	84	20.2381	0.444444	37.6111
chr8	3782275	SNV	1	G	C	17	84	20.2381	0.473684	36.4211
chr12	9024356	SNV	1	A	T	17	84	20.2381	0	37.0588
scaffold_38	23103	SNV	1	A	T	18	89	20.2247	0.166667	37.5556
chr17	2148013	SNV	1	C	T	29	144	20.1389	0.433333	36.4333
chr15	1636834	SNV	1	A	C	29	144	20.1389	0.483871	36.0645
scaffold_25	75052	SNV	1	A	T	5	25	20	0	37.4
scaffold_22	124334	SNV	1	C	A	5	25	20	0.2	36.4
chr9	318290	SNV	1	A	G	6	30	20	0.166667	35.3333
chr9	318958	SNV	1	T	A	7	35	20	0.142857	33.8571
chr9	322934	SNV	1	T	A	7	35	20	0	35.7143
chr9	323527	SNV	1	A	C	4	20	20	0.25	35.5
chr9	324926	SNV	1	C	A	6	30	20	0	38.5
chr9	325856	SNV	1	C	A	5	25	20	0.4	34.8
chr9	327415	SNV	1	T	G	4	20	20	0.5	36.5
chr9	1489995	SNV	1	A	T	5	25	20	0	36.8
chr9	5442628	SNV	1	C	T	8	40	20	0	36.875
chr9	7359586	SNV	1	T	C	24	120	20	0.5	36.1154
chr8	1392624	Deletion	1	C	-	4	20	20	0.25	34.5
chr8	2280155	SNV	1	G	A	13	65	20	0.0769231	35.0769
chr8	2731092	SNV	1	C	G	21	105	20	0.227273	34
chr8	2888347	SNV	1	G	T	4	20	20	0	36.5
chr8	3020720	SNV	1	T	G	8	40	20	0.125	36.125
chr8	3034527	SNV	1	T	C	20	100	20	0.47619	37.1905
chr7	3090169	Insertion	5	-	GAGTA	4	20	20	0.25	38.5
chr7	3106562	SNV	1	C	T	4	20	20	0	38.5
chr7	3550074	SNV	1	C	T	14	70	20	0.5	36.2857
chr7	3550076	SNV	1	G	A	14	70	20	0.5	36.2857
chr6	1676	Insertion	1	-	T	34	170	20	0.382353	33.6471
chr6	4562231	SNV	1	G	T	16	80	20	0.125	35.9375
chr6	4822520	Deletion	1	G	-	4	20	20	0.25	20.25
chr6	6862083	SNV	1	A	G	5	25	20	0.4	33.6
chr6	6862267	SNV	1	G	T	7	35	20	0.285714	35.9286
chr5	1274287	SNV	1	C	A	6	30	20	0.333333	34.6667
chr4	936236	SNV	1	G	A	6	30	20	0.375	34
chr4	3980799	SNV	1	T	C	6	30	20	0.5	37.1667
chr3	6131417	SNV	1	A	G	4	20	20	0.5	37.75
chr3	6934507	SNV	1	A	G	12	60	20	0.5	35.8571
chr2	8234983	SNV	1	A	G	11	55	20	0.363636	35.6364
chr2	8642385	SNV	1	A	G	8	40	20	0.375	37.5
chr2	9080147	SNV	1	A	T	4	20	20	0.25	34.5
chr2	9081779	SNV	1	A	T	12	60	20	0	36.9167
chr2	9085477	SNV	1	A	G	9	45	20	0.222222	35.1111
chr17	965149	SNV	1	A	G	6	30	20	0	36.6667
chr17	969849	SNV	1	C	T	5	25	20	0.4	38.4
chr17	981389	SNV	1	G	A	6	30	20	0.166667	37
chr17	981391	SNV	1	C	T	6	30	20	0.166667	37
chr17	6366865	SNV	1	C	T	4	20	20	0	37.5
chr16	162639	SNV	1	T	G	17	85	20	0.411765	36.2941
chr16	665617	SNV	1	G	T	4	20	20	0.5	33.75
chr15	1405267	SNV	1	C	T	9	45	20	0.111111	35.8889
chr15	1424867	Deletion	1	A	-	6	30	20	0.5	37.8333
chr15	1425734	SNV	1	G	C	10	50	20	0.1	37.5
chr15	1483870	SNV	1	A	C	4	20	20	0.25	35.25
chr15	1486763	Deletion	2	CA	-	6	30	20	0	35.6667
chr15	1823595	SNV	1	C	T	7	35	20	0	37.5714
chr14	3466977	Deletion	2	AC	-	4	20	20	0.25	30
chr13	425068	SNV	1	G	A	5	25	20	0	36.8
chr12	6570149	SNV	1	C	T	5	25	20	0.4	35.2
chr12	6784985	SNV	1	T	A	6	30	20	0.428571	35.5714
chr12	9002008	SNV	1	C	T	14	70	20	0.266667	32.5333
chr11	92396	SNV	1	G	A	7	35	20	0.428571	37.2857
chr11	1877576	SNV	1	A	G	9	45	20	0	34.6667
chr11	2366423	SNV	1	C	T	4	20	20	0	38
chr10	2244199	SNV	1	A	T	11	55	20	0.272727	34.7273
chr10	3623160	SNV	1	G	A	4	20	20	0.25	37.75
chr10	4954529	SNV	1	A	G	6	30	20	0.166667	37.5
chr1	12314	SNV	1	C	T	8	40	20	0.111111	34.8889
chr1	953676	SNV	1	A	C	5	25	20	0.2	38
chr1	1349698	SNV	1	G	A	6	30	20	0.5	35.6667

## Sheet: in Genes - 1023
Mapping	Reference Position	Type	Length	Reference	Allele	Count	Coverage	Frequency	Forward/reverse balance	Average quality	Overlapping annotations	Coding region change	Amino acid change	Annotation
chr3	1880905	SNV	1	G	A	20	20	100	0.3	37	CDS: Cre03.g154950, Gene: Cre03.g154950, mRNA: Cre03.g154950	Cre03.g154950:c.148G>A	Cre03.g154950:p.Glu50Met	Glutathione S-transferase family protein
chr3	1880906	SNV	1	A	T	20	20	100	0.3	37	CDS: Cre03.g154950, Gene: Cre03.g154950, mRNA: Cre03.g154950	Cre03.g154950:c.149A>T	Cre03.g154950:p.Glu50Met
chr7	814167	SNV	1	T	C	22	22	100	0.363636	35.5455	CDS: Cre07.g318300, Gene: Cre07.g318300, mRNA: Cre07.g318300	Cre07.g318300:c.450A>G
chr12	4109309	SNV	1	T	C	23	23	100	0.347826	37.3913	CDS: g12772, Gene: g12772, mRNA: g12772	g12772:c.376A>G	g12772:p.Thr126Ala
chr2	7212684	SNV	1	T	C	22	22	100	0.391304	36.1304	CDS: g2539, Gene: g2539, mRNA: g2539	g2539:c.1319A>G	g2539:p.Asp440Gly
chr4	3534151	SNV	1	A	G	21	21	100	0.227273	36.1818	CDS: g4993, CDS: Cre04.g228208, Gene: Cre04.g228208, Gene: g4993, mRNA: Cre04.g228208, mRNA: g4993	g4993:c.[1259T>C]; Cre04.g228208:c.[1244T>C]	g4993:p.[Phe420Ser]; Cre04.g228208:p.[Phe415Ser]	ataurora3
chr2	2233023	SNV	1	A	C	23	23	100	0.37037	36.0741	Gene: Cre02.g090000, mRNA: Cre02.g090000	Cre02.g090000:c.517-50A>C
chr3	8352134	Insertion	1	-	T	22	22	100	0.5	34.5909	Gene: Cre03.g198800, Five_prime_utr: PAC:26902141.five_prime_UTR.2, mRNA: Cre03.g198800
chr3	8352136	Insertion	1	-	C	21	21	100	0.47619	36.381	Gene: Cre03.g198800, Five_prime_utr: PAC:26902141.five_prime_UTR.2, mRNA: Cre03.g198800
chr4	1734574	SNV	1	T	G	20	20	100	0.291667	35.9583	Gene: Cre04.g212400, mRNA: Cre04.g212400	Cre04.g212400:c.2629-48A>C
chr4	1963422	SNV	1	A	G	104	104	100	0.428571	35.9107	Gene: Cre04.g218500, mRNA: Cre04.g218500	Cre04.g218500:c.1275+641T>C		NAD(P)-linked oxidoreductase superfamily protein
chr4	1963440	SNV	1	T	C	101	101	100	0.40367	36.1835	Gene: Cre04.g218500, mRNA: Cre04.g218500	Cre04.g218500:c.1275+623A>G
chr4	1963462	Deletion	5	CGTAC	-	66	66	100	0.30303	34.1212	Gene: Cre04.g218500, mRNA: Cre04.g218500	Cre04.g218500:c.1275+597_1275+601delGTACG
chr5	563891	SNV	1	T	A	46	46	100	0.333333	36.1667	Gene: Cre05.g232300, mRNA: Cre05.g232300	Cre05.g232300:c.4285-164A>T
chr5	563900	SNV	1	G	C	44	44	100	0.318182	36.0114	Gene: Cre05.g232300, mRNA: Cre05.g232300	Cre05.g232300:c.4285-173C>G
chr5	563901	SNV	1	A	G	44	44	100	0.318182	36.0114	Gene: Cre05.g232300, mRNA: Cre05.g232300	Cre05.g232300:c.4285-174T>C
chr5	563919	SNV	1	G	C	30	30	100	0.419355	35.3226	Gene: Cre05.g232300, mRNA: Cre05.g232300	Cre05.g232300:c.4285-192C>G
chr5	563924	SNV	1	T	G	31	31	100	0.375	36.2188	Gene: Cre05.g232300, mRNA: Cre05.g232300	Cre05.g232300:c.4285-197A>C
chr7	3577775	SNV	1	T	C	27	27	100	0.46875	36.0938	Gene: Cre07.g336600, Gene: g7833, mRNA: Cre07.g336600, mRNA: g7833	Cre07.g336600:c.[2312-39A>G]; g7833:c.[2312-39A>G]		alpha-mannosidase 3
chr7	3577785	SNV	1	G	C	23	23	100	0.464286	36.3571	Gene: Cre07.g336600, Gene: g7833, mRNA: Cre07.g336600, mRNA: g7833	Cre07.g336600:c.[2312-49C>G]; g7833:c.[2312-49C>G]
chr7	3577791	SNV	1	G	C	20	20	100	0.461538	35.4615	Gene: Cre07.g336600, Gene: g7833, mRNA: Cre07.g336600, mRNA: g7833	Cre07.g336600:c.[2312-55C>G]; g7833:c.[2312-55C>G]
chr7	3577794	SNV	1	T	C	21	21	100	0.5	34.5769	Gene: Cre07.g336600, Gene: g7833, mRNA: Cre07.g336600, mRNA: g7833	Cre07.g336600:c.[2312-58A>G]; g7833:c.[2312-58A>G]
chr15	293958	SNV	1	T	C	23	23	100	0.347826	35.6304	Gene: Cre15.g635650, Gene: g15333, mRNA: Cre15.g635650, mRNA: g15333	Cre15.g635650:c.[4236+83T>C]; g15333:c.[4236+83T>C]		D-alanine--D-alanine ligase family
chr15	293960	SNV	1	T	C	23	23	100	0.347826	35.6304	Gene: Cre15.g635650, Gene: g15333, mRNA: Cre15.g635650, mRNA: g15333	Cre15.g635650:c.[4236+85T>C]; g15333:c.[4236+85T>C]
chr15	293966	SNV	1	G	C	26	26	100	0.172414	35.7241	Gene: Cre15.g635650, Gene: g15333, mRNA: Cre15.g635650, mRNA: g15333	Cre15.g635650:c.[4236+91G>C]; g15333:c.[4236+91G>C]
chr15	293995	SNV	1	G	T	22	22	100	0.16	36.84	Gene: Cre15.g635650, Gene: g15333, mRNA: Cre15.g635650, mRNA: g15333	Cre15.g635650:c.[4236+120G>T]; g15333:c.[4236+120G>T]
chr15	293998	SNV	1	G	T	21	21	100	0	37.1905	Gene: Cre15.g635650, Gene: g15333, mRNA: Cre15.g635650, mRNA: g15333	Cre15.g635650:c.[4236+123G>T]; g15333:c.[4236+123G>T]
chr17	4472200	SNV	1	G	A	97	97	100	0.323232	35.7475	Gene: g17698, Gene: Cre17.g732350, mRNA: g17698, mRNA: Cre17.g732350, Three_prime_utr: PAC:26896496.three_prime_UTR.1, Three_prime_utr: PAC:26896497.three_prime_UTR.1			glyoxal oxidase-related protein
chr3	4949578	SNV	1	G	A	24	24	100	0.48	37.16	Gene: g3728, mRNA: g3728	g3728:c.471-56G>A
chr3	4949595	SNV	1	G	A	26	26	100	0.481481	37.7407	Gene: g3728, mRNA: g3728	g3728:c.471-39G>A
chr8	91791	SNV	1	A	G	49	49	100	0.313725	35.451	Gene: g8346, mRNA: g8346, Three_prime_utr: PAC:26888193.three_prime_UTR.1
chr5	458201	SNV	1	C	T	130	131	99.2366	0.215385	34.0308	Gene: g5124, mRNA: g5124, mRNA: g5124	g5124:c.[1282-110C>T];[1303-110C>T]
chr5	1813179	Deletion	2	TA	-	56	57	98.2456	0.482143	32.6071	Gene: Cre05.g242150, Five_prime_utr: PAC:26897766.five_prime_UTR.1, mRNA: Cre05.g242150
chr5	1813176	SNV	1	G	T	52	53	98.1132	0.481481	36.4815	Gene: Cre05.g242150, Five_prime_utr: PAC:26897766.five_prime_UTR.1, mRNA: Cre05.g242150
chr5	458228	SNV	1	C	A	50	51	98.0392	0.4	33.12	Gene: g5124, mRNA: g5124, mRNA: g5124	g5124:c.[1282-83C>A];[1303-83C>A]
chr11	2444238	SNV	1	G	T	46	47	97.8723	0.34	35.96	CDS: Cre11.g475350, Gene: Cre11.g475350, mRNA: Cre11.g475350	Cre11.g475350:c.72G>T	Cre11.g475350:p.Lys24Asn	Cytokine-induced anti-apoptosis inhibitor 1, Fe-S biogenesis
chr10	2391336	SNV	1	C	G	35	36	97.2222	0.228571	35.7429	Gene: Cre10.g435300, Gene: g10736, mRNA: Cre10.g435300, mRNA: g10736	Cre10.g435300:c.[758+117C>G]; g10736:c.[758+117C>G]		Zn-dependent exopeptidases superfamily protein
chr3	8352128	Deletion	1	C	-	23	24	95.8333	0.434783	29.5652	Gene: Cre03.g198800, Five_prime_utr: PAC:26902141.five_prime_UTR.2, mRNA: Cre03.g198800
chr5	458187	Deletion	1	A	-	80	84	95.2381	0.4	29.8375	Gene: g5124, mRNA: g5124, mRNA: g5124	g5124:c.[1282-124delA];[1303-124delA]
chr4	3864785	Deletion	1	G	-	19	20	95	0.315789	28.3158	Gene: g5040, mRNA: g5040	g5040:c.283+34delG
chr1	6066544	SNV	1	A	C	665	710	93.662	0.0644678	32.2969	Gene: Cre01.g043200, mRNA: Cre01.g043200	Cre01.g043200:c.207-195T>G
chr1	6066551	SNV	1	T	G	749	801	93.5081	0.0466045	32.6152	Gene: Cre01.g043200, mRNA: Cre01.g043200	Cre01.g043200:c.207-202A>C
chr4	530837	Insertion	1	-	G	24	26	92.3077	0.125	34.875	Gene: g4566, mRNA: g4566	g4566:c.5631-191_5631-190insG		ARM repeat superfamily protein
chr7	4593015	SNV	1	G	A	95	110	86.3636	0.231579	34.4421	Gene: Cre07.g344100, Gene: g8005, mRNA: Cre07.g344100, mRNA: g8005, mRNA: g8005	Cre07.g344100:c.[4377+126C>T]; g8005:c.[4380+126C>T];[4455+126C>T]		protein arginine methyltransferase 7
chr4	3660915	SNV	1	C	T	25	29	86.2069	0.24	36.36	CDS: Cre04.g228850, Gene: Cre04.g228850, mRNA: Cre04.g228850	Cre04.g228850:c.1743C>T		mitogen-activated protein kinase kinase kinase 3
chr8	2301674	Insertion	2	-	CA	30	35	85.7143	0.0666667	36.3167	Gene: Cre08.g370250, Gene: g8677, mRNA: Cre08.g370250, mRNA: g8677	Cre08.g370250:c.[152+31_152+32insTG]; g8677:c.[152+31_152+32insTG]
chr4	3660891	SNV	1	A	C	23	27	85.1852	0.217391	35.7391	CDS: Cre04.g228850, Gene: Cre04.g228850, mRNA: Cre04.g228850	Cre04.g228850:c.1719A>C
chr4	2334315	SNV	1	T	C	19	23	82.6087	0.421053	35.5263	CDS: Cre04.g220750, Gene: Cre04.g220750, mRNA: Cre04.g220750	Cre04.g220750:c.558A>G
chr4	3660923	SNV	1	T	C	22	27	81.4815	0.272727	36.2727	CDS: Cre04.g228850, Gene: Cre04.g228850, mRNA: Cre04.g228850	Cre04.g228850:c.1751T>C	Cre04.g228850:p.Val584Ala
chr8	3253419	Deletion	1	C	-	17	21	80.9524	0.176471	35.9412	Gene: g8806, mRNA: g8806, mRNA: g8806	g8806:c.[8524-70delC];[8524-70delC]
chr4	3660942	SNV	1	C	T	20	25	80	0.3	36.35	CDS: Cre04.g228850, Gene: Cre04.g228850, mRNA: Cre04.g228850	Cre04.g228850:c.1770C>T
chr6	8766168	Insertion	1	-	A	42	53	79.2453	0.357143	37.0238	Gene: Cre06.g309950, mRNA: Cre06.g309950	Cre06.g309950:c.13419-23_13419-22insT
chr4	355042	SNV	1	T	C	18	23	78.2609	0.263158	37.2105	Gene: g4542, mRNA: g4542	g4542:c.819-440A>G
chr13	673929	Deletion	6	ATGTTG	-	24	31	77.4194	0.125	36.6667	Gene: g13935, mRNA: g13935	g13935:c.1627-44_1627-39delATGTTG		methyltransferases
chr6	2220900	SNV	1	A	C	31	41	75.6098	0.0625	36.9062	Gene: g5977, mRNA: g5977
chr4	2334302	SNV	1	T	C	18	24	75	0.333333	36.9444	CDS: Cre04.g220750, Gene: Cre04.g220750, mRNA: Cre04.g220750	Cre04.g220750:c.571A>G	Cre04.g220750:p.Met191Val
chr4	3618428	Insertion	1	-	G	15	20	75	0.133333	35.8667	Gene: Cre04.g228650, mRNA: Cre04.g228650	Cre04.g228650:c.4063-8_4063-7insC		multidrug resistance-associated protein 2
chr4	2334347	SNV	1	T	C	16	22	72.7273	0.235294	35.7647	CDS: Cre04.g220750, Gene: Cre04.g220750, mRNA: Cre04.g220750	Cre04.g220750:c.526A>G	Cre04.g220750:p.Thr176Ala
chr14	1682443	Insertion	1	-	T	15	21	71.4286	0	37.9333	Gene: g14924, mRNA: g14924	g14924:c.396-404_396-403insA		cyclophilin 5
chr6	5306397	Deletion	1	C	-	29	41	70.7317	0.413793	23.6207	Gene: Cre06.g283000, mRNA: Cre06.g283000	Cre06.g283000:c.1417-47delC
chr11	1642432	Insertion	8	-	AATTGACT	35	51	68.6275	0.371429	36.6571	Gene: g11700, Five_prime_utr: PAC:26890557.five_prime_UTR.1, mRNA: g11700			Phosphoglycerate kinase family protein
chr4	3618435	Insertion	1	-	G	17	25	68	0.235294	36.1765	Gene: Cre04.g228650, mRNA: Cre04.g228650	Cre04.g228650:c.4063-15_4063-14insC
chr9	6844023	SNV	1	C	T	23	34	67.6471	0.391304	32.4783	Gene: Cre09.g409800, mRNA: Cre09.g409800	Cre09.g409800:c.942+65G>A		HD domain-containing metal-dependent phosphohydrolase family protein
chr4	705172	SNV	1	A	G	99	147	67.3469	0.363636	35.1919	Gene: g4585, mRNA: g4585, Three_prime_utr: PAC:26906169.three_prime_UTR.1			autoinhibited Ca(2+)-ATPase 10
chr4	705174	SNV	1	A	G	99	147	67.3469	0.363636	35.1919	Gene: g4585, mRNA: g4585, Three_prime_utr: PAC:26906169.three_prime_UTR.1
chr4	2334297	SNV	1	C	T	14	21	66.6667	0.214286	37	CDS: Cre04.g220750, Gene: Cre04.g220750, mRNA: Cre04.g220750	Cre04.g220750:c.576G>A
chr4	2333398	SNV	1	C	T	14	21	66.6667	0.357143	36.8571	CDS: Cre04.g220750, Gene: Cre04.g220750, mRNA: Cre04.g220750	Cre04.g220750:c.1475G>A	Cre04.g220750:p.Ser492Asn
chr17	4428564	Insertion	8	-	ATTCGGTG	20	30	66.6667	0.25	37.025	Gene: Cre17.g731800, mRNA: Cre17.g731800	Cre17.g731800:c.70+84_70+85insCACCGAAT
chr6	2220874	SNV	1	T	A	18	27	66.6667	0	36.7222	Gene: g5977, mRNA: g5977
chr6	2220880	SNV	1	G	A	21	32	65.625	0	36.619	Gene: g5977, mRNA: g5977
chr4	705178	SNV	1	T	G	103	160	64.375	0.417476	34.4272	Gene: g4585, mRNA: g4585, Three_prime_utr: PAC:26906169.three_prime_UTR.1
chr7	5799075	Insertion	7	-	CCGGTGG	16	25	64	0.5	35.8571	Gene: Cre07.g353200, mRNA: Cre07.g353200, Three_prime_utr: PAC:26888916.three_prime_UTR.1			GTP-binding protein, HflX
chr9	6714523	Insertion	2	-	AC	23	36	63.8889	0.217391	36.4565	Gene: Cre09.g408900, mRNA: Cre09.g408900	Cre09.g408900:c.1423-85_1423-84insGT
chr17	762224	Insertion	8	-	TTCCTGCA	31	49	63.2653	0.387097	35.8911	CDS: Cre17.g701450, Gene: Cre17.g701450, mRNA: Cre17.g701450	Cre17.g701450:c.35_36insTTCCTGCA	Cre17.g701450:p.His12fs
chr6	5306410	Deletion	1	A	-	29	46	63.0435	0.413793	25.8966	Gene: Cre06.g283000, mRNA: Cre06.g283000	Cre06.g283000:c.1417-34delA
chr2	6565379	Insertion	8	-	CGGCGAGT	25	40	62.5	0.36	35.415	Gene: Cre02.g117050, Gene: g2423, Five_prime_utr: PAC:26900032.five_prime_UTR.1, Five_prime_utr: PAC:26900030.five_prime_UTR.1, Five_prime_utr: PAC:26900031.five_prime_UTR.1, mRNA: Cre02.g117050, mRNA: g2423, mRNA: g2423			Protein kinase superfamily protein
chr4	3645840	Insertion	8	-	ACCTATAG	15	24	62.5	0	35.85	Gene: Cre04.g228750, mRNA: Cre04.g228750	Cre04.g228750:c.201+30_201+31insACCTATAG
chr4	705184	Deletion	1	T	-	80	129	62.0155	0.325	32.8625	Gene: g4585, mRNA: g4585, Three_prime_utr: PAC:26906169.three_prime_UTR.1
chr2	8061697	SNV	1	C	T	21	34	61.7647	0.416667	38.0833	Gene: g2687, Gene: g2688, mRNA: g2687, mRNA: g2687, mRNA: g2687, mRNA: g2688, mRNA: g2688	g2687:c.[26+34G>A];[26+34G>A];[26+34G>A]
chr3	8352143	SNV	1	C	A	29	47	61.7021	0.482759	35.7759	Gene: Cre03.g198800, Five_prime_utr: PAC:26902141.five_prime_UTR.2, mRNA: Cre03.g198800
chr3	8352144	SNV	1	C	T	29	47	61.7021	0.482759	35.7759	Gene: Cre03.g198800, Five_prime_utr: PAC:26902141.five_prime_UTR.2, mRNA: Cre03.g198800
chr13	2988647	Insertion	1	-	T	103	167	61.6766	0.446602	33.7184	Gene: Cre13.g584170, mRNA: Cre13.g584170, Three_prime_utr: PAC:26898556.three_prime_UTR.1
chr8	4750579	SNV	1	A	T	14	23	60.8696	0.285714	37.5	Gene: g9044, mRNA: g9044, mRNA: g9044
chr6	2220949	SNV	1	A	G	45	74	60.8108	0.106383	36.5319	Gene: g5977, mRNA: g5977
chr6	2221005	SNV	1	A	C	46	76	60.5263	0.3125	34.6667	Gene: g5977, mRNA: g5977
chr4	2333893	SNV	1	T	C	15	25	60	0.294118	35.5882	CDS: Cre04.g220750, Gene: Cre04.g220750, mRNA: Cre04.g220750	Cre04.g220750:c.980A>G	Cre04.g220750:p.Lys327Arg
chr12	1000178	Deletion	1	A	-	12	20	60	0.166667	31.25	Gene: g12153, mRNA: g12153	g12153:c.4032+40delT		phosphate transporter 2;1
chr8	4750576	SNV	1	A	G	16	27	59.2593	0.25	37.5	Gene: g9044, mRNA: g9044, mRNA: g9044
chr6	2221112	SNV	1	G	A	17	29	58.6207	0.176471	34.2353	Gene: g5977, mRNA: g5977
chr6	1383670	Insertion	8	-	TATGAGCT	24	41	58.5366	0	37.2135	Gene: Cre06.g258800, mRNA: Cre06.g258800	Cre06.g258800:c.9+7_9+8insTATGAGCT
chr2	1681372	Insertion	8	-	ATTAAAAC	29	50	58	0.206897	36.1164	Gene: Cre02.g085800, mRNA: Cre02.g085800, Three_prime_utr: PAC:26899892.three_prime_UTR.1
chr6	7880325	SNV	1	C	T	109	188	57.9787	0.472727	34.5818	Gene: Cre06.g303171, mRNA: Cre06.g303171, Three_prime_utr: PAC:26893592.three_prime_UTR.1
chr15	492624	SNV	1	A	C	15	26	57.6923	0.470588	35.8235	Gene: g15357, mRNA: g15357	g15357:c.1614+69T>G
chr17	3590789	Insertion	8	-	TGATACAT	29	51	56.8627	0.344828	36.4009	Gene: g17553, mRNA: g17553, Three_prime_utr: PAC:26896681.three_prime_UTR.1
chr10	681284	Insertion	8	-	ACTCTGTC	17	30	56.6667	0.470588	36.5882	Gene: g10448, mRNA: g10448	g10448:c.68-157_68-156insACTCTGTC
chr15	492595	SNV	1	A	G	13	23	56.5217	0.5	35.6429	Gene: g15357, mRNA: g15357	g15357:c.1614+98T>C
chr17	4821089	Deletion	1	C	-	14	25	56	0.214286	31.2143	Gene: Cre17.g733950, mRNA: Cre17.g733950	Cre17.g733950:c.1030+34delG
chr3	968671	Insertion	8	-	TGAGCAGG	33	59	55.9322	0.333333	35.2689	Gene: Cre03.g148000, Five_prime_utr: PAC:26901430.five_prime_UTR.1, mRNA: Cre03.g148000
chr4	2334439	SNV	1	G	T	19	34	55.8824	0.1	36.55	CDS: Cre04.g220750, Gene: Cre04.g220750, mRNA: Cre04.g220750	Cre04.g220750:c.434C>A	Cre04.g220750:p.Thr145Asn
chr9	6844045	SNV	1	C	T	19	34	55.8824	0.315789	33.8947	Gene: Cre09.g409800, mRNA: Cre09.g409800	Cre09.g409800:c.942+43G>A
chr15	111489	SNV	1	T	C	11	20	55	0.454545	35.7273	Gene: g15310, mRNA: g15310, Three_prime_utr: PAC:26898246.three_prime_UTR.1
scaffold_22	1779	SNV	1	G	A	34	62	54.8387	0.297297	35.1351	CDS: g18199, Gene: g18199, mRNA: g18199	g18199:c.66C>T
chr11	3613433	Insertion	8	-	GTCGAACC	40	73	54.7945	0.45	35.7406	Gene: Cre11.g482050, mRNA: Cre11.g482050, Three_prime_utr: PAC:26890355.three_prime_UTR.1			DGCR14-related
scaffold_22	31880	Deletion	2	AG	-	27	50	54	0	33.9259	Gene: g18206, mRNA: g18206, mRNA: g18206, Three_prime_utr: PAC:26892849.three_prime_UTR.1, Three_prime_utr: PAC:26892850.three_prime_UTR.1
chr10	4921537	SNV	1	A	G	36	67	53.7313	0.444444	32.9444	CDS: Cre10.g454900, Gene: Cre10.g454900, mRNA: Cre10.g454900	Cre10.g454900:c.488A>G	Cre10.g454900:p.Glu163Gly
chr14	200755	SNV	1	T	A	15	28	53.5714	0.277778	35.1667	Gene: g14683, mRNA: g14683	g14683:c.520-190A>T		Nitrilase/cyanide hydratase and apolipoprotein N-acyltransferase family protein
chr12	911355	Deletion	7	AACAACA	-	23	43	53.4884	0	34.913	Gene: g12149, mRNA: g12149	g12149:c.3172+1190_3172+1196delTGTTGTT
chr9	4440434	Insertion	8	-	GACGCGAG	33	62	53.2258	0.363636	35.8788	Gene: g9813, Five_prime_utr: PAC:26895092.five_prime_UTR.1, mRNA: g9813
chr10	4921549	SNV	1	A	G	35	66	53.0303	0.342857	33.8286	CDS: Cre10.g454900, Gene: Cre10.g454900, mRNA: Cre10.g454900	Cre10.g454900:c.500A>G	Cre10.g454900:p.Glu167Gly
chr11	420277	Deletion	1	C	-	11	21	52.381	0.181818	31	CDS: g11514, Gene: g11514, mRNA: g11514	g11514:c.327delC	g11514:p.Pro109fs	protein kinase family protein / protein phosphatase 2C ( PP2C) family protein
chr16	1416053	SNV	1	C	A	11	21	52.381	0.0909091	35.7273	Gene: Cre16.g652300, mRNA: Cre16.g652300	Cre16.g652300:c.178+395C>A
chr11	442577	SNV	1	A	G	22	42	52.381	0.363636	36.4091	Gene: g11518, mRNA: g11518, Three_prime_utr: PAC:26890138.three_prime_UTR.1			protein kinase family protein / protein phosphatase 2C ( PP2C) family protein
chr4	2333814	SNV	1	G	A	12	23	52.1739	0.307692	37.1538	CDS: Cre04.g220750, Gene: Cre04.g220750, mRNA: Cre04.g220750	Cre04.g220750:c.1059C>T
chr7	4461868	Insertion	8	-	TCAGCATG	39	75	52	0.410256	36.8141	Gene: Cre07.g343300, Five_prime_utr: PAC:26888923.five_prime_UTR.1, mRNA: Cre07.g343300
chr17	974802	SNV	1	G	T	14	27	51.8519	0.4	36.0667	CDS: Cre17.g703100, Gene: Cre17.g703100, mRNA: Cre17.g703100	Cre17.g703100:c.393G>T
chr6	1188899	SNV	1	A	C	14	27	51.8519	0.214286	35.5714	Gene: Cre06.g257500, Five_prime_utr: PAC:26893029.five_prime_UTR.1, mRNA: Cre06.g257500			general regulatory factor 7
chr6	7880332	SNV	1	G	A	86	166	51.8072	0.494253	33.7701	Gene: Cre06.g303171, mRNA: Cre06.g303171, Three_prime_utr: PAC:26893592.three_prime_UTR.1
chr1	4569180	Deletion	1	C	-	16	31	51.6129	0.375	32.0625	Gene: Cre01.g031250, mRNA: Cre01.g031250, Three_prime_utr: PAC:26903205.three_prime_UTR.1			Protein of unknown function (DUF1279)
chr7	4593066	SNV	1	G	T	19	37	51.3514	0.263158	33.0526	Gene: Cre07.g344100, Gene: g8005, mRNA: Cre07.g344100, mRNA: g8005, mRNA: g8005	Cre07.g344100:c.[4377+75C>A]; g8005:c.[4380+75C>A];[4455+75C>A]
chr3	8415422	SNV	1	G	A	96	189	50.7937	0.1875	34.8854	Gene: g4359, Five_prime_utr: PAC:26902533.five_prime_UTR.1, mRNA: g4359
chr4	2333543	SNV	1	G	A	11	22	50	0.181818	36.2727	CDS: Cre04.g220750, Gene: Cre04.g220750, mRNA: Cre04.g220750	Cre04.g220750:c.1330C>T
chr4	2333559	SNV	1	G	C	11	22	50	0.181818	36.2727	CDS: Cre04.g220750, Gene: Cre04.g220750, mRNA: Cre04.g220750	Cre04.g220750:c.1314C>G
chr13	2348220	SNV	1	C	A	20	40	50	0.15	36.275	CDS: Cre13.g579300, Gene: Cre13.g579300, mRNA: Cre13.g579300	Cre13.g579300:c.152G>T	Cre13.g579300:p.Arg51Leu
chr13	2348221	SNV	1	T	G	20	40	50	0.15	36.275	CDS: Cre13.g579300, Gene: Cre13.g579300, mRNA: Cre13.g579300	Cre13.g579300:c.151A>C	Cre13.g579300:p.Arg51Leu
chr16	3002067	SNV	1	T	C	15	30	50	0.2	35.8	Gene: Cre16.g664600, Five_prime_utr: PAC:26892177.five_prime_UTR.1, mRNA: Cre16.g664600			GRIM-19 protein
chr12	679898	SNV	1	T	C	13	26	50	0.0769231	36.2308	Gene: g12114, mRNA: g12114			phosphate transporter 2;1
chr12	1000168	SNV	1	T	C	12	24	50	0.166667	35.1667	Gene: g12153, mRNA: g12153	g12153:c.4032+50A>G
chr6	4397187	Deletion	10	GAGAAGAAAA	-	10	20	50	0.4	34.5	Gene: g6416, mRNA: g6416, Three_prime_utr: PAC:26893482.three_prime_UTR.1
chr9	2228546	SNV	1	G	A	35	71	49.2958	0.114286	34.8286	Gene: Cre09.g392850, mRNA: Cre09.g392850	Cre09.g392850:c.6749+36C>T
chr16	5779087	Deletion	2	GC	-	24	49	48.9796	0.166667	30.125	Gene: Cre16.g678450, mRNA: Cre16.g678450	Cre16.g678450:c.451-89_451-88delGC
chr16	5779081	SNV	1	G	A	21	43	48.8372	0.047619	35.2381	Gene: Cre16.g678450, mRNA: Cre16.g678450	Cre16.g678450:c.451-82C>T
chr2	8066403	SNV	1	T	C	21	43	48.8372	0.26087	35.6522	Gene: g2687, Gene: g2688, mRNA: g2687, mRNA: g2687, mRNA: g2687, mRNA: g2688, mRNA: g2688, Three_prime_utr: PAC:26899741.three_prime_UTR.5, Three_prime_utr: PAC:26899742.three_prime_UTR.5
chr16	3248459	SNV	1	T	C	14	29	48.2759	0.5	38.375	CDS: g16088, Gene: g16088, mRNA: g16088	g16088:c.618A>G
chr6	1188902	SNV	1	C	G	14	29	48.2759	0.214286	35.6429	Gene: Cre06.g257500, Five_prime_utr: PAC:26893029.five_prime_UTR.1, mRNA: Cre06.g257500
chr6	6907157	SNV	1	C	G	13	27	48.1481	0	33.8462	CDS: g6845, Gene: g6845, mRNA: g6845	g6845:c.1446C>G		Integral membrane HPP family protein
chr15	492586	SNV	1	T	C	12	25	48	0.461538	35.2308	Gene: g15357, mRNA: g15357	g15357:c.1614+107A>G
scaffold_29	42719	SNV	1	C	A	11	23	47.8261	0	36.9091	Gene: g18323, Three_prime_utr: PAC:26904296.three_prime_UTR.1, mRNA: g18323
chr17	660595	SNV	1	G	A	40	84	47.619	0.463415	34.7073	Gene: Cre17.g700600, mRNA: Cre17.g700600			BTB/POZ domain-containing protein
chr12	1000185	SNV	1	C	T	10	21	47.619	0.2	34.3	Gene: g12153, mRNA: g12153	g12153:c.4032+33G>A
chr4	2331932	SNV	1	A	C	15	32	46.875	0.125	35.5	CDS: Cre04.g220750, Gene: Cre04.g220750, mRNA: Cre04.g220750	Cre04.g220750:c.2941T>G	Cre04.g220750:p.Ser981Ala
chr6	5306430	SNV	1	C	A	15	32	46.875	0.2	32.7333	Gene: Cre06.g283000, mRNA: Cre06.g283000	Cre06.g283000:c.1417-14C>A
chr13	2813588	SNV	1	C	G	21	45	46.6667	0.47619	36.3333	Gene: Cre13.g583100, mRNA: Cre13.g583100, Three_prime_utr: PAC:26898695.three_prime_UTR.1			KDO transferase A
chr17	660622	SNV	1	C	G	35	75	46.6667	0.485714	35.4857	Gene: Cre17.g700600, mRNA: Cre17.g700600
chr6	6907175	SNV	1	A	C	13	28	46.4286	0	35.8462	CDS: g6845, Gene: g6845, mRNA: g6845	g6845:c.1464A>C		Integral membrane HPP family protein
chr6	1184981	Insertion	9	-	TGACCAGTC	13	28	46.4286	0.461538	37.2222	Gene: Cre06.g257450, Five_prime_utr: PAC:26893545.five_prime_UTR.1, mRNA: Cre06.g257450			ATPase, F0/V0 complex, subunit C protein
chr15	1834504	SNV	1	C	A	13	28	46.4286	0	37.3846	Gene: g15525, mRNA: g15525	g15525:c.2582-13G>T
chr4	705145	SNV	1	T	C	55	119	46.2185	0.290909	33.9818	Gene: g4585, mRNA: g4585, Three_prime_utr: PAC:26906169.three_prime_UTR.1
chr4	741748	SNV	1	C	G	18	39	46.1538	0.166667	36.2222	CDS: g4593, Gene: g4593, mRNA: g4593	g4593:c.24C>G	g4593:p.Asp8Glu
chr16	1416044	SNV	1	A	G	12	26	46.1538	0.0833333	36	Gene: Cre16.g652300, mRNA: Cre16.g652300	Cre16.g652300:c.178+386A>G
chr15	492604	SNV	1	C	T	12	26	46.1538	0.4375	36.6875	Gene: g15357, mRNA: g15357	g15357:c.1614+89G>A
chr8	347913	SNV	1	A	G	18	39	46.1538	0.333333	34.2222	Gene: g8386, mRNA: g8386, Three_prime_utr: PAC:26888474.three_prime_UTR.1
chr17	2929758	SNV	1	G	T	23	50	46	0.423077	35.8462	Gene: g17423, mRNA: g17423	g17423:c.2888-6C>A		Protein of unknown function (DUF3754)
chr17	2713335	SNV	1	G	A	91	198	45.9596	0.373626	33.7802	Gene: Cre17.g718050, Five_prime_utr: PAC:26896378.five_prime_UTR.1, mRNA: Cre17.g718050
chr6	8745528	SNV	1	G	C	22	48	45.8333	0.0909091	36.3636	CDS: g7170, CDS: Cre06.g309850, Gene: Cre06.g309850, Gene: g7170, mRNA: Cre06.g309850, mRNA: g7170	Cre06.g309850:c.[149C>G]; g7170:c.[233C>G]	Cre06.g309850:p.[Ser50Cys]; g7170:p.[Ser78Cys]
chr12	209564	SNV	1	C	G	10	22	45.4545	0.2	34.9	CDS: g12033, CDS: g12033, Gene: g12033, mRNA: g12033, mRNA: g12033	g12033:c.[156C>G];[156C>G]
chr13	3036308	SNV	1	C	T	10	22	45.4545	0.3	36	CDS: g14346, CDS: g14346, Gene: g14346, mRNA: g14346, mRNA: g14346	g14346:c.[17718G>A];[18630G>A]		Leucine-rich receptor-like protein kinase family protein
chr6	5306405	SNV	1	C	T	15	33	45.4545	0.466667	32.8	Gene: Cre06.g283000, mRNA: Cre06.g283000	Cre06.g283000:c.1417-39C>T
chr7	2400261	Insertion	2	-	CA	15	33	45.4545	0.133333	35.2	Gene: Cre07.g328600, mRNA: Cre07.g328600	Cre07.g328600:c.975+69_975+70insTG		Transducin/WD40 repeat-like superfamily protein
chr10	1267337	Insertion	8	-	TGCATCGC	15	33	45.4545	0.4	37.4167	Gene: Cre10.g426900, mRNA: Cre10.g426900, Three_prime_utr: PAC:26905420.three_prime_UTR.1
chr16	3002063	SNV	1	A	T	10	22	45.4545	0.3	36.2	Gene: Cre16.g664600, Five_prime_utr: PAC:26892177.five_prime_UTR.1, mRNA: Cre16.g664600
chr17	4008829	Deletion	1	A	-	15	33	45.4545	0.4	35.2	Gene: Cre17.g728950, mRNA: Cre17.g728950	Cre17.g728950:c.698+103delT		cytidine/deoxycytidylate deaminase family protein
chr6	5306409	SNV	1	C	T	14	31	45.1613	0.428571	32.3571	Gene: Cre06.g283000, mRNA: Cre06.g283000	Cre06.g283000:c.1417-35C>T
chr15	1467769	SNV	1	G	A	14	31	45.1613	0.214286	35.3929	Gene: g15492, mRNA: g15492	g15492:c.3838-382G>A
chr15	1467770	SNV	1	A	G	14	31	45.1613	0.214286	35.3929	Gene: g15492, mRNA: g15492	g15492:c.3838-381A>G
chr2	8979964	SNV	1	G	A	9	20	45	0	35.6667	CDS: g2806, Gene: g2806, mRNA: g2806	g2806:c.1066C>T	g2806:p.Arg356Cys
chr6	7880314	SNV	1	G	A	71	158	44.9367	0.478873	33.662	Gene: Cre06.g303171, mRNA: Cre06.g303171, Three_prime_utr: PAC:26893592.three_prime_UTR.1
chr4	2334451	SNV	1	C	T	13	29	44.8276	0	36.1154	CDS: Cre04.g220750, Gene: Cre04.g220750, mRNA: Cre04.g220750	Cre04.g220750:c.422G>A	Cre04.g220750:p.Gly141Asn
chr1	4450253	Insertion	8	-	ATCTGCTA	21	47	44.6809	0.47619	37.756	CDS: Cre01.g030200, Gene: Cre01.g030200, mRNA: Cre01.g030200	Cre01.g030200:c.698_699insTAGCAGAT	Cre01.g030200:p.Asn233fs	Protein phosphatase 2C family protein
scaffold_22	1782	SNV	1	C	A	21	47	44.6809	0.346154	35.6154	CDS: g18199, Gene: g18199, mRNA: g18199	g18199:c.63G>T
chr6	7880311	SNV	1	A	G	65	146	44.5205	0.323077	34.8615	Gene: Cre06.g303171, mRNA: Cre06.g303171, Three_prime_utr: PAC:26893592.three_prime_UTR.1
chr16	11826	SNV	1	T	C	12	27	44.4444	0.384615	35.8462	CDS: g15545, Gene: g15545, mRNA: g15545	g15545:c.455A>G	g15545:p.Asp152Gly
chr14	2399367	Deletion	1	C	-	11	25	44	0.272727	29.4545	Gene: Cre14.g624450, Five_prime_utr: PAC:26891136.five_prime_UTR.1, mRNA: Cre14.g624450
chr9	2228565	SNV	1	C	G	27	62	43.5484	0.222222	33	Gene: Cre09.g392850, mRNA: Cre09.g392850	Cre09.g392850:c.6749+17G>C
chr4	2334319	Insertion	3	-	AGC	10	23	43.4783	0.3	35.5667	CDS: Cre04.g220750, Gene: Cre04.g220750, mRNA: Cre04.g220750	Cre04.g220750:c.554_555insGCT	Cre04.g220750:p.Thr185delinsThrLeu
chr12	907407	SNV	1	T	C	10	23	43.4783	0.307692	36	CDS: g12149, Gene: g12149, mRNA: g12149	g12149:c.4000A>G	g12149:p.Asn1334Asp
chr11	426792	SNV	1	T	G	19	44	43.1818	0.0526316	36.6842	Gene: g11515, mRNA: g11515, mRNA: g11515	g11515:c.[1048+91T>G];[1045+91T>G]		protein kinase family protein / protein phosphatase 2C ( PP2C) family protein
chr8	3194397	SNV	1	C	A	9	21	42.8571	0.3	35.2	CDS: g8799, Gene: g8799, mRNA: g8799	g8799:c.297G>T
chr14	635730	SNV	1	T	C	9	21	42.8571	0.111111	38	Gene: Cre14.g612200, Gene: g14753, mRNA: Cre14.g612200, mRNA: g14753	g14753:c.[536+459T>C]; Cre14.g612200:c.[536+459T>C]
chr17	531413	Deletion	2	AC	-	9	21	42.8571	0.111111	34.2222	Gene: Cre17.g699550, mRNA: Cre17.g699550	Cre17.g699550:c.2857-278_2857-277delGT
chr16	6975843	SNV	1	A	C	9	21	42.8571	0.444444	34	Gene: g16748, mRNA: g16748, Three_prime_utr: PAC:26891848.three_prime_UTR.1
chr7	4386051	SNV	1	G	A	26	61	42.623	0.392857	34.4286	Gene: Cre07.g341100, Gene: g7973, mRNA: Cre07.g341100, mRNA: g7973	Cre07.g341100:c.[289-60G>A]; g7973:c.[289-204G>A]
chr4	1355025	Insertion	2	-	GT	14	33	42.4242	0.0714286	37.75	Gene: g4685, mRNA: g4685	g4685:c.2068-37_2068-36insAC		polyribonucleotide nucleotidyltransferase, putative
chr8	3522245	Deletion	1	G	-	19	45	42.2222	0.421053	32.9474	Gene: Cre08.g375200, Gene: g8840, mRNA: Cre08.g375200, mRNA: g8840	Cre08.g375200:c.[903+531delG]; g8840:c.[903+531delG]		MIRO-related GTP-ase 1
chr4	861315	SNV	1	A	G	13	31	41.9355	0.428571	35.7143	CDS: g4616, Gene: g4616, mRNA: g4616	g4616:c.152A>G	g4616:p.His51Arg
chr16	3002060	Deletion	1	A	-	10	24	41.6667	0.3	32.5	Gene: Cre16.g664600, Five_prime_utr: PAC:26892177.five_prime_UTR.1, mRNA: Cre16.g664600
chr13	4597408	Insertion	2	-	GT	28	68	41.1765	0.321429	36.4107	Gene: Cre13.g604000, mRNA: Cre13.g604000, Three_prime_utr: PAC:26899235.three_prime_UTR.1
chr3	5077112	Insertion	8	-	CCATGCAG	16	39	41.0256	0.3125	36.0781	CDS: Cre03.g181150, Gene: Cre03.g181150, mRNA: Cre03.g181150	Cre03.g181150:c.60_61insCCATGCAG	Cre03.g181150:p.Ala21fs	Dynein light chain type 1 family protein
chr12	209570	SNV	1	A	G	9	22	40.9091	0.222222	34.3333	CDS: g12033, CDS: g12033, Gene: g12033, mRNA: g12033, mRNA: g12033	g12033:c.[162A>G];[162A>G]
chr12	907394	SNV	1	G	C	9	22	40.9091	0.3	36.1	CDS: g12149, Gene: g12149, mRNA: g12149	g12149:c.4013C>G	g12149:p.Ala1338Gly
chr2	8979959	SNV	1	A	T	9	22	40.9091	0	37.2222	CDS: g2806, Gene: g2806, mRNA: g2806	g2806:c.1071T>A
chr14	4118463	Deletion	1	A	-	9	22	40.9091	0.111111	26.2222	Gene: Cre14.g634150, mRNA: Cre14.g634150
chr2	8197179	SNV	1	T	A	18	44	40.9091	0.368421	37.5789	Gene: g2692, mRNA: g2692, Three_prime_utr: PAC:26899558.three_prime_UTR.1
chr15	489180	SNV	1	G	A	22	54	40.7407	0.291667	34.9167	Gene: Cre15.g636650, mRNA: Cre15.g636650, Three_prime_utr: PAC:26898241.three_prime_UTR.1			snRNA activating complex family protein
chr6	7880307	SNV	1	C	T	56	138	40.5797	0.357143	34.7321	Gene: Cre06.g303171, mRNA: Cre06.g303171, Three_prime_utr: PAC:26893592.three_prime_UTR.1
chr11	431591	SNV	1	A	C	32	79	40.5063	0.454545	36.9697	CDS: g11516, Gene: g11516, mRNA: g11516	g11516:c.322A>C	g11516:p.Lys108Gln	protein kinase family protein / protein phosphatase 2C ( PP2C) family protein
chr2	2966466	SNV	1	C	A	25	62	40.3226	0.44	32.96	Gene: g1807, mRNA: g1807, Three_prime_utr: PAC:26900355.three_prime_UTR.1
chr3	4522930	SNV	1	G	A	8	20	40	0.125	35.8125	CDS: g3646, CDS: g3646, Gene: g3646, mRNA: g3646, mRNA: g3646	g3646:c.[55C>T];[10C>T]	g3646:p.[Arg19Cys];[Arg4Cys]
chr4	1075887	SNV	1	G	T	22	55	40	0.454545	36.5	Gene: Cre04.g216300, mRNA: Cre04.g216300	Cre04.g216300:c.334+529G>T
chr12	3532250	Deletion	2	TG	-	8	20	40	0.375	31.375	Gene: Cre12.g513300, mRNA: Cre12.g513300	Cre12.g513300:c.631+40_631+41delTG
chr10	4966094	Deletion	1	A	-	12	30	40	0.5	29.1667	Gene: g11170, mRNA: g11170	g11170:c.239-39delT
chr2	9051204	SNV	1	A	T	16	40	40	0	37.375	Gene: g2819, mRNA: g2819, Three_prime_utr: PAC:26900969.three_prime_UTR.1
chr14	2646291	SNV	1	A	C	25	63	39.6825	0.48	36.28	Gene: Cre14.g626300, mRNA: Cre14.g626300, Three_prime_utr: PAC:26890799.three_prime_UTR.1
chr8	347968	SNV	1	G	T	34	86	39.5349	0.485714	35.3714	Gene: g8386, mRNA: g8386, Three_prime_utr: PAC:26888474.three_prime_UTR.1
chr15	489169	SNV	1	A	G	15	38	39.4737	0.0666667	37.5	Gene: Cre15.g636650, mRNA: Cre15.g636650, Three_prime_utr: PAC:26898241.three_prime_UTR.1
chr15	489171	SNV	1	G	T	15	38	39.4737	0.0666667	37.5	Gene: Cre15.g636650, mRNA: Cre15.g636650, Three_prime_utr: PAC:26898241.three_prime_UTR.1
chr17	660626	SNV	1	C	T	30	76	39.4737	0.4	34.5667	Gene: Cre17.g700600, mRNA: Cre17.g700600
chr2	8979903	SNV	1	G	A	13	33	39.3939	0.1875	36.5625	CDS: g2806, Gene: g2806, mRNA: g2806	g2806:c.1127C>T	g2806:p.Ser376Phe
chr2	6171977	SNV	1	G	A	13	33	39.3939	0.384615	34.6923	Gene: Cre02.g113700, mRNA: Cre02.g113700, Three_prime_utr: PAC:26899975.three_prime_UTR.1			uvrB/uvrC motif-containing protein
chr13	2685290	SNV	1	G	A	11	28	39.2857	0.0909091	37.7273	Gene: g14290, mRNA: g14290	g14290:c.8-435C>T
chr5	2941846	SNV	1	C	G	11	28	39.2857	0.5	36.6429	Gene: g5485, mRNA: g5485	g5485:c.1567-573G>C
chr6	6907152	SNV	1	G	T	9	23	39.1304	0	32.1111	CDS: g6845, Gene: g6845, mRNA: g6845	g6845:c.1441G>T	g6845:p.Gly481Cys
chr8	3086454	SNV	1	G	A	23	59	38.9831	0.347826	36.2174	Gene: g8786, mRNA: g8786	g8786:c.212-213G>A
chr6	2200858	SNV	1	G	A	19	49	38.7755	0.315789	35.9737	Gene: g5972, mRNA: g5972	g5972:c.1606+115C>T
chr6	2845782	SNV	1	C	T	52	135	38.5185	0.403846	34.0962	Gene: Cre06.g271800, Gene: g6099, mRNA: Cre06.g271800, mRNA: g6099, Three_prime_utr: PAC:26892966.three_prime_UTR.2, Three_prime_utr: PAC:26892965.three_prime_UTR.1			senescence-associated gene 29
chr16	11829	SNV	1	C	A	10	26	38.4615	0.3	35.7	CDS: g15545, Gene: g15545, mRNA: g15545	g15545:c.452G>T	g15545:p.Arg151Met
scaffold_22	1766	Deletion	1	T	-	20	52	38.4615	0.25	31.75	CDS: g18199, Gene: g18199, mRNA: g18199	g18199:c.79delA	g18199:p.Ile27fs
chr4	741751	SNV	1	G	A	15	39	38.4615	0.133333	36.0667	CDS: g4593, Gene: g4593, mRNA: g4593	g4593:c.27G>A
chr6	8745601	SNV	1	C	T	20	52	38.4615	0.363636	35.5	CDS: g7170, CDS: Cre06.g309850, Gene: Cre06.g309850, Gene: g7170, mRNA: Cre06.g309850, mRNA: g7170	Cre06.g309850:c.[76G>A]; g7170:c.[160G>A]	Cre06.g309850:p.[Ala26Thr]; g7170:p.[Ala54Thr]
chr7	3019492	SNV	1	T	C	10	26	38.4615	0	38.4	Gene: Cre07.g333400, mRNA: Cre07.g333400	Cre07.g333400:c.1105-458T>C
chr10	1713394	SNV	1	T	C	15	39	38.4615	0.4375	35.8125	Gene: Cre10.g430450, mRNA: Cre10.g430450	Cre10.g430450:c.993-213A>G		formyltetrahydrofolate deformylase, putative
chr2	8063795	SNV	1	G	T	20	52	38.4615	0.238095	36.9048	Gene: g2687, Gene: g2688, mRNA: g2687, mRNA: g2687, mRNA: g2687, mRNA: g2688, mRNA: g2688, Three_prime_utr: PAC:26899741.three_prime_UTR.6, Three_prime_utr: PAC:26899742.three_prime_UTR.6
chr12	151090	SNV	1	A	G	61	159	38.3648	0.212121	36.1212	Gene: Cre12.g484450, Five_prime_utr: PAC:26906549.five_prime_UTR.1, mRNA: Cre12.g484450
chr9	5405150	SNV	1	A	G	8	21	38.0952	0.125	36.75	CDS: g9946, Gene: g9946, mRNA: g9946	g9946:c.882A>G
chr17	3136273	SNV	1	C	T	8	21	38.0952	0.375	34.75	Gene: Cre17.g721550, Gene: g17457, mRNA: Cre17.g721550, mRNA: g17457	Cre17.g721550:c.[118-61G>A]; g17457:c.[118-61G>A]		Ubiquitin C-terminal hydrolases superfamily protein
chr17	966523	SNV	1	C	G	8	21	38.0952	0.375	34.625	Gene: g17044, mRNA: g17044, Three_prime_utr: PAC:26896860.three_prime_UTR.1
chr8	585657	SNV	1	G	A	11	29	37.931	0	37.5455	Gene: Cre08.g359567, Gene: g8422, mRNA: Cre08.g359567, mRNA: g8422	g8422:c.[1978-274G>A]; Cre08.g359567:c.[1978-277G>A]
chr6	2845785	SNV	1	C	T	53	141	37.5887	0.264151	33.5094	Gene: Cre06.g271800, Gene: g6099, mRNA: Cre06.g271800, mRNA: g6099, Three_prime_utr: PAC:26892966.three_prime_UTR.2, Three_prime_utr: PAC:26892965.three_prime_UTR.1
chr11	426223	Deletion	3	CGC	-	12	32	37.5	0.333333	34.75	CDS: g11515, CDS: g11515, Gene: g11515, mRNA: g11515, mRNA: g11515	g11515:c.[570_572delCGC];[567_569delCGC]	g11515:p.[Ala190_Ala191delinsAla];[Ala189_Ala190delinsAla]	protein kinase family protein / protein phosphatase 2C ( PP2C) family protein
chr16	6741038	Deletion	1	G	-	12	32	37.5	0.0833333	32.0833	CDS: g16707, Gene: g16707, mRNA: g16707	g16707:c.768delC	g16707:p.Ile256fs
chr2	1973825	Insertion	1	-	G	18	48	37.5	0.5	36.1111	Gene: Cre02.g088200, Five_prime_utr: PAC:26900676.five_prime_UTR.1, mRNA: Cre02.g088200			PDI-like 1-4
chr4	2331081	SNV	1	T	C	12	32	37.5	0.333333	34.125	Gene: Cre04.g220750, mRNA: Cre04.g220750, Three_prime_utr: PAC:26905548.three_prime_UTR.1
chr4	2331082	SNV	1	T	G	12	32	37.5	0.333333	34.125	Gene: Cre04.g220750, mRNA: Cre04.g220750, Three_prime_utr: PAC:26905548.three_prime_UTR.1
chr13	2939140	SNV	1	C	T	15	40	37.5	0.333333	34.2	Gene: g14332, mRNA: g14332	g14332:c.112+33C>T
chr4	33894	SNV	1	T	C	6	16	37.5	0.333333	35.3333	Gene: g4495, mRNA: g4495	g4495:c.1843+422A>G		defective in exine formation protein (DEX1)
chr4	355052	SNV	1	C	T	12	32	37.5	0.0769231	37.1538	Gene: g4542, mRNA: g4542	g4542:c.819-450G>A
chr2	8150807	SNV	1	A	C	134	359	37.3259	0.425532	35.9433	Gene: g2688, mRNA: g2688, mRNA: g2688
chr14	2646299	SNV	1	T	C	25	67	37.3134	0.481481	35.8889	Gene: Cre14.g626300, mRNA: Cre14.g626300, Three_prime_utr: PAC:26890799.three_prime_UTR.1
chr12	1686008	SNV	1	T	C	22	59	37.2881	0.478261	34.5217	Gene: Cre12.g485800, mRNA: Cre12.g485800	Cre12.g485800:c.1397-154A>G		FtsH extracellular protease family
chr2	8063453	SNV	1	G	T	38	102	37.2549	0.243902	35.8537	Gene: g2687, Gene: g2688, mRNA: g2687, mRNA: g2687, mRNA: g2687, mRNA: g2688, mRNA: g2688
chr12	911248	Deletion	3	CCG	-	16	43	37.2093	0.3125	26.5625	Gene: g12149, mRNA: g12149	g12149:c.3172+1301_3172+1303delCGG
chr14	2692480	SNV	1	G	C	65	175	37.1429	0.253731	36.0149	Gene: g15090, mRNA: g15090	g15090:c.136+118C>G
chr12	1001778	SNV	1	C	T	10	27	37.037	0.454545	36.0909	CDS: g12153, Gene: g12153, mRNA: g12153	g12153:c.2722G>A	g12153:p.Ala908Thr	phosphate transporter 2;1
chr12	2675704	Deletion	2	CA	-	10	27	37.037	0.4	33.8	Gene: Cre12.g504050, mRNA: Cre12.g504050	Cre12.g504050:c.617-136_617-135delCA		TRAM, LAG1 and CLN8 (TLC) lipid-sensing domain containing protein
chr15	1466378	SNV	1	G	T	10	27	37.037	0.2	36.3	Gene: g15492, mRNA: g15492	g15492:c.3838-1773G>T
chr6	2221030	SNV	1	A	G	24	65	36.9231	0.333333	35.5185	Gene: g5977, mRNA: g5977
scaffold_20	28634	SNV	1	T	C	11	30	36.6667	0.333333	36.1667	CDS: g18154, Gene: g18154, mRNA: g18154	g18154:c.960T>C
chr14	1284284	SNV	1	T	G	15	41	36.5854	0.4375	36.3125	Gene: Cre14.g616650, mRNA: Cre14.g616650, Three_prime_utr: PAC:26891186.three_prime_UTR.2
chr12	1686033	SNV	1	A	G	34	93	36.5591	0.441176	35.8824	Gene: Cre12.g485800, mRNA: Cre12.g485800	Cre12.g485800:c.1396+179T>C
chr3	6905736	SNV	1	G	A	16	44	36.3636	0.176471	35.6471	CDS: g4119, Gene: g4119, mRNA: g4119	g4119:c.420G>A
chr1	2629774	Deletion	2	GT	-	8	22	36.3636	0.125	31.875	Gene: Cre01.g015250, mRNA: Cre01.g015250	Cre01.g015250:c.224-80_224-79delAC		DNA binding;nucleotide binding;nucleic acid binding;DNA-directed DNA polymerases;DNA-directed DNA polymerases
chr8	636141	SNV	1	A	G	8	22	36.3636	0.25	33.875	Gene: Cre08.g359950, mRNA: Cre08.g359950	Cre08.g359950:c.217-73T>C
chr17	4598746	SNV	1	G	T	16	44	36.3636	0.5	36.9	Gene: g17715, mRNA: g17715	g17715:c.2202-72G>T
scaffold_30	12947	SNV	1	C	T	12	33	36.3636	0.4375	36.1875	Gene: g18326, mRNA: g18326	g18326:c.268-76G>A
chr8	347987	SNV	1	G	T	24	66	36.3636	0.458333	35.5	Gene: g8386, mRNA: g8386, Three_prime_utr: PAC:26888474.three_prime_UTR.1
chr4	811000	SNV	1	C	T	25	69	36.2319	0.24	36.5067	Gene: g4606, mRNA: g4606, Three_prime_utr: PAC:26906172.three_prime_UTR.1
chr4	811001	SNV	1	C	T	25	69	36.2319	0.24	36.5067	Gene: g4606, mRNA: g4606, Three_prime_utr: PAC:26906172.three_prime_UTR.1
chr4	811002	SNV	1	C	T	25	69	36.2319	0.24	36.5067	Gene: g4606, mRNA: g4606, Three_prime_utr: PAC:26906172.three_prime_UTR.1
chr10	1713396	Deletion	1	A	-	17	47	36.1702	0.470588	30.1765	Gene: Cre10.g430450, mRNA: Cre10.g430450	Cre10.g430450:c.993-215delT
chr15	1403377	SNV	1	G	A	9	25	36	0.1	36.6	Gene: g15489, mRNA: g15489	g15489:c.25+70C>T
chr15	1467687	SNV	1	G	C	9	25	36	0.111111	35.4444	Gene: g15492, mRNA: g15492	g15492:c.3838-464G>C
scaffold_29	42730	SNV	1	C	T	9	25	36	0	36.7778	Gene: g18323, Three_prime_utr: PAC:26904296.three_prime_UTR.1, mRNA: g18323
chr8	347998	Deletion	1	C	-	23	64	35.9375	0.434783	31.4783	Gene: g8386, mRNA: g8386, Three_prime_utr: PAC:26888474.three_prime_UTR.1
chr16	4037984	SNV	1	G	A	19	53	35.8491	0.473684	36.3684	CDS: g16226, Gene: g16226, mRNA: g16226	g16226:c.2350G>A	g16226:p.Gly784Asn
chr16	4037985	SNV	1	G	A	19	53	35.8491	0.473684	36.3684	CDS: g16226, Gene: g16226, mRNA: g16226	g16226:c.2351G>A	g16226:p.Gly784Asn
chr4	2535295	SNV	1	C	T	10	28	35.7143	0.272727	33.8182	CDS: Cre04.g222250, Gene: Cre04.g222250, mRNA: Cre04.g222250	Cre04.g222250:c.1214G>A	Cre04.g222250:p.Arg405His
chr9	5457307	SNV	1	C	T	10	28	35.7143	0	38.2	CDS: g9954, Gene: g9954, mRNA: g9954	g9954:c.59C>T	g9954:p.Thr20Ile
chr2	1937575	Insertion	2	-	TG	20	56	35.7143	0.5	36.3	Gene: Cre02.g087900, mRNA: Cre02.g087900	Cre02.g087900:c.1148-150_1148-149insCA		Protein kinase superfamily protein with octicosapeptide/Phox/Bem1p domain
chr3	8352708	Insertion	1	-	C	10	28	35.7143	0.4	35.8	Gene: Cre03.g198800, Five_prime_utr: PAC:26902141.five_prime_UTR.1, mRNA: Cre03.g198800			myb-like transcription factor family protein
chr5	2076239	SNV	1	G	A	10	28	35.7143	0.4	35.1	Gene: Cre05.g234600, mRNA: Cre05.g234600	Cre05.g234600:c.3036+86C>T
chr10	6533841	SNV	1	T	G	15	42	35.7143	0.4	35.7333	Gene: Cre10.g466900, Five_prime_utr: PAC:26905328.five_prime_UTR.1, mRNA: Cre10.g466900
chr12	151099	SNV	1	A	G	55	154	35.7143	0.189655	36.6897	Gene: Cre12.g484450, Five_prime_utr: PAC:26906549.five_prime_UTR.1, mRNA: Cre12.g484450
scaffold_20	28605	SNV	1	G	A	11	31	35.4839	0.25	36.5833	CDS: g18154, Gene: g18154, mRNA: g18154	g18154:c.931G>A	g18154:p.Ala311Thr
chr6	6907187	SNV	1	T	C	11	31	35.4839	0	37.0909	CDS: g6845, Gene: g6845, mRNA: g6845	g6845:c.1476T>C
chr1	5875353	SNV	1	A	G	23	65	35.3846	0.26087	35.1739	Gene: Cre01.g041900, mRNA: Cre01.g041900, Three_prime_utr: PAC:26902996.three_prime_UTR.1
chr5	162387	SNV	1	G	A	37	105	35.2381	0.108108	37.3514	Gene: g5084, mRNA: g5084, Three_prime_utr: PAC:26897863.three_prime_UTR.1
chr8	4791848	SNV	1	G	C	25	71	35.2113	0.269231	37.6538	Gene: g9045, mRNA: g9045, mRNA: g9045	g9045:c.[872+616G>C];[872+616G>C]
scaffold_20	28522	SNV	1	C	T	13	37	35.1351	0.357143	36.8571	CDS: g18154, Gene: g18154, mRNA: g18154	g18154:c.848C>T	g18154:p.Thr283Met
chr8	3050642	SNV	1	G	A	52	148	35.1351	0.25	35.3214	CDS: g8779, Gene: g8779, mRNA: g8779	g8779:c.1638G>A
chr17	3136343	SNV	1	T	C	13	37	35.1351	0.153846	35	Gene: Cre17.g721550, Gene: g17457, mRNA: Cre17.g721550, mRNA: g17457	Cre17.g721550:c.[118-131A>G]; g17457:c.[118-131A>G]
chr16	890918	Insertion	4	-	GCAA	7	20	35	0.285714	34.6071	Gene: Cre16.g648200, Gene: g15688, mRNA: Cre16.g648200, mRNA: g15688	Cre16.g648200:c.[807+372_807+373insTTGC]; g15688:c.[807+372_807+373insTTGC]		Cytochrome P450 superfamily protein
chr2	8000375	Deletion	6	GTGTGT	-	7	20	35	0.285714	37.7143	Gene: g2679, mRNA: g2679	g2679:c.305+59_305+64delACACAC
chr3	8415410	SNV	1	C	G	44	126	34.9206	0.25	34.8409	Gene: g4359, Five_prime_utr: PAC:26902533.five_prime_UTR.1, mRNA: g4359
chr12	1686043	SNV	1	A	G	31	89	34.8315	0.451613	35.9355	Gene: Cre12.g485800, mRNA: Cre12.g485800	Cre12.g485800:c.1396+169T>C
chr1	5875356	SNV	1	A	G	24	69	34.7826	0.28	36.6	Gene: Cre01.g041900, mRNA: Cre01.g041900, Three_prime_utr: PAC:26902996.three_prime_UTR.1
chr11	2627717	SNV	1	G	A	8	23	34.7826	0	37.125	Gene: Cre11.g476400, mRNA: Cre11.g476400	Cre11.g476400:c.1006-394C>T		DNA glycosylase superfamily protein
chr17	3136274	Insertion	1	-	A	8	23	34.7826	0.375	35.625	Gene: Cre17.g721550, Gene: g17457, mRNA: Cre17.g721550, mRNA: g17457	Cre17.g721550:c.[118-62_118-61insT]; g17457:c.[118-62_118-61insT]
chr14	522231	SNV	1	A	G	65	187	34.7594	0.476923	35.7077	Gene: Cre14.g611450, mRNA: Cre14.g611450, Three_prime_utr: PAC:26890822.three_prime_UTR.1			Plastid-lipid associated protein PAP / fibrillin family protein
chr14	2646304	SNV	1	T	A	20	58	34.4828	0.5	36.225	Gene: Cre14.g626300, mRNA: Cre14.g626300, Three_prime_utr: PAC:26890799.three_prime_UTR.1
chr14	2646306	SNV	1	A	T	20	58	34.4828	0.5	36.225	Gene: Cre14.g626300, mRNA: Cre14.g626300, Three_prime_utr: PAC:26890799.three_prime_UTR.1
chr16	3944358	SNV	1	C	T	12	35	34.2857	0.25	34.9167	Gene: g16214, mRNA: g16214	g16214:c.416+667C>T
chr12	901545	SNV	1	G	A	30	88	34.0909	0.419355	35.129	Gene: g12148, mRNA: g12148, Three_prime_utr: PAC:26907483.three_prime_UTR.1
chr2	8536683	SNV	1	G	A	16	47	34.0426	0.375	35.875	Gene: g2737, mRNA: g2737, Three_prime_utr: PAC:26900493.three_prime_UTR.1
chr10	1073863	SNV	1	G	C	17	50	34	0.0588235	37.3529	Gene: Cre10.g425300, mRNA: Cre10.g425300	Cre10.g425300:c.463+45C>G		glutamine-dependent asparagine synthase 1
chr8	347994	SNV	1	C	G	17	50	34	0.176471	36.2353	Gene: g8386, mRNA: g8386, Three_prime_utr: PAC:26888474.three_prime_UTR.1
chr4	458850	SNV	1	A	T	18	53	33.9623	0.388889	35.8889	Gene: g4556, mRNA: g4556	g4556:c.864+112A>T		Galactose oxidase/kelch repeat superfamily protein
chr9	2355990	Deletion	3	GCG	-	96	283	33.9223	0.447917	33.5208	Gene: Cre09.g392000, Gene: g9452, Five_prime_utr: PAC:26895953.five_prime_UTR.1, Five_prime_utr: PAC:26895952.five_prime_UTR.1, mRNA: Cre09.g392000, mRNA: g9452			exocyst complex component sec3A
chr11	92479	SNV	1	G	A	21	62	33.871	0.333333	36.8095	Gene: g11464, mRNA: g11464, Three_prime_utr: PAC:26890493.three_prime_UTR.1
chr14	2646323	SNV	1	A	T	22	65	33.8462	0.434783	34.8261	Gene: Cre14.g626300, mRNA: Cre14.g626300, Three_prime_utr: PAC:26890799.three_prime_UTR.1
chr16	4038253	SNV	1	T	C	25	74	33.7838	0.04	36.84	Gene: g16226, mRNA: g16226	g16226:c.2422-129T>C
chr4	3660855	Insertion	6	-	GGCGGC	8	24	33.3333	0.375	35.9792	CDS: Cre04.g228850, Gene: Cre04.g228850, mRNA: Cre04.g228850	Cre04.g228850:c.1682_1683insGGCGGC	Cre04.g228850:p.Ala561delinsAlaAlaAla
chr7	4385729	SNV	1	C	G	8	24	33.3333	0.375	37.375	CDS: Cre07.g341100, CDS: g7973, Gene: Cre07.g341100, Gene: g7973, mRNA: Cre07.g341100, mRNA: g7973	Cre07.g341100:c.[179C>G]; g7973:c.[179C>G]	Cre07.g341100:p.[Thr60Ser]; g7973:p.[Thr60Ser]
chr15	107907	SNV	1	C	T	7	21	33.3333	0.428571	34.5714	CDS: g15309, Gene: g15309, mRNA: g15309	g15309:c.378G>A
chr13	16330	SNV	1	A	G	7	21	33.3333	0	33.1429	Gene: Cre13.g561800, mRNA: Cre13.g561800	Cre13.g561800:c.2661-218T>C
chr13	4984002	Deletion	3	CTG	-	8	24	33.3333	0.5	36.375	Gene: Cre13.g606550, mRNA: Cre13.g606550	Cre13.g606550:c.847+73_847+75delCTG
chr17	3575122	Deletion	3	CAA	-	9	27	33.3333	0.111111	29.1111	Gene: Cre17.g725600, mRNA: Cre17.g725600	Cre17.g725600:c.1241+7_1241+9delTTG
chr11	715633	SNV	1	T	C	7	21	33.3333	0.142857	36.8571	Gene: g11558, Five_prime_utr: PAC:26890436.five_prime_UTR.1, mRNA: g11558
chr14	1171805	SNV	1	G	T	8	24	33.3333	0.125	36.125	Gene: g14837, mRNA: g14837	g14837:c.2410-705C>A
chr15	491062	SNV	1	A	G	14	42	33.3333	0.428571	35.5714	Gene: g15357, mRNA: g15357	g15357:c.1615-244T>C
chr15	1463640	SNV	1	C	T	7	21	33.3333	0.285714	35.4286	Gene: g15492, mRNA: g15492	g15492:c.3837+3428C>T
chr16	6975875	SNV	1	C	A	9	27	33.3333	0.444444	35	Gene: g16748, mRNA: g16748, Three_prime_utr: PAC:26891848.three_prime_UTR.1
chr16	6975887	SNV	1	C	T	8	24	33.3333	0.5	36.375	Gene: g16748, mRNA: g16748, Three_prime_utr: PAC:26891848.three_prime_UTR.1
scaffold_23	19311	SNV	1	C	A	8	24	33.3333	0.454545	36.8182	Gene: g18231, mRNA: g18231, Three_prime_utr: PAC:26888778.three_prime_UTR.1
scaffold_44	4699	SNV	1	C	T	23	69	33.3333	0.391304	37.7391	Gene: g18392, Three_prime_utr: PAC:26892952.three_prime_UTR.1, mRNA: g18392
chr6	6373957	SNV	1	G	A	32	96	33.3333	0.46875	35.0625	Gene: g6770, mRNA: g6770, Three_prime_utr: PAC:26894131.three_prime_UTR.1
chr8	1314027	SNV	1	G	A	7	21	33.3333	0.285714	37.5714	Gene: g8521, mRNA: g8521	g8521:c.4534+432G>A		polymerase gamma 2
chr8	4750497	SNV	1	G	A	12	36	33.3333	0.416667	35.7917	Gene: g9044, mRNA: g9044, mRNA: g9044
chr10	5784751	SNV	1	C	G	29	88	32.9545	0.482759	33.6207	Gene: g11310, mRNA: g11310, Three_prime_utr: PAC:26904797.three_prime_UTR.1
chr15	490444	SNV	1	C	T	22	67	32.8358	0.272727	36.9091	Gene: g15357, mRNA: g15357, Three_prime_utr: PAC:26898114.three_prime_UTR.1
chr4	1075849	SNV	1	G	A	19	58	32.7586	0.315789	36.3158	Gene: Cre04.g216300, mRNA: Cre04.g216300	Cre04.g216300:c.334+491G>A
chr15	489219	Insertion	2	-	GA	18	55	32.7273	0.333333	34.4167	Gene: Cre15.g636650, mRNA: Cre15.g636650, Three_prime_utr: PAC:26898241.three_prime_UTR.1
chr15	489230	SNV	1	G	T	16	49	32.6531	0.4375	34.25	Gene: Cre15.g636650, mRNA: Cre15.g636650, Three_prime_utr: PAC:26898241.three_prime_UTR.1
chr10	5784743	SNV	1	G	C	31	95	32.6316	0.483871	33.5161	Gene: g11310, mRNA: g11310, Three_prime_utr: PAC:26904797.three_prime_UTR.1
chr6	6710655	SNV	1	G	A	15	46	32.6087	0.133333	37.5333	CDS: g6814, Gene: g6814, mRNA: g6814	g6814:c.7623C>T		Bifunctional inhibitor/lipid-transfer protein/seed storage 2S albumin superfamily protein
chr17	3573886	SNV	1	A	G	31	96	32.2917	0.451613	35.2581	Gene: Cre17.g725600, mRNA: Cre17.g725600
chr6	2845815	SNV	1	A	T	40	124	32.2581	0.225	34.825	Gene: Cre06.g271800, Gene: g6099, mRNA: Cre06.g271800, mRNA: g6099, Three_prime_utr: PAC:26892966.three_prime_UTR.2, Three_prime_utr: PAC:26892965.three_prime_UTR.1
chr14	2646112	SNV	1	T	C	10	31	32.2581	0.2	36.2	Gene: Cre14.g626300, mRNA: Cre14.g626300, Three_prime_utr: PAC:26890799.three_prime_UTR.1
chr6	6373969	SNV	1	A	G	29	90	32.2222	0.448276	33.8621	Gene: g6770, mRNA: g6770, Three_prime_utr: PAC:26894131.three_prime_UTR.1
chr8	4228629	SNV	1	T	G	9	28	32.1429	0.333333	37.2222	Gene: Cre08.g380550, mRNA: Cre08.g380550	Cre08.g380550:c.1261-83T>G		NAD(P)-binding Rossmann-fold superfamily protein
chr2	8200642	Deletion	1	C	-	27	84	32.1429	0.333333	32.963	Gene: g2693, mRNA: g2693, Three_prime_utr: PAC:26900314.three_prime_UTR.1
chr17	4849782	Insertion	1	-	A	17	53	32.0755	0.294118	36.5882	Gene: g17748, Gene: g17749, Five_prime_utr: PAC:26896380.five_prime_UTR.1, mRNA: g17748, mRNA: g17749, Three_prime_utr: PAC:26896832.three_prime_UTR.1
chr17	984019	SNV	1	G	A	8	25	32	0.25	37.125	CDS: g17047, Gene: g17047, mRNA: g17047	g17047:c.106C>T	g17047:p.Pro36Ser
chr17	984021	SNV	1	C	T	8	25	32	0.25	37.125	CDS: g17047, Gene: g17047, mRNA: g17047	g17047:c.104G>A	g17047:p.Ser35Asn
chr5	2862559	Insertion	7	-	TTAGGCC	8	25	32	0.5	37.2321	CDS: g5474, Gene: g5474, mRNA: g5474	g5474:c.252_253insTTAGGCC	g5474:p.Arg85fs
chr12	1007146	SNV	1	A	G	32	100	32	0.46875	35.1875	Gene: g12153, mRNA: g12153	g12153:c.61-40T>C
chr15	107812	SNV	1	A	G	8	25	32	0.375	37.125	Gene: g15309, mRNA: g15309, Three_prime_utr: PAC:26898347.three_prime_UTR.1
chr2	3059535	SNV	1	G	A	8	25	32	0.375	35.25	Gene: g1822, Five_prime_utr: PAC:26899530.five_prime_UTR.1, mRNA: g1822
chr3	3501316	SNV	1	G	A	8	25	32	0.25	35.25	Gene: g3444, mRNA: g3444, Three_prime_utr: PAC:26902850.three_prime_UTR.1
chr14	522255	SNV	1	A	G	59	185	31.8919	0.389831	35.0508	Gene: Cre14.g611450, mRNA: Cre14.g611450, Three_prime_utr: PAC:26890822.three_prime_UTR.1
chr5	18383	SNV	1	G	T	7	22	31.8182	0.428571	35	CDS: g5076, CDS: g5076, Gene: g5076, mRNA: g5076, mRNA: g5076	g5076:c.[462C>A];[3129C>A]
chr15	248626	Deletion	1	C	-	7	22	31.8182	0.428571	32.2857	Gene: Cre15.g640800, mRNA: Cre15.g640800, Three_prime_utr: PAC:26898121.three_prime_UTR.2			Homeodomain-like superfamily protein
chr15	1465793	SNV	1	C	G	7	22	31.8182	0.285714	37.2857	Gene: g15492, mRNA: g15492	g15492:c.3838-2358C>G
chr16	6975890	SNV	1	A	C	7	22	31.8182	0.428571	37.4286	Gene: g16748, mRNA: g16748, Three_prime_utr: PAC:26891848.three_prime_UTR.1
chr2	3059556	SNV	1	G	T	7	22	31.8182	0.428571	34.4286	Gene: g1822, Five_prime_utr: PAC:26899530.five_prime_UTR.1, mRNA: g1822
chr4	33922	SNV	1	T	C	7	22	31.8182	0.142857	38.7143	Gene: g4495, mRNA: g4495	g4495:c.1843+394A>G
chr8	1314033	SNV	1	C	T	7	22	31.8182	0.285714	37	Gene: g8521, mRNA: g8521	g8521:c.4534+438C>T
chr12	907718	SNV	1	T	C	40	126	31.746	0.238095	37.2143	Gene: g12149, mRNA: g12149	g12149:c.3698-9A>G
chr5	1267345	SNV	1	G	T	40	126	31.746	0.45	33.1	Gene: g5228, Five_prime_utr: PAC:26897727.five_prime_UTR.1, Five_prime_utr: PAC:26897728.five_prime_UTR.1, mRNA: g5228, mRNA: g5228			Glycosyl hydrolase family protein with chitinase insertion domain
chr15	489220	Insertion	1	-	G	18	57	31.5789	0.333333	36.1667	Gene: Cre15.g636650, mRNA: Cre15.g636650, Three_prime_utr: PAC:26898241.three_prime_UTR.1
chr10	3455170	Deletion	10	CGCGTGTAAC	-	23	73	31.5068	0.217391	35.9565	Gene: g10934, Five_prime_utr: PAC:26904952.five_prime_UTR.1, mRNA: g10934
chr4	861304	SNV	1	A	C	11	35	31.4286	0.333333	36.1667	CDS: g4616, Gene: g4616, mRNA: g4616	g4616:c.141A>C
chr15	1455484	SNV	1	T	C	11	35	31.4286	0.25	36.0833	Gene: g15491, Five_prime_utr: PAC:26898349.five_prime_UTR.1, mRNA: g15491
chr10	5784737	SNV	1	T	G	31	99	31.3131	0.451613	33.6452	Gene: g11310, mRNA: g11310, Three_prime_utr: PAC:26904797.three_prime_UTR.1
chr12	654828	SNV	1	C	A	15	48	31.25	0.25	36.8125	Gene: g12111, mRNA: g12111	g12111:c.1211+240G>T
chr6	4041259	SNV	1	C	T	5	16	31.25	0	37.6	Gene: g6350, mRNA: g6350	g6350:c.402+138C>T		purin-rich alpha 1
chr6	4041261	SNV	1	C	T	5	16	31.25	0	37.6	Gene: g6350, mRNA: g6350	g6350:c.402+140C>T
scaffold_20	28628	SNV	1	G	A	9	29	31.0345	0.222222	37.7778	CDS: g18154, Gene: g18154, mRNA: g18154	g18154:c.954G>A
chr3	821039	SNV	1	C	A	35	113	30.9735	0.0571429	35.1429	Gene: g2986, mRNA: g2986, Three_prime_utr: PAC:26902284.three_prime_UTR.1
chr15	491066	SNV	1	A	C	13	42	30.9524	0.384615	35.7692	Gene: g15357, mRNA: g15357	g15357:c.1615-248T>G
chr4	2335371	SNV	1	A	T	17	55	30.9091	0	37.2941	Gene: Cre04.g220751, mRNA: Cre04.g220751, Three_prime_utr: PAC:26905963.three_prime_UTR.1
scaffold_44	4675	SNV	1	T	C	21	68	30.8824	0.5	37.2727	Gene: g18392, Three_prime_utr: PAC:26892952.three_prime_UTR.1, mRNA: g18392
chr11	448891	SNV	1	A	G	8	26	30.7692	0.333333	36.6667	CDS: g11519, Gene: g11519, mRNA: g11519	g11519:c.1938T>C		protein kinase family protein / protein phosphatase 2C ( PP2C) family protein
chr16	4147862	SNV	1	G	C	12	39	30.7692	0.416667	36.0833	CDS: g16253, CDS: g16253, CDS: g16253, Gene: g16253, mRNA: g16253, mRNA: g16253, mRNA: g16253	g16253:c.[150G>C];[150G>C];[150G>C]
chr2	8979489	SNV	1	G	A	12	39	30.7692	0.230769	34.9231	CDS: g2806, Gene: g2806, mRNA: g2806	g2806:c.1541C>T	g2806:p.Ala514Val
chr4	741760	SNV	1	T	G	12	39	30.7692	0.25	34.9167	CDS: g4593, Gene: g4593, mRNA: g4593	g4593:c.36T>G
chr2	5660005	Deletion	1	T	-	8	26	30.7692	0	37.375	Gene: Cre02.g109650, mRNA: Cre02.g109650, Three_prime_utr: PAC:26901052.three_prime_UTR.1			BEL1-like homeodomain 10
chr2	6172009	SNV	1	A	T	8	26	30.7692	0.5	33.125	Gene: Cre02.g113700, mRNA: Cre02.g113700, Three_prime_utr: PAC:26899975.three_prime_UTR.1
chr14	1284275	Deletion	4	GCCC	-	12	39	30.7692	0.333333	30.5	Gene: Cre14.g616650, mRNA: Cre14.g616650, Three_prime_utr: PAC:26891186.three_prime_UTR.2
chr13	2685267	SNV	1	C	T	8	26	30.7692	0.125	38.5	Gene: g14290, mRNA: g14290	g14290:c.8-412G>A
chr16	4037975	SNV	1	G	T	19	62	30.6452	0.421053	37.1053	CDS: g16226, Gene: g16226, mRNA: g16226	g16226:c.2341G>T	g16226:p.Val781Leu
chr12	901509	SNV	1	A	G	22	72	30.5556	0.478261	36.3913	Gene: g12148, mRNA: g12148, Three_prime_utr: PAC:26907483.three_prime_UTR.1
chr4	458803	SNV	1	G	A	11	36	30.5556	0.454545	35.3636	Gene: g4556, mRNA: g4556	g4556:c.864+65G>A
chr4	3873176	SNV	1	A	G	11	36	30.5556	0.272727	37.1364	Gene: g5041, mRNA: g5041, Three_prime_utr: PAC:26906141.three_prime_UTR.1			VH1-interacting kinase
chr4	3873177	SNV	1	A	G	11	36	30.5556	0.272727	37.1364	Gene: g5041, mRNA: g5041, Three_prime_utr: PAC:26906141.three_prime_UTR.1
chr2	8197624	SNV	1	A	G	7	23	30.4348	0.428571	37	CDS: g2692, Gene: g2692, mRNA: g2692	g2692:c.1462T>C	g2692:p.Phe488Leu
chr4	1965753	Deletion	1	C	-	7	23	30.4348	0.428571	28.5714	Gene: Cre04.g218500, mRNA: Cre04.g218500	Cre04.g218500:c.1063-149delG
chr16	891021	SNV	1	C	G	7	23	30.4348	0.142857	34.2857	Gene: Cre16.g648200, Gene: g15688, mRNA: Cre16.g648200, mRNA: g15688	Cre16.g648200:c.[807+269G>C]; g15688:c.[807+269G>C]
chr16	4668059	Deletion	4	TGTG	-	7	23	30.4348	0.285714	37.5714	Gene: Cre16.g687350, mRNA: Cre16.g687350	Cre16.g687350:c.420-84_420-81delCACA		acyl-CoA oxidase 3
chr14	3540281	SNV	1	C	A	7	23	30.4348	0	36.7143	Gene: g15203, mRNA: g15203, mRNA: g15203	g15203:c.[574-247G>T];[637-247G>T]		autophagy protein Apg5 family
scaffold_27	15905	Deletion	1	A	-	7	23	30.4348	0	35.2857	Gene: g18301, Five_prime_utr: PAC:26901090.five_prime_UTR.1, mRNA: g18301
chr12	907736	SNV	1	C	T	44	145	30.3448	0.276596	35.0851	Gene: g12149, mRNA: g12149	g12149:c.3698-27G>A
chr14	2692507	Deletion	1	T	-	115	379	30.343	0.33913	31.8435	Gene: g15090, mRNA: g15090	g15090:c.136+91delA
chr16	6741125	SNV	1	G	A	10	33	30.303	0.2	35.05	CDS: g16707, Gene: g16707, mRNA: g16707	g16707:c.681C>T
chr16	6741124	SNV	1	C	T	10	33	30.303	0.2	35.05	CDS: g16707, Gene: g16707, mRNA: g16707	g16707:c.682G>A	g16707:p.Glu228Lys
chr4	2331072	Deletion	3	AGC	-	10	33	30.303	0.5	33.9	Gene: Cre04.g220750, mRNA: Cre04.g220750, Three_prime_utr: PAC:26905548.three_prime_UTR.1
chr15	489243	SNV	1	G	T	10	33	30.303	0.4	35.9	Gene: Cre15.g636650, mRNA: Cre15.g636650, Three_prime_utr: PAC:26898241.three_prime_UTR.1
chr15	489244	SNV	1	G	T	10	33	30.303	0.4	35.9	Gene: Cre15.g636650, mRNA: Cre15.g636650, Three_prime_utr: PAC:26898241.three_prime_UTR.1
chr8	40490	Deletion	1	C	-	13	43	30.2326	0.461538	29.9231	Gene: Cre08.g358459, mRNA: Cre08.g358459, Three_prime_utr: PAC:26887941.three_prime_UTR.1
chr7	4494488	SNV	1	G	A	13	43	30.2326	0.5	35.9286	Gene: g7988, mRNA: g7988	g7988:c.237+378G>A		Dihydrolipoamide succinyltransferase
chr2	476378	SNV	1	A	C	6	20	30	0	36.1667	CDS: Cre02.g076650, Gene: Cre02.g076650, mRNA: Cre02.g076650	Cre02.g076650:c.262A>C	Cre02.g076650:p.Lys88Gln
chr2	476381	SNV	1	A	C	6	20	30	0	35.3333	CDS: Cre02.g076650, Gene: Cre02.g076650, mRNA: Cre02.g076650	Cre02.g076650:c.265A>C	Cre02.g076650:p.Lys89Gln
chr13	4459187	SNV	1	C	G	9	30	30	0.222222	36.7778	CDS: Cre13.g603450, Gene: Cre13.g603450, mRNA: Cre13.g603450	Cre13.g603450:c.46C>G	Cre13.g603450:p.Pro16Ala
chr17	973502	SNV	1	A	G	12	40	30	0.153846	36.6923	CDS: g17045, Gene: g17045, mRNA: g17045	g17045:c.164A>G	g17045:p.His55Arg
chr2	8197726	SNV	1	T	G	6	20	30	0.333333	35.8333	CDS: g2692, Gene: g2692, mRNA: g2692	g2692:c.1360A>C	g2692:p.Met454Leu
chr6	7985339	SNV	1	T	C	6	20	30	0.333333	34	Gene: Cre06.g303800, mRNA: Cre06.g303800	Cre06.g303800:c.901+81A>G
chr8	585599	SNV	1	A	G	6	20	30	0	34.5	Gene: Cre08.g359567, Gene: g8422, mRNA: Cre08.g359567, mRNA: g8422	g8422:c.[1978-332A>G]; Cre08.g359567:c.[1978-335A>G]
chr9	2358557	SNV	1	T	C	6	20	30	0.375	35.75	Gene: Cre09.g392000, Gene: g9452, mRNA: Cre09.g392000, mRNA: g9452	Cre09.g392000:c.[784-329T>C]; g9452:c.[784-329T>C]
chr14	2646318	SNV	1	C	A	21	70	30	0.409091	35.8636	Gene: Cre14.g626300, mRNA: Cre14.g626300, Three_prime_utr: PAC:26890799.three_prime_UTR.1
chr9	5860466	SNV	1	T	C	6	20	30	0.166667	36.5	Gene: g10015, mRNA: g10015	g10015:c.5710-195A>G		Protein kinase superfamily protein
chr11	505481	SNV	1	G	A	6	20	30	0	35.1667	Gene: g11527, mRNA: g11527	g11527:c.700-109C>T		pleiotropic drug resistance 10
chr12	686494	SNV	1	G	C	12	40	30	0.166667	35.6667	Gene: g12114, mRNA: g12114	g12114:c.19-64C>G
chr13	4297293	Deletion	1	G	-	6	20	30	0	35.6667	Gene: g14536, mRNA: g14536	g14536:c.2198-259delG
chr2	2641873	SNV	1	G	A	9	30	30	0.222222	36.8889	Gene: g1755, mRNA: g1755	g1755:c.1204+127G>A
chr17	4961955	SNV	1	T	G	6	20	30	0.166667	32.5	Gene: g17770, mRNA: g17770	g17770:c.657+284T>G		FAD/NAD(P)-binding oxidoreductase family protein
chr17	6341561	SNV	1	G	T	6	20	30	0	36.6667	Gene: g17970, mRNA: g17970	g17970:c.32-37G>T
chr2	3059521	SNV	1	G	A	6	20	30	0.333333	35	Gene: g1822, Five_prime_utr: PAC:26899530.five_prime_UTR.1, mRNA: g1822
chr17	5395171	SNV	1	G	C	11	37	29.7297	0.181818	36.8182	CDS: Cre17.g736650, Gene: Cre17.g736650, mRNA: Cre17.g736650	Cre17.g736650:c.918C>G		Peptidase M1 family protein
chr17	5395170	SNV	1	T	G	11	37	29.7297	0.181818	36.8182	CDS: Cre17.g736650, Gene: Cre17.g736650, mRNA: Cre17.g736650	Cre17.g736650:c.919A>C	Cre17.g736650:p.Ser307Arg
chr16	6741154	Deletion	1	C	-	11	37	29.7297	0.181818	34.9091	CDS: g16707, Gene: g16707, mRNA: g16707	g16707:c.652delG	g16707:p.Gly218fs
chr10	5784759	SNV	1	A	C	22	74	29.7297	0.363636	34.2727	Gene: g11310, mRNA: g11310, Three_prime_utr: PAC:26904797.three_prime_UTR.1
chr12	654802	SNV	1	C	A	11	37	29.7297	0.25	35.25	Gene: g12111, mRNA: g12111	g12111:c.1211+266G>T
chr16	1059386	SNV	1	G	A	11	37	29.7297	0.428571	36.2857	Gene: g15715, mRNA: g15715	g15715:c.1615-1356C>T		cation exchanger 2
scaffold_20	28623	SNV	1	G	A	8	27	29.6296	0.222222	37.4444	CDS: g18154, Gene: g18154, mRNA: g18154	g18154:c.949G>A	g18154:p.Ala317Thr
chr5	2076247	SNV	1	T	A	8	27	29.6296	0.25	36.5	Gene: Cre05.g234600, mRNA: Cre05.g234600	Cre05.g234600:c.3036+78A>T
chr7	2254400	SNV	1	T	C	8	27	29.6296	0.375	34.75	Gene: Cre07.g327500, mRNA: Cre07.g327500	Cre07.g327500:c.362+49A>G
chr15	489249	SNV	1	T	G	8	27	29.6296	0.375	34.375	Gene: Cre15.g636650, mRNA: Cre15.g636650, Three_prime_utr: PAC:26898241.three_prime_UTR.1
chr17	3136295	SNV	1	T	G	8	27	29.6296	0.125	37.375	Gene: Cre17.g721550, Gene: g17457, mRNA: Cre17.g721550, mRNA: g17457	Cre17.g721550:c.[118-83A>C]; g17457:c.[118-83A>C]
chr17	3136296	SNV	1	T	G	8	27	29.6296	0.125	37.375	Gene: Cre17.g721550, Gene: g17457, mRNA: Cre17.g721550, mRNA: g17457	Cre17.g721550:c.[118-84A>C]; g17457:c.[118-84A>C]
chr2	8196771	SNV	1	T	C	8	27	29.6296	0	37.75	Gene: g2692, mRNA: g2692, Three_prime_utr: PAC:26899558.three_prime_UTR.1
chr2	8197214	SNV	1	A	G	8	27	29.6296	0.222222	36.4444	Gene: g2692, mRNA: g2692, Three_prime_utr: PAC:26899558.three_prime_UTR.1
chr14	522265	SNV	1	A	T	53	179	29.6089	0.433962	35.4717	Gene: Cre14.g611450, mRNA: Cre14.g611450, Three_prime_utr: PAC:26890822.three_prime_UTR.1
chr9	635736	SNV	1	T	C	13	44	29.5455	0.307692	35.6154	Gene: Cre09.g403350, mRNA: Cre09.g403350, Three_prime_utr: PAC:26895964.three_prime_UTR.1
scaffold_21	77977	SNV	1	T	A	43	146	29.4521	0.363636	36.0227	Gene: g18174, mRNA: g18174, Three_prime_utr: PAC:26906212.three_prime_UTR.1
chr9	94817	SNV	1	T	C	10	34	29.4118	0.5	37.1	CDS: g9105, Gene: g9105, mRNA: g9105	g9105:c.277T>C	g9105:p.Cys93Arg
chr14	522219	SNV	1	C	T	52	177	29.3785	0.442308	36.6154	Gene: Cre14.g611450, mRNA: Cre14.g611450, Three_prime_utr: PAC:26890822.three_prime_UTR.1
chr8	400987	SNV	1	C	T	17	58	29.3103	0.352941	37.4706	Gene: g8390, mRNA: g8390
chr6	8745645	SNV	1	T	C	12	41	29.2683	0.5	36.2917	CDS: g7170, CDS: Cre06.g309850, Gene: Cre06.g309850, Gene: g7170, mRNA: Cre06.g309850, mRNA: g7170	Cre06.g309850:c.[32A>G]; g7170:c.[116A>G]	Cre06.g309850:p.[Gln11Gly]; g7170:p.[Gln39Gly]
chr6	8745646	SNV	1	G	C	12	41	29.2683	0.5	36.2917	CDS: g7170, CDS: Cre06.g309850, Gene: Cre06.g309850, Gene: g7170, mRNA: Cre06.g309850, mRNA: g7170	Cre06.g309850:c.[31C>G]; g7170:c.[115C>G]	Cre06.g309850:p.[Gln11Gly]; g7170:p.[Gln39Gly]
chr11	8606	SNV	1	A	C	7	24	29.1667	0.142857	38	Gene: g11451, mRNA: g11451, Three_prime_utr: PAC:26890622.three_prime_UTR.1			RNA binding;RNA-directed DNA polymerases
chr3	7122890	SNV	1	G	T	7	24	29.1667	0.285714	37.2143	Gene: g4137, Five_prime_utr: PAC:26902122.five_prime_UTR.1, mRNA: g4137
chr3	7122892	SNV	1	T	G	7	24	29.1667	0.285714	37.2143	Gene: g4137, Five_prime_utr: PAC:26902122.five_prime_UTR.1, mRNA: g4137
chr5	2356356	SNV	1	C	G	7	24	29.1667	0.142857	38.2143	Gene: g5400, Gene: g5401, mRNA: g5400, mRNA: g5401, Three_prime_utr: PAC:26898004.three_prime_UTR.1, Three_prime_utr: PAC:26897704.three_prime_UTR.1
chr6	3948753	SNV	1	G	A	7	24	29.1667	0.142857	33.2857	Gene: g6332, mRNA: g6332	g6332:c.658-154G>A
chr8	3004161	SNV	1	C	T	21	72	29.1667	0	38.4762	Gene: g8777, mRNA: g8777, Three_prime_utr: PAC:26888343.three_prime_UTR.1
chr7	5456193	SNV	1	A	G	9	31	29.0323	0.3	35.6	Gene: Cre07.g350600, mRNA: Cre07.g350600, Three_prime_utr: PAC:26888973.three_prime_UTR.1
chr10	4966092	SNV	1	C	T	9	31	29.0323	0.444444	34.6667	Gene: g11170, mRNA: g11170	g11170:c.239-37G>A
chr15	1467755	SNV	1	G	C	11	38	28.9474	0.454545	34.4545	Gene: g15492, mRNA: g15492	g15492:c.3838-396G>C
chr2	7868171	SNV	1	G	A	13	45	28.8889	0.230769	34.0769	Gene: Cre02.g141700, mRNA: Cre02.g141700	Cre02.g141700:c.1730+1952G>A
chr16	4037959	SNV	1	A	C	15	52	28.8462	0.4	37.6667	CDS: g16226, Gene: g16226, mRNA: g16226	g16226:c.2325A>C
chr17	660637	SNV	1	T	G	19	66	28.7879	0.368421	35.8421	Gene: Cre17.g700600, mRNA: Cre17.g700600
chr11	1441234	SNV	1	T	C	52	181	28.7293	0.446429	35.125	Gene: g11660, mRNA: g11660, mRNA: g11660	g11660:c.1408+58A>G
chr7	2576562	SNV	1	G	C	8	28	28.5714	0	35.25	CDS: Cre07.g329900, Gene: Cre07.g329900, mRNA: Cre07.g329900	Cre07.g329900:c.837G>C		CHASE domain containing histidine kinase protein
chr11	448927	SNV	1	G	A	10	35	28.5714	0.272727	37.6364	CDS: g11519, Gene: g11519, mRNA: g11519	g11519:c.1902C>T
chr12	6732027	SNV	1	C	A	16	56	28.5714	0.470588	37.3529	CDS: g13277, Gene: g13277, mRNA: g13277	g13277:c.285G>T		RNA binding;RNA-directed DNA polymerases
chr12	9189998	SNV	1	T	C	12	42	28.5714	0.166667	36.7917	CDS: g13733, CDS: Cre12.g541950, Gene: Cre12.g541950, Gene: g13733, mRNA: Cre12.g541950, mRNA: g13733	Cre12.g541950:c.[615A>G]; g13733:c.[615A>G]	Cre12.g541950:p.[Leu205Val]; g13733:p.[Leu205Val]
chr12	9190000	SNV	1	G	C	12	42	28.5714	0.166667	36.7917	CDS: g13733, CDS: Cre12.g541950, Gene: Cre12.g541950, Gene: g13733, mRNA: Cre12.g541950, mRNA: g13733	Cre12.g541950:c.[613C>G]; g13733:c.[613C>G]	Cre12.g541950:p.[Leu205Val]; g13733:p.[Leu205Val]
chr9	5405174	SNV	1	T	C	6	21	28.5714	0.166667	35.1667	CDS: g9946, Gene: g9946, mRNA: g9946	g9946:c.906T>C
chr2	2177694	SNV	1	A	G	8	28	28.5714	0.25	36.375	Gene: Cre02.g089600, mRNA: Cre02.g089600	Cre02.g089600:c.662+57T>C
chr4	2331053	SNV	1	C	G	10	35	28.5714	0.5	35.4	Gene: Cre04.g220750, mRNA: Cre04.g220750, Three_prime_utr: PAC:26905548.three_prime_UTR.1
chr5	206267	SNV	1	A	T	6	21	28.5714	0.166667	33.6667	Gene: Cre05.g234100, mRNA: Cre05.g234100	Cre05.g234100:c.1195-66T>A		cytochrome P450, family 97, subfamily A, polypeptide 3
chr6	3143074	Deletion	2	TG	-	6	21	28.5714	0	22.6667	Gene: Cre06.g275350, mRNA: Cre06.g275350	Cre06.g275350:c.1726+76_1726+77delTG		Homeodomain-like superfamily protein
chr9	2358879	Insertion	1	-	T	6	21	28.5714	0.333333	34.8333	Gene: Cre09.g392000, Gene: g9452, mRNA: Cre09.g392000, mRNA: g9452	Cre09.g392000:c.[784-8_784-7insT]; g9452:c.[784-8_784-7insT]
chr9	881819	Insertion	2	-	AC	6	21	28.5714	0.333333	36.25	Gene: Cre09.g401450, mRNA: Cre09.g401450, Three_prime_utr: PAC:26894905.three_prime_UTR.1
chr13	3223357	SNV	1	A	C	6	21	28.5714	0.5	35.3333	Gene: g14375, mRNA: g14375	g14375:c.3018+302T>G		Calcium-dependent lipid-binding (CaLB domain) family protein
scaffold_23	64222	SNV	1	C	A	10	35	28.5714	0.5	35.5	Gene: g18241, mRNA: g18241, Three_prime_utr: PAC:26888798.three_prime_UTR.1
chr15	1430041	SNV	1	C	T	17	60	28.3333	0.294118	35.8627	CDS: g15490, Gene: g15490, mRNA: g15490	g15490:c.76C>T	g15490:p.Arg26*
chr15	1430043	SNV	1	G	A	17	60	28.3333	0.294118	35.8627	CDS: g15490, Gene: g15490, mRNA: g15490	g15490:c.78G>A	g15490:p.Arg26*
chr15	1463855	Deletion	4	GGAC	-	13	46	28.2609	0.0769231	33.1538	Gene: g15492, mRNA: g15492	g15492:c.3837+3643_3837+3646delGGAC
chr16	1803444	SNV	1	A	G	39	138	28.2609	0.25	35.15	Gene: g15841, mRNA: g15841, Three_prime_utr: PAC:26892244.three_prime_UTR.1
chr17	3136334	SNV	1	C	G	11	39	28.2051	0.0909091	35.6364	Gene: Cre17.g721550, Gene: g17457, mRNA: Cre17.g721550, mRNA: g17457	Cre17.g721550:c.[118-122G>C]; g17457:c.[118-122G>C]
scaffold_22	5365	SNV	1	G	A	29	103	28.1553	0	36.1034	Gene: g18200, Five_prime_utr: PAC:26892872.five_prime_UTR.1, mRNA: g18200
chr12	907694	SNV	1	T	C	27	96	28.125	0.275862	35.8966	CDS: g12149, Gene: g12149, mRNA: g12149	g12149:c.3713A>G	g12149:p.Glu1238Gly
chr12	1001791	SNV	1	C	G	9	32	28.125	0.5	34.9	CDS: g12153, Gene: g12153, mRNA: g12153	g12153:c.2709G>C
chr7	3871438	SNV	1	G	C	18	64	28.125	0.35	36.45	Gene: Cre07.g338900, mRNA: Cre07.g338900	Cre07.g338900:c.858+354C>G		CwfJ-like family protein / zinc finger (CCCH-type) family protein
chr7	1910699	SNV	1	A	G	9	32	28.125	0.444444	36.6667	Gene: g7559, mRNA: g7559	g7559:c.320-522A>G
chr4	1075844	SNV	1	G	C	16	57	28.0702	0.4375	36	Gene: Cre04.g216300, mRNA: Cre04.g216300	Cre04.g216300:c.334+486G>C
chr17	2929785	SNV	1	A	G	16	57	28.0702	0.368421	36.4211	Gene: g17423, mRNA: g17423	g17423:c.2888-33T>C
chr4	807806	SNV	1	C	T	23	82	28.0488	0.347826	35.9565	CDS: g4605, CDS: g4605, Gene: g4605, mRNA: g4605, mRNA: g4605	g4605:c.[901G>A];[1204G>A]	g4605:p.[Val301Ile];[Val402Ile]
chr16	4037966	SNV	1	G	T	14	50	28	0.428571	37.1429	CDS: g16226, Gene: g16226, mRNA: g16226	g16226:c.2332G>T	g16226:p.Val778Phe
chr16	4037968	SNV	1	T	C	14	50	28	0.428571	37.1429	CDS: g16226, Gene: g16226, mRNA: g16226	g16226:c.2334T>C	g16226:p.Val778Phe
chr16	6741020	SNV	1	G	A	7	25	28	0	36.2857	CDS: g16707, Gene: g16707, mRNA: g16707	g16707:c.786C>T	g16707:p.His262Arg
chr17	6315172	SNV	1	C	G	7	25	28	0.285714	35.8571	CDS: g17964, Gene: g17964, mRNA: g17964	g17964:c.428G>C	g17964:p.Gly143Ala
chr12	1006620	SNV	1	C	A	7	25	28	0.285714	37.5714	Gene: g12153, mRNA: g12153	g12153:c.187-147G>T
chr14	3540275	SNV	1	T	C	7	25	28	0	36.4286	Gene: g15203, mRNA: g15203, mRNA: g15203	g15203:c.[574-241A>G];[637-241A>G]
chr17	6062355	Deletion	1	G	-	7	25	28	0.285714	29.5714	Gene: g17926, mRNA: g17926, mRNA: g17926, Three_prime_utr: PAC:26896905.three_prime_UTR.1, Three_prime_utr: PAC:26896906.three_prime_UTR.1			Leucine-rich receptor-like protein kinase family protein
chr4	458831	SNV	1	A	G	14	50	28	0.357143	36.0714	Gene: g4556, mRNA: g4556	g4556:c.864+93A>G
scaffold_22	1767	Deletion	3	AAT	-	12	43	27.907	0.333333	31.1667	CDS: g18199, Gene: g18199, mRNA: g18199	g18199:c.76_78delATT	g18199:p.Ile26del
chr2	8062504	SNV	1	C	A	12	43	27.907	0.0833333	36.4167	Gene: g2687, Gene: g2688, mRNA: g2687, mRNA: g2687, mRNA: g2687, mRNA: g2688, mRNA: g2688
chr2	8268716	Deletion	1	G	-	12	43	27.907	0.25	30.75	Gene: g2703, mRNA: g2703	g2703:c.85-95delG
chr4	811905	SNV	1	C	T	22	79	27.8481	0.136364	34.9545	Gene: g4606, mRNA: g4606, Three_prime_utr: PAC:26906172.three_prime_UTR.1
chr4	811906	SNV	1	C	T	22	79	27.8481	0.136364	34.9545	Gene: g4606, mRNA: g4606, Three_prime_utr: PAC:26906172.three_prime_UTR.1
chr8	3258079	SNV	1	G	C	10	36	27.7778	0.1	37.1	Gene: g8806, mRNA: g8806, mRNA: g8806	g8806:c.[8924-1202G>C];[8924-1202G>C]
chr1	1332753	SNV	1	C	G	23	83	27.7108	0.347826	36.3043	CDS: Cre01.g006700, Gene: Cre01.g006700, mRNA: Cre01.g006700	Cre01.g006700:c.311C>G	Cre01.g006700:p.Ala104Gly	RNA binding;RNA-directed DNA polymerases
chr3	8352142	SNV	1	A	C	13	47	27.6596	0.307692	36.6154	Gene: Cre03.g198800, Five_prime_utr: PAC:26902141.five_prime_UTR.2, mRNA: Cre03.g198800
chr11	10914	SNV	1	C	T	8	29	27.5862	0	37.125	CDS: g11451, Gene: g11451, mRNA: g11451	g11451:c.2128G>A	g11451:p.Ala710Thr	RNA binding;RNA-directed DNA polymerases
chr13	1432467	SNV	1	T	C	8	29	27.5862	0.5	35.125	Gene: Cre13.g572100, mRNA: Cre13.g572100, Three_prime_utr: PAC:26898782.three_prime_UTR.1
chr12	872241	SNV	1	G	A	8	29	27.5862	0.375	34.875	Gene: g12146, mRNA: g12146	g12146:c.870-566C>T
chr14	201418	SNV	1	C	T	8	29	27.5862	0.375	35.125	Gene: g14683, mRNA: g14683	g14683:c.445-120G>A
chr4	741757	SNV	1	G	C	11	40	27.5	0.0909091	36.0909	CDS: g4593, Gene: g4593, mRNA: g4593	g4593:c.33G>C
chr8	2233292	SNV	1	C	A	6	22	27.2727	0.166667	33.1667	CDS: Cre08.g369900, Gene: Cre08.g369900, mRNA: Cre08.g369900	Cre08.g369900:c.691C>A	Cre08.g369900:p.Leu231Ile	Protein kinase superfamily protein
chr12	6759147	SNV	1	A	G	6	22	27.2727	0.333333	34	CDS: Cre12.g561750, Gene: Cre12.g561750, mRNA: Cre12.g561750	Cre12.g561750:c.753A>G
chr11	422699	SNV	1	T	C	6	22	27.2727	0.25	37.375	CDS: g11514, Gene: g11514, mRNA: g11514	g11514:c.2019T>C
chr6	5513147	Deletion	1	C	-	6	22	27.2727	0.333333	32	Gene: Cre06.g284850, Gene: g6623, mRNA: Cre06.g284850, mRNA: g6623	Cre06.g284850:c.[1335+60delG]; g6623:c.[1335+60delG]		timeless family protein
chr7	2254395	SNV	1	C	A	6	22	27.2727	0.333333	35	Gene: Cre07.g327500, mRNA: Cre07.g327500	Cre07.g327500:c.362+54G>T
chr7	4448537	Insertion	2	-	CA	6	22	27.2727	0.166667	37.8333	Gene: Cre07.g343200, mRNA: Cre07.g343200	Cre07.g343200:c.4116-33_4116-32insCA
chr8	1381687	SNV	1	T	G	6	22	27.2727	0.166667	33.5	Gene: Cre08.g364050, mRNA: Cre08.g364050	Cre08.g364050:c.605+100A>C		SWITCH/sucrose nonfermenting 3C
chr9	2358549	SNV	1	A	T	6	22	27.2727	0.444444	36.2222	Gene: Cre09.g392000, Gene: g9452, mRNA: Cre09.g392000, mRNA: g9452	Cre09.g392000:c.[783+322A>T]; g9452:c.[783+322A>T]
chr12	5808221	SNV	1	T	C	6	22	27.2727	0	39.6667	Gene: Cre12.g533500, mRNA: Cre12.g533500, Three_prime_utr: PAC:26906359.three_prime_UTR.1
chr13	205746	SNV	1	A	G	6	22	27.2727	0.333333	38	Gene: Cre13.g563500, mRNA: Cre13.g563500	Cre13.g563500:c.1108-25T>C
chr12	686442	SNV	1	G	A	6	22	27.2727	0.5	34.5833	Gene: g12114, mRNA: g12114	g12114:c.19-12C>T
chr12	686443	SNV	1	A	G	6	22	27.2727	0.5	34.5833	Gene: g12114, mRNA: g12114	g12114:c.19-13T>C
chr2	9074428	SNV	1	G	T	9	33	27.2727	0	37.7778	Gene: g2824, mRNA: g2824, Three_prime_utr: PAC:26900537.three_prime_UTR.1
chr4	33936	SNV	1	C	A	6	22	27.2727	0	39.8333	Gene: g4495, mRNA: g4495	g4495:c.1843+380G>T
chr5	2942968	Deletion	1	G	-	9	33	27.2727	0.333333	37.4444	Gene: g5485, mRNA: g5485	g5485:c.1566+181delC
chr7	1910494	SNV	1	T	C	6	22	27.2727	0.333333	37.3333	Gene: g7559, mRNA: g7559	g7559:c.319+508T>C
chr7	4631686	SNV	1	C	T	12	44	27.2727	0.25	34.8333	Gene: g8011, mRNA: g8011, Three_prime_utr: PAC:26889070.three_prime_UTR.1
chr7	4631688	SNV	1	A	G	12	44	27.2727	0.25	34.8333	Gene: g8011, mRNA: g8011, Three_prime_utr: PAC:26889070.three_prime_UTR.1
chr14	2692482	SNV	1	G	C	52	191	27.2251	0.211538	35.875	Gene: g15090, mRNA: g15090	g15090:c.136+116C>G
chr17	4008824	Insertion	1	-	A	10	37	27.027	0.1	36.7	Gene: Cre17.g728950, mRNA: Cre17.g728950	Cre17.g728950:c.698+108_698+109insT
chr6	6373989	SNV	1	G	A	17	63	26.9841	0.176471	34.2941	Gene: g6770, mRNA: g6770, Three_prime_utr: PAC:26894131.three_prime_UTR.1
chr2	7867531	SNV	1	G	A	41	152	26.9737	0.404762	35.9286	Gene: Cre02.g141700, mRNA: Cre02.g141700	Cre02.g141700:c.1730+1312G>A
chr13	3040955	SNV	1	C	T	7	26	26.9231	0.444444	35.6667	CDS: g14346, CDS: g14346, Gene: g14346, mRNA: g14346, mRNA: g14346	g14346:c.[13071G>A];[13983G>A]
chr1	844484	SNV	1	C	T	7	26	26.9231	0.222222	34.3333	Gene: Cre01.g004350, mRNA: Cre01.g004350	Cre01.g004350:c.859-263C>T		Endosomal targeting BRO1-like domain-containing protein
chr2	5660005	SNV	1	T	G	7	26	26.9231	0.428571	35.2857	Gene: Cre02.g109650, mRNA: Cre02.g109650, Three_prime_utr: PAC:26901052.three_prime_UTR.1
chr4	239288	Insertion	2	-	TG	7	26	26.9231	0.285714	36.5714	Gene: Cre04.g217450, mRNA: Cre04.g217450	Cre04.g217450:c.768+111_768+112insTG
chr10	1713401	SNV	1	C	T	14	52	26.9231	0.0714286	37.0714	Gene: Cre10.g430450, mRNA: Cre10.g430450	Cre10.g430450:c.993-220G>A
chr10	5869809	SNV	1	G	A	14	52	26.9231	0.214286	35.7143	Gene: Cre10.g461850, mRNA: Cre10.g461850	Cre10.g461850:c.1487+888G>A
chr16	631988	SNV	1	G	T	7	26	26.9231	0	33.1429	Gene: Cre16.g692000, mRNA: Cre16.g692000, Three_prime_utr: PAC:26891652.three_prime_UTR.1
chr15	1467690	SNV	1	G	C	7	26	26.9231	0.142857	37.1429	Gene: g15492, mRNA: g15492	g15492:c.3838-461G>C
scaffold_21	86181	Insertion	1	-	G	7	26	26.9231	0.142857	35.4286	Gene: g18177, mRNA: g18177, Three_prime_utr: PAC:26906232.three_prime_UTR.1
chr10	1713388	Deletion	1	C	-	11	41	26.8293	0.454545	29.6364	Gene: Cre10.g430450, mRNA: Cre10.g430450	Cre10.g430450:c.993-207delG
chr15	1466301	SNV	1	G	A	11	41	26.8293	0.454545	36.8182	Gene: g15492, mRNA: g15492	g15492:c.3838-1850G>A
scaffold_18	24329	SNV	1	C	T	22	82	26.8293	0.272727	35.6818	Gene: g18081, mRNA: g18081, Three_prime_utr: PAC:26898419.three_prime_UTR.1
scaffold_18	24330	SNV	1	C	T	22	82	26.8293	0.272727	35.6818	Gene: g18081, mRNA: g18081, Three_prime_utr: PAC:26898419.three_prime_UTR.1
chr7	4494482	SNV	1	C	T	11	41	26.8293	0.416667	36.25	Gene: g7988, mRNA: g7988	g7988:c.237+372C>T
chr6	7532838	Insertion	9	-	CCGTTGCAG	8	30	26.6667	0	37.9444	CDS: Cre06.g300650, Gene: Cre06.g300650, mRNA: Cre06.g300650	Cre06.g300650:c.36_37insCCGTTGCAG	Cre06.g300650:p.Gln12_Ala13insProLeuGln	MAK10 homologue
chr16	3943424	SNV	1	T	C	8	30	26.6667	0.25	36	CDS: g16214, Gene: g16214, mRNA: g16214	g16214:c.149T>C	g16214:p.Val50Ala
chr3	8352704	SNV	1	C	G	16	60	26.6667	0.411765	36.1765	Gene: Cre03.g198800, Five_prime_utr: PAC:26902141.five_prime_UTR.1, mRNA: Cre03.g198800
chr17	2929774	Deletion	1	C	-	16	60	26.6667	0.375	34.5	Gene: g17423, mRNA: g17423	g17423:c.2888-22delG
chr2	6618268	SNV	1	A	C	16	60	26.6667	0.294118	37.4706	Gene: g2431, mRNA: g2431, Three_prime_utr: PAC:26900855.three_prime_UTR.2
chr2	8199350	SNV	1	T	G	16	60	26.6667	0.1875	37.0833	Gene: g2692, mRNA: g2692	g2692:c.487+56A>C
chr2	8199352	SNV	1	C	A	16	60	26.6667	0.1875	37.0833	Gene: g2692, mRNA: g2692	g2692:c.487+54G>T
chr12	151115	SNV	1	G	T	47	177	26.5537	0.137255	36.098	Gene: Cre12.g484450, Five_prime_utr: PAC:26906549.five_prime_UTR.1, mRNA: Cre12.g484450
chr2	126540	SNV	1	G	C	22	83	26.506	0.363636	36.2727	Gene: Cre02.g074150, Gene: g1315, mRNA: Cre02.g074150, mRNA: g1315, Three_prime_utr: PAC:26900069.three_prime_UTR.1, Three_prime_utr: PAC:26900068.three_prime_UTR.1			histidine kinase 1
chr12	1001816	SNV	1	A	T	9	34	26.4706	0.5	36	CDS: g12153, Gene: g12153, mRNA: g12153	g12153:c.2684T>A	g12153:p.Leu895Gln
chr4	741765	SNV	1	A	T	9	34	26.4706	0.222222	34.6667	CDS: g4593, Gene: g4593, mRNA: g4593	g4593:c.41A>T	g4593:p.Tyr14Phe
chr15	491073	SNV	1	T	C	10	38	26.3158	0.5	36.7	Gene: g15357, mRNA: g15357	g15357:c.1615-255A>G
chr2	8065977	SNV	1	G	A	20	76	26.3158	0.190476	35.0476	Gene: g2687, Gene: g2688, mRNA: g2687, mRNA: g2687, mRNA: g2687, mRNA: g2688, mRNA: g2688, Three_prime_utr: PAC:26899741.three_prime_UTR.5, Three_prime_utr: PAC:26899742.three_prime_UTR.5
chr2	8979535	SNV	1	G	T	11	42	26.1905	0.272727	35.6364	CDS: g2806, Gene: g2806, mRNA: g2806	g2806:c.1495C>A	g2806:p.Pro499Thr
chr8	585060	SNV	1	G	T	11	42	26.1905	0	39	Gene: Cre08.g359567, Gene: g8422, mRNA: Cre08.g359567, mRNA: g8422	g8422:c.[1977+344G>T]; Cre08.g359567:c.[1977+344G>T]
chr16	3944234	SNV	1	A	C	11	42	26.1905	0.363636	37.1818	Gene: g16214, mRNA: g16214	g16214:c.416+543A>C
chr12	1003306	SNV	1	G	C	6	23	26.087	0	37.1667	CDS: g12153, Gene: g12153, mRNA: g12153	g12153:c.1362C>G
chr6	4606149	SNV	1	C	A	6	23	26.087	0.166667	38.8333	CDS: g6443, Gene: g6443, mRNA: g6443	g6443:c.3028C>A
chr7	3870966	SNV	1	A	G	6	23	26.087	0.333333	35.3333	Gene: Cre07.g338900, mRNA: Cre07.g338900	Cre07.g338900:c.859-260T>C
chr8	564462	SNV	1	A	G	6	23	26.087	0.333333	36.3333	Gene: Cre08.g359450, mRNA: Cre08.g359450	Cre08.g359450:c.994-447T>C
chr9	2358553	SNV	1	G	A	6	23	26.087	0.375	35.125	Gene: Cre09.g392000, Gene: g9452, mRNA: Cre09.g392000, mRNA: g9452	Cre09.g392000:c.[783+326G>A]; g9452:c.[783+326G>A]
chr13	4459350	SNV	1	C	T	6	23	26.087	0.5	34.5833	Gene: Cre13.g603450, mRNA: Cre13.g603450	Cre13.g603450:c.72+137C>T
chr13	4459352	SNV	1	C	G	6	23	26.087	0.5	34.5833	Gene: Cre13.g603450, mRNA: Cre13.g603450	Cre13.g603450:c.72+139C>G
chr9	6941675	SNV	1	T	A	24	92	26.087	0.0416667	33.7917	Gene: g10169, mRNA: g10169, Three_prime_utr: PAC:26895066.three_prime_UTR.1			Homeodomain-like superfamily protein
chr14	3862172	Deletion	2	CA	-	6	23	26.087	0.5	27.6667	Gene: g15250, mRNA: g15250	g15250:c.558+122_558+123delCA		cyclin H;1
chr17	6693226	Deletion	1	G	-	6	23	26.087	0.333333	27.8333	Gene: g17999, mRNA: g17999	g17999:c.4188-20delC		U5 small nuclear ribonucleoprotein helicase, putative
chr6	7030295	Deletion	1	A	-	7	27	25.9259	0.142857	27.5714	Gene: Cre06.g296900, Five_prime_utr: PAC:26894171.five_prime_UTR.1, mRNA: Cre06.g296900
chr9	2365549	SNV	1	G	T	14	54	25.9259	0.466667	35.7333	Gene: Cre09.g392000, Gene: g9452, mRNA: Cre09.g392000, mRNA: g9452	Cre09.g392000:c.[2421+12G>T]; g9452:c.[2421+12G>T]
chr17	3575934	SNV	1	A	T	7	27	25.9259	0.142857	37.7143	Gene: Cre17.g725600, mRNA: Cre17.g725600	Cre17.g725600:c.966+39T>A
chr15	490593	SNV	1	C	G	7	27	25.9259	0	36	Gene: g15357, mRNA: g15357, Three_prime_utr: PAC:26898114.three_prime_UTR.1
chr9	7849713	Deletion	1	C	-	15	58	25.8621	0.4	28.5333	Gene: Cre09.g416750, mRNA: Cre09.g416750, Three_prime_utr: PAC:26895920.three_prime_UTR.1			TCP-1/cpn60 chaperonin family protein
chr3	6839186	SNV	1	A	C	8	31	25.8065	0.375	36.875	CDS: Cre03.g198250, Gene: Cre03.g198250, mRNA: Cre03.g198250	Cre03.g198250:c.207T>G	Cre03.g198250:p.His69Lys
chr3	6839188	SNV	1	G	T	8	31	25.8065	0.375	36.875	CDS: Cre03.g198250, Gene: Cre03.g198250, mRNA: Cre03.g198250	Cre03.g198250:c.205C>A	Cre03.g198250:p.His69Lys
scaffold_22	1793	SNV	1	A	G	8	31	25.8065	0.375	36.125	CDS: g18199, Gene: g18199, mRNA: g18199	g18199:c.52T>C	g18199:p.Tyr18His
chr3	2365409	SNV	1	G	T	8	31	25.8065	0	36.75	Gene: Cre03.g158550, mRNA: Cre03.g158550, Three_prime_utr: PAC:26901740.three_prime_UTR.1			chromatin remodeling factor CHD3 (PICKLE)
chr16	5594806	SNV	1	G	A	8	31	25.8065	0.375	36.375	Gene: Cre16.g679900, mRNA: Cre16.g679900	Cre16.g679900:c.2191-353G>A		5\'-3\' exoribonuclease 3
chr11	68310	Insertion	2	-	TG	8	31	25.8065	0.375	36.8125	Gene: g11459, mRNA: g11459	g11459:c.857-156_857-155insTG
chr2	8064028	SNV	1	A	T	16	62	25.8065	0.1875	35.125	Gene: g2687, Gene: g2688, mRNA: g2687, mRNA: g2687, mRNA: g2687, mRNA: g2688, mRNA: g2688, Three_prime_utr: PAC:26899741.three_prime_UTR.6, Three_prime_utr: PAC:26899742.three_prime_UTR.6
chr2	8205491	SNV	1	C	T	8	31	25.8065	0.222222	36.8889	Gene: g2693, mRNA: g2693	g2693:c.735+304G>A		mitochondrial HSO70 2
chr10	5784770	SNV	1	G	A	17	66	25.7576	0.294118	35.7647	Gene: g11310, mRNA: g11310, Three_prime_utr: PAC:26904797.three_prime_UTR.1
chr3	6839183	SNV	1	G	A	9	35	25.7143	0.444444	35.7778	CDS: Cre03.g198250, Gene: Cre03.g198250, mRNA: Cre03.g198250	Cre03.g198250:c.210C>T
chr9	5082953	SNV	1	T	G	9	35	25.7143	0	37.7778	CDS: g9894, CDS: g9894, Gene: g9894, mRNA: g9894, mRNA: g9894	g9894:c.[297A>C];[297A>C]	g9894:p.[Lys99Asn];[Lys99Asn]
chr13	4016412	SNV	1	C	A	9	35	25.7143	0	36.2222	Gene: g14495, mRNA: g14495	g14495:c.6398+102G>T
chr14	202311	SNV	1	T	G	9	35	25.7143	0.3	34	Gene: g14683, mRNA: g14683	g14683:c.387-102A>C
chr10	5784729	SNV	1	C	A	28	109	25.6881	0.464286	33.8214	Gene: g11310, mRNA: g11310, Three_prime_utr: PAC:26904797.three_prime_UTR.1
chr11	448930	SNV	1	C	T	10	39	25.641	0.272727	37.0909	CDS: g11519, Gene: g11519, mRNA: g11519	g11519:c.1899G>A
chr16	724293	Deletion	1	G	-	20	78	25.641	0.4	33.15	Gene: Cre16.g691177, Gene: g15661, mRNA: Cre16.g691177, mRNA: g15661, Three_prime_utr: PAC:26891746.three_prime_UTR.1, Three_prime_utr: PAC:26891745.three_prime_UTR.1
chr13	2939421	Deletion	1	G	-	11	43	25.5814	0.272727	34.7273	CDS: g14332, Gene: g14332, mRNA: g14332	g14332:c.165delG	g14332:p.Pro55fs
chr16	4037944	SNV	1	T	G	11	43	25.5814	0.363636	38.3636	CDS: g16226, Gene: g16226, mRNA: g16226	g16226:c.2310T>G
chr9	2355725	SNV	1	A	T	55	215	25.5814	0.392857	35.75	Gene: Cre09.g392050, Gene: g9451, Five_prime_utr: PAC:26894993.five_prime_UTR.1, Five_prime_utr: PAC:26894994.five_prime_UTR.1, mRNA: Cre09.g392050, mRNA: g9451
chr9	5078665	SNV	1	A	C	11	43	25.5814	0	35.1818	Gene: g9894, mRNA: g9894, mRNA: g9894, Three_prime_utr: PAC:26895991.three_prime_UTR.3, Three_prime_utr: PAC:26895990.three_prime_UTR.3
chr5	2917148	SNV	1	A	T	12	47	25.5319	0.416667	37.4167	Gene: Cre05.g238140, mRNA: Cre05.g238140, Three_prime_utr: PAC:26897690.three_prime_UTR.1
chr16	3944239	Insertion	3	-	CAA	12	47	25.5319	0.333333	36.25	Gene: g16214, mRNA: g16214	g16214:c.416+547_416+548insCAA
chr7	2576637	SNV	1	A	C	15	59	25.4237	0.2	35	CDS: Cre07.g329900, Gene: Cre07.g329900, mRNA: Cre07.g329900	Cre07.g329900:c.912A>C
chr8	4791852	SNV	1	G	A	17	67	25.3731	0.176471	36.9412	Gene: g9045, mRNA: g9045, mRNA: g9045	g9045:c.[872+620G>A];[872+620G>A]
chr15	314144	Deletion	1	G	-	23	91	25.2747	0.347826	28.1739	Gene: Cre15.g635700, mRNA: Cre15.g635700, Three_prime_utr: PAC:26898163.three_prime_UTR.1			Mitogen activated protein kinase kinase kinase-related
chr2	8063752	SNV	1	C	A	23	91	25.2747	0.208333	35.2083	Gene: g2687, Gene: g2688, mRNA: g2687, mRNA: g2687, mRNA: g2687, mRNA: g2688, mRNA: g2688, Three_prime_utr: PAC:26899741.three_prime_UTR.6, Three_prime_utr: PAC:26899742.three_prime_UTR.6
chr9	302488	SNV	1	G	A	26	103	25.2427	0.192308	33.6923	Gene: g9146, mRNA: g9146, Three_prime_utr: PAC:26895993.three_prime_UTR.1
chr2	8198217	SNV	1	C	A	33	131	25.1908	0.30303	35.2576	CDS: g2692, Gene: g2692, mRNA: g2692	g2692:c.869G>T	g2692:p.Gly290Ile
chr3	6839272	SNV	1	C	T	12	48	25	0.416667	34.8333	CDS: Cre03.g198250, Gene: Cre03.g198250, mRNA: Cre03.g198250	Cre03.g198250:c.121G>A	Cre03.g198250:p.Ala41Thr
chr12	907372	SNV	1	A	G	5	20	25	0.2	37	CDS: g12149, Gene: g12149, mRNA: g12149	g12149:c.4035T>C
chr16	3421827	SNV	1	T	G	6	24	25	0	34.8333	CDS: g16111, Gene: g16111, mRNA: g16111	g16111:c.385T>G	g16111:p.Phe129Val	RNA binding;RNA-directed DNA polymerases
chr16	6741024	SNV	1	G	C	7	28	25	0	36.2857	CDS: g16707, Gene: g16707, mRNA: g16707	g16707:c.782C>G	g16707:p.Pro261Arg
chr2	2642430	SNV	1	A	T	8	32	25	0.375	37.375	CDS: g1755, Gene: g1755, mRNA: g1755	g1755:c.1340A>T	g1755:p.Tyr447Phe
chr17	4596656	SNV	1	C	T	5	20	25	0	35.8	CDS: g17715, Gene: g17715, mRNA: g17715	g17715:c.1497C>T
chr17	6315178	SNV	1	G	T	6	24	25	0.333333	36.3333	CDS: g17964, Gene: g17964, mRNA: g17964	g17964:c.422C>A	g17964:p.Ser141*
scaffold_40	11593	SNV	1	G	A	10	40	25	0.1	36.2	CDS: g18382, Gene: g18382, mRNA: g18382	g18382:c.2232G>A
chr2	8197631	SNV	1	G	A	6	24	25	0.5	38.3333	CDS: g2692, Gene: g2692, mRNA: g2692	g2692:c.1455C>T
chr2	126570	SNV	1	T	C	21	84	25	0.380952	36.381	Gene: Cre02.g074150, Gene: g1315, mRNA: Cre02.g074150, mRNA: g1315, Three_prime_utr: PAC:26900069.three_prime_UTR.1, Three_prime_utr: PAC:26900068.three_prime_UTR.1
chr3	4677447	Deletion	1	G	-	5	20	25	0.2	36.4	Gene: Cre03.g177650, mRNA: Cre03.g177650	Cre03.g177650:c.78+75delG
chr5	2917068	SNV	1	G	A	12	48	25	0.333333	35.5833	Gene: Cre05.g238140, mRNA: Cre05.g238140, Three_prime_utr: PAC:26897690.three_prime_UTR.1
chr5	2917074	SNV	1	T	A	11	44	25	0.272727	36.6364	Gene: Cre05.g238140, mRNA: Cre05.g238140, Three_prime_utr: PAC:26897690.three_prime_UTR.1
chr5	2917075	SNV	1	C	T	11	44	25	0.272727	36.6364	Gene: Cre05.g238140, mRNA: Cre05.g238140, Three_prime_utr: PAC:26897690.three_prime_UTR.1
chr6	5513144	SNV	1	A	C	5	20	25	0.4	34.2	Gene: Cre06.g284850, Gene: g6623, mRNA: Cre06.g284850, mRNA: g6623	Cre06.g284850:c.[1335+63T>G]; g6623:c.[1335+63T>G]
chr8	585648	SNV	1	T	C	6	24	25	0	37	Gene: Cre08.g359567, Gene: g8422, mRNA: Cre08.g359567, mRNA: g8422	g8422:c.[1978-283T>C]; Cre08.g359567:c.[1978-286T>C]
chr8	3404561	SNV	1	C	T	23	92	25	0.347826	34.1304	Gene: Cre08.g374600, mRNA: Cre08.g374600	Cre08.g374600:c.860-203G>A
chr9	2354129	SNV	1	C	T	5	20	25	0.166667	36.5	Gene: Cre09.g392050, Gene: g9451, mRNA: Cre09.g392050, mRNA: g9451	g9451:c.[534+103G>A]; Cre09.g392050:c.[537+103G>A]
chr10	731568	SNV	1	T	G	7	28	25	0.444444	36.8889	Gene: Cre10.g422718, mRNA: Cre10.g422718, Three_prime_utr: PAC:26905019.three_prime_UTR.1
chr12	1686004	SNV	1	A	G	19	76	25	0.5	35.45	Gene: Cre12.g485800, mRNA: Cre12.g485800	Cre12.g485800:c.1397-150T>C
chr12	9444301	Deletion	1	C	-	5	20	25	0.4	32.6	Gene: Cre12.g539650, mRNA: Cre12.g539650, Three_prime_utr: PAC:26907171.three_prime_UTR.1
chr16	891011	SNV	1	G	T	5	20	25	0.4	34.2	Gene: Cre16.g648200, Gene: g15688, mRNA: Cre16.g648200, mRNA: g15688	Cre16.g648200:c.[807+279C>A]; g15688:c.[807+279C>A]
chr17	1966709	Deletion	1	C	-	5	20	25	0	30.6	Gene: Cre17.g710881, mRNA: Cre17.g710881, Three_prime_utr: PAC:26896683.three_prime_UTR.3
chr17	3136327	SNV	1	A	G	9	36	25	0.111111	35.4444	Gene: Cre17.g721550, Gene: g17457, mRNA: Cre17.g721550, mRNA: g17457	Cre17.g721550:c.[118-115T>C]; g17457:c.[118-115T>C]
chr17	3982777	Deletion	1	C	-	5	20	25	0.4	28.2	Gene: Cre17.g728800, mRNA: Cre17.g728800	Cre17.g728800:c.693+7delG		isocitrate dehydrogenase 1
chr17	4884558	Insertion	14	-	GCTTAAGTGCTTAA	8	32	25	0.375	37.2232	Gene: Cre17.g734300, Gene: g17754, Five_prime_utr: PAC:26896986.five_prime_UTR.1, Five_prime_utr: PAC:26896987.five_prime_UTR.1, mRNA: Cre17.g734300, mRNA: g17754			translocon outer complex protein 120
chr12	977445	SNV	1	T	G	5	20	25	0	32	Gene: g12152, mRNA: g12152, mRNA: g12152	g12152:c.[5118-553A>C];[7578-553A>C]
chr12	1007210	SNV	1	A	C	17	68	25	0.352941	36.4706	Gene: g12153, mRNA: g12153	g12153:c.60+45T>G
chr12	1007212	SNV	1	C	G	17	68	25	0.352941	36.4706	Gene: g12153, mRNA: g12153	g12153:c.60+43G>C
chr15	107798	SNV	1	T	C	7	28	25	0.285714	35.5	Gene: g15309, mRNA: g15309, Three_prime_utr: PAC:26898347.three_prime_UTR.1
chr15	107800	SNV	1	A	C	7	28	25	0.285714	35.5	Gene: g15309, mRNA: g15309, Three_prime_utr: PAC:26898347.three_prime_UTR.1
chr15	1432322	SNV	1	T	C	6	24	25	0	34.1667	Gene: g15490, mRNA: g15490, Three_prime_utr: PAC:26898086.three_prime_UTR.1
chr15	1466287	SNV	1	C	T	10	40	25	0.3	37.3	Gene: g15492, mRNA: g15492	g15492:c.3838-1864C>T
chr15	1867998	SNV	1	T	A	5	20	25	0.2	36.8	Gene: g15531, Gene: g15532, mRNA: g15531, mRNA: g15532, Three_prime_utr: PAC:26898088.three_prime_UTR.1, Three_prime_utr: PAC:26898245.three_prime_UTR.1
chr16	3943968	SNV	1	T	C	10	40	25	0	36.6	Gene: g16214, mRNA: g16214	g16214:c.416+277T>C
chr2	8162166	Deletion	4	ACAC	-	6	24	25	0.5	28	Gene: g2688, mRNA: g2688, mRNA: g2688	g2688:c.[1327+168_1327+171delGTGT];[1564+168_1564+171delGTGT]
chr2	8151270	SNV	1	T	G	129	516	25	0.457143	35.3571	Gene: g2688, mRNA: g2688, mRNA: g2688, Three_prime_utr: PAC:26899741.three_prime_UTR.2, Three_prime_utr: PAC:26899742.three_prime_UTR.2
chr4	589193	SNV	1	A	G	7	28	25	0	37	Gene: g4569, mRNA: g4569	g4569:c.1155+37T>C		Galactose oxidase/kelch repeat superfamily protein
chr6	797489	SNV	1	C	T	7	28	25	0.428571	35.4286	Gene: g5714, Five_prime_utr: PAC:26894052.five_prime_UTR.1, mRNA: g5714
chr7	1910383	SNV	1	T	C	5	20	25	0.4	34.4	Gene: g7559, mRNA: g7559	g7559:c.319+397T>C
chr7	3080443	SNV	1	G	A	5	20	25	0.166667	37	Gene: g7759, mRNA: g7759, Three_prime_utr: PAC:26890013.three_prime_UTR.1
chr7	4631708	SNV	1	T	G	12	48	25	0.416667	34	Gene: g8011, mRNA: g8011, Three_prime_utr: PAC:26889070.three_prime_UTR.1
chr7	4631710	SNV	1	C	T	12	48	25	0.416667	34	Gene: g8011, mRNA: g8011, Three_prime_utr: PAC:26889070.three_prime_UTR.1
chr13	3482256	SNV	1	G	T	19	77	24.6753	0.421053	35.5789	Gene: Cre13.g587700, mRNA: Cre13.g587700	Cre13.g587700:c.647+309G>T		NAD(P)-binding Rossmann-fold superfamily protein
chr2	7866995	SNV	1	G	A	49	199	24.6231	0.0612245	35.0816	Gene: Cre02.g141700, mRNA: Cre02.g141700	Cre02.g141700:c.1730+776G>A
chr11	420075	SNV	1	A	G	15	61	24.5902	0.133333	36	Gene: g11514, mRNA: g11514	g11514:c.172-47A>G		protein kinase family protein / protein phosphatase 2C ( PP2C) family protein
chr12	6652894	SNV	1	A	C	26	106	24.5283	0.384615	35.8654	Gene: g13266, mRNA: g13266	g13266:c.22+423T>G
chr12	6652896	SNV	1	A	G	26	106	24.5283	0.384615	35.8654	Gene: g13266, mRNA: g13266	g13266:c.22+421T>C
chr7	2576652	SNV	1	C	G	12	49	24.4898	0.166667	35.8056	CDS: Cre07.g329900, Gene: Cre07.g329900, mRNA: Cre07.g329900	Cre07.g329900:c.927C>G
chr7	2576654	SNV	1	T	C	12	49	24.4898	0.166667	35.8056	CDS: Cre07.g329900, Gene: Cre07.g329900, mRNA: Cre07.g329900	Cre07.g329900:c.929T>C	Cre07.g329900:p.Met310Thr
chr7	2576655	SNV	1	G	A	12	49	24.4898	0.166667	35.8056	CDS: Cre07.g329900, Gene: Cre07.g329900, mRNA: Cre07.g329900	Cre07.g329900:c.930G>A	Cre07.g329900:p.Met310Thr
chr16	3002072	Deletion	1	C	-	24	98	24.4898	0.458333	31.125	Gene: Cre16.g664600, Five_prime_utr: PAC:26892177.five_prime_UTR.1, mRNA: Cre16.g664600
chr17	965436	SNV	1	A	C	12	49	24.4898	0.166667	36.8333	Gene: g17044, mRNA: g17044, Three_prime_utr: PAC:26896860.three_prime_UTR.1
chr4	590598	SNV	1	T	C	12	49	24.4898	0.333333	35.5	Gene: g4569, mRNA: g4569	g4569:c.829+20A>G
chr16	831382	SNV	1	A	G	23	94	24.4681	0.291667	33.2083	Gene: g15677, mRNA: g15677, mRNA: g15677			chromatin remodeling 1
chr9	7436089	SNV	1	G	A	11	45	24.4444	0.454545	34.3636	Gene: g10241, mRNA: g10241	g10241:c.1441+5G>A
scaffold_19	168635	SNV	1	T	A	21	86	24.4186	0.428571	35.381	Gene: g18140, Five_prime_utr: PAC:26892925.five_prime_UTR.1, mRNA: g18140
chr16	724264	SNV	1	G	T	19	78	24.359	0.4	35.2	Gene: Cre16.g691177, Gene: g15661, mRNA: Cre16.g691177, mRNA: g15661, Three_prime_utr: PAC:26891746.three_prime_UTR.1, Three_prime_utr: PAC:26891745.three_prime_UTR.1
chr16	4147942	SNV	1	C	A	9	37	24.3243	0.444444	37.5556	CDS: g16253, CDS: g16253, CDS: g16253, Gene: g16253, mRNA: g16253, mRNA: g16253, mRNA: g16253	g16253:c.[230C>A];[230C>A];[230C>A]	g16253:p.[Thr77Lys];[Thr77Lys];[Thr77Lys]
chr16	4147943	SNV	1	G	A	9	37	24.3243	0.444444	37.5556	CDS: g16253, CDS: g16253, CDS: g16253, Gene: g16253, mRNA: g16253, mRNA: g16253, mRNA: g16253	g16253:c.[231G>A];[231G>A];[231G>A]	g16253:p.[Thr77Lys];[Thr77Lys];[Thr77Lys]
chr13	4458990	SNV	1	T	C	9	37	24.3243	0.111111	37.2222	Gene: Cre13.g603450, Five_prime_utr: PAC:26898659.five_prime_UTR.1, mRNA: Cre13.g603450
chr17	983806	SNV	1	G	A	9	37	24.3243	0.222222	35.3333	Gene: g17047, mRNA: g17047, Three_prime_utr: PAC:26897371.three_prime_UTR.1
scaffold_30	12810	SNV	1	A	G	17	70	24.2857	0.0588235	36.0588	CDS: g18326, Gene: g18326, mRNA: g18326	g18326:c.329T>C	g18326:p.Met110Thr
chr2	8151715	SNV	1	T	G	17	70	24.2857	0.0588235	34.2353	Gene: g2688, mRNA: g2688, mRNA: g2688
chr4	2331060	SNV	1	T	C	8	33	24.2424	0.375	36.25	Gene: Cre04.g220750, mRNA: Cre04.g220750, Three_prime_utr: PAC:26905548.three_prime_UTR.1
chr9	2357768	SNV	1	A	G	8	33	24.2424	0.4	36.2	Gene: Cre09.g392000, Gene: g9452, mRNA: Cre09.g392000, mRNA: g9452	Cre09.g392000:c.[537-6A>G]; g9452:c.[537-6A>G]
chr17	4139293	SNV	1	T	C	8	33	24.2424	0.125	35.875	Gene: Cre17.g729700, mRNA: Cre17.g729700	Cre17.g729700:c.1996-135A>G
chr10	3544279	SNV	1	A	G	7	29	24.1379	0.428571	33.4286	CDS: g10949, Gene: g10949, mRNA: g10949	g10949:c.3687T>C
chr17	3575941	SNV	1	C	A	7	29	24.1379	0.142857	35.8571	Gene: Cre17.g725600, mRNA: Cre17.g725600	Cre17.g725600:c.966+32G>T
chr12	685851	Deletion	3	TCC	-	7	29	24.1379	0.428571	32	Gene: g12114, mRNA: g12114	g12114:c.276+74_276+76delGGA
chr12	906618	SNV	1	C	T	7	29	24.1379	0.142857	34.7143	Gene: g12149, mRNA: g12149	g12149:c.4442-9G>A
chr2	8196819	SNV	1	A	G	7	29	24.1379	0	36.4286	Gene: g2692, mRNA: g2692, Three_prime_utr: PAC:26899558.three_prime_UTR.1
chr5	161552	SNV	1	G	T	7	29	24.1379	0	34.1429	Gene: g5084, mRNA: g5084, Three_prime_utr: PAC:26897863.three_prime_UTR.1
chr5	161604	SNV	1	C	A	7	29	24.1379	0.285714	36.1429	Gene: g5084, mRNA: g5084, Three_prime_utr: PAC:26897863.three_prime_UTR.1
chr9	2355713	SNV	1	C	G	51	212	24.0566	0.365385	36.0192	Gene: Cre09.g392050, Gene: g9451, Five_prime_utr: PAC:26894993.five_prime_UTR.1, Five_prime_utr: PAC:26894994.five_prime_UTR.1, mRNA: Cre09.g392050, mRNA: g9451
chr2	7868076	SNV	1	C	A	44	183	24.0437	0.363636	35.4318	Gene: Cre02.g141700, mRNA: Cre02.g141700	Cre02.g141700:c.1730+1857C>A
chr2	7868302	SNV	1	T	G	37	154	24.026	0.432432	36.1081	Gene: Cre02.g141700, mRNA: Cre02.g141700	Cre02.g141700:c.1731-2054T>G
chr7	2576544	SNV	1	G	C	6	25	24	0	34.6667	CDS: Cre07.g329900, Gene: Cre07.g329900, mRNA: Cre07.g329900	Cre07.g329900:c.819G>C
chr7	4385743	SNV	1	G	T	6	25	24	0.333333	37	CDS: Cre07.g341100, CDS: g7973, Gene: Cre07.g341100, Gene: g7973, mRNA: Cre07.g341100, mRNA: g7973	Cre07.g341100:c.[193G>T]; g7973:c.[193G>T]	Cre07.g341100:p.[Ala65Ser]; g7973:p.[Ala65Ser]
chr15	1430329	SNV	1	T	A	6	25	24	0.5	36.6667	Gene: g15490, mRNA: g15490, Three_prime_utr: PAC:26898086.three_prime_UTR.1
chr5	2943029	Insertion	1	-	G	6	25	24	0	38.8333	Gene: g5485, mRNA: g5485	g5485:c.1566+120_1566+121insC
chr5	2943049	Insertion	1	-	G	6	25	24	0	36.5	Gene: g5485, mRNA: g5485	g5485:c.1566+100_1566+101insC
chr9	4976308	Deletion	2	GT	-	6	25	24	0.166667	27.1667	Gene: g9878, mRNA: g9878	g9878:c.1231-36_1231-35delAC		exostosin family protein
chr6	2217217	Insertion	1	-	T	35	146	23.9726	0.371429	35.9143	Gene: g5976, mRNA: g5976, Three_prime_utr: PAC:26893703.three_prime_UTR.1			Protein kinase superfamily protein with octicosapeptide/Phox/Bem1p domain
chr9	636197	SNV	1	A	G	17	71	23.9437	0.470588	33.8235	Gene: Cre09.g403350, mRNA: Cre09.g403350, Three_prime_utr: PAC:26895964.three_prime_UTR.1
chr2	1848599	Insertion	2	-	TG	11	46	23.913	0.454545	36.3182	Gene: Cre02.g087300, mRNA: Cre02.g087300	Cre02.g087300:c.423-4_423-3insTG		D-isomer specific 2-hydroxyacid dehydrogenase family protein
chr9	635420	SNV	1	C	T	11	46	23.913	0.5	36.3333	Gene: Cre09.g403350, mRNA: Cre09.g403350, Three_prime_utr: PAC:26895964.three_prime_UTR.1
chr9	3384418	SNV	1	G	A	11	46	23.913	0.181818	34.5455	Gene: g9624, mRNA: g9624	g9624:c.1171-297C>T		RNI-like superfamily protein
chr2	2342930	SNV	1	G	T	5	21	23.8095	0	33.4	CDS: Cre02.g090850, Gene: Cre02.g090850, mRNA: Cre02.g090850	Cre02.g090850:c.915G>T		casein lytic proteinase B3
chr9	7436046	SNV	1	A	C	5	21	23.8095	0.5	36.5	CDS: g10241, Gene: g10241, mRNA: g10241	g10241:c.1403A>C	g10241:p.Tyr468Ser
chr4	741744	SNV	1	A	G	10	42	23.8095	0	37.2	CDS: g4593, Gene: g4593, mRNA: g4593	g4593:c.20A>G	g4593:p.Glu7Gly
chr4	741671	SNV	1	C	A	5	21	23.8095	0.4	35.3	CDS: g4593, Gene: g4593, mRNA: g4593	g4593:c.16C>A	g4593:p.His6Thr
chr4	741672	SNV	1	A	C	5	21	23.8095	0.4	35.3	CDS: g4593, Gene: g4593, mRNA: g4593	g4593:c.17A>C	g4593:p.His6Thr
chr6	4606167	SNV	1	C	T	5	21	23.8095	0.2	38.8	CDS: g6443, Gene: g6443, mRNA: g6443	g6443:c.3046C>T
chr1	6667384	Deletion	1	C	-	5	21	23.8095	0.2	30.8	Gene: Cre01.g047850, mRNA: Cre01.g047850	Cre01.g047850:c.352+32delG		Pyridoxal phosphate (PLP)-dependent transferases superfamily protein
chr6	6333935	Deletion	2	TG	-	5	21	23.8095	0.4	32.2	Gene: Cre06.g291900, mRNA: Cre06.g291900	Cre06.g291900:c.538-96_538-95delTG		Thioredoxin superfamily protein
chr8	564456	SNV	1	G	A	5	21	23.8095	0.4	38	Gene: Cre08.g359450, mRNA: Cre08.g359450	Cre08.g359450:c.994-441C>T
chr12	7893142	Deletion	2	GT	-	5	21	23.8095	0	31.6	Gene: Cre12.g552700, mRNA: Cre12.g552700	Cre12.g552700:c.3174+99_3174+100delGT		Arabidopsis phospholipase-like protein (PEARLI 4) family
chr16	2703186	Deletion	2	AC	-	5	21	23.8095	0.2	28.6	Gene: Cre16.g662350, mRNA: Cre16.g662350	Cre16.g662350:c.3892-91_3892-90delAC		trehalose-6-phosphate synthase
chr16	5321743	Deletion	2	CA	-	5	21	23.8095	0.4	27.4	Gene: Cre16.g682200, mRNA: Cre16.g682200	Cre16.g682200:c.255+48_255+49delTG		late embryogenesis abundant domain-containing protein / LEA domain-containing protein
chr17	3052887	Deletion	1	G	-	5	21	23.8095	0.4	28.8	Gene: Cre17.g720700, Gene: g17442, mRNA: Cre17.g720700, mRNA: g17442	g17442:c.[1816-68delC]; Cre17.g720700:c.[1816-68delC]		ankyrin repeat family protein
chr17	3890701	Deletion	2	CA	-	5	21	23.8095	0.4	24.4	Gene: Cre17.g728250, mRNA: Cre17.g728250	Cre17.g728250:c.399+32_399+33delTG		calcium-dependent lipid-binding family protein
chr11	505459	SNV	1	G	A	5	21	23.8095	0	35	Gene: g11527, mRNA: g11527	g11527:c.700-87C>T
chr12	901497	SNV	1	T	C	15	63	23.8095	0.466667	36.4667	Gene: g12148, mRNA: g12148, Three_prime_utr: PAC:26907483.three_prime_UTR.1
chr12	978175	SNV	1	A	G	15	63	23.8095	0.333333	36.7333	Gene: g12152, mRNA: g12152, mRNA: g12152	g12152:c.[5117+118T>C];[7577+118T>C]
chr15	1467714	SNV	1	C	T	5	21	23.8095	0.2	37	Gene: g15492, mRNA: g15492	g15492:c.3838-437C>T
chr3	6810602	SNV	1	C	A	5	21	23.8095	0.4	34	Gene: g4107, mRNA: g4107	g4107:c.129-251C>A
chr4	33884	SNV	1	T	G	5	21	23.8095	0	33.8	Gene: g4495, mRNA: g4495	g4495:c.1843+432A>C
chr16	4037926	SNV	1	C	G	9	38	23.6842	0.444444	36.2222	CDS: g16226, Gene: g16226, mRNA: g16226	g16226:c.2292C>G
chr16	4037927	SNV	1	G	T	9	38	23.6842	0.444444	36.2222	CDS: g16226, Gene: g16226, mRNA: g16226	g16226:c.2293G>T	g16226:p.Asp765Tyr
chr17	789435	SNV	1	G	A	9	38	23.6842	0.444444	36	CDS: g17012, Gene: g17012, mRNA: g17012	g17012:c.957G>A	g17012:p.Trp319*
chr2	8979511	SNV	1	G	C	9	38	23.6842	0.333333	36.7778	CDS: g2806, Gene: g2806, mRNA: g2806	g2806:c.1519C>G	g2806:p.Leu507Val
chr17	3136316	Deletion	1	G	-	9	38	23.6842	0.111111	36.2222	Gene: Cre17.g721550, Gene: g17457, mRNA: Cre17.g721550, mRNA: g17457	Cre17.g721550:c.[118-104delC]; g17457:c.[118-104delC]
chr15	111520	Deletion	1	G	-	9	38	23.6842	0.444444	31.5556	Gene: g15310, mRNA: g15310, Three_prime_utr: PAC:26898246.three_prime_UTR.1
chr15	1429100	Deletion	1	A	-	9	38	23.6842	0.444444	30.1111	Gene: g15490, mRNA: g15490
chr4	2305096	SNV	1	G	A	22	93	23.6559	0.347826	35.8261	Gene: g4809, Five_prime_utr: PAC:26905718.five_prime_UTR.1, mRNA: g4809
chr5	2917124	Deletion	1	C	-	13	55	23.6364	0.384615	37.6154	Gene: Cre05.g238140, mRNA: Cre05.g238140, Three_prime_utr: PAC:26897690.three_prime_UTR.1
chr9	953668	SNV	1	G	A	13	55	23.6364	0.307692	36.9231	Gene: Cre09.g400900, mRNA: Cre09.g400900, Three_prime_utr: PAC:26895233.three_prime_UTR.1
chr14	522116	SNV	1	T	G	13	55	23.6364	0.153846	35.4615	Gene: Cre14.g611450, mRNA: Cre14.g611450, Three_prime_utr: PAC:26890822.three_prime_UTR.1
chr14	2692032	SNV	1	A	T	30	127	23.622	0.433333	36.1	Gene: g15090, mRNA: g15090	g15090:c.195-58T>A
chr16	392722	SNV	1	C	T	17	72	23.6111	0.352941	36.1765	Gene: g15606, Gene: Cre16.g693600, mRNA: g15606, mRNA: Cre16.g693600, Three_prime_utr: PAC:26891548.three_prime_UTR.1, Three_prime_utr: PAC:26891547.three_prime_UTR.1
chr2	8067585	SNV	1	T	C	84	356	23.5955	0.384615	34.9451	Gene: g2687, Gene: g2688, mRNA: g2687, mRNA: g2687, mRNA: g2687, mRNA: g2688, mRNA: g2688, Three_prime_utr: PAC:26899741.three_prime_UTR.3, Three_prime_utr: PAC:26899742.three_prime_UTR.3
chr5	2917190	SNV	1	A	T	8	34	23.5294	0.375	36	Gene: Cre05.g238140, mRNA: Cre05.g238140, Three_prime_utr: PAC:26897690.three_prime_UTR.1
chr5	2941960	SNV	1	C	T	8	34	23.5294	0.444444	36.8889	Gene: g5485, mRNA: g5485	g5485:c.1567-687G>A
chr12	684031	SNV	1	C	A	11	47	23.4043	0.454545	36.8182	CDS: g12114, Gene: g12114, mRNA: g12114	g12114:c.1725G>T		phosphate transporter 2;1
chr8	3522475	SNV	1	A	C	11	47	23.4043	0.272727	34.4545	Gene: Cre08.g375200, Gene: g8840, mRNA: Cre08.g375200, mRNA: g8840	Cre08.g375200:c.[904-633A>C]; g8840:c.[904-633A>C]
chr4	3873184	Insertion	4	-	GTAT	11	47	23.4043	0.272727	37.75	Gene: g5041, mRNA: g5041, Three_prime_utr: PAC:26906141.three_prime_UTR.1
scaffold_19	168622	Deletion	1	C	-	18	77	23.3766	0.444444	30.1111	Gene: g18140, Five_prime_utr: PAC:26892925.five_prime_UTR.1, mRNA: g18140
chr6	8815187	SNV	1	T	C	7	30	23.3333	0.285714	33.8571	CDS: Cre06.g310250, Gene: Cre06.g310250, mRNA: Cre06.g310250	Cre06.g310250:c.229A>G	Cre06.g310250:p.Thr77Ala
chr7	2576553	SNV	1	T	C	7	30	23.3333	0	34.8571	CDS: Cre07.g329900, Gene: Cre07.g329900, mRNA: Cre07.g329900	Cre07.g329900:c.828T>C
chr15	1429978	SNV	1	C	T	14	60	23.3333	0.428571	35.8571	CDS: g15490, Gene: g15490, mRNA: g15490	g15490:c.13C>T	g15490:p.Arg5*
chr14	3540297	SNV	1	A	C	7	30	23.3333	0	38.4286	Gene: g15203, mRNA: g15203, mRNA: g15203	g15203:c.[574-263T>G];[637-263T>G]
chr2	9074375	SNV	1	A	T	7	30	23.3333	0.285714	36.7143	Gene: g2824, mRNA: g2824, Three_prime_utr: PAC:26900537.three_prime_UTR.1
chr3	9176183	SNV	1	G	A	7	30	23.3333	0	33.7143	Gene: g4483, mRNA: g4483	g4483:c.412-199C>T		Protein of unknown function DUF455
chr5	2941969	Deletion	1	G	-	7	30	23.3333	0.285714	35.1429	Gene: g5485, mRNA: g5485	g5485:c.1567-696delC
chr6	3507806	SNV	1	G	A	7	30	23.3333	0.285714	35.8571	Gene: g6249, mRNA: g6249	g6249:c.93+46C>T
chr12	377590	SNV	1	T	A	10	43	23.2558	0.4	33.2	Gene: Cre12.g494100, mRNA: Cre12.g494100, Three_prime_utr: PAC:26908129.three_prime_UTR.2			splicing factor, putative
chr17	3574709	SNV	1	C	T	10	43	23.2558	0.3	35.5	Gene: Cre17.g725600, mRNA: Cre17.g725600	Cre17.g725600:c.1394+93G>A
chr2	9026398	SNV	1	C	A	10	43	23.2558	0.2	34.8	Gene: g2816, mRNA: g2816, Three_prime_utr: PAC:26900232.three_prime_UTR.1
chr5	162454	SNV	1	T	C	10	43	23.2558	0	38.2	Gene: g5084, mRNA: g5084, Three_prime_utr: PAC:26897863.three_prime_UTR.1
chr6	4698794	Deletion	1	C	-	10	43	23.2558	0.2	27.9	Gene: g6450, mRNA: g6450, Three_prime_utr: PAC:26894554.three_prime_UTR.1
chr12	9189865	SNV	1	C	T	16	69	23.1884	0.0625	36.9375	CDS: g13733, CDS: Cre12.g541950, Gene: Cre12.g541950, Gene: g13733, mRNA: Cre12.g541950, mRNA: g13733	Cre12.g541950:c.[748G>A]; g13733:c.[748G>A]	Cre12.g541950:p.[Glu250Lys]; g13733:p.[Glu250Lys]
chr11	448876	SNV	1	G	C	6	26	23.0769	0.333333	35.6667	CDS: g11519, Gene: g11519, mRNA: g11519	g11519:c.1953C>G
chr11	715626	SNV	1	G	A	6	26	23.0769	0	37.6667	CDS: g11558, Gene: g11558, mRNA: g11558	g11558:c.4C>T	g11558:p.Leu2Phe
chr12	683995	SNV	1	T	C	12	52	23.0769	0.416667	36	CDS: g12114, Gene: g12114, mRNA: g12114	g12114:c.1761A>G
chr15	490792	SNV	1	T	C	6	26	23.0769	0.285714	36.4286	CDS: g15357, Gene: g15357, mRNA: g15357	g15357:c.1641A>G
chr2	8197448	SNV	1	A	G	15	65	23.0769	0.375	35.9375	CDS: g2692, Gene: g2692, mRNA: g2692	g2692:c.1638T>C
chr1	2398887	Deletion	2	GT	-	9	39	23.0769	0.333333	32.4444	Gene: Cre01.g013250, mRNA: Cre01.g013250	Cre01.g013250:c.892+149_892+150delAC		hydrolase family protein / HAD-superfamily protein
chr8	4650971	SNV	1	T	C	6	26	23.0769	0.166667	35.5	Gene: Cre08.g383550, mRNA: Cre08.g383550	Cre08.g383550:c.1475-525T>C		XB3 ortholog 1 in Arabidopsis thaliana
chr13	4459007	SNV	1	T	G	9	39	23.0769	0.111111	36.4444	Gene: Cre13.g603450, Five_prime_utr: PAC:26898659.five_prime_UTR.1, mRNA: Cre13.g603450
chr14	522207	SNV	1	A	G	30	130	23.0769	0.4	35.6667	Gene: Cre14.g611450, mRNA: Cre14.g611450, Three_prime_utr: PAC:26890822.three_prime_UTR.1
chr16	1382238	SNV	1	T	A	9	39	23.0769	0.4	33	Gene: Cre16.g652050, mRNA: Cre16.g652050	Cre16.g652050:c.905-195A>T		FAD/NAD(P)-binding oxidoreductase family protein
chr2	287916	Insertion	2	-	GT	6	26	23.0769	0	36.5833	Gene: g1343, mRNA: g1343, mRNA: g1343	g1343:c.[672+57_672+58insGT];[672+57_672+58insGT]		Tetratricopeptide repeat (TPR)-like superfamily protein
chr6	4602859	SNV	1	G	A	6	26	23.0769	0.166667	35.5	Gene: g6443, mRNA: g6443	g6443:c.8-46G>A
chr8	347953	SNV	1	C	T	20	87	22.9885	0.35	33.3	Gene: g8386, mRNA: g8386, Three_prime_utr: PAC:26888474.three_prime_UTR.1
chr6	600918	SNV	1	T	G	11	48	22.9167	0	34.8182	Gene: Cre06.g253250, mRNA: Cre06.g253250, Three_prime_utr: PAC:26893651.three_prime_UTR.1
chr14	522111	SNV	1	T	C	11	48	22.9167	0	35.1818	Gene: Cre14.g611450, mRNA: Cre14.g611450, Three_prime_utr: PAC:26890822.three_prime_UTR.1
chr6	6907202	SNV	1	T	C	8	35	22.8571	0	38.375	CDS: g6845, Gene: g6845, mRNA: g6845	g6845:c.1491T>C
chr11	2525682	SNV	1	C	T	8	35	22.8571	0.125	34.625	Gene: Cre11.g475950, Gene: g11822, mRNA: Cre11.g475950, mRNA: g11822	Cre11.g475950:c.[7307-404C>T]; g11822:c.[7307-404C>T]		SET domain protein 25
chr13	797678	Insertion	4	-	GCCG	8	35	22.8571	0.25	35.6562	Gene: Cre13.g567050, mRNA: Cre13.g567050, Three_prime_utr: PAC:26898845.three_prime_UTR.1
chr15	1455489	SNV	1	G	A	8	35	22.8571	0.25	36.375	Gene: g15491, Five_prime_utr: PAC:26898349.five_prime_UTR.1, mRNA: g15491
chr2	8267987	Deletion	1	T	-	8	35	22.8571	0.375	34.75	Gene: g2703, mRNA: g2703	g2703:c.42-20delT
chr1	649391	SNV	1	C	T	8	35	22.8571	0	35	Gene: g85, mRNA: g85	g85:c.1725+540C>T
chr11	431066	SNV	1	G	C	21	92	22.8261	0.0454545	37.7273	Gene: g11516, Five_prime_utr: PAC:26890377.five_prime_UTR.1, mRNA: g11516			protein kinase family protein / protein phosphatase 2C ( PP2C) family protein
chr17	3576687	SNV	1	G	T	5	22	22.7273	0	34.4	CDS: Cre17.g725600, Gene: Cre17.g725600, mRNA: Cre17.g725600	Cre17.g725600:c.559C>A	Cre17.g725600:p.His187Asn
chr3	2456707	Deletion	2	TG	-	5	22	22.7273	0.4	27.2	Gene: Cre03.g159350, mRNA: Cre03.g159350, Three_prime_utr: PAC:26902380.three_prime_UTR.1			Transducin/WD40 repeat-like superfamily protein
chr13	16327	SNV	1	T	G	5	22	22.7273	0	34	Gene: Cre13.g561800, mRNA: Cre13.g561800	Cre13.g561800:c.2661-215A>C
chr12	977451	SNV	1	G	A	5	22	22.7273	0	32.8	Gene: g12152, mRNA: g12152, mRNA: g12152	g12152:c.[5118-559C>T];[7578-559C>T]
chr16	3735010	SNV	1	T	C	5	22	22.7273	0	37	Gene: g16176, mRNA: g16176	g16176:c.1234-62A>G		acyl-CoA oxidase 5
scaffold_44	5578	SNV	1	A	G	5	22	22.7273	0.4	38	Gene: g18392, Three_prime_utr: PAC:26892952.three_prime_UTR.1, mRNA: g18392
chr3	4961948	Deletion	2	CA	-	5	22	22.7273	0.4	35.4	Gene: g3729, mRNA: g3729	g3729:c.2901+10_2901+11delTG		DNA polymerase epsilon catalytic subunit
chr5	2941900	Deletion	1	G	-	10	44	22.7273	0.4	34.9	Gene: g5485, mRNA: g5485	g5485:c.1567-627delC
chr7	2002701	SNV	1	G	A	5	22	22.7273	0.4	32	Gene: g7573, mRNA: g7573	g7573:c.3856+93C>T		Protein kinase superfamily protein
scaffold_22	5318	SNV	1	A	T	17	75	22.6667	0	37.5882	Gene: g18200, Five_prime_utr: PAC:26892872.five_prime_UTR.1, mRNA: g18200
chr6	8815152	SNV	1	A	T	12	53	22.6415	0.0833333	34.4167	CDS: Cre06.g310250, Gene: Cre06.g310250, mRNA: Cre06.g310250	Cre06.g310250:c.264T>A
chr11	1439508	SNV	1	A	G	38	168	22.619	0.475	35.25	Gene: g11660, mRNA: g11660, mRNA: g11660
chr12	1943723	SNV	1	T	A	7	31	22.5806	0.142857	33.8571	Gene: Cre12.g510550, mRNA: Cre12.g510550	Cre12.g510550:c.2220+152A>T		SET domain protein 35
chr17	6005375	Insertion	1	-	G	7	31	22.5806	0.285714	36.5714	Gene: Cre17.g740650, mRNA: Cre17.g740650	Cre17.g740650:c.2063-39_2063-38insG
chr16	3944238	SNV	1	G	A	7	31	22.5806	0.285714	37.2857	Gene: g16214, mRNA: g16214	g16214:c.416+547G>A
chr5	2942346	Deletion	1	G	-	7	31	22.5806	0.285714	38.4286	Gene: g5485, mRNA: g5485	g5485:c.1566+803delC
chr6	3507812	SNV	1	C	T	7	31	22.5806	0.285714	34.1429	Gene: g6249, mRNA: g6249	g6249:c.93+40G>A
chr7	4494502	SNV	1	G	A	9	40	22.5	0.333333	36.3333	Gene: g7988, mRNA: g7988	g7988:c.237+392G>A
chr2	7868274	SNV	1	C	T	31	138	22.4638	0.387097	35.7258	Gene: Cre02.g141700, mRNA: Cre02.g141700	Cre02.g141700:c.1730+2055C>T
chr8	3522453	SNV	1	T	C	11	49	22.449	0.363636	34.2727	Gene: Cre08.g375200, Gene: g8840, mRNA: Cre08.g375200, mRNA: g8840	Cre08.g375200:c.[904-655T>C]; g8840:c.[904-655T>C]
chr11	1439827	SNV	1	T	G	88	392	22.449	0.466667	36.3889	Gene: g11660, mRNA: g11660, mRNA: g11660, Three_prime_utr: PAC:26890097.three_prime_UTR.3, Three_prime_utr: PAC:26890099.three_prime_UTR.3
chr2	8197082	SNV	1	T	G	13	58	22.4138	0.428571	36.9286	Gene: g2692, mRNA: g2692, Three_prime_utr: PAC:26899558.three_prime_UTR.1
chr9	5457026	SNV	1	A	T	13	58	22.4138	0.461538	35.3077	Gene: g9954, Five_prime_utr: PAC:26895896.five_prime_UTR.1, mRNA: g9954
chr2	8061966	SNV	1	C	T	54	241	22.4066	0.37931	36.1034	Gene: g2687, Gene: g2688, mRNA: g2687, mRNA: g2687, mRNA: g2687, mRNA: g2688, mRNA: g2688, Three_prime_utr: PAC:26899741.three_prime_UTR.8, Three_prime_utr: PAC:26899742.three_prime_UTR.8
chr2	7868243	SNV	1	G	A	23	103	22.3301	0.434783	35.5652	Gene: Cre02.g141700, mRNA: Cre02.g141700	Cre02.g141700:c.1730+2024G>A
chr2	8066987	SNV	1	G	T	77	345	22.3188	0.454545	36.526	Gene: g2687, Gene: g2688, mRNA: g2687, mRNA: g2687, mRNA: g2687, mRNA: g2688, mRNA: g2688, Three_prime_utr: PAC:26899741.three_prime_UTR.4, Three_prime_utr: PAC:26899742.three_prime_UTR.4
chr2	8066988	SNV	1	T	C	77	345	22.3188	0.454545	36.526	Gene: g2687, Gene: g2688, mRNA: g2687, mRNA: g2687, mRNA: g2687, mRNA: g2688, mRNA: g2688, Three_prime_utr: PAC:26899741.three_prime_UTR.4, Three_prime_utr: PAC:26899742.three_prime_UTR.4
chr2	8067341	SNV	1	C	T	29	130	22.3077	0.225806	35.3548	Gene: g2687, Gene: g2688, mRNA: g2687, mRNA: g2687, mRNA: g2687, mRNA: g2688, mRNA: g2688
chr6	981126	SNV	1	T	C	10	45	22.2222	0.454545	34.9091	CDS: Cre06.g255750, Gene: Cre06.g255750, mRNA: Cre06.g255750	Cre06.g255750:c.59A>G	Cre06.g255750:p.Asn20Ser
chr16	3785779	SNV	1	G	C	14	63	22.2222	0.266667	35.5333	CDS: g16184, Gene: g16184, mRNA: g16184	g16184:c.2313C>G
chr17	789404	SNV	1	C	T	8	36	22.2222	0.5	36.75	CDS: g17012, Gene: g17012, mRNA: g17012	g17012:c.926C>T	g17012:p.Ala309Val
chr2	8268045	SNV	1	T	C	8	36	22.2222	0.222222	36.1111	CDS: g2703, Gene: g2703, mRNA: g2703	g2703:c.80T>C	g2703:p.Leu27Pro
chr4	589236	SNV	1	A	G	8	36	22.2222	0.125	37.25	CDS: g4569, Gene: g4569, mRNA: g4569	g4569:c.1149T>C		Galactose oxidase/kelch repeat superfamily protein
chr4	823261	SNV	1	C	T	8	36	22.2222	0.25	37.625	CDS: g4610, Gene: g4610, mRNA: g4610	g4610:c.162C>T
chr1	3954125	Deletion	2	GT	-	8	36	22.2222	0.25	34.25	Gene: Cre01.g025750, mRNA: Cre01.g025750	Cre01.g025750:c.312-140_312-139delAC
chr8	4651053	Deletion	2	TA	-	6	27	22.2222	0	33.8333	Gene: Cre08.g383550, mRNA: Cre08.g383550	Cre08.g383550:c.1475-443_1475-442delTA
chr9	2356335	SNV	1	G	T	14	63	22.2222	0.266667	35.0667	Gene: Cre09.g392000, Gene: g9452, mRNA: Cre09.g392000, mRNA: g9452	Cre09.g392000:c.[153+96G>T]; g9452:c.[153+96G>T]
chr10	3956430	SNV	1	T	C	6	27	22.2222	0	33.1667	Gene: Cre10.g448550, mRNA: Cre10.g448550, Three_prime_utr: PAC:26904814.three_prime_UTR.1
chr12	377580	SNV	1	G	A	8	36	22.2222	0.375	33.625	Gene: Cre12.g494100, mRNA: Cre12.g494100, Three_prime_utr: PAC:26908129.three_prime_UTR.2
chr17	3575917	SNV	1	T	C	6	27	22.2222	0	35.5833	Gene: Cre17.g725600, mRNA: Cre17.g725600	Cre17.g725600:c.966+56A>G
chr17	3575918	SNV	1	C	T	6	27	22.2222	0	35.5833	Gene: Cre17.g725600, mRNA: Cre17.g725600	Cre17.g725600:c.966+55G>A
chr17	6005376	SNV	1	T	G	6	27	22.2222	0.333333	37.5	Gene: Cre17.g740650, mRNA: Cre17.g740650	Cre17.g740650:c.2063-37T>G
chr17	6005378	SNV	1	T	G	6	27	22.2222	0.333333	37.5	Gene: Cre17.g740650, mRNA: Cre17.g740650	Cre17.g740650:c.2063-35T>G
chr15	1432207	SNV	1	A	G	8	36	22.2222	0.125	35.375	Gene: g15490, mRNA: g15490, Three_prime_utr: PAC:26898086.three_prime_UTR.1
chr15	1455548	SNV	1	T	C	8	36	22.2222	0	37.5	Gene: g15491, Five_prime_utr: PAC:26898349.five_prime_UTR.1, mRNA: g15491
scaffold_21	79455	SNV	1	A	G	8	36	22.2222	0.125	37.5	Gene: g18174, Five_prime_utr: PAC:26906212.five_prime_UTR.1, mRNA: g18174
chr2	8197225	SNV	1	C	T	6	27	22.2222	0.5	36.6667	Gene: g2692, mRNA: g2692, Three_prime_utr: PAC:26899558.three_prime_UTR.1
chr2	8267990	Deletion	1	T	-	8	36	22.2222	0.375	32.875	Gene: g2703, mRNA: g2703	g2703:c.42-17delT
chr2	8268314	SNV	1	T	A	12	54	22.2222	0	36.3333	Gene: g2703, mRNA: g2703	g2703:c.84+265T>A
chr2	8268568	SNV	1	A	G	14	63	22.2222	0.5	35.5	Gene: g2703, mRNA: g2703	g2703:c.85-243A>G
chr2	8942832	SNV	1	C	T	10	45	22.2222	0	36.4	Gene: g2800, mRNA: g2800, Three_prime_utr: PAC:26900346.three_prime_UTR.1
chr4	33902	Insertion	2	-	GG	8	36	22.2222	0.375	35.4375	Gene: g4495, mRNA: g4495	g4495:c.1843+414_1843+415insCC
chr12	909660	SNV	1	C	T	25	113	22.1239	0.48	35.32	Gene: g12149, mRNA: g12149	g12149:c.3173-552G>A
chr16	3785776	SNV	1	G	A	13	59	22.0339	0.153846	35.0769	CDS: g16184, Gene: g16184, mRNA: g16184	g16184:c.2316C>T
chr16	3785775	SNV	1	T	C	13	59	22.0339	0.153846	35.0769	CDS: g16184, Gene: g16184, mRNA: g16184	g16184:c.2317A>G	g16184:p.Lys773Glu
chr12	683999	SNV	1	T	G	11	50	22	0.363636	36.3636	CDS: g12114, Gene: g12114, mRNA: g12114	g12114:c.1757A>C	g12114:p.Gln586Pro
chr12	974901	Deletion	1	C	-	11	50	22	0.272727	29.6364	Gene: g12151, mRNA: g12151	g12151:c.21-80delG
chr14	2692481	SNV	1	C	G	42	191	21.9895	0.261905	36.7857	Gene: g15090, mRNA: g15090	g15090:c.136+117G>C
chr14	2692482	SNV	1	G	A	42	191	21.9895	0.261905	36.7857	Gene: g15090, mRNA: g15090	g15090:c.136+116C>T
chr13	2939443	SNV	1	C	T	9	41	21.9512	0.3	37.8	CDS: g14332, Gene: g14332, mRNA: g14332	g14332:c.187C>T	g14332:p.Arg63Trp
scaffold_27	15622	SNV	1	T	G	9	41	21.9512	0.111111	34.5556	CDS: g18301, Gene: g18301, mRNA: g18301	g18301:c.22A>C	g18301:p.Ser8Arg
chr5	2076148	SNV	1	C	T	9	41	21.9512	0.454545	34.7273	Gene: Cre05.g234600, mRNA: Cre05.g234600	Cre05.g234600:c.3036+177G>A
chr5	2917054	SNV	1	A	T	9	41	21.9512	0.444444	34.2222	Gene: Cre05.g238140, mRNA: Cre05.g238140, Three_prime_utr: PAC:26897690.three_prime_UTR.1
chr16	864199	SNV	1	C	T	14	64	21.875	0.333333	34.0667	CDS: Cre16.g647950, Gene: Cre16.g647950, mRNA: Cre16.g647950	Cre16.g647950:c.480C>T
scaffold_27	15512	SNV	1	C	T	7	32	21.875	0.142857	35.1429	CDS: g18301, Gene: g18301, mRNA: g18301	g18301:c.132G>A
chr8	2544689	Deletion	2	AC	-	7	32	21.875	0.428571	27.5714	Gene: Cre08.g372300, mRNA: Cre08.g372300	Cre08.g372300:c.2141-30_2141-29delAC
chr9	1044053	SNV	1	G	T	14	64	21.875	0.428571	36.6429	Gene: Cre09.g400750, mRNA: Cre09.g400750	Cre09.g400750:c.565-285G>T		ammonium transporter 1;5
chr12	685849	Insertion	1	-	G	7	32	21.875	0.285714	36.1429	Gene: g12114, mRNA: g12114	g12114:c.276+78_276+79insC
chr14	201445	SNV	1	T	C	7	32	21.875	0.285714	37.1429	Gene: g14683, mRNA: g14683	g14683:c.445-147A>G
chr16	1059368	SNV	1	A	G	7	32	21.875	0.3	37.5	Gene: g15715, mRNA: g15715	g15715:c.1615-1338T>C
chr12	656658	Deletion	2	GT	-	12	55	21.8182	0.5	33.8333	Gene: g12111, mRNA: g12111	g12111:c.370+85_370+86delAC
chr2	126585	SNV	1	C	T	17	78	21.7949	0.470588	35.7647	Gene: Cre02.g074150, Gene: g1315, mRNA: Cre02.g074150, mRNA: g1315, Three_prime_utr: PAC:26900069.three_prime_UTR.1, Three_prime_utr: PAC:26900068.three_prime_UTR.1
chr16	4038519	SNV	1	G	A	27	124	21.7742	0.407407	35.2593	Gene: g16226, mRNA: g16226, Three_prime_utr: PAC:26891428.three_prime_UTR.1
chr11	2860254	SNV	1	C	G	5	23	21.7391	0	39.6	CDS: Cre11.g477700, Gene: Cre11.g477700, mRNA: Cre11.g477700	Cre11.g477700:c.669G>C	Cre11.g477700:p.Gln223His
chr11	420169	SNV	1	T	C	5	23	21.7391	0	34.6	CDS: g11514, Gene: g11514, mRNA: g11514	g11514:c.219T>C
chr12	6649927	SNV	1	A	G	5	23	21.7391	0.4	35.8	CDS: g13266, Gene: g13266, mRNA: g13266	g13266:c.1163T>C	g13266:p.Ile388Thr
chr6	4606172	SNV	1	G	T	5	23	21.7391	0	36	CDS: g6443, Gene: g6443, mRNA: g6443	g6443:c.3051G>T	g6443:p.Gln1017His
chr1	160730	Deletion	2	AC	-	5	23	21.7391	0	29	Gene: Cre01.g001200, mRNA: Cre01.g001200	Cre01.g001200:c.5778-135_5778-134delAC		Protein kinase superfamily protein with octicosapeptide/Phox/Bem1p domain
chr1	6164426	Deletion	1	C	-	5	23	21.7391	0.4	33.2	Gene: Cre01.g044100, mRNA: Cre01.g044100, Three_prime_utr: PAC:26903898.three_prime_UTR.1			beta-amylase 6
chr6	7205328	Deletion	2	TG	-	5	23	21.7391	0.2	35.8	Gene: Cre06.g297850, mRNA: Cre06.g297850	Cre06.g297850:c.13806+68_13806+69delTG
chr7	5115311	Deletion	2	TG	-	5	23	21.7391	0.4	27.2	Gene: Cre07.g347950, mRNA: Cre07.g347950	Cre07.g347950:c.6+101_6+102delTG		Transducin/WD40 repeat-like superfamily protein
chr9	2358527	SNV	1	T	C	5	23	21.7391	0.285714	36.1429	Gene: Cre09.g392000, Gene: g9452, mRNA: Cre09.g392000, mRNA: g9452	Cre09.g392000:c.[783+300T>C]; g9452:c.[783+300T>C]
chr17	1966615	SNV	1	T	C	5	23	21.7391	0	37	Gene: Cre17.g710881, mRNA: Cre17.g710881, Three_prime_utr: PAC:26896683.three_prime_UTR.3
chr11	505469	SNV	1	G	A	5	23	21.7391	0	37.2	Gene: g11527, mRNA: g11527	g11527:c.700-97C>T
chr5	1637083	Deletion	2	TA	-	5	23	21.7391	0.2	28.4	Gene: g5283, mRNA: g5283	g5283:c.1825-128_1825-127delTA		embryo defective 2410
chr12	901619	SNV	1	T	C	13	60	21.6667	0.384615	33.9231	Gene: g12148, mRNA: g12148, Three_prime_utr: PAC:26907483.three_prime_UTR.1
chr12	978170	SNV	1	T	C	13	60	21.6667	0.230769	36.9231	Gene: g12152, mRNA: g12152, mRNA: g12152	g12152:c.[5117+123A>G];[7577+123A>G]
chr12	982697	SNV	1	G	A	21	97	21.6495	0	36.381	Gene: g12152, mRNA: g12152, mRNA: g12152	g12152:c.[2843-60C>T];[5303-60C>T]
chr2	7867869	SNV	1	T	C	40	185	21.6216	0.268293	34.7561	Gene: Cre02.g141700, mRNA: Cre02.g141700	Cre02.g141700:c.1730+1650T>C
chr9	7177172	SNV	1	C	T	16	74	21.6216	0.125	37.9375	Gene: Cre09.g412150, mRNA: Cre09.g412150	Cre09.g412150:c.2482-155C>T
chr16	15671	SNV	1	G	A	24	111	21.6216	0.36	36.72	Gene: g15546, mRNA: g15546, Three_prime_utr: PAC:26892740.three_prime_UTR.1
chr5	2823939	SNV	1	G	C	19	88	21.5909	0.35	35.75	CDS: Cre05.g237500, Gene: Cre05.g237500, mRNA: Cre05.g237500	Cre05.g237500:c.468C>G	Cre05.g237500:p.Ile156Met
chr10	1383921	Deletion	1	C	-	19	88	21.5909	0.473684	34.2632	Gene: Cre10.g427900, Five_prime_utr: PAC:26904300.five_prime_UTR.1, mRNA: Cre10.g427900
chr6	8745628	SNV	1	C	T	11	51	21.5686	0.363636	35.4545	CDS: g7170, CDS: Cre06.g309850, Gene: Cre06.g309850, Gene: g7170, mRNA: Cre06.g309850, mRNA: g7170	Cre06.g309850:c.[49G>A]; g7170:c.[133G>A]	Cre06.g309850:p.[Glu17Lys]; g7170:p.[Glu45Lys]
chr15	1427757	SNV	1	C	T	11	51	21.5686	0	34.7273	Gene: g15490, mRNA: g15490
chr12	1686074	SNV	1	T	G	14	65	21.5385	0.428571	36.1429	Gene: Cre12.g485800, mRNA: Cre12.g485800	Cre12.g485800:c.1396+138A>C
chr2	7867799	SNV	1	G	A	45	209	21.5311	0.434783	36.1957	Gene: Cre02.g141700, mRNA: Cre02.g141700	Cre02.g141700:c.1730+1580G>A
chr13	4459199	SNV	1	G	C	6	28	21.4286	0.333333	37.8333	CDS: Cre13.g603450, Gene: Cre13.g603450, mRNA: Cre13.g603450	Cre13.g603450:c.58G>C	Cre13.g603450:p.Ala20Pro
chr11	715600	SNV	1	T	C	6	28	21.4286	0.166667	37.1667	CDS: g11558, Gene: g11558, mRNA: g11558	g11558:c.30A>G
chr12	684005	SNV	1	T	C	9	42	21.4286	0.444444	36.4444	CDS: g12114, Gene: g12114, mRNA: g12114	g12114:c.1751A>G	g12114:p.Asn584Ser
chr17	973467	SNV	1	A	G	6	28	21.4286	0	39	CDS: g17045, Gene: g17045, mRNA: g17045	g17045:c.129A>G
chr17	5011352	SNV	1	C	T	9	42	21.4286	0.222222	34.3333	CDS: g17775, Gene: g17775, mRNA: g17775	g17775:c.106C>T	g17775:p.Arg36Cys
chr1	1578785	Deletion	2	TG	-	6	28	21.4286	0.166667	28.1667	Gene: Cre01.g008200, mRNA: Cre01.g008200	Cre01.g008200:c.1111-37_1111-36delCA
chr6	7030288	SNV	1	T	G	6	28	21.4286	0.166667	33.5	Gene: Cre06.g296900, Five_prime_utr: PAC:26894171.five_prime_UTR.1, mRNA: Cre06.g296900
chr16	5855011	Deletion	1	C	-	6	28	21.4286	0.5	34	Gene: Cre16.g677600, mRNA: Cre16.g677600, Three_prime_utr: PAC:26892309.three_prime_UTR.1			Leucine carboxyl methyltransferase
chr17	3136369	SNV	1	C	A	6	28	21.4286	0.166667	33.8333	Gene: Cre17.g721550, Gene: g17457, mRNA: Cre17.g721550, mRNA: g17457	Cre17.g721550:c.[118-157G>T]; g17457:c.[118-157G>T]
chr9	6941692	Insertion	1	-	G	21	98	21.4286	0.047619	37.619	Gene: g10169, mRNA: g10169, Three_prime_utr: PAC:26895066.three_prime_UTR.1
chr15	1461996	SNV	1	G	C	6	28	21.4286	0.333333	37.8333	Gene: g15492, mRNA: g15492	g15492:c.3837+1784G>C
chr16	3944160	SNV	1	A	G	9	42	21.4286	0.333333	35.3333	Gene: g16214, mRNA: g16214	g16214:c.416+469A>G
chr5	2942440	Deletion	1	G	-	6	28	21.4286	0.5	37.3333	Gene: g5485, mRNA: g5485	g5485:c.1566+709delC
chr7	1910765	SNV	1	A	G	6	28	21.4286	0	34.8333	Gene: g7559, mRNA: g7559	g7559:c.320-456A>G
chr9	5456925	Deletion	1	C	-	9	42	21.4286	0	31.8889	Gene: g9954, Five_prime_utr: PAC:26895896.five_prime_UTR.1, mRNA: g9954
chr9	2355456	SNV	1	G	T	38	178	21.3483	0.358974	36.0256	Gene: Cre09.g392050, Gene: g9451, Five_prime_utr: PAC:26894993.five_prime_UTR.1, Five_prime_utr: PAC:26894994.five_prime_UTR.1, mRNA: Cre09.g392050, mRNA: g9451
chr4	588987	SNV	1	T	A	13	61	21.3115	0	35.8462	CDS: g4569, Gene: g4569, mRNA: g4569	g4569:c.1268A>T	g4569:p.Glu423Val
chr2	8064103	SNV	1	T	G	39	183	21.3115	0.230769	35.6154	Gene: g2687, Gene: g2688, mRNA: g2687, mRNA: g2687, mRNA: g2687, mRNA: g2688, mRNA: g2688, Three_prime_utr: PAC:26899741.three_prime_UTR.6, Three_prime_utr: PAC:26899742.three_prime_UTR.6
chr4	747689	SNV	1	A	G	13	61	21.3115	0.461538	35.2308	Gene: g4595, Five_prime_utr: PAC:26906097.five_prime_UTR.1, mRNA: g4595
chr12	3143942	SNV	1	T	C	10	47	21.2766	0.363636	35.5455	Gene: g12587, mRNA: g12587	g12587:c.38+22A>G
chr15	1427753	SNV	1	G	C	10	47	21.2766	0.2	35.5	Gene: g15490, mRNA: g15490
chr16	6735148	Insertion	3	-	CAT	10	47	21.2766	0.4	34.2333	Gene: g16705, mRNA: g16705	g16705:c.604-139_604-138insCAT
chr16	864194	SNV	1	G	C	14	66	21.2121	0.357143	34.2143	CDS: Cre16.g647950, Gene: Cre16.g647950, mRNA: Cre16.g647950	Cre16.g647950:c.475G>C	Cre16.g647950:p.Glu159Gln
chr13	1563264	Insertion	2	-	GT	7	33	21.2121	0.285714	34.5	Gene: Cre13.g573100, mRNA: Cre13.g573100	Cre13.g573100:c.390+32_390+33insGT		CBS domain-containing protein with a domain of unknown function (DUF21)
chr2	8196822	SNV	1	G	A	7	33	21.2121	0	35.8571	Gene: g2692, mRNA: g2692, Three_prime_utr: PAC:26899558.three_prime_UTR.1
chr12	915096	SNV	1	A	G	18	85	21.1765	0.210526	35.6316	CDS: g12149, Gene: g12149, mRNA: g12149	g12149:c.1677T>C
chr6	978846	SNV	1	A	G	11	52	21.1538	0.363636	36.3636	CDS: Cre06.g255750, Gene: Cre06.g255750, mRNA: Cre06.g255750	Cre06.g255750:c.1416T>C
chr6	976829	SNV	1	G	C	55	260	21.1538	0.258621	36.7069	Gene: Cre06.g255700, Five_prime_utr: PAC:26893827.five_prime_UTR.1, mRNA: Cre06.g255700
chr9	2355743	SNV	1	C	T	44	208	21.1538	0.363636	36.3977	Gene: Cre09.g392050, Gene: g9451, Five_prime_utr: PAC:26894993.five_prime_UTR.1, Five_prime_utr: PAC:26894994.five_prime_UTR.1, mRNA: Cre09.g392050, mRNA: g9451
chr9	2355745	SNV	1	C	T	44	208	21.1538	0.363636	36.3977	Gene: Cre09.g392050, Gene: g9451, Five_prime_utr: PAC:26894993.five_prime_UTR.1, Five_prime_utr: PAC:26894994.five_prime_UTR.1, mRNA: Cre09.g392050, mRNA: g9451
chr4	2335361	SNV	1	C	G	12	57	21.0526	0	36.9167	Gene: Cre04.g220751, mRNA: Cre04.g220751, Three_prime_utr: PAC:26905963.three_prime_UTR.1
chr7	949780	Deletion	2	TG	-	8	38	21.0526	0.125	34.75	Gene: Cre07.g319200, mRNA: Cre07.g319200	Cre07.g319200:c.2341-317_2341-316delTG
chr17	2898839	SNV	1	C	A	20	95	21.0526	0.3	33.8	Gene: Cre17.g719700, mRNA: Cre17.g719700, Three_prime_utr: PAC:26896956.three_prime_UTR.1
chr17	3136372	SNV	1	A	C	4	19	21.0526	0.25	33.875	Gene: Cre17.g721550, Gene: g17457, mRNA: Cre17.g721550, mRNA: g17457	Cre17.g721550:c.[118-160T>G]; g17457:c.[118-160T>G]
chr17	3136373	SNV	1	G	A	4	19	21.0526	0.25	33.875	Gene: Cre17.g721550, Gene: g17457, mRNA: Cre17.g721550, mRNA: g17457	Cre17.g721550:c.[118-161C>T]; g17457:c.[118-161C>T]
chr13	2939160	Insertion	1	-	C	8	38	21.0526	0	33.75	Gene: g14332, mRNA: g14332	g14332:c.112+52_112+53insC
chr3	6932481	SNV	1	G	A	12	57	21.0526	0.5	36.75	Gene: g4121, mRNA: g4121, Three_prime_utr: PAC:26902515.three_prime_UTR.1
chr2	7867805	SNV	1	G	C	39	186	20.9677	0.414634	36.3415	Gene: Cre02.g141700, mRNA: Cre02.g141700	Cre02.g141700:c.1730+1586G>C
chr5	2917122	Insertion	1	-	T	13	62	20.9677	0.384615	37.0769	Gene: Cre05.g238140, mRNA: Cre05.g238140, Three_prime_utr: PAC:26897690.three_prime_UTR.1
scaffold_19	168618	SNV	1	C	G	13	62	20.9677	0.384615	34.1538	Gene: g18140, Five_prime_utr: PAC:26892925.five_prime_UTR.1, mRNA: g18140
chr5	2823789	Insertion	3	-	CTG	18	86	20.9302	0.333333	37.8889	CDS: Cre05.g237500, Gene: Cre05.g237500, mRNA: Cre05.g237500	Cre05.g237500:c.618_619insCAG	Cre05.g237500:p.Leu206_Gln207insGln
chr2	8979542	SNV	1	C	T	9	43	20.9302	0.1	36.4	CDS: g2806, Gene: g2806, mRNA: g2806	g2806:c.1488G>A
chr10	4784866	SNV	1	C	A	9	43	20.9302	0.333333	36.8889	Gene: g11142, mRNA: g11142	g11142:c.1233+32C>A
chr8	4791833	SNV	1	A	G	9	43	20.9302	0.333333	37.2222	Gene: g9045, mRNA: g9045, mRNA: g9045	g9045:c.[872+601A>G];[872+601A>G]
chr14	522276	SNV	1	A	G	32	153	20.915	0.28125	36.6562	Gene: Cre14.g611450, mRNA: Cre14.g611450, Three_prime_utr: PAC:26890822.three_prime_UTR.1
chr2	2342924	SNV	1	C	T	5	24	20.8333	0.166667	32.8333	CDS: Cre02.g090850, Gene: Cre02.g090850, mRNA: Cre02.g090850	Cre02.g090850:c.909C>T
chr5	2823928	SNV	1	G	A	20	96	20.8333	0.380952	36.7143	CDS: Cre05.g237500, Gene: Cre05.g237500, mRNA: Cre05.g237500	Cre05.g237500:c.479C>T	Cre05.g237500:p.Ser160Leu
chr17	3576691	SNV	1	G	A	5	24	20.8333	0	34.2	CDS: Cre17.g725600, Gene: Cre17.g725600, mRNA: Cre17.g725600	Cre17.g725600:c.555C>T
chr9	7436037	SNV	1	A	G	5	24	20.8333	0.5	37.5	CDS: g10241, Gene: g10241, mRNA: g10241	g10241:c.1394A>G	g10241:p.Gln465Arg
chr11	715618	SNV	1	A	G	5	24	20.8333	0	38.8	CDS: g11558, Gene: g11558, mRNA: g11558	g11558:c.12T>C
chr12	667023	SNV	1	G	T	5	24	20.8333	0.2	35.4	CDS: g12112, Gene: g12112, mRNA: g12112	g12112:c.237C>A
chr12	683937	SNV	1	C	G	5	24	20.8333	0.2	37.2	CDS: g12114, Gene: g12114, mRNA: g12114	g12114:c.1819G>C	g12114:p.Glu607Gln
chr2	7868745	SNV	1	T	A	15	72	20.8333	0.333333	33.4667	Gene: Cre02.g141700, mRNA: Cre02.g141700	Cre02.g141700:c.1731-1611T>A
chr5	2076266	SNV	1	C	T	5	24	20.8333	0.4	36.6	Gene: Cre05.g234600, mRNA: Cre05.g234600	Cre05.g234600:c.3036+59G>A
chr6	5513135	SNV	1	C	T	5	24	20.8333	0	35.6	Gene: Cre06.g284850, Gene: g6623, mRNA: Cre06.g284850, mRNA: g6623	Cre06.g284850:c.[1335+72G>A]; g6623:c.[1335+72G>A]
chr8	4651215	SNV	1	T	C	5	24	20.8333	0.4	36.6	Gene: Cre08.g383550, mRNA: Cre08.g383550	Cre08.g383550:c.1475-281T>C
chr9	6844053	SNV	1	C	T	5	24	20.8333	0.2	32	Gene: Cre09.g409800, mRNA: Cre09.g409800	Cre09.g409800:c.942+35G>A
chr9	6844054	SNV	1	C	T	5	24	20.8333	0.2	32	Gene: Cre09.g409800, mRNA: Cre09.g409800	Cre09.g409800:c.942+34G>A
chr13	3230571	SNV	1	C	T	5	24	20.8333	0	38.4	Gene: Cre13.g585750, mRNA: Cre13.g585750	Cre13.g585750:c.390+241C>T		photosynthetic electron transfer C
chr13	4081533	Deletion	1	T	-	5	24	20.8333	0.2	22	Gene: Cre13.g591350, mRNA: Cre13.g591350	Cre13.g591350:c.654-187delA
chr17	1966611	SNV	1	G	C	5	24	20.8333	0.2	38.2	Gene: Cre17.g710881, mRNA: Cre17.g710881, Three_prime_utr: PAC:26896683.three_prime_UTR.3
chr17	4961974	Deletion	1	G	-	5	24	20.8333	0.4	27.2	Gene: g17770, mRNA: g17770	g17770:c.657+303delG
chr2	9073388	SNV	1	A	T	10	48	20.8333	0.4	34.3	Gene: g2824, mRNA: g2824, Three_prime_utr: PAC:26900537.three_prime_UTR.1
chr4	588963	SNV	1	C	A	10	48	20.8333	0.1	37.8	Gene: g4569, mRNA: g4569	g4569:c.1284+8G>T
chr5	1987350	SNV	1	G	C	20	96	20.8333	0.4	34.7	Gene: g5338, mRNA: g5338, Three_prime_utr: PAC:26897971.three_prime_UTR.1
chr5	2941823	Deletion	1	G	-	5	24	20.8333	0	35.2	Gene: g5485, mRNA: g5485	g5485:c.1567-550delC
chr6	3507490	SNV	1	T	A	5	24	20.8333	0.4	33.8	Gene: g6249, mRNA: g6249, Three_prime_utr: PAC:26892979.three_prime_UTR.1
chr1	588483	SNV	1	G	C	5	24	20.8333	0	36.8	Gene: g80, mRNA: g80	g80:c.1496+78G>C		MUTS homolog 2
chr8	2197499	Insertion	3	-	CTG	5	24	20.8333	0.2	33.8667	Gene: g8661, mRNA: g8661	g8661:c.79-108_79-107insCAG
chr12	679289	SNV	1	C	G	21	101	20.7921	0.318182	33.5	Gene: g12114, mRNA: g12114, Three_prime_utr: PAC:26907869.three_prime_UTR.2
chr3	6280004	SNV	1	A	C	11	53	20.7547	0.454545	36.2727	Gene: Cre03.g192900, mRNA: Cre03.g192900, Three_prime_utr: PAC:26901587.three_prime_UTR.1
chr2	7866812	SNV	1	G	A	67	323	20.743	0.478261	36.1594	Gene: Cre02.g141700, mRNA: Cre02.g141700	Cre02.g141700:c.1730+593G>A
chr10	1383923	SNV	1	T	C	17	82	20.7317	0.411765	36.4118	Gene: Cre10.g427900, Five_prime_utr: PAC:26904300.five_prime_UTR.1, mRNA: Cre10.g427900
chr12	1001797	SNV	1	A	G	6	29	20.6897	0.166667	37.5	CDS: g12153, Gene: g12153, mRNA: g12153	g12153:c.2703T>C
chr6	2215658	SNV	1	C	G	6	29	20.6897	0.333333	37.3333	CDS: g5975, Gene: Cre06.g266200, Gene: g5975, mRNA: Cre06.g266200, mRNA: g5975	g5975:c.[159G>C]; Cre06.g266200:c.[64-380G>C]	g5975:p.Arg53Ser
chr7	6377391	SNV	1	C	T	6	29	20.6897	0.333333	35.8333	CDS: g8315, Gene: g8315, mRNA: g8315	g8315:c.221G>A	g8315:p.Arg74Gln
chr17	1131155	SNV	1	T	C	6	29	20.6897	0	34.5	Gene: Cre17.g704250, mRNA: Cre17.g704250	Cre17.g704250:c.311-48T>C
chr14	202347	SNV	1	C	T	6	29	20.6897	0.166667	35	Gene: g14683, mRNA: g14683	g14683:c.387-138G>A
chr14	2356789	SNV	1	G	T	6	29	20.6897	0.428571	35.2857	Gene: g15035, Gene: Cre14.g623900, mRNA: g15035, mRNA: Cre14.g623900, Three_prime_utr: PAC:26891227.three_prime_UTR.1, Three_prime_utr: PAC:26891226.three_prime_UTR.1
chr4	824820	SNV	1	T	C	6	29	20.6897	0	33.8333	Gene: g4610, mRNA: g4610, Three_prime_utr: PAC:26905551.three_prime_UTR.1
chr9	1648793	Deletion	1	G	-	6	29	20.6897	0.333333	31.1667	Gene: g9342, mRNA: g9342	g9342:c.122-32delC
chr6	8815181	SNV	1	T	C	7	34	20.5882	0.428571	35.1429	CDS: Cre06.g310250, Gene: Cre06.g310250, mRNA: Cre06.g310250	Cre06.g310250:c.235A>G	Cre06.g310250:p.Ile79Val
chr12	1685997	SNV	1	T	A	14	68	20.5882	0.428571	35.3929	Gene: Cre12.g485800, mRNA: Cre12.g485800	Cre12.g485800:c.1397-143A>T
chr12	1685998	SNV	1	G	A	14	68	20.5882	0.428571	35.3929	Gene: Cre12.g485800, mRNA: Cre12.g485800	Cre12.g485800:c.1397-144C>T
chr14	2399367	Insertion	8	-	TGACGCCG	7	34	20.5882	0	36.4107	Gene: Cre14.g624450, Five_prime_utr: PAC:26891136.five_prime_UTR.1, mRNA: Cre14.g624450
chr11	1877439	SNV	1	C	T	7	34	20.5882	0.125	34.25	Gene: g11743, mRNA: g11743, mRNA: g11743, Three_prime_utr: PAC:26890452.three_prime_UTR.2, Three_prime_utr: PAC:26890451.three_prime_UTR.1
chr15	491088	SNV	1	A	T	7	34	20.5882	0.428571	34.4286	Gene: g15357, mRNA: g15357	g15357:c.1615-270T>A
chr15	490929	SNV	1	C	T	15	73	20.5479	0.4	34.4	Gene: g15357, mRNA: g15357	g15357:c.1615-111G>A
chr8	3522474	SNV	1	A	G	8	39	20.5128	0.25	35.125	Gene: Cre08.g375200, Gene: g8840, mRNA: Cre08.g375200, mRNA: g8840	Cre08.g375200:c.[904-634A>G]; g8840:c.[904-634A>G]
chr13	4458997	SNV	1	G	A	8	39	20.5128	0	38	Gene: Cre13.g603450, Five_prime_utr: PAC:26898659.five_prime_UTR.1, mRNA: Cre13.g603450
chr15	489158	SNV	1	G	T	8	39	20.5128	0.125	37.25	Gene: Cre15.g636650, mRNA: Cre15.g636650, Three_prime_utr: PAC:26898241.three_prime_UTR.1
chr1	2158524	Deletion	2	TG	-	9	44	20.4545	0.333333	32	Gene: Cre01.g011800, mRNA: Cre01.g011800	Cre01.g011800:c.1635+51_1635+52delCA		PAS domain-containing protein tyrosine kinase family protein
chr15	1461286	Insertion	1	-	T	9	44	20.4545	0.444444	37	Gene: g15492, mRNA: g15492	g15492:c.3837+1073_3837+1074insT
chr2	8048640	SNV	1	G	T	9	44	20.4545	0.222222	37.2222	Gene: g2687, mRNA: g2687, mRNA: g2687, mRNA: g2687, mRNA: g2687	g2687:c.[1684-372C>A];[1786-372C>A];[1453-889C>A];[1296-372C>A]
chr8	3050402	SNV	1	C	A	9	44	20.4545	0.333333	34.8889	Gene: g8779, mRNA: g8779	g8779:c.1602-204C>A
chr2	7868233	SNV	1	A	G	19	93	20.4301	0.421053	34.5789	Gene: Cre02.g141700, mRNA: Cre02.g141700	Cre02.g141700:c.1730+2014A>G
chr11	447608	SNV	1	G	A	49	240	20.4167	0.42	36.78	Gene: g11519, mRNA: g11519, Three_prime_utr: PAC:26890626.three_prime_UTR.1			protein kinase family protein / protein phosphatase 2C ( PP2C) family protein
chr14	2692505	Insertion	1	-	C	89	436	20.4128	0.348315	35.6517	Gene: g15090, mRNA: g15090	g15090:c.136+93_136+94insG
chr2	7867842	SNV	1	G	A	40	196	20.4082	0.15	35.575	Gene: Cre02.g141700, mRNA: Cre02.g141700	Cre02.g141700:c.1730+1623G>A
chr4	807882	SNV	1	G	C	21	103	20.3883	0.434783	35.3043	Gene: g4605, mRNA: g4605, mRNA: g4605	g4605:c.[883-58C>G];[1186-58C>G]
chr5	1267327	SNV	1	T	A	21	103	20.3883	0.333333	35.5238	Gene: g5228, Five_prime_utr: PAC:26897727.five_prime_UTR.1, Five_prime_utr: PAC:26897728.five_prime_UTR.1, mRNA: g5228, mRNA: g5228
chr2	1602184	Deletion	2	GT	-	11	54	20.3704	0.0909091	32.5455	Gene: Cre02.g085100, mRNA: Cre02.g085100	Cre02.g085100:c.1873-69_1873-68delAC
chr2	8064391	Deletion	1	C	-	25	123	20.3252	0.24	27.12	Gene: g2687, Gene: g2688, mRNA: g2687, mRNA: g2687, mRNA: g2687, mRNA: g2688, mRNA: g2688
chr6	979742	SNV	1	G	C	13	64	20.3125	0	35.7692	CDS: Cre06.g255750, Gene: Cre06.g255750, mRNA: Cre06.g255750	Cre06.g255750:c.749C>G	Cre06.g255750:p.Ala250Gly
chr12	9189866	SNV	1	A	T	13	64	20.3125	0	37.6154	CDS: g13733, CDS: Cre12.g541950, Gene: Cre12.g541950, Gene: g13733, mRNA: Cre12.g541950, mRNA: g13733	Cre12.g541950:c.[747T>A]; g13733:c.[747T>A]
chr10	5784774	SNV	1	G	C	14	69	20.2899	0.214286	36.8571	Gene: g11310, mRNA: g11310, Three_prime_utr: PAC:26904797.three_prime_UTR.1
chr15	1404045	SNV	1	C	T	14	69	20.2899	0.357143	35.1429	Gene: g15489, Five_prime_utr: PAC:26898243.five_prime_UTR.1, mRNA: g15489
chr2	469726	SNV	1	G	T	15	74	20.2703	0.4	35.5333	Gene: Cre02.g076600, mRNA: Cre02.g076600	Cre02.g076600:c.750+46G>T		Peptidyl-tRNA hydrolase family protein
chr12	993506	SNV	1	G	T	16	79	20.2532	0.25	34.6875	Gene: g12152, mRNA: g12152	g12152:c.71-1094C>A
chr12	1007224	SNV	1	T	C	17	84	20.2381	0.470588	35.8235	Gene: g12153, mRNA: g12153	g12153:c.60+31A>G
chr6	2225550	Insertion	8	-	TGCAAGCC	20	99	20.202	0.4	37.3438	Gene: Cre06.g266300, mRNA: Cre06.g266300, Three_prime_utr: PAC:26893786.three_prime_UTR.2
chr9	2354824	SNV	1	G	A	25	124	20.1613	0.16	37.62	Gene: Cre09.g392050, Gene: g9451, mRNA: Cre09.g392050, mRNA: g9451	g9451:c.[210+41C>T]; Cre09.g392050:c.[210+41C>T]
chr9	2354825	SNV	1	G	A	25	124	20.1613	0.16	37.62	Gene: Cre09.g392050, Gene: g9451, mRNA: Cre09.g392050, mRNA: g9451	g9451:c.[210+40C>T]; Cre09.g392050:c.[210+40C>T]
chr2	8067635	Deletion	1	G	-	73	364	20.0549	0.342466	32.8767	Gene: g2687, Gene: g2688, mRNA: g2687, mRNA: g2687, mRNA: g2687, mRNA: g2688, mRNA: g2688, Three_prime_utr: PAC:26899741.three_prime_UTR.3, Three_prime_utr: PAC:26899742.three_prime_UTR.3
chr3	4287733	SNV	1	C	A	6	30	20	0.333333	33.6667	CDS: Cre03.g174543, Gene: Cre03.g174543, mRNA: Cre03.g174543	Cre03.g174543:c.427G>T	Cre03.g174543:p.Val143Leu
chr3	7003088	Deletion	12	ATTGCTCCGCCG	-	8	40	20	0.125	35.5	CDS: Cre03.g208550, Gene: Cre03.g208550, mRNA: Cre03.g208550	Cre03.g208550:c.1724_1735delCGGCGGAGCAAT	Cre03.g208550:p.Ala575_Ser579delinsAla
chr6	2232053	SNV	1	A	C	7	35	20	0.285714	35.7143	CDS: Cre06.g266350, Gene: Cre06.g266350, mRNA: Cre06.g266350	Cre06.g266350:c.2335T>G	Cre06.g266350:p.Trp779Gly	ubiquitin-specific protease 16
chr7	2366197	SNV	1	G	A	9	45	20	0.222222	35.2222	CDS: Cre07.g328300, Gene: Cre07.g328300, mRNA: Cre07.g328300	Cre07.g328300:c.865G>A	Cre07.g328300:p.Glu289Lys
chr16	2689640	Deletion	1	A	-	4	20	20	0.25	30	CDS: Cre16.g662250, Gene: Cre16.g662250, mRNA: Cre16.g662250	Cre16.g662250:c.716delT	Cre16.g662250:p.Leu239fs
chr9	7436027	SNV	1	C	G	5	25	20	0.333333	36.1667	CDS: g10241, Gene: g10241, mRNA: g10241	g10241:c.1384C>G	g10241:p.Arg462Gly
chr12	209536	SNV	1	G	A	4	20	20	0.5	31.5	CDS: g12033, CDS: g12033, Gene: g12033, mRNA: g12033, mRNA: g12033	g12033:c.[128G>A];[128G>A]	g12033:p.[Cys43Tyr];[Cys43Tyr]
chr12	983022	Deletion	3	AAC	-	13	65	20	0.0769231	36.4615	CDS: g12152, CDS: g12152, Gene: g12152, mRNA: g12152, mRNA: g12152	g12152:c.[2812_2814delGTT];[5272_5274delGTT]	g12152:p.[Val938del];[Val1758del]
chr15	632468	SNV	1	C	G	4	20	20	0.25	34.75	CDS: g15376, CDS: g15376, Gene: g15376, mRNA: g15376, mRNA: g15376	g15376:c.[696C>G];[696C>G]		Bifunctional inhibitor/lipid-transfer protein/seed storage 2S albumin superfamily protein
scaffold_22	272	SNV	1	C	T	12	60	20	0.5	36.5833	CDS: g18199, Gene: g18199, mRNA: g18199	g18199:c.1308G>A
chr2	9051504	SNV	1	C	T	4	20	20	0.25	35.25	CDS: g2819, Gene: g2819, mRNA: g2819	g2819:c.24G>A
chr4	586103	SNV	1	C	T	10	50	20	0	34.8	CDS: g4569, Gene: g4569, mRNA: g4569	g4569:c.1330G>A	g4569:p.Asp444Asn
chr5	1439123	SNV	1	A	G	4	20	20	0.25	37.75	CDS: g5254, Gene: g5254, mRNA: g5254	g5254:c.8151T>C
chr8	2201568	SNV	1	A	G	5	25	20	0	33.6	CDS: g8663, Gene: g8663, mRNA: g8663	g8663:c.1514T>C	g8663:p.Ile505Thr	AGC (cAMP-dependent, cGMP-dependent and protein kinase C) kinase family protein
chr1	310205	Deletion	1	C	-	5	25	20	0.4	27.6	Gene: Cre01.g001750, mRNA: Cre01.g001750	Cre01.g001750:c.805-318delG		trigger factor type chaperone family protein
chr1	2073184	SNV	1	C	T	5	25	20	0.2	34.2	Gene: Cre01.g011100, Gene: g278, mRNA: Cre01.g011100, mRNA: g278	Cre01.g011100:c.[539+157G>A]; g278:c.[539+157G>A]		cycloartenol synthase 1
chr2	6610619	Deletion	2	CA	-	6	30	20	0	34.3333	Gene: Cre02.g117350, mRNA: Cre02.g117350	Cre02.g117350:c.765+77_765+78delCA		tubulin-tyrosine ligases;tubulin-tyrosine ligases
chr2	7866586	SNV	1	G	A	22	110	20	0.136364	36.5455	Gene: Cre02.g141700, mRNA: Cre02.g141700	Cre02.g141700:c.1730+367G>A
chr2	7867465	SNV	1	G	A	16	80	20	0.25	36.8125	Gene: Cre02.g141700, mRNA: Cre02.g141700	Cre02.g141700:c.1730+1246G>A
chr2	7868175	SNV	1	A	G	9	45	20	0.444444	35.7778	Gene: Cre02.g141700, mRNA: Cre02.g141700	Cre02.g141700:c.1730+1956A>G
chr3	3993746	SNV	1	C	T	9	45	20	0.3	34.7	Gene: Cre03.g171950, mRNA: Cre03.g171950	Cre03.g171950:c.3280-143G>A		phosphoenolpyruvate carboxylase 4
chr3	8352145	Deletion	1	G	-	17	85	20	0.470588	32.8824	Gene: Cre03.g198800, Five_prime_utr: PAC:26902141.five_prime_UTR.2, mRNA: Cre03.g198800
chr6	5555308	SNV	1	G	C	7	35	20	0.428571	34.4286	Gene: Cre06.g285300, mRNA: Cre06.g285300	Cre06.g285300:c.2198-73G>C		organic cation/carnitine transporter4
chr8	1381692	SNV	1	C	T	5	25	20	0	33.6	Gene: Cre08.g364050, mRNA: Cre08.g364050	Cre08.g364050:c.605+95G>A
chr8	4349374	Insertion	2	-	CA	10	50	20	0.2	35.45	Gene: Cre08.g381650, mRNA: Cre08.g381650	Cre08.g381650:c.1034+53_1034+54insTG		alpha/beta-Hydrolases superfamily protein
chr9	2361928	Insertion	2	-	AC	4	20	20	0.25	37.25	Gene: Cre09.g392000, Gene: g9452, mRNA: Cre09.g392000, mRNA: g9452	Cre09.g392000:c.[1424-37_1424-36insAC]; g9452:c.[1424-37_1424-36insAC]
chr9	1153463	Deletion	2	TG	-	4	20	20	0.5	25.5	Gene: Cre09.g400000, mRNA: Cre09.g400000	Cre09.g400000:c.3462-72_3462-71delCA
chr9	636207	SNV	1	C	T	14	70	20	0.357143	33.2857	Gene: Cre09.g403350, mRNA: Cre09.g403350, Three_prime_utr: PAC:26895964.three_prime_UTR.1
chr10	1383920	SNV	1	T	G	16	80	20	0.4375	37	Gene: Cre10.g427900, Five_prime_utr: PAC:26904300.five_prime_UTR.1, mRNA: Cre10.g427900
chr10	5869684	SNV	1	A	G	8	40	20	0.25	36.625	Gene: Cre10.g461850, mRNA: Cre10.g461850	Cre10.g461850:c.1487+763A>G
chr11	2523707	SNV	1	T	G	5	25	20	0.2	34.8	Gene: Cre11.g475950, Gene: g11822, mRNA: Cre11.g475950, mRNA: g11822	Cre11.g475950:c.[7306+466T>G]; g11822:c.[7306+466T>G]
chr11	2524139	SNV	1	A	T	5	25	20	0	35.8	Gene: Cre11.g475950, Gene: g11822, mRNA: Cre11.g475950, mRNA: g11822	Cre11.g475950:c.[7306+898A>T]; g11822:c.[7306+898A>T]
chr12	2562384	SNV	1	T	A	4	20	20	0.25	35	Gene: Cre12.g505400, mRNA: Cre12.g505400, Three_prime_utr: PAC:26906316.three_prime_UTR.1
chr12	2451875	Insertion	2	-	CA	5	25	20	0.2	36.4	Gene: Cre12.g506900, mRNA: Cre12.g506900	Cre12.g506900:c.2658+61_2658+62insTG		Pseudouridine synthase family protein
chr15	1235275	SNV	1	C	T	9	45	20	0.444444	33.7778	Gene: Cre15.g641500, mRNA: Cre15.g641500, Three_prime_utr: PAC:26898125.three_prime_UTR.1
chr16	1368899	Deletion	2	TG	-	4	20	20	0	31.25	Gene: Cre16.g651923, mRNA: Cre16.g651923	Cre16.g651923:c.1551+26_1551+27delTG		carotenoid isomerase
chr17	3136322	SNV	1	G	A	8	40	20	0.125	36.75	Gene: Cre17.g721550, Gene: g17457, mRNA: Cre17.g721550, mRNA: g17457	Cre17.g721550:c.[118-110C>T]; g17457:c.[118-110C>T]
chr11	715406	SNV	1	C	A	6	30	20	0	34.3333	Gene: g11558, mRNA: g11558	g11558:c.194+30G>T
chr12	836716	SNV	1	A	G	6	30	20	0.5	36.6667	Gene: g12143, mRNA: g12143	g12143:c.274-73T>C		phosphate transporter 2;1
chr12	907840	Deletion	1	A	-	6	30	20	0.5	34	Gene: g12149, mRNA: g12149	g12149:c.3698-131delT
chr12	974909	SNV	1	T	G	8	40	20	0.444444	36.1111	Gene: g12151, mRNA: g12151	g12151:c.21-88A>C
chr12	999557	SNV	1	T	G	9	45	20	0.111111	35.2222	Gene: g12153, mRNA: g12153	g12153:c.4168-6A>C
chr12	1007127	SNV	1	T	C	16	80	20	0.5	36.625	Gene: g12153, mRNA: g12153	g12153:c.61-21A>G
chr15	1453867	SNV	1	T	C	4	20	20	0	36.25	Gene: g15491, mRNA: g15491	g15491:c.281+436A>G
chr15	1461431	SNV	1	T	A	4	20	20	0.25	33.5	Gene: g15492, mRNA: g15492	g15492:c.3837+1219T>A
chr15	1466858	SNV	1	C	T	5	25	20	0.2	34.8	Gene: g15492, mRNA: g15492	g15492:c.3838-1293C>T
chr1	1125847	SNV	1	C	G	7	35	20	0	38.2857	Gene: g161, Five_prime_utr: PAC:26903902.five_prime_UTR.1, mRNA: g161
chr17	4849205	SNV	1	A	C	12	60	20	0.333333	35.6667	Gene: g17748, Gene: g17749, mRNA: g17748, mRNA: g17749, Three_prime_utr: PAC:26896380.three_prime_UTR.1, Three_prime_utr: PAC:26896832.three_prime_UTR.1
chr17	5123708	SNV	1	C	G	9	45	20	0.444444	34.3889	Gene: g17785, mRNA: g17785	g17785:c.2385-1471G>C
chr17	5123709	SNV	1	A	G	9	45	20	0.444444	34.3889	Gene: g17785, mRNA: g17785	g17785:c.2385-1472T>C
chr17	5296483	Deletion	1	C	-	4	20	20	0	29.25	Gene: g17808, mRNA: g17808	g17808:c.429+245delC		PAS domain-containing protein tyrosine kinase family protein
scaffold_25	52169	Deletion	1	T	-	4	20	20	0	39	Gene: g18280, mRNA: g18280	g18280:c.505-72delA
chr2	8197411	SNV	1	A	G	7	35	20	0.285714	37.4286	Gene: g2692, mRNA: g2692	g2692:c.1639+36T>C
chr2	8268262	SNV	1	C	T	6	30	20	0.166667	36.6667	Gene: g2703, mRNA: g2703	g2703:c.84+213C>T
chr3	513926	SNV	1	G	T	14	70	20	0.266667	34.9333	Gene: g2926, Five_prime_utr: PAC:26902190.five_prime_UTR.1, mRNA: g2926			Isoprenylcysteine carboxyl methyltransferase (ICMT) family
chr3	9211686	Insertion	2	-	TG	4	20	20	0.25	36.25	Gene: g4489, mRNA: g4489	g4489:c.287+133_287+134insTG		copper ion binding
chr5	624414	Deletion	1	C	-	4	20	20	0.25	26.75	Gene: g5140, mRNA: g5140, mRNA: g5140	g5140:c.[1047+129delG];[1104+129delG]		acyl-CoA oxidase 2
chr5	2338225	SNV	1	C	T	8	40	20	0.5	37.75	Gene: g5395, mRNA: g5395, mRNA: g5395	g5395:c.[166+11G>A];[166+11G>A]
chr7	877362	SNV	1	A	C	4	20	20	0.5	35.5	Gene: g7366, mRNA: g7366	g7366:c.1758-256T>G		LSD1-like2
chr7	1910426	SNV	1	A	C	4	20	20	0.5	37.5	Gene: g7559, mRNA: g7559	g7559:c.319+440A>C
chr1	4916083	SNV	1	A	C	4	20	20	0	37.25	Gene: g769, mRNA: g769, mRNA: g769	g769:c.[1404+264A>C];[1404+264A>C]		Insulinase (Peptidase family M16) family protein
chr7	4494582	SNV	1	G	A	4	20	20	0.25	35	Gene: g7988, mRNA: g7988	g7988:c.237+472G>A
chr8	3258091	SNV	1	C	T	7	35	20	0.142857	37.8571	Gene: g8806, mRNA: g8806, mRNA: g8806	g8806:c.[8924-1190C>T];[8924-1190C>T]
chr8	4791933	SNV	1	G	A	17	85	20	0.235294	33.5882	Gene: g9045, mRNA: g9045, mRNA: g9045	g9045:c.[872+701G>A];[872+701G>A]
chr9	3437330	SNV	1	T	C	15	75	20	0.133333	33.1333	Gene: g9636, mRNA: g9636	g9636:c.595+108T>C		DNAJ heat shock family protein

## Sheet: UTRs - 313
Mapping	Reference Position	Type	Length	Reference	Allele	Count	Coverage	Frequency	Forward/reverse balance	Average quality	Overlapping annotations	Coding region change	Amino acid change	Annotation
chr17	4472200	SNV	1	G	A	97	97	100	0.323232	35.7475	Gene: g17698, Gene: Cre17.g732350, mRNA: g17698, mRNA: Cre17.g732350, Three_prime_utr: PAC:26896496.three_prime_UTR.1, Three_prime_utr: PAC:26896497.three_prime_UTR.1			glyoxal oxidase-related protein
chr3	8352134	Insertion	1	-	T	22	22	100	0.5	34.5909	Gene: Cre03.g198800, Five_prime_utr: PAC:26902141.five_prime_UTR.2, mRNA: Cre03.g198800
chr3	8352136	Insertion	1	-	C	21	21	100	0.47619	36.381	Gene: Cre03.g198800, Five_prime_utr: PAC:26902141.five_prime_UTR.2, mRNA: Cre03.g198800
chr8	91791	SNV	1	A	G	49	49	100	0.313725	35.451	Gene: g8346, mRNA: g8346, Three_prime_utr: PAC:26888193.three_prime_UTR.1
chr5	1813179	Deletion	2	TA	-	56	57	98.2456	0.482143	32.6071	Gene: Cre05.g242150, Five_prime_utr: PAC:26897766.five_prime_UTR.1, mRNA: Cre05.g242150
chr5	1813176	SNV	1	G	T	52	53	98.1132	0.481481	36.4815	Gene: Cre05.g242150, Five_prime_utr: PAC:26897766.five_prime_UTR.1, mRNA: Cre05.g242150
chr3	8352128	Deletion	1	C	-	23	24	95.8333	0.434783	29.5652	Gene: Cre03.g198800, Five_prime_utr: PAC:26902141.five_prime_UTR.2, mRNA: Cre03.g198800
chr11	1642432	Insertion	8	-	AATTGACT	35	51	68.6275	0.371429	36.6571	Gene: g11700, Five_prime_utr: PAC:26890557.five_prime_UTR.1, mRNA: g11700			Phosphoglycerate kinase family protein
chr4	705172	SNV	1	A	G	99	147	67.3469	0.363636	35.1919	Gene: g4585, mRNA: g4585, Three_prime_utr: PAC:26906169.three_prime_UTR.1			autoinhibited Ca(2+)-ATPase 10
chr4	705174	SNV	1	A	G	99	147	67.3469	0.363636	35.1919	Gene: g4585, mRNA: g4585, Three_prime_utr: PAC:26906169.three_prime_UTR.1
chr4	705178	SNV	1	T	G	103	160	64.375	0.417476	34.4272	Gene: g4585, mRNA: g4585, Three_prime_utr: PAC:26906169.three_prime_UTR.1
chr7	5799075	Insertion	7	-	CCGGTGG	16	25	64	0.5	35.8571	Gene: Cre07.g353200, mRNA: Cre07.g353200, Three_prime_utr: PAC:26888916.three_prime_UTR.1			GTP-binding protein, HflX
chr2	6565379	Insertion	8	-	CGGCGAGT	25	40	62.5	0.36	35.415	Gene: Cre02.g117050, Gene: g2423, Five_prime_utr: PAC:26900032.five_prime_UTR.1, Five_prime_utr: PAC:26900030.five_prime_UTR.1, Five_prime_utr: PAC:26900031.five_prime_UTR.1, mRNA: Cre02.g117050, mRNA: g2423, mRNA: g2423			Protein kinase superfamily protein
chr4	705184	Deletion	1	T	-	80	129	62.0155	0.325	32.8625	Gene: g4585, mRNA: g4585, Three_prime_utr: PAC:26906169.three_prime_UTR.1
chr3	8352143	SNV	1	C	A	29	47	61.7021	0.482759	35.7759	Gene: Cre03.g198800, Five_prime_utr: PAC:26902141.five_prime_UTR.2, mRNA: Cre03.g198800
chr3	8352144	SNV	1	C	T	29	47	61.7021	0.482759	35.7759	Gene: Cre03.g198800, Five_prime_utr: PAC:26902141.five_prime_UTR.2, mRNA: Cre03.g198800
chr13	2988647	Insertion	1	-	T	103	167	61.6766	0.446602	33.7184	Gene: Cre13.g584170, mRNA: Cre13.g584170, Three_prime_utr: PAC:26898556.three_prime_UTR.1
chr2	1681372	Insertion	8	-	ATTAAAAC	29	50	58	0.206897	36.1164	Gene: Cre02.g085800, mRNA: Cre02.g085800, Three_prime_utr: PAC:26899892.three_prime_UTR.1
chr6	7880325	SNV	1	C	T	109	188	57.9787	0.472727	34.5818	Gene: Cre06.g303171, mRNA: Cre06.g303171, Three_prime_utr: PAC:26893592.three_prime_UTR.1
chr17	3590789	Insertion	8	-	TGATACAT	29	51	56.8627	0.344828	36.4009	Gene: g17553, mRNA: g17553, Three_prime_utr: PAC:26896681.three_prime_UTR.1
chr3	968671	Insertion	8	-	TGAGCAGG	33	59	55.9322	0.333333	35.2689	Gene: Cre03.g148000, Five_prime_utr: PAC:26901430.five_prime_UTR.1, mRNA: Cre03.g148000
chr15	111489	SNV	1	T	C	11	20	55	0.454545	35.7273	Gene: g15310, mRNA: g15310, Three_prime_utr: PAC:26898246.three_prime_UTR.1
chr11	3613433	Insertion	8	-	GTCGAACC	40	73	54.7945	0.45	35.7406	Gene: Cre11.g482050, mRNA: Cre11.g482050, Three_prime_utr: PAC:26890355.three_prime_UTR.1			DGCR14-related
scaffold_22	31880	Deletion	2	AG	-	27	50	54	0	33.9259	Gene: g18206, mRNA: g18206, mRNA: g18206, Three_prime_utr: PAC:26892849.three_prime_UTR.1, Three_prime_utr: PAC:26892850.three_prime_UTR.1
chr9	4440434	Insertion	8	-	GACGCGAG	33	62	53.2258	0.363636	35.8788	Gene: g9813, Five_prime_utr: PAC:26895092.five_prime_UTR.1, mRNA: g9813
chr11	442577	SNV	1	A	G	22	42	52.381	0.363636	36.4091	Gene: g11518, mRNA: g11518, Three_prime_utr: PAC:26890138.three_prime_UTR.1			protein kinase family protein / protein phosphatase 2C ( PP2C) family protein
chr7	4461868	Insertion	8	-	TCAGCATG	39	75	52	0.410256	36.8141	Gene: Cre07.g343300, Five_prime_utr: PAC:26888923.five_prime_UTR.1, mRNA: Cre07.g343300
chr6	1188899	SNV	1	A	C	14	27	51.8519	0.214286	35.5714	Gene: Cre06.g257500, Five_prime_utr: PAC:26893029.five_prime_UTR.1, mRNA: Cre06.g257500			general regulatory factor 7
chr6	7880332	SNV	1	G	A	86	166	51.8072	0.494253	33.7701	Gene: Cre06.g303171, mRNA: Cre06.g303171, Three_prime_utr: PAC:26893592.three_prime_UTR.1
chr1	4569180	Deletion	1	C	-	16	31	51.6129	0.375	32.0625	Gene: Cre01.g031250, mRNA: Cre01.g031250, Three_prime_utr: PAC:26903205.three_prime_UTR.1			Protein of unknown function (DUF1279)
chr3	8415422	SNV	1	G	A	96	189	50.7937	0.1875	34.8854	Gene: g4359, Five_prime_utr: PAC:26902533.five_prime_UTR.1, mRNA: g4359
chr16	3002067	SNV	1	T	C	15	30	50	0.2	35.8	Gene: Cre16.g664600, Five_prime_utr: PAC:26892177.five_prime_UTR.1, mRNA: Cre16.g664600			GRIM-19 protein
chr6	4397187	Deletion	10	GAGAAGAAAA	-	10	20	50	0.4	34.5	Gene: g6416, mRNA: g6416, Three_prime_utr: PAC:26893482.three_prime_UTR.1
chr2	8066403	SNV	1	T	C	21	43	48.8372	0.26087	35.6522	Gene: g2687, Gene: g2688, mRNA: g2687, mRNA: g2687, mRNA: g2687, mRNA: g2688, mRNA: g2688, Three_prime_utr: PAC:26899741.three_prime_UTR.5, Three_prime_utr: PAC:26899742.three_prime_UTR.5
chr6	1188902	SNV	1	C	G	14	29	48.2759	0.214286	35.6429	Gene: Cre06.g257500, Five_prime_utr: PAC:26893029.five_prime_UTR.1, mRNA: Cre06.g257500
scaffold_29	42719	SNV	1	C	A	11	23	47.8261	0	36.9091	Gene: g18323, Three_prime_utr: PAC:26904296.three_prime_UTR.1, mRNA: g18323
chr13	2813588	SNV	1	C	G	21	45	46.6667	0.47619	36.3333	Gene: Cre13.g583100, mRNA: Cre13.g583100, Three_prime_utr: PAC:26898695.three_prime_UTR.1			KDO transferase A
chr6	1184981	Insertion	9	-	TGACCAGTC	13	28	46.4286	0.461538	37.2222	Gene: Cre06.g257450, Five_prime_utr: PAC:26893545.five_prime_UTR.1, mRNA: Cre06.g257450			ATPase, F0/V0 complex, subunit C protein
chr4	705145	SNV	1	T	C	55	119	46.2185	0.290909	33.9818	Gene: g4585, mRNA: g4585, Three_prime_utr: PAC:26906169.three_prime_UTR.1
chr8	347913	SNV	1	A	G	18	39	46.1538	0.333333	34.2222	Gene: g8386, mRNA: g8386, Three_prime_utr: PAC:26888474.three_prime_UTR.1
chr17	2713335	SNV	1	G	A	91	198	45.9596	0.373626	33.7802	Gene: Cre17.g718050, Five_prime_utr: PAC:26896378.five_prime_UTR.1, mRNA: Cre17.g718050
chr10	1267337	Insertion	8	-	TGCATCGC	15	33	45.4545	0.4	37.4167	Gene: Cre10.g426900, mRNA: Cre10.g426900, Three_prime_utr: PAC:26905420.three_prime_UTR.1
chr16	3002063	SNV	1	A	T	10	22	45.4545	0.3	36.2	Gene: Cre16.g664600, Five_prime_utr: PAC:26892177.five_prime_UTR.1, mRNA: Cre16.g664600
chr6	7880314	SNV	1	G	A	71	158	44.9367	0.478873	33.662	Gene: Cre06.g303171, mRNA: Cre06.g303171, Three_prime_utr: PAC:26893592.three_prime_UTR.1
chr6	7880311	SNV	1	A	G	65	146	44.5205	0.323077	34.8615	Gene: Cre06.g303171, mRNA: Cre06.g303171, Three_prime_utr: PAC:26893592.three_prime_UTR.1
chr14	2399367	Deletion	1	C	-	11	25	44	0.272727	29.4545	Gene: Cre14.g624450, Five_prime_utr: PAC:26891136.five_prime_UTR.1, mRNA: Cre14.g624450
chr16	6975843	SNV	1	A	C	9	21	42.8571	0.444444	34	Gene: g16748, mRNA: g16748, Three_prime_utr: PAC:26891848.three_prime_UTR.1
chr16	3002060	Deletion	1	A	-	10	24	41.6667	0.3	32.5	Gene: Cre16.g664600, Five_prime_utr: PAC:26892177.five_prime_UTR.1, mRNA: Cre16.g664600
chr13	4597408	Insertion	2	-	GT	28	68	41.1765	0.321429	36.4107	Gene: Cre13.g604000, mRNA: Cre13.g604000, Three_prime_utr: PAC:26899235.three_prime_UTR.1
chr2	8197179	SNV	1	T	A	18	44	40.9091	0.368421	37.5789	Gene: g2692, mRNA: g2692, Three_prime_utr: PAC:26899558.three_prime_UTR.1
chr15	489180	SNV	1	G	A	22	54	40.7407	0.291667	34.9167	Gene: Cre15.g636650, mRNA: Cre15.g636650, Three_prime_utr: PAC:26898241.three_prime_UTR.1			snRNA activating complex family protein
chr6	7880307	SNV	1	C	T	56	138	40.5797	0.357143	34.7321	Gene: Cre06.g303171, mRNA: Cre06.g303171, Three_prime_utr: PAC:26893592.three_prime_UTR.1
chr2	2966466	SNV	1	C	A	25	62	40.3226	0.44	32.96	Gene: g1807, mRNA: g1807, Three_prime_utr: PAC:26900355.three_prime_UTR.1
chr2	9051204	SNV	1	A	T	16	40	40	0	37.375	Gene: g2819, mRNA: g2819, Three_prime_utr: PAC:26900969.three_prime_UTR.1
chr14	2646291	SNV	1	A	C	25	63	39.6825	0.48	36.28	Gene: Cre14.g626300, mRNA: Cre14.g626300, Three_prime_utr: PAC:26890799.three_prime_UTR.1
chr8	347968	SNV	1	G	T	34	86	39.5349	0.485714	35.3714	Gene: g8386, mRNA: g8386, Three_prime_utr: PAC:26888474.three_prime_UTR.1
chr15	489169	SNV	1	A	G	15	38	39.4737	0.0666667	37.5	Gene: Cre15.g636650, mRNA: Cre15.g636650, Three_prime_utr: PAC:26898241.three_prime_UTR.1
chr15	489171	SNV	1	G	T	15	38	39.4737	0.0666667	37.5	Gene: Cre15.g636650, mRNA: Cre15.g636650, Three_prime_utr: PAC:26898241.three_prime_UTR.1
chr2	6171977	SNV	1	G	A	13	33	39.3939	0.384615	34.6923	Gene: Cre02.g113700, mRNA: Cre02.g113700, Three_prime_utr: PAC:26899975.three_prime_UTR.1			uvrB/uvrC motif-containing protein
chr6	2845782	SNV	1	C	T	52	135	38.5185	0.403846	34.0962	Gene: Cre06.g271800, Gene: g6099, mRNA: Cre06.g271800, mRNA: g6099, Three_prime_utr: PAC:26892966.three_prime_UTR.2, Three_prime_utr: PAC:26892965.three_prime_UTR.1			senescence-associated gene 29
chr2	8063795	SNV	1	G	T	20	52	38.4615	0.238095	36.9048	Gene: g2687, Gene: g2688, mRNA: g2687, mRNA: g2687, mRNA: g2687, mRNA: g2688, mRNA: g2688, Three_prime_utr: PAC:26899741.three_prime_UTR.6, Three_prime_utr: PAC:26899742.three_prime_UTR.6
chr12	151090	SNV	1	A	G	61	159	38.3648	0.212121	36.1212	Gene: Cre12.g484450, Five_prime_utr: PAC:26906549.five_prime_UTR.1, mRNA: Cre12.g484450
chr17	966523	SNV	1	C	G	8	21	38.0952	0.375	34.625	Gene: g17044, mRNA: g17044, Three_prime_utr: PAC:26896860.three_prime_UTR.1
chr6	2845785	SNV	1	C	T	53	141	37.5887	0.264151	33.5094	Gene: Cre06.g271800, Gene: g6099, mRNA: Cre06.g271800, mRNA: g6099, Three_prime_utr: PAC:26892966.three_prime_UTR.2, Three_prime_utr: PAC:26892965.three_prime_UTR.1
chr2	1973825	Insertion	1	-	G	18	48	37.5	0.5	36.1111	Gene: Cre02.g088200, Five_prime_utr: PAC:26900676.five_prime_UTR.1, mRNA: Cre02.g088200			PDI-like 1-4
chr4	2331081	SNV	1	T	C	12	32	37.5	0.333333	34.125	Gene: Cre04.g220750, mRNA: Cre04.g220750, Three_prime_utr: PAC:26905548.three_prime_UTR.1
chr4	2331082	SNV	1	T	G	12	32	37.5	0.333333	34.125	Gene: Cre04.g220750, mRNA: Cre04.g220750, Three_prime_utr: PAC:26905548.three_prime_UTR.1
chr14	2646299	SNV	1	T	C	25	67	37.3134	0.481481	35.8889	Gene: Cre14.g626300, mRNA: Cre14.g626300, Three_prime_utr: PAC:26890799.three_prime_UTR.1
chr14	1284284	SNV	1	T	G	15	41	36.5854	0.4375	36.3125	Gene: Cre14.g616650, mRNA: Cre14.g616650, Three_prime_utr: PAC:26891186.three_prime_UTR.2
chr8	347987	SNV	1	G	T	24	66	36.3636	0.458333	35.5	Gene: g8386, mRNA: g8386, Three_prime_utr: PAC:26888474.three_prime_UTR.1
chr4	811000	SNV	1	C	T	25	69	36.2319	0.24	36.5067	Gene: g4606, mRNA: g4606, Three_prime_utr: PAC:26906172.three_prime_UTR.1
chr4	811001	SNV	1	C	T	25	69	36.2319	0.24	36.5067	Gene: g4606, mRNA: g4606, Three_prime_utr: PAC:26906172.three_prime_UTR.1
chr4	811002	SNV	1	C	T	25	69	36.2319	0.24	36.5067	Gene: g4606, mRNA: g4606, Three_prime_utr: PAC:26906172.three_prime_UTR.1
scaffold_29	42730	SNV	1	C	T	9	25	36	0	36.7778	Gene: g18323, Three_prime_utr: PAC:26904296.three_prime_UTR.1, mRNA: g18323
chr8	347998	Deletion	1	C	-	23	64	35.9375	0.434783	31.4783	Gene: g8386, mRNA: g8386, Three_prime_utr: PAC:26888474.three_prime_UTR.1
chr3	8352708	Insertion	1	-	C	10	28	35.7143	0.4	35.8	Gene: Cre03.g198800, Five_prime_utr: PAC:26902141.five_prime_UTR.1, mRNA: Cre03.g198800			myb-like transcription factor family protein
chr10	6533841	SNV	1	T	G	15	42	35.7143	0.4	35.7333	Gene: Cre10.g466900, Five_prime_utr: PAC:26905328.five_prime_UTR.1, mRNA: Cre10.g466900
chr12	151099	SNV	1	A	G	55	154	35.7143	0.189655	36.6897	Gene: Cre12.g484450, Five_prime_utr: PAC:26906549.five_prime_UTR.1, mRNA: Cre12.g484450
chr1	5875353	SNV	1	A	G	23	65	35.3846	0.26087	35.1739	Gene: Cre01.g041900, mRNA: Cre01.g041900, Three_prime_utr: PAC:26902996.three_prime_UTR.1
chr5	162387	SNV	1	G	A	37	105	35.2381	0.108108	37.3514	Gene: g5084, mRNA: g5084, Three_prime_utr: PAC:26897863.three_prime_UTR.1
chr3	8415410	SNV	1	C	G	44	126	34.9206	0.25	34.8409	Gene: g4359, Five_prime_utr: PAC:26902533.five_prime_UTR.1, mRNA: g4359
chr1	5875356	SNV	1	A	G	24	69	34.7826	0.28	36.6	Gene: Cre01.g041900, mRNA: Cre01.g041900, Three_prime_utr: PAC:26902996.three_prime_UTR.1
chr14	522231	SNV	1	A	G	65	187	34.7594	0.476923	35.7077	Gene: Cre14.g611450, mRNA: Cre14.g611450, Three_prime_utr: PAC:26890822.three_prime_UTR.1			Plastid-lipid associated protein PAP / fibrillin family protein
chr14	2646304	SNV	1	T	A	20	58	34.4828	0.5	36.225	Gene: Cre14.g626300, mRNA: Cre14.g626300, Three_prime_utr: PAC:26890799.three_prime_UTR.1
chr14	2646306	SNV	1	A	T	20	58	34.4828	0.5	36.225	Gene: Cre14.g626300, mRNA: Cre14.g626300, Three_prime_utr: PAC:26890799.three_prime_UTR.1
chr12	901545	SNV	1	G	A	30	88	34.0909	0.419355	35.129	Gene: g12148, mRNA: g12148, Three_prime_utr: PAC:26907483.three_prime_UTR.1
chr2	8536683	SNV	1	G	A	16	47	34.0426	0.375	35.875	Gene: g2737, mRNA: g2737, Three_prime_utr: PAC:26900493.three_prime_UTR.1
chr8	347994	SNV	1	C	G	17	50	34	0.176471	36.2353	Gene: g8386, mRNA: g8386, Three_prime_utr: PAC:26888474.three_prime_UTR.1
chr9	2355990	Deletion	3	GCG	-	96	283	33.9223	0.447917	33.5208	Gene: Cre09.g392000, Gene: g9452, Five_prime_utr: PAC:26895953.five_prime_UTR.1, Five_prime_utr: PAC:26895952.five_prime_UTR.1, mRNA: Cre09.g392000, mRNA: g9452			exocyst complex component sec3A
chr11	92479	SNV	1	G	A	21	62	33.871	0.333333	36.8095	Gene: g11464, mRNA: g11464, Three_prime_utr: PAC:26890493.three_prime_UTR.1
chr14	2646323	SNV	1	A	T	22	65	33.8462	0.434783	34.8261	Gene: Cre14.g626300, mRNA: Cre14.g626300, Three_prime_utr: PAC:26890799.three_prime_UTR.1
chr11	715633	SNV	1	T	C	7	21	33.3333	0.142857	36.8571	Gene: g11558, Five_prime_utr: PAC:26890436.five_prime_UTR.1, mRNA: g11558
chr16	6975875	SNV	1	C	A	9	27	33.3333	0.444444	35	Gene: g16748, mRNA: g16748, Three_prime_utr: PAC:26891848.three_prime_UTR.1
chr16	6975887	SNV	1	C	T	8	24	33.3333	0.5	36.375	Gene: g16748, mRNA: g16748, Three_prime_utr: PAC:26891848.three_prime_UTR.1
scaffold_23	19311	SNV	1	C	A	8	24	33.3333	0.454545	36.8182	Gene: g18231, mRNA: g18231, Three_prime_utr: PAC:26888778.three_prime_UTR.1
scaffold_44	4699	SNV	1	C	T	23	69	33.3333	0.391304	37.7391	Gene: g18392, Three_prime_utr: PAC:26892952.three_prime_UTR.1, mRNA: g18392
chr6	6373957	SNV	1	G	A	32	96	33.3333	0.46875	35.0625	Gene: g6770, mRNA: g6770, Three_prime_utr: PAC:26894131.three_prime_UTR.1
chr10	5784751	SNV	1	C	G	29	88	32.9545	0.482759	33.6207	Gene: g11310, mRNA: g11310, Three_prime_utr: PAC:26904797.three_prime_UTR.1
chr15	490444	SNV	1	C	T	22	67	32.8358	0.272727	36.9091	Gene: g15357, mRNA: g15357, Three_prime_utr: PAC:26898114.three_prime_UTR.1
chr15	489219	Insertion	2	-	GA	18	55	32.7273	0.333333	34.4167	Gene: Cre15.g636650, mRNA: Cre15.g636650, Three_prime_utr: PAC:26898241.three_prime_UTR.1
chr15	489230	SNV	1	G	T	16	49	32.6531	0.4375	34.25	Gene: Cre15.g636650, mRNA: Cre15.g636650, Three_prime_utr: PAC:26898241.three_prime_UTR.1
chr10	5784743	SNV	1	G	C	31	95	32.6316	0.483871	33.5161	Gene: g11310, mRNA: g11310, Three_prime_utr: PAC:26904797.three_prime_UTR.1
chr6	2845815	SNV	1	A	T	40	124	32.2581	0.225	34.825	Gene: Cre06.g271800, Gene: g6099, mRNA: Cre06.g271800, mRNA: g6099, Three_prime_utr: PAC:26892966.three_prime_UTR.2, Three_prime_utr: PAC:26892965.three_prime_UTR.1
chr14	2646112	SNV	1	T	C	10	31	32.2581	0.2	36.2	Gene: Cre14.g626300, mRNA: Cre14.g626300, Three_prime_utr: PAC:26890799.three_prime_UTR.1
chr6	6373969	SNV	1	A	G	29	90	32.2222	0.448276	33.8621	Gene: g6770, mRNA: g6770, Three_prime_utr: PAC:26894131.three_prime_UTR.1
chr2	8200642	Deletion	1	C	-	27	84	32.1429	0.333333	32.963	Gene: g2693, mRNA: g2693, Three_prime_utr: PAC:26900314.three_prime_UTR.1
chr17	4849782	Insertion	1	-	A	17	53	32.0755	0.294118	36.5882	Gene: g17748, Gene: g17749, Five_prime_utr: PAC:26896380.five_prime_UTR.1, mRNA: g17748, mRNA: g17749, Three_prime_utr: PAC:26896832.three_prime_UTR.1
chr15	107812	SNV	1	A	G	8	25	32	0.375	37.125	Gene: g15309, mRNA: g15309, Three_prime_utr: PAC:26898347.three_prime_UTR.1
chr2	3059535	SNV	1	G	A	8	25	32	0.375	35.25	Gene: g1822, Five_prime_utr: PAC:26899530.five_prime_UTR.1, mRNA: g1822
chr3	3501316	SNV	1	G	A	8	25	32	0.25	35.25	Gene: g3444, mRNA: g3444, Three_prime_utr: PAC:26902850.three_prime_UTR.1
chr14	522255	SNV	1	A	G	59	185	31.8919	0.389831	35.0508	Gene: Cre14.g611450, mRNA: Cre14.g611450, Three_prime_utr: PAC:26890822.three_prime_UTR.1
chr15	248626	Deletion	1	C	-	7	22	31.8182	0.428571	32.2857	Gene: Cre15.g640800, mRNA: Cre15.g640800, Three_prime_utr: PAC:26898121.three_prime_UTR.2			Homeodomain-like superfamily protein
chr16	6975890	SNV	1	A	C	7	22	31.8182	0.428571	37.4286	Gene: g16748, mRNA: g16748, Three_prime_utr: PAC:26891848.three_prime_UTR.1
chr2	3059556	SNV	1	G	T	7	22	31.8182	0.428571	34.4286	Gene: g1822, Five_prime_utr: PAC:26899530.five_prime_UTR.1, mRNA: g1822
chr5	1267345	SNV	1	G	T	40	126	31.746	0.45	33.1	Gene: g5228, Five_prime_utr: PAC:26897727.five_prime_UTR.1, Five_prime_utr: PAC:26897728.five_prime_UTR.1, mRNA: g5228, mRNA: g5228			Glycosyl hydrolase family protein with chitinase insertion domain
chr15	489220	Insertion	1	-	G	18	57	31.5789	0.333333	36.1667	Gene: Cre15.g636650, mRNA: Cre15.g636650, Three_prime_utr: PAC:26898241.three_prime_UTR.1
chr10	3455170	Deletion	10	CGCGTGTAAC	-	23	73	31.5068	0.217391	35.9565	Gene: g10934, Five_prime_utr: PAC:26904952.five_prime_UTR.1, mRNA: g10934
chr15	1455484	SNV	1	T	C	11	35	31.4286	0.25	36.0833	Gene: g15491, Five_prime_utr: PAC:26898349.five_prime_UTR.1, mRNA: g15491
chr10	5784737	SNV	1	T	G	31	99	31.3131	0.451613	33.6452	Gene: g11310, mRNA: g11310, Three_prime_utr: PAC:26904797.three_prime_UTR.1
chr3	821039	SNV	1	C	A	35	113	30.9735	0.0571429	35.1429	Gene: g2986, mRNA: g2986, Three_prime_utr: PAC:26902284.three_prime_UTR.1
chr4	2335371	SNV	1	A	T	17	55	30.9091	0	37.2941	Gene: Cre04.g220751, mRNA: Cre04.g220751, Three_prime_utr: PAC:26905963.three_prime_UTR.1
scaffold_44	4675	SNV	1	T	C	21	68	30.8824	0.5	37.2727	Gene: g18392, Three_prime_utr: PAC:26892952.three_prime_UTR.1, mRNA: g18392
chr2	5660005	Deletion	1	T	-	8	26	30.7692	0	37.375	Gene: Cre02.g109650, mRNA: Cre02.g109650, Three_prime_utr: PAC:26901052.three_prime_UTR.1			BEL1-like homeodomain 10
chr2	6172009	SNV	1	A	T	8	26	30.7692	0.5	33.125	Gene: Cre02.g113700, mRNA: Cre02.g113700, Three_prime_utr: PAC:26899975.three_prime_UTR.1
chr14	1284275	Deletion	4	GCCC	-	12	39	30.7692	0.333333	30.5	Gene: Cre14.g616650, mRNA: Cre14.g616650, Three_prime_utr: PAC:26891186.three_prime_UTR.2
chr4	3873176	SNV	1	A	G	11	36	30.5556	0.272727	37.1364	Gene: g5041, mRNA: g5041, Three_prime_utr: PAC:26906141.three_prime_UTR.1			VH1-interacting kinase
chr12	901509	SNV	1	A	G	22	72	30.5556	0.478261	36.3913	Gene: g12148, mRNA: g12148, Three_prime_utr: PAC:26907483.three_prime_UTR.1
chr4	3873177	SNV	1	A	G	11	36	30.5556	0.272727	37.1364	Gene: g5041, mRNA: g5041, Three_prime_utr: PAC:26906141.three_prime_UTR.1
scaffold_27	15905	Deletion	1	A	-	7	23	30.4348	0	35.2857	Gene: g18301, Five_prime_utr: PAC:26901090.five_prime_UTR.1, mRNA: g18301
chr4	2331072	Deletion	3	AGC	-	10	33	30.303	0.5	33.9	Gene: Cre04.g220750, mRNA: Cre04.g220750, Three_prime_utr: PAC:26905548.three_prime_UTR.1
chr15	489243	SNV	1	G	T	10	33	30.303	0.4	35.9	Gene: Cre15.g636650, mRNA: Cre15.g636650, Three_prime_utr: PAC:26898241.three_prime_UTR.1
chr15	489244	SNV	1	G	T	10	33	30.303	0.4	35.9	Gene: Cre15.g636650, mRNA: Cre15.g636650, Three_prime_utr: PAC:26898241.three_prime_UTR.1
chr8	40490	Deletion	1	C	-	13	43	30.2326	0.461538	29.9231	Gene: Cre08.g358459, mRNA: Cre08.g358459, Three_prime_utr: PAC:26887941.three_prime_UTR.1
chr14	2646318	SNV	1	C	A	21	70	30	0.409091	35.8636	Gene: Cre14.g626300, mRNA: Cre14.g626300, Three_prime_utr: PAC:26890799.three_prime_UTR.1
chr2	3059521	SNV	1	G	A	6	20	30	0.333333	35	Gene: g1822, Five_prime_utr: PAC:26899530.five_prime_UTR.1, mRNA: g1822
chr10	5784759	SNV	1	A	C	22	74	29.7297	0.363636	34.2727	Gene: g11310, mRNA: g11310, Three_prime_utr: PAC:26904797.three_prime_UTR.1
chr15	489249	SNV	1	T	G	8	27	29.6296	0.375	34.375	Gene: Cre15.g636650, mRNA: Cre15.g636650, Three_prime_utr: PAC:26898241.three_prime_UTR.1
chr2	8196771	SNV	1	T	C	8	27	29.6296	0	37.75	Gene: g2692, mRNA: g2692, Three_prime_utr: PAC:26899558.three_prime_UTR.1
chr2	8197214	SNV	1	A	G	8	27	29.6296	0.222222	36.4444	Gene: g2692, mRNA: g2692, Three_prime_utr: PAC:26899558.three_prime_UTR.1
chr14	522265	SNV	1	A	T	53	179	29.6089	0.433962	35.4717	Gene: Cre14.g611450, mRNA: Cre14.g611450, Three_prime_utr: PAC:26890822.three_prime_UTR.1
chr9	635736	SNV	1	T	C	13	44	29.5455	0.307692	35.6154	Gene: Cre09.g403350, mRNA: Cre09.g403350, Three_prime_utr: PAC:26895964.three_prime_UTR.1
scaffold_21	77977	SNV	1	T	A	43	146	29.4521	0.363636	36.0227	Gene: g18174, mRNA: g18174, Three_prime_utr: PAC:26906212.three_prime_UTR.1
chr14	522219	SNV	1	C	T	52	177	29.3785	0.442308	36.6154	Gene: Cre14.g611450, mRNA: Cre14.g611450, Three_prime_utr: PAC:26890822.three_prime_UTR.1
chr11	8606	SNV	1	A	C	7	24	29.1667	0.142857	38	Gene: g11451, mRNA: g11451, Three_prime_utr: PAC:26890622.three_prime_UTR.1			RNA binding;RNA-directed DNA polymerases
chr3	7122890	SNV	1	G	T	7	24	29.1667	0.285714	37.2143	Gene: g4137, Five_prime_utr: PAC:26902122.five_prime_UTR.1, mRNA: g4137
chr3	7122892	SNV	1	T	G	7	24	29.1667	0.285714	37.2143	Gene: g4137, Five_prime_utr: PAC:26902122.five_prime_UTR.1, mRNA: g4137
chr5	2356356	SNV	1	C	G	7	24	29.1667	0.142857	38.2143	Gene: g5400, Gene: g5401, mRNA: g5400, mRNA: g5401, Three_prime_utr: PAC:26898004.three_prime_UTR.1, Three_prime_utr: PAC:26897704.three_prime_UTR.1
chr8	3004161	SNV	1	C	T	21	72	29.1667	0	38.4762	Gene: g8777, mRNA: g8777, Three_prime_utr: PAC:26888343.three_prime_UTR.1
chr7	5456193	SNV	1	A	G	9	31	29.0323	0.3	35.6	Gene: Cre07.g350600, mRNA: Cre07.g350600, Three_prime_utr: PAC:26888973.three_prime_UTR.1
chr4	2331053	SNV	1	C	G	10	35	28.5714	0.5	35.4	Gene: Cre04.g220750, mRNA: Cre04.g220750, Three_prime_utr: PAC:26905548.three_prime_UTR.1
chr9	881819	Insertion	2	-	AC	6	21	28.5714	0.333333	36.25	Gene: Cre09.g401450, mRNA: Cre09.g401450, Three_prime_utr: PAC:26894905.three_prime_UTR.1
scaffold_23	64222	SNV	1	C	A	10	35	28.5714	0.5	35.5	Gene: g18241, mRNA: g18241, Three_prime_utr: PAC:26888798.three_prime_UTR.1
chr16	1803444	SNV	1	A	G	39	138	28.2609	0.25	35.15	Gene: g15841, mRNA: g15841, Three_prime_utr: PAC:26892244.three_prime_UTR.1
scaffold_22	5365	SNV	1	G	A	29	103	28.1553	0	36.1034	Gene: g18200, Five_prime_utr: PAC:26892872.five_prime_UTR.1, mRNA: g18200
chr17	6062355	Deletion	1	G	-	7	25	28	0.285714	29.5714	Gene: g17926, mRNA: g17926, mRNA: g17926, Three_prime_utr: PAC:26896905.three_prime_UTR.1, Three_prime_utr: PAC:26896906.three_prime_UTR.1			Leucine-rich receptor-like protein kinase family protein
chr4	811905	SNV	1	C	T	22	79	27.8481	0.136364	34.9545	Gene: g4606, mRNA: g4606, Three_prime_utr: PAC:26906172.three_prime_UTR.1
chr4	811906	SNV	1	C	T	22	79	27.8481	0.136364	34.9545	Gene: g4606, mRNA: g4606, Three_prime_utr: PAC:26906172.three_prime_UTR.1
chr3	8352142	SNV	1	A	C	13	47	27.6596	0.307692	36.6154	Gene: Cre03.g198800, Five_prime_utr: PAC:26902141.five_prime_UTR.2, mRNA: Cre03.g198800
chr13	1432467	SNV	1	T	C	8	29	27.5862	0.5	35.125	Gene: Cre13.g572100, mRNA: Cre13.g572100, Three_prime_utr: PAC:26898782.three_prime_UTR.1
chr12	5808221	SNV	1	T	C	6	22	27.2727	0	39.6667	Gene: Cre12.g533500, mRNA: Cre12.g533500, Three_prime_utr: PAC:26906359.three_prime_UTR.1
chr2	9074428	SNV	1	G	T	9	33	27.2727	0	37.7778	Gene: g2824, mRNA: g2824, Three_prime_utr: PAC:26900537.three_prime_UTR.1
chr7	4631686	SNV	1	C	T	12	44	27.2727	0.25	34.8333	Gene: g8011, mRNA: g8011, Three_prime_utr: PAC:26889070.three_prime_UTR.1
chr7	4631688	SNV	1	A	G	12	44	27.2727	0.25	34.8333	Gene: g8011, mRNA: g8011, Three_prime_utr: PAC:26889070.three_prime_UTR.1
chr6	6373989	SNV	1	G	A	17	63	26.9841	0.176471	34.2941	Gene: g6770, mRNA: g6770, Three_prime_utr: PAC:26894131.three_prime_UTR.1
chr2	5660005	SNV	1	T	G	7	26	26.9231	0.428571	35.2857	Gene: Cre02.g109650, mRNA: Cre02.g109650, Three_prime_utr: PAC:26901052.three_prime_UTR.1
chr16	631988	SNV	1	G	T	7	26	26.9231	0	33.1429	Gene: Cre16.g692000, mRNA: Cre16.g692000, Three_prime_utr: PAC:26891652.three_prime_UTR.1
scaffold_21	86181	Insertion	1	-	G	7	26	26.9231	0.142857	35.4286	Gene: g18177, mRNA: g18177, Three_prime_utr: PAC:26906232.three_prime_UTR.1
scaffold_18	24329	SNV	1	C	T	22	82	26.8293	0.272727	35.6818	Gene: g18081, mRNA: g18081, Three_prime_utr: PAC:26898419.three_prime_UTR.1
scaffold_18	24330	SNV	1	C	T	22	82	26.8293	0.272727	35.6818	Gene: g18081, mRNA: g18081, Three_prime_utr: PAC:26898419.three_prime_UTR.1
chr3	8352704	SNV	1	C	G	16	60	26.6667	0.411765	36.1765	Gene: Cre03.g198800, Five_prime_utr: PAC:26902141.five_prime_UTR.1, mRNA: Cre03.g198800
chr2	6618268	SNV	1	A	C	16	60	26.6667	0.294118	37.4706	Gene: g2431, mRNA: g2431, Three_prime_utr: PAC:26900855.three_prime_UTR.2
chr12	151115	SNV	1	G	T	47	177	26.5537	0.137255	36.098	Gene: Cre12.g484450, Five_prime_utr: PAC:26906549.five_prime_UTR.1, mRNA: Cre12.g484450
chr2	126540	SNV	1	G	C	22	83	26.506	0.363636	36.2727	Gene: Cre02.g074150, Gene: g1315, mRNA: Cre02.g074150, mRNA: g1315, Three_prime_utr: PAC:26900069.three_prime_UTR.1, Three_prime_utr: PAC:26900068.three_prime_UTR.1			histidine kinase 1
chr2	8065977	SNV	1	G	A	20	76	26.3158	0.190476	35.0476	Gene: g2687, Gene: g2688, mRNA: g2687, mRNA: g2687, mRNA: g2687, mRNA: g2688, mRNA: g2688, Three_prime_utr: PAC:26899741.three_prime_UTR.5, Three_prime_utr: PAC:26899742.three_prime_UTR.5
chr9	6941675	SNV	1	T	A	24	92	26.087	0.0416667	33.7917	Gene: g10169, mRNA: g10169, Three_prime_utr: PAC:26895066.three_prime_UTR.1			Homeodomain-like superfamily protein
chr6	7030295	Deletion	1	A	-	7	27	25.9259	0.142857	27.5714	Gene: Cre06.g296900, Five_prime_utr: PAC:26894171.five_prime_UTR.1, mRNA: Cre06.g296900
chr15	490593	SNV	1	C	G	7	27	25.9259	0	36	Gene: g15357, mRNA: g15357, Three_prime_utr: PAC:26898114.three_prime_UTR.1
chr9	7849713	Deletion	1	C	-	15	58	25.8621	0.4	28.5333	Gene: Cre09.g416750, mRNA: Cre09.g416750, Three_prime_utr: PAC:26895920.three_prime_UTR.1			TCP-1/cpn60 chaperonin family protein
chr3	2365409	SNV	1	G	T	8	31	25.8065	0	36.75	Gene: Cre03.g158550, mRNA: Cre03.g158550, Three_prime_utr: PAC:26901740.three_prime_UTR.1			chromatin remodeling factor CHD3 (PICKLE)
chr2	8064028	SNV	1	A	T	16	62	25.8065	0.1875	35.125	Gene: g2687, Gene: g2688, mRNA: g2687, mRNA: g2687, mRNA: g2687, mRNA: g2688, mRNA: g2688, Three_prime_utr: PAC:26899741.three_prime_UTR.6, Three_prime_utr: PAC:26899742.three_prime_UTR.6
chr10	5784770	SNV	1	G	A	17	66	25.7576	0.294118	35.7647	Gene: g11310, mRNA: g11310, Three_prime_utr: PAC:26904797.three_prime_UTR.1
chr10	5784729	SNV	1	C	A	28	109	25.6881	0.464286	33.8214	Gene: g11310, mRNA: g11310, Three_prime_utr: PAC:26904797.three_prime_UTR.1
chr16	724293	Deletion	1	G	-	20	78	25.641	0.4	33.15	Gene: Cre16.g691177, Gene: g15661, mRNA: Cre16.g691177, mRNA: g15661, Three_prime_utr: PAC:26891746.three_prime_UTR.1, Three_prime_utr: PAC:26891745.three_prime_UTR.1
[truncated: 130 more rows]

## Sheet: UTRs and DE - 25
id	log2FoldChange	padj		Annotation
[truncated: 25 more rows]

## Sheet: Intron - 469
Table S3. Distribution of single nucleotide polymorphisms (SNPs) and insertions-deletions (indels) in the comparison of DNA sequenced from the EL and PL populations and analysis of mutation rates in the EL cells.
[truncated: 470 more rows]

[truncated: 6 more sheets: CDS - 241, Synonymous - 92, Non-Synonymous - 149, Mutations in genome site class, Transition tranversion rates, Mutation rate]
