# Supplementary material for: Using Natural Selection to Explore the Adaptive Potential of Chlamydomonas reinhardtii
Source: PLoS One. 2014 Mar 21;9(3):e92533. doi: 10.1371/journal.pone.0092533 (PMC3962425; doi:10.1371/journal.pone.0092533)
Supplement: Table S4 — Results of RNA-seq analysis of the PL-EL populations of C. reinhardtii . (XLSX) [file pone.0092533.s009.xlsx]

## Sheet: PL-EL_Up
Table S4. Results of mRNA-seq analysis of the PL-EL populations of C. reinhardtii.
Gene id	BaseMean	BaseMeanA	BaseMeanB	foldChange	log2FoldChange	pval	padj	Annotation	Blast	Transporter family	TC number
Cre10.g447050.t1.1	1428.64	80.6169	2776.66	34.4427	5.10613	2.13442e-36	1.11545e-32		>XP_001698475 hypothetical protein CHLREDRAFT_182540 [Chlamydomonas reinhardtii].
Cre07.g353250.t1.2	612.381	29.6279	1195.13	40.3381	5.33407	4.80823e-35	1.88459e-31		>XP_001692501 predicted protein [Chlamydomonas reinhardtii].
Cre06.g248800.t1.2	702.618	39.6386	1365.6	34.4512	5.10648	1.12856e-32	3.5387e-29		>XP_001696672 predicted protein [Chlamydomonas reinhardtii].
Cre12.g528850.t1.1	2907.16	224.581	5589.74	24.8896	4.63747	1.33644e-31	3.49212e-28	thioredoxin H-type 9	>XP_001696860 flagellar outer dynein arm 16 kDa light chain LC3 [Chlamydomonas reinhardtii].
Cre14.g626600.t1.3	202.569	8.94064	396.198	44.3143	5.4697	3.03031e-31	6.78703e-28	ubiquitin-specific protease 16	>XP_001692809 predicted protein [Chlamydomonas reinhardtii].
g1745.t1	95.2419	0	190.484	Inf	Inf	5.76413e-31	1.12963e-27
Cre12.g527800.t1.1	1668.41	132.579	3204.24	24.1686	4.59506	1.42742e-30	2.48656e-27	Dynein light chain type 1 family protein	>XP_001696870 dynein light chain, type 1 [Chlamydomonas reinhardtii].
Cre01.g031250.t1.2	2185.53	181.622	4189.45	23.0669	4.52775	7.84935e-30	1.23062e-26	Protein of unknown function (DUF1279)	>XP_001689589 predicted protein [Chlamydomonas reinhardtii].
Cre16.g670200.t1.2	879.687	73.7951	1685.58	22.8413	4.51358	1.70892e-28	2.2327e-25	postsynaptic protein-related	>XP_001699177 CRIPT protein [Chlamydomonas reinhardtii].
Cre08.g373435.t1.2	950.431	57.4772	1843.38	32.0716	5.00322	4.4392e-28	5.35368e-25
Cre17.g724550.t1.2	3057.87	316.384	5799.35	18.3301	4.19614	3.76371e-27	4.21481e-24		>XP_001697145 deflagellation inducible protein [Chlamydomonas reinhardtii].
Cre02.g074550.t1.2	1289.87	147.892	2431.85	16.4434	4.03944	4.5319e-25	4.73675e-22		>XP_001701625 predicted protein [Chlamydomonas reinhardtii].
Cre02.g089950.t1.2	1257.14	152.59	2361.69	15.4774	3.95209	2.03661e-24	1.99562e-21		>XP_001701966 intraflagellar transport particle protein 20 [Chlamydomonas reinhardtii].
Cre01.g042200.t1.1	15188.5	2145.48	28231.4	13.1586	3.71793	4.87949e-23	4.25004e-20		>XP_001690159 predicted protein [Chlamydomonas reinhardtii].
Cre07.g333900.t1.1	3964.99	567.407	7362.58	12.9758	3.69775	5.86921e-22	4.30781e-19	Cox19-like CHCH family protein	>XP_001700114 NADH:ubiquinone oxidoreductase 12.5 kDa subunit [Chlamydomonas reinhardtii].	H+ or Na+-translocating NADH dehydrogenase (NDH) family.	3.D.1.6.4
Cre01.g006700.t1.2	159.78	12.4918	307.068	24.5815	4.6195	7.15283e-22	4.67258e-19	RNA binding;RNA-directed DNA polymerases	>BAA25763 reverse transcriptase [Chlorella vulgaris].
g12883.t1	3397.36	342.944	6451.77	18.8129	4.23365	7.02349e-22	4.67258e-19	prefoldin 5	>XP_001697029 hypothetical protein CHLREDRAFT_105267, partial [Chlamydomonas reinhardtii].
Cre09.g403900.t1.2	4384.78	631.831	8137.73	12.8796	3.68702	1.38073e-21	8.65881e-19		>XP_001695239 flagellar associated protein [Chlamydomonas reinhardtii].
Cre12.g515850.t1.2	4731.3	599.337	8863.27	14.7884	3.8864	1.71528e-21	1.03431e-18	proliferating cellular nuclear antigen 1	>XP_001703230 PCNA proliferating cell nuclear antigen [Chlamydomonas reinhardtii].
g1746.t1	56.5921	0.853388	112.331	131.629	7.04034	3.4181e-21	1.98478e-18
Cre07.g325600.t1.2	212.35	20.8648	403.835	19.3549	4.27463	4.56954e-21	2.55862e-18	glutaredoxin 4	>XP_001700896 glutaredoxin, CGFS type [Chlamydomonas reinhardtii].
Cre01.g014600.t1.2	1038.32	167.569	1909.07	11.3927	3.51004	5.7275e-21	3.0964e-18	casein kinase I-like 8	>XP_001693999 ser/thr kinase [Chlamydomonas reinhardtii].
Cre12.g536100.t1.2	1210.27	188.672	2231.86	11.8294	3.5643	6.32324e-21	3.09799e-18		>XP_001692883 flagellar associated protein [Chlamydomonas reinhardtii].
Cre13.g571150.t1.2	6510.43	1066.59	11954.3	11.2079	3.48645	6.16646e-21	3.09799e-18		>XP_001693474 NADH:ubiquinone oxidoreductase 10 kDa subunit [Chlamydomonas reinhardtii].
Cre07.g349350.t1.2	24846.6	3936.81	45756.4	11.6227	3.53887	6.59182e-21	3.13172e-18		>XP_001692585 predicted protein [Chlamydomonas reinhardtii].
Cre13.g568250.t1.3	129.176	11.6497	246.703	21.1768	4.40441	1.26532e-20	5.68426e-18		>XP_001693705 predicted protein [Chlamydomonas reinhardtii].
Cre13.g567700.t1.2	11968.3	1951.29	21985.3	11.2671	3.49404	1.26897e-20	5.68426e-18	histone H2A protein 9	>XP_001693700 histone H2A variant [Chlamydomonas reinhardtii].
Cre05.g240450.t1.2	291.219	36.455	545.983	14.9769	3.90467	1.3332e-20	5.8061e-18		>XP_001697705 hypothetical protein CHLREDRAFT_192727 [Chlamydomonas reinhardtii].
Cre02.g077500.t1.2	1530.05	214.444	2845.66	13.2699	3.73009	1.99533e-20	8.45481e-18	SNARE-like superfamily protein	>XP_001701650 component of TRAPP complex [Chlamydomonas reinhardtii].
g18165.t1	315.749	39.4175	592.081	15.0208	3.90889	2.22809e-20	9.19262e-18
Cre17.g701800.t1.3	85.3777	5.3677	165.388	30.8117	4.9454	8.32312e-20	3.34589e-17		>XP_001703103 hypothetical protein CHLREDRAFT_154659, partial [Chlamydomonas reinhardtii].
Cre12.g515150.t1.2	1153.32	190.368	2116.27	11.1167	3.47466	9.24717e-20	3.62443e-17	Domain of unknown function (DUF543)	>XP_001702986 predicted protein [Chlamydomonas reinhardtii].
g18212.t1	75.9031	5.56545	146.241	26.2766	4.7157	1.42497e-19	5.44894e-17		>XP_001700661 predicted protein [Chlamydomonas reinhardtii].
g9972.t1	219.215	24.5746	413.855	16.8408	4.07389	3.23827e-19	1.2088e-16	Iron-sulphur cluster biosynthesis family protein	>XP_001697636 iron-sulfur cluster assembly protein [Chlamydomonas reinhardtii].
g18371.t1	125.628	13.0098	238.246	18.3128	4.19478	3.90813e-19	1.42492e-16		>XP_001691171 hypothetical protein CHLREDRAFT_180865 [Chlamydomonas reinhardtii].
Cre13.g572100.t1.3	664.604	14.9407	1314.27	87.9656	6.45887	5.74249e-19	2.04615e-16		>XP_002949179 hypothetical protein VOLCADRAFT_89630 [Volvox carteri f. nagariensis].
Cre10.g458450.t1.3	10503.8	1993.37	19014.2	9.53875	3.2538	8.26019e-19	2.87785e-16	glutathione peroxidase 5	>XP_001698575 glutathione peroxidase [Chlamydomonas reinhardtii].
Cre09.g408350.t1.2	184.136	25.5068	342.766	13.4382	3.74827	1.84245e-18	6.27957e-16		>XP_001696676 hypothetical protein CHLREDRAFT_175330, partial [Chlamydomonas reinhardtii].
g11587.t1	36.3312	0	72.6623	Inf	Inf	1.88383e-18	6.28398e-16
g16122.t1	7431.02	1172.51	13689.5	11.6754	3.5454	2.24888e-18	7.19551e-16	mitochondrial acyl carrier protein 2	>XP_001699275 acyl-carrier protein [Chlamydomonas reinhardtii].	H+ or Na+-translocating NADH dehydrogenase (NDH) family.	3.D.1.6.4
Cre12.g548955.t1.2	86.283	7.21133	165.355	22.9298	4.51915	4.4126e-18	1.38361e-15
Cre16.g653850.t1.1	449.121	94.7981	803.444	8.47532	3.08327	4.64355e-18	1.42748e-15	CSL zinc finger domain-containing protein	>XP_001698139 hypothetical protein CHLREDRAFT_120707, partial [Chlamydomonas reinhardtii].
Cre10.g441950.t1.2	2172.68	270.792	4074.58	15.0469	3.91139	2.39456e-17	6.8258e-15	Small nuclear ribonucleoprotein family protein	>XP_001690345 Sm-D1 protein [Chlamydomonas reinhardtii].
Cre02.g085300.t1.2	1192.2	196.147	2188.26	11.1562	3.47977	2.38596e-17	6.8258e-15		>XP_001701726 predicted protein [Chlamydomonas reinhardtii].
g1640.t1	1629.98	293.58	2966.37	10.1041	3.33688	4.7553e-17	1.33132e-14
Cre13.g569000.t1.3	40.4637	1.31053	79.6169	60.7518	5.92485	5.1058e-17	1.40436e-14		>XP_001693714 predicted protein, partial [Chlamydomonas reinhardtii].
g8766.t1	2823.38	602.24	5044.53	8.37628	3.06631	5.86254e-17	1.58471e-14		>XP_001703807 predicted protein [Chlamydomonas reinhardtii].
Cre10.g447000.t1.2	1610.47	337.456	2883.49	8.54479	3.09504	7.55042e-17	2.00636e-14		>XP_002956218 hypothetical protein VOLCADRAFT_107105 [Volvox carteri f. nagariensis].
Cre01.g027900.t1.2	91.2617	11.6873	170.836	14.6173	3.8696	1.00455e-16	2.62488e-14	Abscisic acid-responsive (TB2/DP1, HVA22) family protein	>XP_002508804 predicted protein [Micromonas sp. RCC299].
g3738.t1	4322.35	929.548	7715.14	8.29988	3.05309	1.08232e-16	2.78174e-14	cyclin-dependent kinase-subunit 1	>XP_001703401 cyclin dependent kinase regulatory subunit [Chlamydomonas reinhardtii].
Cre04.g216826.t1.2	75.5738	7.50833	143.639	19.1307	4.25781	1.57533e-16	3.98354e-14
Cre17.g737000.t1.2	1239.18	262.54	2215.82	8.43994	3.07723	1.68988e-16	4.20538e-14		>XP_001699615 hypothetical protein CHLREDRAFT_159618, partial [Chlamydomonas reinhardtii].
Cre12.g553150.t1.2	137.961	21.6798	254.242	11.7271	3.55178	1.85719e-16	4.54952e-14
Cre07.g336800.t1.3	169.703	28.6174	310.788	10.8601	3.44096	2.31691e-16	5.58839e-14		>XP_001700092 predicted protein, partial [Chlamydomonas reinhardtii].
Cre12.g501200.t1.2	10364	2364.15	18363.8	7.76761	2.95747	2.51784e-16	5.98102e-14	E3 ubiquitin ligase SCF complex subunit SKP1/ASK1 family protein	>XP_001690964 E3 ubiquitin ligase [Chlamydomonas reinhardtii].
g8752.t1	3440.63	443.389	6437.87	14.5197	3.85994	3.42404e-16	8.01225e-14		>XP_001702096 hypothetical protein CHLREDRAFT_205720 [Chlamydomonas reinhardtii].
Cre03.g178150.t1.1	13394.4	3034.25	23754.6	7.82881	2.96879	4.38188e-16	9.9564e-14	calmodulin 6	>XP_001703420 calmodulin [Chlamydomonas reinhardtii].	nuclear pore complex (NPC) family.	9.A.14.1.1
Cre03.g206450.t1.2	3152.05	676.224	5627.88	8.32251	3.05702	7.70054e-16	1.70041e-13
g2889.t1	10633.3	1909.99	19356.7	10.1345	3.3412	7.99673e-16	1.74129e-13		>XP_001695746 hypothetical protein CHLREDRAFT_149911 [Chlamydomonas reinhardtii].
Cre16.g678150.t1.2	707.789	119.577	1296	10.8382	3.43805	9.08133e-16	1.95037e-13	Eukaryotic protein of unknown function (DUF872)	>XP_001772694 predicted protein, partial [Physcomitrella patens subsp. patens].
g18393.t1	7833.56	1521.95	14145.2	9.29413	3.21632	9.93217e-16	2.10428e-13
Cre02.g102162.t1.2	1316.37	212.031	2420.72	11.4168	3.51309	1.45486e-15	3.04123e-13		>XP_001700007 hypothetical protein CHLREDRAFT_166860 [Chlamydomonas reinhardtii].
g1290.t1	523.875	108.457	939.294	8.66051	3.11445	1.96987e-15	4.01087e-13	acetyl-CoA synthetase	>XP_001700210 acetyl CoA synthetase [Chlamydomonas reinhardtii].
Cre16.g683700.t1.2	404.166	87.6169	720.715	8.22576	3.04015	1.96481e-15	4.01087e-13		>XP_001692076 hypothetical protein CHLREDRAFT_189295 [Chlamydomonas reinhardtii].
g4854.t1	49.1899	3.68421	94.6957	25.7031	4.68387	2.07758e-15	4.17594e-13
Cre03.g197513.t1.2	126.122	19.1204	233.124	12.1924	3.60791	2.4821e-15	4.92587e-13	Low temperature and salt responsive protein family	>ZP_23802788 hypothetical protein ADICEAN_02060 [Cesiribacter andamanensis AMV16].
Cre03.g192050.t1.1	862.304	192.868	1531.74	7.94192	2.98949	3.13734e-15	6.1484e-13		>XP_001693245 iron permease, membrane protein [Chlamydomonas reinhardtii].	iron/lead transporter (ILT) superfamily.	9.A.10.1.6
Cre09.g400500.t1.3	391.186	89.7102	692.662	7.7211	2.94881	3.21108e-15	6.21523e-13		>XP_001695205 predicted protein [Chlamydomonas reinhardtii].
Cre12.g545050.t1.3	60.6759	7.24588	114.106	15.7477	3.97707	3.8114e-15	7.28721e-13	xanthine dehydrogenase 1	>XP_001694090 xanthine dehydrogenase/oxidase, partial [Chlamydomonas reinhardtii].
Cre01.g000450.t1.2	293.604	37.8476	549.361	14.5151	3.85948	4.00544e-15	7.56595e-13	xyloglucanase 113	>XP_001700329 predicted protein [Chlamydomonas reinhardtii].
g9682.t1	1018.07	138.628	1897.52	13.6879	3.77483	4.95485e-15	9.0328e-13		>XP_001694947 flagellar associated protein [Chlamydomonas reinhardtii].
Cre16.g669450.t1.3	98.854	13.7407	183.967	13.3885	3.74292	5.0212e-15	9.04855e-13	ATP-dependent protease La (LON) domain protein	>XP_001699171 hypothetical protein CHLREDRAFT_177887 [Chlamydomonas reinhardtii].
Cre06.g278850.t1.1	93.5481	16.3993	170.697	10.4088	3.37973	1.21773e-14	2.09797e-12	Mnd1 family protein	>XP_001695418 GAJ-like protein, partial [Chlamydomonas reinhardtii].
Cre15.g643700.t1.3	199.149	35.7717	362.527	10.1345	3.3412	1.97371e-14	3.29189e-12		>XP_001700712 hypothetical protein CHLREDRAFT_20566 [Chlamydomonas reinhardtii].
g4121.t1	47.3832	4.92183	89.8447	18.2543	4.19017	2.53983e-14	4.19152e-12		>XP_001692531 predicted protein, partial [Chlamydomonas reinhardtii].
g8361.t1	33.6315	1.03987	66.2231	63.6841	5.99286	3.92184e-14	6.33883e-12		>XP_001691502 hypothetical protein CHLREDRAFT_181583, partial [Chlamydomonas reinhardtii].
Cre13.g564400.t1.2	828.657	87.0177	1570.3	18.0457	4.17358	4.06615e-14	6.505e-12		>XP_001693673 flagellar associated protein [Chlamydomonas reinhardtii].
Cre16.g683150.t1.2	6488.27	866.095	12110.4	13.9828	3.80558	4.47462e-14	7.01531e-12		>XP_001692071 hypothetical protein CHLREDRAFT_183330 [Chlamydomonas reinhardtii].
Cre12.g483850.t1.2	3602.84	851.71	6353.97	7.46025	2.89922	4.46092e-14	7.01531e-12
Cre03.g183050.t1.2	1042.72	185.189	1900.25	10.2611	3.35912	4.74482e-14	7.36527e-12		>XP_001702923 predicted protein [Chlamydomonas reinhardtii].
Cre01.g006550.t1.3	27.2771	0.346623	54.2076	156.388	7.28898	5.8329e-14	8.87846e-12		>XP_001694813 predicted protein [Chlamydomonas reinhardtii].
Cre16.g652000.t1.3	1093.22	288.381	1898.05	6.58175	2.71847	6.93194e-14	1.04499e-11		>XP_001698230 hypothetical protein CHLREDRAFT_151619 [Chlamydomonas reinhardtii].
g15315.t1	76.832	10.1294	143.535	14.1701	3.82478	7.00686e-14	1.04622e-11
g11651.t1	167.45	37.1332	297.767	8.0189	3.00341	1.01653e-13	1.5035e-11		>XP_001701200 hypothetical protein CHLREDRAFT_194235 [Chlamydomonas reinhardtii].
Cre05.g238650.t1.3	1928.23	512.399	3344.06	6.52628	2.70626	1.18732e-13	1.70778e-11		>ABA41403 pherophorin-C5 protein precursor [Chlamydomonas reinhardtii].
g16743.t1	134.013	27.1437	240.882	8.87432	3.14964	1.33681e-13	1.88815e-11	ACT-like protein tyrosine kinase family protein	>XP_001695775 hypothetical protein CHLREDRAFT_149057 [Chlamydomonas reinhardtii].
Cre06.g251150.t1.2	3330.26	710.654	5949.87	8.37239	3.06564	1.41779e-13	1.98466e-11	one-helix protein 2	>XP_001696654 low CO2 and stress-induced one-helix protein [Chlamydomonas reinhardtii].
g18279.t1	94.7229	2.11429	187.331	88.6025	6.46928	1.52706e-13	2.1187e-11
Cre07.g324500.t1.2	1055.32	312.561	1798.08	5.75274	2.52425	2.04039e-13	2.80607e-11		>XP_001700884 hypothetical protein CHLREDRAFT_187563 [Chlamydomonas reinhardtii].
Cre06.g291200.t1.2	664.016	83.9252	1244.11	14.824	3.88986	2.85926e-13	3.89804e-11		>XP_001695403 predicted protein [Chlamydomonas reinhardtii].
Cre03.g200950.t1.2	448.497	50.9754	846.019	16.5966	4.05282	3.99942e-13	5.40542e-11		>XP_001693366 flagellar associated protein [Chlamydomonas reinhardtii].
g14831.t1	59.9508	5.31807	114.584	21.5461	4.42935	4.86516e-13	6.51931e-11
Cre01.g031350.t1.2	49.931	6.94889	92.9131	13.3709	3.74103	5.33566e-13	7.07795e-11
Cre12.g552300.t1.2	321.92	94.374	549.466	5.82221	2.54157	5.37234e-13	7.07795e-11		>XP_001694140 predicted protein [Chlamydomonas reinhardtii].
Cre10.g441900.t1.3	244.708	55.0868	434.33	7.88446	2.97901	5.74793e-13	7.50967e-11		>XP_001690526 flagellar associated protein [Chlamydomonas reinhardtii].
Cre06.g308750.t1.2	944.769	206.121	1683.42	8.16712	3.02983	5.81544e-13	7.53509e-11		>XP_001691357 predicted protein [Chlamydomonas reinhardtii].
Cre16.g682700.t1.2	259.287	60.3146	458.26	7.59784	2.92559	8.29567e-13	1.05739e-10		>XP_001691908 hypothetical protein CHLREDRAFT_156942 [Chlamydomonas reinhardtii].
Cre13.g588150.t1.2	1203.47	241.37	2165.57	8.97197	3.16543	1.0201e-12	1.28976e-10	galactose-1-phosphate guanylyltransferase (GDP)s;GDP-D-glucose phosphorylases;quercetin 4\'-O-glucosyltransferases	>AEZ51834 GDP-galactose:glucose-1-phosphate guanyltransferase [Chlamydomonas reinhardtii].
Cre01.g013100.t1.3	2513.36	521.088	4505.63	8.64658	3.11213	1.04123e-12	1.30595e-10	pathogenesis-related gene 1	>XP_001689887 predicted extracellular protein [Chlamydomonas reinhardtii].
g5607.t1	1860.54	350.8	3370.27	9.60738	3.26414	1.07019e-12	1.33163e-10	UNC-50 family protein	>XP_001696427 UNC-50 family protein [Chlamydomonas reinhardtii].
Cre12.g554750.t1.2	3765.8	421.131	7110.46	16.8842	4.0776	1.1827e-12	1.46002e-10	Ubiquitin-like superfamily protein	>XP_001694157 predicted protein [Chlamydomonas reinhardtii].
Cre01.g044050.t1.2	2629.33	345.652	4913.02	14.2138	3.82922	1.24829e-12	1.52896e-10	ATPase, V0 complex, subunit E	>EFN50581 hypothetical protein CHLNCDRAFT_135458 [Chlorella variabilis].
Cre09.g410050.t1.2	640.169	182.914	1097.42	5.99965	2.58488	1.36101e-12	1.65411e-10	ER-type Ca2+-ATPase 1	>XP_001696782 calcium transporting ATPase [Chlamydomonas reinhardtii].	P-type ATPase (P-ATPase) superfamily.	3.A.3.2.4
g9136.t1	528.187	125.809	930.565	7.39665	2.88687	1.4733e-12	1.74987e-10		>ELT91639 hypothetical protein CAPTEDRAFT_212548 [Capitella teleta].
g7780.t1	255.046	64.3326	445.76	6.92898	2.79264	1.46498e-12	1.74987e-10
g2086.t1	724.87	43.9618	1405.78	31.9772	4.99897	1.57834e-12	1.86054e-10		>BAF46279 hypothetical protein [Chlamydomonas reinhardtii].
g531.t1	115.696	12.9753	218.418	16.8334	4.07325	2.64681e-12	3.05123e-10	phosphate transporter 4;1	>XP_002952292 hypothetical protein VOLCADRAFT_92899 [Volvox carteri f. nagariensis].	major facilitator superfamily (MFS).	2.A.1.14.22
g18168.t1	56.8781	8.24815	105.508	12.7917	3.67714	2.9969e-12	3.42959e-10		>XP_001703060 predicted protein [Chlamydomonas reinhardtii].
g9138.t1	902.481	235.018	1569.94	6.68012	2.73987	3.21492e-12	3.65243e-10		>XP_001695169 predicted protein [Chlamydomonas reinhardtii].
Cre01.g029700.t1.2	1460.28	167.036	2753.52	16.4846	4.04304	3.42046e-12	3.83043e-10		>XP_001702289 hypothetical protein CHLREDRAFT_181290 [Chlamydomonas reinhardtii].
g1917.t1	406.339	115.026	697.652	6.06516	2.60055	3.678e-12	4.08962e-10		>XP_001701205 hypothetical protein CHLREDRAFT_194242 [Chlamydomonas reinhardtii].
g15956.t1	19.2369	0	38.4739	Inf	Inf	4.18371e-12	4.59984e-10
Cre07.g329650.t1.2	314.441	78.226	550.655	7.03929	2.81543	4.46749e-12	4.86398e-10		>XP_001690447 hypothetical protein CHLREDRAFT_161874 [Chlamydomonas reinhardtii].
g6277.t1	134.509	32.5986	236.42	7.25244	2.85847	4.53031e-12	4.89836e-10
Cre01.g028777.t1.2	179.807	20.7888	338.824	16.2984	4.02666	5.93014e-12	6.32467e-10
Cre01.g047750.t1.2	890.168	219.582	1560.75	7.10784	2.82941	6.78774e-12	7.19041e-10	Ribosomal protein L18ae/LX family protein	>XP_001689743 ribosomal protein L18a, component of cytosolic 80S ribosome and 60S large subunit [Chlamydomonas reinhardtii].
Cre10.g426000.t1.2	569.331	85.883	1052.78	12.2583	3.61569	7.84617e-12	8.25586e-10	Ubiquitin related modifier 1	>XP_001702729 ubiquitin-related modifier [Chlamydomonas reinhardtii].
Cre10.g431900.t1.2	55.8198	9.00534	102.634	11.397	3.51059	8.16237e-12	8.53131e-10		>XP_001702673 predicted protein [Chlamydomonas reinhardtii].
g4921.t1	50.5614	6.91433	94.2084	13.6251	3.76819	9.16521e-12	9.51604e-10
Cre07.g353900.t1.2	206.01	52.8349	359.185	6.79826	2.76517	2.12241e-11	2.17484e-09		>XP_001702045 predicted protein [Chlamydomonas reinhardtii].
g706.t1	1586.59	378.469	2794.71	7.38427	2.88446	2.15252e-11	2.19138e-09	Signal recognition particle, SRP9/SRP14 subunit	>XP_001690059 subunit of the signal recognition particle [Chlamydomonas reinhardtii].
Cre06.g308250.t1.2	957.512	244.021	1671	6.84777	2.77563	2.24217e-11	2.26792e-09	Ribosomal protein S4 (RPS4A) family protein	>XP_001691218 ribosomal protein S4, component of cytosolic 80S ribosome and 40S small subunit [Chlamydomonas reinhardtii].
Cre02.g092850.t1.2	942.957	188.675	1697.24	8.99555	3.16921	2.27128e-11	2.28263e-09	Outer arm dynein light chain 1 protein	>1M9L_A Chain A, Relaxation-Based Refined Structure Of Chlamydomonas Outer Arm Dynein Light Chain 1.
Cre01.g006850.t1.2	509.409	51.9206	966.898	18.6226	4.21898	3.44727e-11	3.44244e-09		>XP_001700319 predicted protein [Chlamydomonas reinhardtii].
Cre13.g588700.t1.2	1006.95	307.534	1706.36	5.54853	2.4721	3.70733e-11	3.6787e-09		>XP_001693888 predicted protein [Chlamydomonas reinhardtii].
Cre06.g311950.t1.3	203.726	58.5574	348.895	5.95816	2.57487	4.31319e-11	4.25297e-09	exostosin family protein	>XP_001691329 exostosin-like glycosyltransferase [Chlamydomonas reinhardtii].
Cre04.g225850.t1.2	538.302	172.688	903.915	5.23438	2.38802	4.49598e-11	4.4055e-09	vesicle-associated membrane protein 727	>XP_001692324 R-SNARE protein, VAMP72-family [Chlamydomonas reinhardtii].
g7550.t1	675.247	115.871	1234.62	10.6551	3.41347	4.7836e-11	4.65822e-09		>XP_001702883 predicted protein [Chlamydomonas reinhardtii].
g14472.t1	123.774	28.2137	219.335	7.77405	2.95867	4.83583e-11	4.68001e-09		>XP_001700172 predicted protein [Chlamydomonas reinhardtii].
Cre02.g105950.t1.2	1132.69	370.458	1894.93	5.11509	2.35476	5.11269e-11	4.9176e-09		>XP_001699752 flagellar associated protein [Chlamydomonas reinhardtii].
g8372.t1	3426.56	224.847	6628.26	29.479	4.88161	5.99901e-11	5.70015e-09	Ribosomal protein S14p/S29e family protein	>XP_001703723 ribosomal protein S29, component of cytosolic 80S ribosome and 40S small subunit [Chlamydomonas reinhardtii].
Cre08.g366700.t1.3	153.008	28.6325	277.384	9.68772	3.27616	6.51541e-11	6.11669e-09		>XP_001696056 hypothetical protein CHLREDRAFT_175628 [Chlamydomonas reinhardtii].
g2539.t1	416.343	109.093	723.592	6.63281	2.72962	6.487e-11	6.11669e-09
g8777.t1	24.2307	1.49701	46.9644	31.3722	4.97141	7.11256e-11	6.59826e-09		>XP_001702094 hypothetical protein CHLREDRAFT_181243, partial [Chlamydomonas reinhardtii].
Cre02.g109950.t1.2	2096.83	440.081	3753.58	8.52929	3.09243	7.38986e-11	6.81519e-09	one helix protein	>XP_001699943 single helix LHC light protein [Chlamydomonas reinhardtii].
Cre13.g579450.t1.3	41018.4	6302.36	75734.4	12.0168	3.58699	8.57829e-11	7.81922e-09		>XP_001693802 membrane transporter [Chlamydomonas reinhardtii].
Cre06.g291650.t1.2	265.799	43.7912	487.807	11.1394	3.4776	8.52973e-11	7.81922e-09	NDH-dependent cyclic electron flow 1	>XP_001695531 2Fe-2S ferredoxin [Chlamydomonas reinhardtii].
g8372.t2	357.018	23.734	690.303	29.085	4.8622	1.0679e-10	9.60999e-09	Ribosomal protein S14p/S29e family protein	>XP_001703723 ribosomal protein S29, component of cytosolic 80S ribosome and 40S small subunit [Chlamydomonas reinhardtii].
g4607.t1	49.5218	8.81886	90.2247	10.2309	3.35486	1.06518e-10	9.60999e-09		>XP_001692961 predicted protein [Chlamydomonas reinhardtii].
g7402.t1	124.649	23.0167	226.282	9.83123	3.29737	1.07268e-10	9.60999e-09
g6434.t1	78.6395	0.346623	156.932	452.746	8.82256	1.19497e-10	1.05846e-08	RNA binding;RNA-directed DNA polymerases	>XP_001692887 heat shock protein 70D [Chlamydomonas reinhardtii].
Cre03.g207100.t1.2	44.8451	5.13159	84.5586	16.478	4.04247	1.19419e-10	1.05846e-08		>XP_001693174 predicted protein [Chlamydomonas reinhardtii].
g12529.t1	57.5959	12.4767	102.715	8.23253	3.04134	1.25672e-10	1.1069e-08		>XP_001690790 hypothetical protein CHLREDRAFT_169610 [Chlamydomonas reinhardtii].
g2705.t1	1645.7	482.4	2809	5.82296	2.54175	1.43954e-10	1.26085e-08
g11775.t2	16.0809	0	32.1619	Inf	Inf	1.58337e-10	1.3715e-08
Cre07.g333500.t1.2	409.471	137.448	681.495	4.95821	2.30982	1.83435e-10	1.57153e-08		>XP_001691132 predicted protein [Chlamydomonas reinhardtii].
g18104.t1	29.1837	3.3143	55.0531	16.6108	4.05405	1.89764e-10	1.61691e-08		>XP_001697521 predicted protein [Chlamydomonas reinhardtii].
Cre02.g143150.t1.3	62.8891	15.0249	110.753	7.37134	2.88193	2.03432e-10	1.71263e-08		>XP_001694979 predicted protein [Chlamydomonas reinhardtii].
g1864.t1	767.141	271.051	1263.23	4.6605	2.22048	2.04275e-10	1.71263e-08	S-adenosyl-L-methionine-dependent methyltransferases superfamily protein	>XP_001701231 methyltransferase [Chlamydomonas reinhardtii].
g10244.t1	51.5321	9.69553	93.3688	9.63008	3.26755	2.10416e-10	1.75473e-08
g4912.t1	93.0755	24.2024	161.949	6.69144	2.74232	2.40967e-10	1.99887e-08
g9971.t1	723.48	242.675	1204.28	4.96254	2.31108	2.69437e-10	2.22328e-08	RING/FYVE/PHD zinc finger superfamily protein	>XP_001697580 predicted protein [Chlamydomonas reinhardtii].
Cre12.g546600.t1.3	159.96	44.5522	275.367	6.18077	2.62779	3.05946e-10	2.49824e-08		>XP_001693965 Fe-assimilating protein 2 [Chlamydomonas reinhardtii].
Cre16.g649650.t1.1	565.123	54.6018	1075.64	19.6998	4.30011	4.48443e-10	3.62406e-08	Adenine nucleotide alpha hydrolases-like superfamily protein	>XP_001698173 hypothetical protein CHLREDRAFT_105992 [Chlamydomonas reinhardtii].
Cre12.g490450.t1.1	645.933	173.346	1118.52	6.45254	2.68987	5.0829e-10	4.08665e-08		>XP_001690938 predicted protein [Chlamydomonas reinhardtii].
Cre12.g555250.t1.2	3212.87	1152.09	5273.66	4.57747	2.19455	5.32347e-10	4.21522e-08	LYR family of Fe/S cluster biogenesis protein	>XP_001694042 NADH:ubiquinone oxidoreductase B14 subunit [Chlamydomonas reinhardtii].	H+ or Na+-translocating NADH dehydrogenase (NDH) family.	3.D.1.6.4
Cre16.g649550.t1.3	74.7032	18.3775	131.029	7.12984	2.83387	5.71444e-10	4.50206e-08		>XP_002952191 hypothetical protein VOLCADRAFT_105408 [Volvox carteri f. nagariensis].
Cre07.g335900.t1.2	125.68	23.2497	228.11	9.81131	3.29445	6.61569e-10	5.18604e-08	carboxypeptidase D, putative	>XP_001700144 predicted protein [Chlamydomonas reinhardtii].
Cre09.g394650.t1.2	1417.8	247.379	2588.23	10.4626	3.38717	6.92491e-10	5.40143e-08	BolA-like family protein	>DAA64393 TPA_exp: morphogenic-related protein [Chlamydomonas reinhardtii].
Cre17.g723750.t1.3	4154.56	1526.36	6782.76	4.44375	2.15178	7.44931e-10	5.7817e-08		>XP_001697226 hypothetical protein CHLREDRAFT_192467 [Chlamydomonas reinhardtii].
g4363.t1	6979.8	906.015	13053.6	14.4077	3.84877	8.08152e-10	6.24148e-08	eukaryotic initiation factor 4A-III	>XP_001699375 eukaryotic initiation factor [Chlamydomonas reinhardtii].	nuclear mRNA exporter (mRNA-E) family.	3.A.18.1.1
Cre06.g291100.t1.2	713.607	100.861	1326.35	13.1503	3.71702	8.29892e-10	6.37796e-08
Cre07.g351700.t1.2	1301.91	213.176	2390.65	11.2144	3.48729	9.1369e-10	6.98773e-08		>XP_002950262 hypothetical protein VOLCADRAFT_104644 [Volvox carteri f. nagariensis].
Cre05.g241300.t1.2	3108.33	483.593	5733.08	11.8552	3.56744	9.41357e-10	7.16437e-08	small nuclear ribonucleoprotein F	>XP_001697697 small nuclear riboprotein F [Chlamydomonas reinhardtii].
Cre12.g561200.t1.1	434.521	107.311	761.732	7.09835	2.82748	9.75534e-10	7.38861e-08	SNARE-like superfamily protein	>XP_001703122 Zeta2-COP [Chlamydomonas reinhardtii].
Cre03.g160300.t1.3	4406.66	1054.35	7758.97	7.359	2.87951	1.03086e-09	7.77008e-08	Ribosome associated membrane protein RAMP4	>XP_001697495 predicted protein [Chlamydomonas reinhardtii].
g4642.t1	306.758	60.3928	553.124	9.15877	3.19515	1.34936e-09	1.00739e-07		>XP_001698685 flagellar associated protein, partial [Chlamydomonas reinhardtii].
Cre14.g617550.t1.2	160.256	47.2725	273.239	5.78008	2.53109	1.4689e-09	1.09144e-07	calmodulin 5	>XP_001689822 outer dynein arm-docking complex subunit 3 [Chlamydomonas reinhardtii].
g15091.t2	14.0628	0	28.1256	Inf	Inf	1.48688e-09	1.09443e-07	ubiquitin-specific protease 16	>XP_001692809 predicted protein [Chlamydomonas reinhardtii].
g11668.t1	282.006	38.7506	525.262	13.5549	3.76075	1.4809e-09	1.09443e-07	Peroxisomal membrane 22 kDa (Mpv17/PMP22) family protein	>XP_001699471 predicted protein [Chlamydomonas reinhardtii].
Cre01.g004157.t1.2	195.621	59.7341	331.507	5.54971	2.47241	1.51902e-09	1.11286e-07		>XP_001702141 hypothetical protein CHLREDRAFT_194630, partial [Chlamydomonas reinhardtii].
g13061.t1	119.725	34.5303	204.92	5.93451	2.56913	1.66821e-09	1.21084e-07	glutamine synthetase 1;4	>XP_001693042 glutamine synthetase [Chlamydomonas reinhardtii].
g2778.t1	86.526	22.1904	150.862	6.79851	2.76522	1.75415e-09	1.26735e-07		>XP_001700493 predicted protein [Chlamydomonas reinhardtii].
g1883.t2	118.674	20.4535	216.894	10.6043	3.40658	1.82415e-09	1.31189e-07		>XP_001701222 flagellar associated protein [Chlamydomonas reinhardtii].
Cre17.g732500.t1.3	52.7751	11.4519	94.0983	8.2168	3.03858	1.90049e-09	1.35436e-07		>XP_001701495 predicted protein [Chlamydomonas reinhardtii].
g2754.t1	565.9	197.959	933.842	4.71735	2.23798	2.1498e-09	1.51823e-07		>XP_001700506 flagellar associated protein [Chlamydomonas reinhardtii].
Cre10.g431000.t1.3	20.3713	1.95415	38.7885	19.8493	4.31102	2.26974e-09	1.59574e-07
Cre17.g699750.t1.3	408.669	154.901	662.437	4.27651	2.09643	2.64668e-09	1.83604e-07		>XP_001691779 predicted protein [Chlamydomonas reinhardtii].
Cre06.g305350.t1.3	55.1443	13.3301	96.9586	7.27365	2.86268	2.68547e-09	1.85475e-07		>XP_001691388 hypothetical protein CHLREDRAFT_144919 [Chlamydomonas reinhardtii].
Cre12.g509100.t1.2	315.781	99.8516	531.71	5.325	2.41278	2.98572e-09	2.04411e-07		>XP_001691035 hypothetical protein CHLREDRAFT_94217 [Chlamydomonas reinhardtii].
Cre07.g347900.t1.3	129.421	41.2604	217.581	5.27335	2.39872	3.05628e-09	2.08332e-07	Transducin/WD40 repeat-like superfamily protein	>XP_002951701 hypothetical protein VOLCADRAFT_92304 [Volvox carteri f. nagariensis].
g2927.t1	106.139	32.8987	179.379	5.45247	2.44691	3.07218e-09	2.08509e-07		>XP_001695623 hypothetical protein CHLREDRAFT_57990 [Chlamydomonas reinhardtii].
g7506.t1	30.1864	4.65117	55.7217	11.9802	3.58258	3.35946e-09	2.27024e-07	ACT-like protein tyrosine kinase family protein	>XP_001700889 hypothetical protein CHLREDRAFT_142864 [Chlamydomonas reinhardtii].
Cre01.g006750.t1.2	66.182	8.27449	124.09	14.9966	3.90657	3.79207e-09	2.52987e-07		>XP_001691170 hypothetical protein CHLREDRAFT_180868 [Chlamydomonas reinhardtii].
Cre02.g099550.t1.3	838.753	335.434	1342.07	4.00099	2.00036	3.86e-09	2.56429e-07	PAS domain-containing protein tyrosine kinase family protein	>XP_001699823 predicted protein [Chlamydomonas reinhardtii].
Cre17.g713260.t1.2	767.928	89.4674	1446.39	16.1667	4.01495	4.12847e-09	2.70821e-07		>XP_001700463 predicted protein [Chlamydomonas reinhardtii].
g9239.t1	128.778	36.0656	221.489	6.14129	2.61854	5.00041e-09	3.23952e-07	C2H2 and C2HC zinc fingers superfamily protein	>XP_001695215 predicted protein [Chlamydomonas reinhardtii].
Cre02.g077750.t1.2	5752.96	2332.39	9173.52	3.93309	1.97566	5.21113e-09	3.34837e-07		>XP_001701654 flagellar associated protein [Chlamydomonas reinhardtii].
Cre03.g207800.t1.2	1276.29	517.389	2035.19	3.93357	1.97584	5.53229e-09	3.52582e-07	elicitor-activated gene 3-2	>XP_001693308 predicted protein [Chlamydomonas reinhardtii].
Cre16.g657200.t1.1	444.26	188.362	700.158	3.7171	1.89418	7.86518e-09	4.97219e-07	glyoxal oxidase-related protein	>XP_001697835 glyoxal or galactose oxidase [Chlamydomonas reinhardtii].
g8789.t1	16.9893	1.15039	32.8283	28.5368	4.83475	8.02206e-09	5.051e-07
Cre01.g035100.t1.2	937.641	368.698	1506.58	4.08623	2.03077	8.43953e-09	5.2926e-07		>XP_001689628 phosphoribosylaminoimidazole carboxylase, partial [Chlamydomonas reinhardtii].
Cre02.g094500.t1.2	648.652	94.3598	1202.94	12.7485	3.67225	9.02958e-09	5.57346e-07		>XP_001702000 predicted protein [Chlamydomonas reinhardtii].
Cre12.g485418.t1.3	110.352	38.1377	182.566	4.78702	2.25913	9.01053e-09	5.57346e-07		>XP_001703180 hypothetical protein CHLREDRAFT_154602, partial [Chlamydomonas reinhardtii].
Cre16.g681400.t1.3	72.3328	22.1633	122.502	5.52726	2.46656	9.25448e-09	5.68987e-07		>XP_001691890 hypothetical protein CHLREDRAFT_189258 [Chlamydomonas reinhardtii].
g4026.t1	43.5722	8.49552	78.6488	9.25768	3.21065	1.02271e-08	6.26034e-07		>XP_001691455 predicted protein, partial [Chlamydomonas reinhardtii].
g14664.t1	47.4514	11.0557	83.8472	7.58408	2.92297	1.02622e-08	6.26034e-07		>XP_001701351 hypothetical protein CHLREDRAFT_179453 [Chlamydomonas reinhardtii].
g5388.t1	76.7884	7.85495	145.722	18.5516	4.21347	1.08006e-08	6.56326e-07
Cre01.g040700.t1.3	4179.23	749.175	7609.29	10.1569	3.34439	1.17616e-08	7.11961e-07
g16888.t1	347.856	59.7687	635.943	10.6401	3.41144	1.19746e-08	7.22067e-07		>XP_001691805 predicted protein, partial [Chlamydomonas reinhardtii].
Cre06.g248850.t1.3	183.401	70.2875	296.514	4.2186	2.07676	1.22924e-08	7.38393e-07	Protein kinase superfamily protein	>ADI46819 PRP4f [Volvox carteri f. nagariensis].
Cre02.g107650.t1.2	27.4505	4.81131	50.0896	10.4108	3.38001	1.23429e-08	7.38598e-07		>XP_001699733 hypothetical protein CHLREDRAFT_141778 [Chlamydomonas reinhardtii].
Cre01.g039200.t1.2	1347.14	233.474	2460.81	10.54	3.3978	1.24346e-08	7.41251e-07	RAB GTPase homolog G3A	>XP_001689669 flagellar ATPase, ras GTPase-like protein [Chlamydomonas reinhardtii].
Cre09.g413900.t1.2	357.354	80.6673	634.041	7.85995	2.97452	1.28743e-08	7.64559e-07		>XP_001696725 hypothetical protein CHLREDRAFT_158640 [Chlamydomonas reinhardtii].
Cre16.g689550.t1.3	143.501	47.0784	239.924	5.09626	2.34944	1.52554e-08	8.99149e-07	ACT-like protein tyrosine kinase family protein	>XP_001699252 hypothetical protein CHLREDRAFT_152403 [Chlamydomonas reinhardtii].
Cre03.g157850.t1.2	497.696	142.087	853.306	6.00551	2.58629	1.61412e-08	9.44259e-07
Cre01.g034550.t1.2	940.556	171.646	1709.47	9.95926	3.31604	1.63978e-08	9.55704e-07		>XP_002954006 hypothetical protein VOLCADRAFT_121237 [Volvox carteri f. nagariensis].
g5493.t1	780.176	138.049	1422.3	10.3029	3.36497	1.88508e-08	1.0946e-06
g6726.t1	174.402	64.3702	284.434	4.41873	2.14363	2.14558e-08	1.24127e-06	MYB-like 102	>XP_001695521 predicted protein [Chlamydomonas reinhardtii].
Cre17.g700650.t1.2	4564.52	507.005	8622.04	17.0058	4.08796	2.18326e-08	1.25842e-06		>XP_001691772 predicted protein, partial [Chlamydomonas reinhardtii].
Cre12.g527450.t1.2	635.795	119.365	1152.23	9.65299	3.27098	2.22081e-08	1.27538e-06	Calcium-binding EF hand family protein	>XP_001696874 hypothetical protein CHLREDRAFT_184902 [Chlamydomonas reinhardtii].
Cre12.g528300.t1.3	216.951	85.5251	348.376	4.07338	2.02623	2.28137e-08	1.30538e-06		>XP_001696865 hypothetical protein CHLREDRAFT_192574 [Chlamydomonas reinhardtii].
Cre10.g428850.t1.2	645.248	119.481	1171.02	9.80085	3.29291	2.40407e-08	1.37058e-06		>XP_001702703 predicted protein [Chlamydomonas reinhardtii].
g15714.t1	92.605	27.5348	157.675	5.7264	2.51763	2.47116e-08	1.40373e-06	ethylene-responsive element binding protein
Cre03.g207700.t1.1	903.513	347.555	1459.47	4.19925	2.07013	2.90558e-08	1.62692e-06	farnesyl diphosphate synthase 2	>XP_001693168 farnesyl diphosphate synthase [Chlamydomonas reinhardtii].
Cre01.g048650.t1.2	1014.5	434.786	1594.21	3.66665	1.87446	3.08975e-08	1.72388e-06	calcium-dependent protein kinase 17	>XP_001689749 predicted protein [Chlamydomonas reinhardtii].
g4477.t1	13.8131	0.506765	27.1195	53.5149	5.74187	3.11519e-08	1.72579e-06		>XP_001699414 predicted protein [Chlamydomonas reinhardtii].
Cre05.g233500.t1.2	21.8885	3.0173	40.7598	13.5087	3.75581	3.88294e-08	2.14355e-06	squamosa promoter binding protein-like 9
Cre03.g178350.t1.1	342.374	117.891	566.856	4.80828	2.26552	3.91414e-08	2.15319e-06	calmodulin 4	>XP_001703260 flagellar associated protein, calmodulin-like protein, partial [Chlamydomonas reinhardtii].
Cre17.g698903.t1.2	159.891	57.9537	261.828	4.51788	2.17565	4.15812e-08	2.27147e-06		>XP_001691788 predicted protein [Chlamydomonas reinhardtii].
g9719.t1	370.841	70.062	671.619	9.58607	3.26094	4.22964e-08	2.30251e-06		>XP_001694739 predicted protein [Chlamydomonas reinhardtii].
g10044.t1	26.763	3.95792	49.568	12.5238	3.6466	4.67725e-08	2.53737e-06
g12785.t1	106.711	19.4143	194.008	9.99304	3.32092	4.9395e-08	2.66122e-06
Cre11.g476000.t1.2	601.805	185.875	1017.74	5.47538	2.45296	4.99744e-08	2.68321e-06
Cre12.g509800.t1.2	224.9	93.9733	355.826	3.78646	1.92085	5.25421e-08	2.81145e-06		>XP_001690861 flagellar associated protein [Chlamydomonas reinhardtii].
g2992.t1	414.545	59.331	769.76	12.974	3.69755	5.29593e-08	2.82414e-06		>XP_001695702 hypothetical protein CHLREDRAFT_191972 [Chlamydomonas reinhardtii].
g9661.t1	160.074	63.6619	256.487	4.02889	2.01038	5.44852e-08	2.89566e-06	ACT-like protein tyrosine kinase family protein	>XP_001694942 predicted protein [Chlamydomonas reinhardtii].
Cre17.g742300.t1.3	4096.09	713.851	7478.34	10.476	3.38902	6.09854e-08	3.23016e-06	glutathione S-transferase PHI 10	>XP_001701127 flagellar associated protein [Chlamydomonas reinhardtii].
g8121.t1	561.906	208.421	915.392	4.39205	2.13489	6.3183e-08	3.33529e-06
g14077.t1	743.43	329.153	1157.71	3.51724	1.81444	6.40068e-08	3.36744e-06
g17776.t1	38.4408	9.6459	67.2356	6.97038	2.80124	6.49155e-08	3.40383e-06		>XP_001691486 hypothetical protein CHLREDRAFT_180873 [Chlamydomonas reinhardtii].
g6413.t1	291	34.9723	547.027	15.6417	3.96733	6.94889e-08	3.63149e-06		>XP_001698046 hypothetical protein CHLREDRAFT_151264, partial [Chlamydomonas reinhardtii].
Cre16.g657250.t1.2	250.579	66.3206	434.838	6.5566	2.71295	7.88523e-08	4.10713e-06	glyoxal oxidase-related protein	>XP_001697835 glyoxal or galactose oxidase [Chlamydomonas reinhardtii].
Cre17.g735700.t1.2	280.818	118.561	443.075	3.73711	1.90192	8.38088e-08	4.35084e-06		>XP_001699602 predicted protein [Chlamydomonas reinhardtii].
Cre02.g111000.t1.2	780.01	182.835	1377.18	7.5324	2.91311	8.49551e-08	4.3958e-06	Nucleotide-diphospho-sugar transferase family protein	>XP_001699928 predicted protein [Chlamydomonas reinhardtii].
Cre01.g032650.t1.2	15.5603	0.853388	30.2671	35.467	5.14841	9.00293e-08	4.6278e-06	Aldolase superfamily protein	>XP_001690070 transaldolase [Chlamydomonas reinhardtii].
g9126.t1	2331.22	603.186	4059.26	6.72969	2.75054	9.29973e-08	4.76475e-06		>XP_001695268 predicted protein, partial [Chlamydomonas reinhardtii].
g5368.t1	1344.83	235.772	2453.9	10.4079	3.37961	1.01011e-07	5.14049e-06	PHF5-like protein	>XP_001700648 predicted protein [Chlamydomonas reinhardtii].
Cre16.g678550.t1.3	116.882	45.2731	188.491	4.16342	2.05777	1.01315e-07	5.14049e-06		>XP_001695970 hypothetical protein CHLREDRAFT_191581 [Chlamydomonas reinhardtii].
g14528.t1	30.5464	6.06095	55.0319	9.07976	3.18265	1.02109e-07	5.16409e-06
g18200.t1	14.6583	1.15039	28.1663	24.4842	4.61378	1.06001e-07	5.34367e-06		>XP_001700679 predicted protein [Chlamydomonas reinhardtii].
Cre12.g495550.t1.2	92.7657	13.9504	171.581	12.2993	3.62051	1.21531e-07	6.02965e-06		>XP_001700549 predicted protein [Chlamydomonas reinhardtii].
g16042.t1	14.554	1.31053	27.7976	21.211	4.40674	1.23529e-07	6.10945e-06	ADP-ribosylation factor A1B	>XP_001701479 ARF-like small GTPase [Chlamydomonas reinhardtii].
g8218.t1	372.388	119.758	625.018	5.21902	2.38378	1.24766e-07	6.15119e-06
Cre16.g687400.t1.3	553.194	233.959	872.429	3.72898	1.89878	1.32944e-07	6.53382e-06	Protein kinase superfamily protein	>XP_002950395 hypothetical protein VOLCADRAFT_60205 [Volvox carteri f. nagariensis].
g9784.t1	326.979	144.379	509.579	3.52946	1.81945	1.39748e-07	6.84678e-06	Carbohydrate-binding-like fold	>XP_002951632 hypothetical protein VOLCADRAFT_92161 [Volvox carteri f. nagariensis].
Cre10.g437500.t1.2	2439.28	520.054	4358.51	8.38087	3.0671	1.47055e-07	7.18232e-06		>XP_001690575 translocase of mitochondrial outer membrane [Chlamydomonas reinhardtii].
Cre10.g466900.t1.2	259.731	109.582	409.879	3.74037	1.90318	1.47891e-07	7.20072e-06		>XP_001698647 hypothetical protein CHLREDRAFT_187825 [Chlamydomonas reinhardtii].
g1422.t1	508.06	39.361	976.759	24.8154	4.63316	1.48358e-07	7.2011e-06
Cre07.g320350.t1.2	667.366	293.656	1041.08	3.54523	1.82588	1.51385e-07	7.32538e-06	DNAJ heat shock N-terminal domain-containing protein	>XP_001700843 chloroplast DnaJ-like protein [Chlamydomonas reinhardtii].
Cre06.g298100.t1.2	10357.6	1909.69	18805.5	9.84739	3.29974	1.52517e-07	7.35742e-06	Translation initiation factor SUI1 family protein	>XP_001691459 translation initiation protein [Chlamydomonas reinhardtii].
g15946.t1	56197.2	9634.22	102760	10.6662	3.41497	1.59872e-07	7.66506e-06	Ribosomal protein S10p/S20e family protein	>XP_001697930 ribosomal protein S20, component of cytosolic 80S ribosome and 40S small subunit [Chlamydomonas reinhardtii].
g2819.t1	12.1916	0.506765	23.8764	47.1153	5.55812	1.6236e-07	7.73702e-06
Cre06.g252743.t1.2	12.4207	0.506765	24.3347	48.0197	5.58555	1.63568e-07	7.77095e-06
g2828.t1	93.3326	8.79252	177.873	20.23	4.33842	1.65931e-07	7.85942e-06		>XP_001702250 hypothetical protein CHLREDRAFT_154229 [Chlamydomonas reinhardtii].
Cre02.g102400.t1.2	169.651	70.5612	268.74	3.80861	1.92926	1.67108e-07	7.89134e-06	DNA-directed RNA polymerase, subunit M, archaeal	>XP_001699794 predicted protein [Chlamydomonas reinhardtii].
g11501.t1	12.9446	0	25.8893	Inf	Inf	1.74047e-07	8.1943e-06		>XP_001701406 predicted protein [Chlamydomonas reinhardtii].
Cre06.g290850.t1.2	286.839	41.9972	531.681	12.6599	3.6622	1.82439e-07	8.56372e-06		>XP_001695398 predicted protein [Chlamydomonas reinhardtii].
g6719.t1	964.266	168.748	1759.78	10.4285	3.38246	1.8643e-07	8.72491e-06	Ribosomal protein L32e	>XP_001695517 ribosomal protein L32, component of cytosolic 80S ribosome and 60S large subunit [Chlamydomonas reinhardtii].
Cre03.g197750.t1.2	361.012	111.901	610.124	5.45238	2.44689	2.02198e-07	9.43469e-06	glutathione peroxidase 1	>XP_001693150 glutathione peroxidase [Chlamydomonas reinhardtii].
g1283.t1	1517.7	345.556	2689.85	7.78413	2.96054	2.08562e-07	9.70279e-06		>XP_001700244 cytochrome c oxidase assembly protein [Chlamydomonas reinhardtii].
g1756.t1	15.0842	1.01353	29.1549	28.7657	4.84628	2.21352e-07	1.02371e-05
g7190.t2	10.2858	0	20.5717	Inf	Inf	2.23839e-07	1.03216e-05	Zinc-binding ribosomal protein family protein	>XP_001691337 ribosomal protein L36a, component of cytosolic 80S ribosome and 60S large subunit [Chlamydomonas reinhardtii].
Cre14.g615750.t1.1	70.7966	24.5866	117.007	4.75896	2.25065	2.55699e-07	1.17561e-05		>XP_001699008 calmodulin-like protein [Chlamydomonas reinhardtii].
Cre12.g527750.t1.2	1251.8	248.334	2255.26	9.08159	3.18295	2.69668e-07	1.23621e-05		>XP_001696871 flagellar outer dynein arm light chain 2 [Chlamydomonas reinhardtii].
g18329.t1	79.2694	17.1542	141.385	8.24196	3.04299	2.71675e-07	1.24179e-05		>BAA25763 reverse transcriptase [Chlorella vulgaris].
g8412.t1	40.1753	9.49703	70.8536	7.4606	2.89929	2.78889e-07	1.26737e-05		>XP_001702299 hypothetical protein CHLREDRAFT_185869 [Chlamydomonas reinhardtii].
g8513.t1	76.3467	26.6362	126.057	4.73255	2.24262	2.84207e-07	1.28409e-05		>XP_001696025 hypothetical protein CHLREDRAFT_192211 [Chlamydomonas reinhardtii].
Cre02.g087850.t1.3	209.728	95.1237	324.333	3.40959	1.7696	2.83504e-07	1.28409e-05	Protein kinase family protein	>XP_001701950 predicted protein [Chlamydomonas reinhardtii].
Cre07.g313000.t1.3	229.559	92.3944	366.724	3.96912	1.98882	2.91308e-07	1.31239e-05		>XP_001700958 hypothetical protein CHLREDRAFT_187432 [Chlamydomonas reinhardtii].
Cre12.g546400.t1.2	189.306	75.1906	303.422	4.03538	2.0127	2.92313e-07	1.31315e-05		>XP_001694098 roadblock/lc7 family protein [Chlamydomonas reinhardtii].
Cre16.g662750.t1.2	320.948	138.761	503.135	3.6259	1.85834	2.99248e-07	1.34046e-05		>XP_001697881 hypothetical protein CHLREDRAFT_193106 [Chlamydomonas reinhardtii].
Cre16.g689600.t1.2	934.216	117.897	1750.53	14.848	3.8922	3.07728e-07	1.37452e-05		>BAM95826 flagellar associated protein 73 [Chlamydomonas reinhardtii].
Cre08.g374450.t1.3	40.4138	11.0091	69.8185	6.34189	2.66491	3.31763e-07	1.47766e-05		>XP_001694395 predicted protein, partial [Chlamydomonas reinhardtii].
Cre09.g415900.t1.2	331.792	56.0137	607.57	10.8468	3.4392	3.42623e-07	1.51741e-05	Nucleotide-sugar transporter family protein	>XP_001696828 hypothetical protein CHLREDRAFT_192150 [Chlamydomonas reinhardtii].
Cre17.g705700.t1.2	323.794	137.371	510.217	3.71414	1.89303	3.44522e-07	1.52153e-05	delta 1-pyrroline-5-carboxylate synthase 2	>XP_001691563 glutamate 5-kinase [Chlamydomonas reinhardtii].
Cre16.g661200.t1.2	198.515	75.9493	321.081	4.22758	2.07983	3.48154e-07	1.53325e-05		>XP_001697866 hypothetical protein CHLREDRAFT_177005 [Chlamydomonas reinhardtii].
Cre01.g029900.t1.2	82.1169	31.6956	132.538	4.18159	2.06405	3.68505e-07	1.61832e-05	ABC-2 type transporter family protein	>XP_001689579 predicted protein [Chlamydomonas reinhardtii].	ATP-binding cassette (ABC) superfamily.	3.A.1.204.2
Cre12.g516100.t1.2	1766.05	520.775	3011.32	5.78237	2.53166	3.71485e-07	1.62685e-05	ORMDL family protein	>XP_001703235 hypothetical protein CHLREDRAFT_185995 [Chlamydomonas reinhardtii].
Cre12.g518700.t1.3	149.714	6.70151	292.727	43.6807	5.44892	3.84859e-07	1.67606e-05		>XP_001696949 hypothetical protein CHLREDRAFT_192689, partial [Chlamydomonas reinhardtii].
Cre13.g591550.t1.3	20.7752	4.11806	37.4323	9.08978	3.18425	3.97649e-07	1.72696e-05		>XP_001692951 predicted protein [Chlamydomonas reinhardtii].
Cre12.g543000.t1.3	13.2097	0.693246	25.7262	37.1098	5.21373	4.09035e-07	1.76177e-05		>XP_002955738 hypothetical protein VOLCADRAFT_119180 [Volvox carteri f. nagariensis].
Cre10.g451150.t1.3	161.656	70.1567	253.156	3.60843	1.85137	4.1649e-07	1.78897e-05		>XP_001698332 predicted protein, partial [Chlamydomonas reinhardtii].
Cre17.g723800.t1.2	2923.45	1005.42	4841.49	4.81541	2.26766	4.1786e-07	1.78995e-05		>XP_002945718 hypothetical protein VOLCADRAFT_102698 [Volvox carteri f. nagariensis].
Cre03.g208000.t1.1	1554.89	441.614	2668.16	6.04185	2.59499	4.59323e-07	1.95156e-05	Nucleic acid-binding, OB-fold-like protein	>XP_001693165 predicted protein [Chlamydomonas reinhardtii].
Cre12.g516841.t1.2	2185.72	226.385	4145.06	18.3097	4.19454	4.75798e-07	2.01066e-05
g9163.t1	209.084	81.5598	336.608	4.12713	2.04514	4.85309e-07	2.04534e-05		>XP_001695137 predicted protein [Chlamydomonas reinhardtii].
Cre12.g554350.t1.2	3307.18	318.365	6296	19.7761	4.30568	4.92055e-07	2.06283e-05		>XP_001694032 predicted protein [Chlamydomonas reinhardtii].
Cre03.g157350.t1.3	274.658	124.214	425.102	3.42233	1.77498	4.92089e-07	2.06283e-05		>XP_001697446 predicted protein [Chlamydomonas reinhardtii].
Cre10.g431250.t1.3	21.1808	3.87069	38.4909	9.94419	3.31385	4.95343e-07	2.07093e-05		>XP_001702500 predicted protein, partial [Chlamydomonas reinhardtii].
Cre07.g343789.t1.2	25.7269	4.61356	46.8402	10.1527	3.34379	5.20382e-07	2.16407e-05		>XP_002951743 hypothetical protein VOLCADRAFT_92393, partial [Volvox carteri f. nagariensis].
Cre12.g486650.t1.2	76.029	29.9888	122.069	4.07049	2.0252	5.31771e-07	2.20558e-05		>XP_002948328 hypothetical protein VOLCADRAFT_116770, partial [Volvox carteri f. nagariensis].
Cre09.g389100.t1.2	493.282	142.634	843.93	5.91673	2.5648	5.9516e-07	2.45551e-05	Got1/Sft2-like vescicle transport protein family	>XP_001694437 predicted protein [Chlamydomonas reinhardtii].
g18260.t1	444.395	168.259	720.53	4.28226	2.09837	5.94461e-07	2.45551e-05	Pheophorbide a oxygenase family protein with Rieske [2Fe-2S] domain	>XP_002947794 hypothetical protein VOLCADRAFT_88044 [Volvox carteri f. nagariensis].
g12582.t1	7789.37	1536.6	14042.1	9.13846	3.19195	6.1532e-07	2.53202e-05
g15312.t2	11.1594	0.346623	21.9722	63.3895	5.98617	6.27711e-07	2.57625e-05		>XP_001696156 hypothetical protein CHLREDRAFT_175687, partial [Chlamydomonas reinhardtii].
Cre17.g696400.t1.1	1207.21	214.099	2200.32	10.2771	3.36136	6.35604e-07	2.60183e-05	Ribosomal protein L12/ ATP-dependent Clp protease adaptor protein ClpS family protein	>XP_001691804 clp protease adaptor protein [Chlamydomonas reinhardtii].
g18179.t1	9.20589	0	18.4118	Inf	Inf	6.74116e-07	2.74514e-05		>XP_001691172 hypothetical protein CHLREDRAFT_180867 [Chlamydomonas reinhardtii].
Cre07.g321000.t1.3	237.739	111.27	364.208	3.27318	1.71069	6.9294e-07	2.80721e-05		>XP_001701036 guanylate cyclase, partial [Chlamydomonas reinhardtii].
g9673.t1	522.104	232.99	811.219	3.48178	1.79982	7.29758e-07	2.94117e-05	Mono-/di-acylglycerol lipase, N-terminal;Lipase, class 3	>XP_001694945 flagellar associated protein [Chlamydomonas reinhardtii].
g4373.t1	13.8649	1.03987	26.6899	25.6666	4.68182	7.71685e-07	3.09424e-05		>XP_001699427 hypothetical protein CHLREDRAFT_177776 [Chlamydomonas reinhardtii].
Cre06.g310200.t1.2	191.651	82.9839	300.319	3.619	1.85559	7.8345e-07	3.1334e-05	tetratricopeptide repeat (TPR)-containing protein	>XP_001691342 hypothetical protein CHLREDRAFT_188807 [Chlamydomonas reinhardtii].
g7048.t1	207.593	53.6537	361.533	6.73826	2.75238	7.97639e-07	3.18203e-05		>XP_001691397 hypothetical protein CHLREDRAFT_188874 [Chlamydomonas reinhardtii].
g15366.t1	149.439	42.0468	256.831	6.10822	2.61075	8.47282e-07	3.35447e-05
g11577.t1	35.1241	9.26168	60.9866	6.58483	2.71915	8.51025e-07	3.36013e-05	methyltransferases	>EKX33659 hypothetical protein GUITHDRAFT_81225 [Guillardia theta CCMP2712].
Cre08.g373250.t1.2	1860.2	640.267	3080.13	4.81069	2.26624	8.90216e-07	3.49795e-05	proteasome subunit PAB1	>XP_001701305 20S proteasome alpha subunit B [Chlamydomonas reinhardtii].
g17943.t2	1082.72	93.24	2072.2	22.2244	4.47407	9.18809e-07	3.59229e-05	PAS domain-containing protein tyrosine kinase family protein	>XP_001698130 hypothetical protein CHLREDRAFT_177059 [Chlamydomonas reinhardtii].
Cre03.g184450.t1.1	512.913	243.693	782.134	3.20951	1.68235	9.33351e-07	3.64007e-05	AGC (cAMP-dependent, cGMP-dependent and protein kinase C) kinase family protein	>XP_001691824 predicted protein, partial [Chlamydomonas reinhardtii].
g5718.t1	62.7154	10.5753	114.855	10.8608	3.44106	9.67019e-07	3.7527e-05
Cre02.g074450.t1.3	2283.51	1127.35	3439.68	3.05112	1.60934	1.02327e-06	3.9612e-05	KH domain-containing protein	>XP_001701829 RNA binding protein [Chlamydomonas reinhardtii].
Cre15.g641450.t1.3	23.0908	5.63836	40.5432	7.19061	2.84611	1.04871e-06	4.03972e-05
g156.t1	24.5681	4.91056	44.2256	9.00622	3.17092	1.06747e-06	4.0919e-05
g9684.t1	1460.61	700.112	2221.1	3.17249	1.66562	1.07255e-06	4.10132e-05	protein phosphatase 2A-4	>XP_002948431 hypothetical protein VOLCADRAFT_80191 [Volvox carteri f. nagariensis].
Cre05.g237700.t1.2	254.989	82.438	427.541	5.18621	2.37468	1.14421e-06	4.3647e-05	nucleolar RNA-binding Nop10p family protein	>XP_001697730 nucleolar protein, structural component of H/ACA snoRNPs [Chlamydomonas reinhardtii].
Cre17.g733300.t1.3	76.419	30.9151	121.923	3.94379	1.97958	1.1883e-06	4.51093e-05	NPK1-related protein kinase 2	>XP_001699564 hypothetical protein CHLREDRAFT_121660, partial [Chlamydomonas reinhardtii].
Cre06.g251000.t1.2	6389.15	1034.8	11743.5	11.3486	3.50444	1.19846e-06	4.53853e-05		>XP_001696657 hypothetical protein CHLREDRAFT_196282 [Chlamydomonas reinhardtii].
g17835.t1	78.4299	21.1618	135.698	6.41241	2.68087	1.3009e-06	4.90278e-05
g9799.t1	116.447	27.5625	205.332	7.44969	2.89718	1.34072e-06	4.99536e-05
g14811.t1	75.4932	25.1806	125.806	4.99615	2.32082	1.3414e-06	4.99536e-05
g2460.t1	2381.6	1145.1	3618.1	3.15964	1.65976	1.34911e-06	5.01216e-05		>XP_001702421 predicted protein [Chlamydomonas reinhardtii].
Cre01.g045200.t1.1	13.7884	1.65715	25.9197	15.6411	3.96727	1.35507e-06	5.02242e-05	allene oxide cyclase 2	>XP_001689723 predicted protein [Chlamydomonas reinhardtii].
g9123.t1	705.881	300.731	1111.03	3.69443	1.88535	1.35996e-06	5.02865e-05		>XP_001695172 predicted protein [Chlamydomonas reinhardtii].
Cre03.g177450.t1.3	170.337	78.6929	261.981	3.32916	1.73516	1.37803e-06	5.07815e-05		>XP_001703428 hypothetical protein CHLREDRAFT_188151 [Chlamydomonas reinhardtii].
Cre09.g417350.t1.3	1525.75	317.666	2733.82	8.60596	3.10534	1.3981e-06	5.12135e-05		>XP_001696765 hypothetical protein CHLREDRAFT_119438 [Chlamydomonas reinhardtii].
Cre02.g103784.t1.2	106.02	42.5559	169.483	3.98261	1.99371	1.39713e-06	5.12135e-05		>XP_001699992 hypothetical protein CHLREDRAFT_186882 [Chlamydomonas reinhardtii].
Cre04.g218800.t1.3	170.807	75.5861	266.029	3.51955	1.81539	1.41529e-06	5.17225e-05		>XP_001692257 hypothetical protein CHLREDRAFT_145701, partial [Chlamydomonas reinhardtii].
Cre02.g117700.t1.1	293.25	140.706	445.795	3.16827	1.6637	1.42371e-06	5.19092e-05		>XP_001702456 predicted protein [Chlamydomonas reinhardtii].
Cre10.g446450.t1.2	160.798	70.9876	250.608	3.53031	1.81979	1.4741e-06	5.34977e-05	response regulator 12	>XP_002956168 hypothetical protein VOLCADRAFT_97137 [Volvox carteri f. nagariensis].
Cre09.g405400.t1.2	2144.81	414.61	3875.01	9.34616	3.22437	1.50547e-06	5.45099e-05	PREFOLDIN 1	>XP_001697667 prefoldin-related KE2-like protein [Chlamydomonas reinhardtii].
g153.t1	8.49458	0	16.9892	Inf	Inf	1.52265e-06	5.50049e-05		>CAN61262 hypothetical protein VITISV_005781 [Vitis vinifera].
Cre01.g049950.t1.1	2358.82	1180.13	3537.51	2.99755	1.58378	1.52889e-06	5.51033e-05		>BAF96750 subtilase-like serine protease [Chlamydomonas reinhardtii].
Cre10.g427800.t1.2	139.003	61.9904	216.016	3.48467	1.80102	1.56555e-06	5.62953e-05		>XP_001702715 predicted protein [Chlamydomonas reinhardtii].
Cre12.g538950.t1.2	849.071	326.03	1372.11	4.20855	2.07332	1.68166e-06	5.99205e-05	Ubiquitin domain-containing protein	>XP_001692964 predicted protein, partial [Chlamydomonas reinhardtii].
Cre16.g676450.t1.2	999.507	358.554	1640.46	4.57521	2.19384	1.73724e-06	6.17606e-05		>XP_001695950 hypothetical protein CHLREDRAFT_184411 [Chlamydomonas reinhardtii].
g6279.t1	87.4423	35.322	139.563	3.95115	1.98227	1.76027e-06	6.2438e-05
g5352.t1	26.5181	6.06095	46.9752	7.75047	2.95428	1.80792e-06	6.38003e-05	fructose-bisphosphate aldolase 2	>XP_001700659 fructose-1,6-bisphosphate aldolase [Chlamydomonas reinhardtii].
Cre07.g356400.t1.2	4086.93	988.923	7184.94	7.26542	2.86105	1.85817e-06	6.53193e-05		>XP_001702063 centriole proteome protein [Chlamydomonas reinhardtii].
g11454.t1	314.096	84.3591	543.832	6.44663	2.68855	1.86988e-06	6.55839e-05		>XP_001701398 predicted protein [Chlamydomonas reinhardtii].
Cre17.g705250.t1.3	77.284	31.7798	122.788	3.86372	1.94999	1.90355e-06	6.64675e-05		>XP_001691724 hypothetical protein CHLREDRAFT_189058 [Chlamydomonas reinhardtii].
Cre06.g257150.t1.2	8511.19	3139.57	13882.8	4.42189	2.14466	2.05575e-06	7.16224e-05	Zinc-binding ribosomal protein family protein	>XP_001696616 ribosomal protein L37a, component of cytosolic 80S ribosome and 60S large subunit [Chlamydomonas reinhardtii].
g5395.t1	139.374	7.98875	270.759	33.8925	5.08289	2.11362e-06	7.33387e-05
Cre03.g158950.t1.1	865.002	275.19	1454.81	5.28658	2.40233	2.11437e-06	7.33387e-05	RNA-binding (RRM/RBD/RNP motifs) family protein	>XP_001697436 predicted protein [Chlamydomonas reinhardtii].
g6420.t1	13.0883	1.81729	24.3594	13.4042	3.74462	2.13537e-06	7.39037e-05
Cre06.g267400.t1.2	157.504	66.4288	248.578	3.74203	1.90382	2.17338e-06	7.50533e-05	Protein kinase superfamily protein with octicosapeptide/Phox/Bem1p domain	>XP_001696530 hypothetical protein CHLREDRAFT_142178, partial [Chlamydomonas reinhardtii].
g10360.t1	65596.1	7520.8	123671	16.4439	4.03948	2.37283e-06	8.15818e-05		>XP_001702634 predicted protein [Chlamydomonas reinhardtii].
g9598.t1	25473	4503.1	46442.9	10.3135	3.36647	2.41538e-06	8.28442e-05	pyrophosphorylase 4	>XP_001694912 soluble inorganic pyrophosphatase [Chlamydomonas reinhardtii].
Cre02.g103750.t1.2	25.2355	7.08574	43.3853	6.12291	2.61422	2.42012e-06	8.28442e-05
Cre12.g509000.t1.3	280.545	26.5407	534.549	20.1407	4.33204	2.50252e-06	8.54781e-05	MAP kinase 4	>XP_001690852 mitogen-activated protein kinase 3 [Chlamydomonas reinhardtii].
g15842.t1	43.6665	16.385	70.9479	4.33005	2.11438	2.51365e-06	8.56717e-05		>XP_001694231 predicted protein [Chlamydomonas reinhardtii].
Cre05.g248500.t1.2	2159.98	434.875	3885.08	8.93378	3.15927	2.5288e-06	8.60011e-05	thioredoxin 2	>XP_001700771 thioredoxin o [Chlamydomonas reinhardtii].
g6869.t1	17.2814	1.54663	33.0161	21.3471	4.41597	2.60317e-06	8.81481e-05		>XP_003096066 hypothetical protein CRE_05135 [Caenorhabditis remanei].
Cre05.g238100.t1.2	563.009	282.259	843.76	2.98931	1.57981	2.60932e-06	8.81659e-05	Protein kinase superfamily protein with octicosapeptide/Phox/Bem1p domain	>XP_001697786 hypothetical protein CHLREDRAFT_192752 [Chlamydomonas reinhardtii].
Cre10.g456250.t1.2	1770.91	367.373	3174.45	8.64094	3.11119	2.67629e-06	9.0234e-05	Thioredoxin superfamily protein	>XP_001698369 thioredoxin-like protein [Chlamydomonas reinhardtii].
g12889.t1	8.18051	0	16.361	Inf	Inf	2.73536e-06	9.20277e-05		>XP_002947964 hypothetical protein VOLCADRAFT_103748 [Volvox carteri f. nagariensis].
Cre01.g026600.t1.2	2490.75	961.753	4019.76	4.17961	2.06337	2.85748e-06	9.59305e-05	ubiquitin-conjugating enzyme 36	>XP_001690010 predicted protein [Chlamydomonas reinhardtii].
Cre09.g391150.t1.3	15.5321	2.67068	28.3935	10.6316	3.41028	2.94252e-06	9.83885e-05		>XP_001694569 predicted protein [Chlamydomonas reinhardtii].
Cre16.g678350.t1.2	60.4782	23.8061	97.1503	4.0809	2.02889	2.98911e-06	9.92924e-05	calmodulin-like domain protein kinase 9	>XP_001695969 hypothetical protein CHLREDRAFT_191579 [Chlamydomonas reinhardtii].
Cre09.g389700.t1.2	195.296	96.723	293.868	3.03825	1.60324	2.98929e-06	9.92924e-05		>XP_001694558 predicted protein [Chlamydomonas reinhardtii].
Cre01.g051450.t1.3	19.5066	0.803762	38.2094	47.5382	5.57101	3.03229e-06	0.000100296		>XP_001690251 predicted protein [Chlamydomonas reinhardtii].
Cre02.g092800.t1.2	129.732	60.4146	199.049	3.29472	1.72015	3.07123e-06	0.00010137		>XP_001701987 flagellar associated protein [Chlamydomonas reinhardtii].
Cre13.g585200.t1.2	44.3746	15.9309	72.8183	4.57088	2.19247	3.08158e-06	0.000101498		>XP_001693849 predicted protein, partial [Chlamydomonas reinhardtii].
g12540.t2	49.0851	16.7234	81.4467	4.87022	2.28399	3.14589e-06	0.000103399
g11691.t1	136.323	60.5056	212.141	3.50614	1.80988	3.16478e-06	0.000103766		>XP_001699520 predicted protein [Chlamydomonas reinhardtii].
Cre16.g677750.t1.2	891.8	445.056	1338.54	3.00758	1.5886	3.17031e-06	0.000103766		>XP_001695962 hypothetical protein CHLREDRAFT_149209 [Chlamydomonas reinhardtii].
Cre06.g298400.t1.2	371.19	38.6371	703.743	18.2142	4.18699	3.17733e-06	0.000103779		>XP_001691455 predicted protein, partial [Chlamydomonas reinhardtii].
Cre10.g420750.t1.2	56519.2	11544.6	101494	8.79147	3.1361	3.22279e-06	0.000105046	Ribosomal protein L7Ae/L30e/S12e/Gadd45 family protein	>XP_001702608 ribosomal protein L30, component of cytosolic 80S ribosome and 60S large subunit [Chlamydomonas reinhardtii].
g11501.t2	35.4923	4.67445	66.3101	14.1856	3.82636	3.29131e-06	0.000106988		>XP_001701406 predicted protein [Chlamydomonas reinhardtii].
Cre12.g535650.t1.2	52.0667	19.6151	84.5182	4.30882	2.10729	3.29602e-06	0.000106988		>XP_001692987 predicted protein [Chlamydomonas reinhardtii].
Cre12.g525350.t1.3	27.7738	8.28575	47.2619	5.70399	2.51197	3.34967e-06	0.000108281		>XP_001697004 hypothetical protein CHLREDRAFT_176182 [Chlamydomonas reinhardtii].
g2883.t1	396.691	176.393	616.99	3.49782	1.80646	3.36811e-06	0.000108559		>XP_001695641 hypothetical protein CHLREDRAFT_184633 [Chlamydomonas reinhardtii].
Cre06.g281850.t1.2	98.8897	44.7167	153.063	3.42294	1.77524	3.47166e-06	0.000111534
Cre05.g237000.t1.2	320.968	156.228	485.708	3.10897	1.63644	3.54956e-06	0.00011334	methionine aminopeptidase 1D
Cre02.g075950.t1.3	46.3958	16.4001	76.3915	4.65799	2.21971	3.56005e-06	0.000113444		>XP_001701842 predicted protein, partial [Chlamydomonas reinhardtii].
g16783.t1	598.857	134.386	1063.33	7.91247	2.98413	3.71202e-06	0.000117897		>XP_001698879 hypothetical protein CHLREDRAFT_193404 [Chlamydomonas reinhardtii].
g11469.t1	109.082	49.1499	169.014	3.43875	1.78188	3.78529e-06	0.00011989	glyoxal oxidase-related protein	>XP_001701421 glyoxal or galactose oxidase [Chlamydomonas reinhardtii].
g16811.t1	102.011	46.0626	157.96	3.42924	1.77789	3.82263e-06	0.000120829		>XP_001698923 hypothetical protein CHLREDRAFT_151984 [Chlamydomonas reinhardtii].
Cre03.g183250.t1.2	618.067	166.86	1069.27	6.4082	2.67992	4.11027e-06	0.00012914		>XP_002946911 hypothetical protein VOLCADRAFT_86984 [Volvox carteri f. nagariensis].
g4619.t1	23.925	5.89775	41.9522	7.11326	2.83051	4.20894e-06	0.000131975		>XP_001701139 hypothetical protein CHLREDRAFT_194351 [Chlamydomonas reinhardtii].
g17713.t1	103.297	37.7799	168.815	4.46838	2.15975	4.24376e-06	0.000132802
g18231.t1	30.0451	9.89328	50.197	5.07385	2.34308	4.36162e-06	0.000135947		>XP_001703800 predicted protein [Chlamydomonas reinhardtii].
Cre10.g446200.t1.2	167.084	75.4906	258.678	3.42662	1.77679	4.6954e-06	0.000146061		>XP_001698468 hypothetical protein CHLREDRAFT_187586 [Chlamydomonas reinhardtii].
Cre06.g290450.t1.2	392.433	206.808	578.058	2.79515	1.48293	4.90249e-06	0.0001516	RNA-binding protein-defense related 1	>XP_002947818 hypothetical protein VOLCADRAFT_88093 [Volvox carteri f. nagariensis].
Cre01.g044550.t1.2	64.0055	21.0129	106.998	5.09202	2.34824	5.18555e-06	0.000160037		>XP_001689715 predicted protein [Chlamydomonas reinhardtii].
g5273.t2	11.1301	1.15039	21.1098	18.3502	4.19772	5.20756e-06	0.000160098	glyoxal oxidase-related protein	>XP_002957759 hypothetical protein VOLCADRAFT_98850 [Volvox carteri f. nagariensis].
g16775.t1	5656.91	1388.36	9925.46	7.14903	2.83775	5.20794e-06	0.000160098	secE/sec61-gamma protein transport protein	>XP_001698939 SEC61-gamma subunit or ER translocon [Chlamydomonas reinhardtii].
g695.t1	226.261	92.1102	360.412	3.91284	1.96822	5.27711e-06	0.000161907	Protein kinase superfamily protein	>XP_001689586 predicted protein [Chlamydomonas reinhardtii].
Cre02.g074700.t1.2	1328.36	377.98	2278.75	6.02876	2.59186	5.30146e-06	0.000162336		>XP_001701626 predicted protein [Chlamydomonas reinhardtii].
Cre10.g421079.t1.2	169.097	78.4696	259.725	3.30988	1.72678	5.35548e-06	0.000163671
Cre17.g702550.t1.2	648.844	172.878	1124.81	6.50636	2.70185	5.63288e-06	0.000171147		>XP_001691592 predicted protein, partial [Chlamydomonas reinhardtii].
g6305.t1	7545.26	3045.69	12044.8	3.95471	1.98357	5.64375e-06	0.000171147		>XP_001698015 cell wall protein pherophorin-C3 [Chlamydomonas reinhardtii].
Cre13.g591900.t1.2	595.756	307.061	884.451	2.88038	1.52626	5.75179e-06	0.000174086		>XP_001693080 predicted protein [Chlamydomonas reinhardtii].
Cre16.g693400.t1.3	140.486	66.3244	214.647	3.23632	1.69435	5.84929e-06	0.000176356		>XP_001699307 hypothetical protein CHLREDRAFT_193726 [Chlamydomonas reinhardtii].
Cre09.g395900.t1.2	57.7151	23.6196	91.8106	3.88704	1.95867	5.91125e-06	0.000177882		>XP_001694604 predicted protein [Chlamydomonas reinhardtii].
Cre10.g456500.t1.3	82.3987	37.1506	127.647	3.43593	1.7807	5.93268e-06	0.000178185
Cre16.g691621.t1.2	18.4902	2.21354	34.7668	15.7064	3.97328	6.19824e-06	0.00018545
Cre17.g738600.t1.3	188.705	79.7274	297.682	3.73375	1.90063	6.34539e-06	0.000189491		>XP_001699591 hypothetical protein CHLREDRAFT_36449 [Chlamydomonas reinhardtii].
g2170.t1	22.202	6.12184	38.2822	6.25339	2.64464	6.37985e-06	0.000190158
Cre13.g570800.t1.2	146.861	31.8264	261.896	8.22888	3.0407	6.41844e-06	0.000190946		>XP_001693472 predicted protein, partial [Chlamydomonas reinhardtii].
Cre04.g214800.t1.2	86.2389	28.7738	143.704	4.99427	2.32027	6.50726e-06	0.000193221	vesicle-associated membrane protein 713	>XP_001698701 R-SNARE protein, VAMP-like family [Chlamydomonas reinhardtii].
Cre12.g530350.t1.3	84.5913	38.5107	130.672	3.39313	1.76262	6.52264e-06	0.000193312	ZIP metal ion transporter family	>XP_001693046 iron-nutrition responsive ZIP family transporter [Chlamydomonas reinhardtii].
Cre16.g681300.t1.2	15.951	3.63459	28.2674	7.77734	2.95928	6.69512e-06	0.000198049		>XP_001701172 hypothetical protein CHLREDRAFT_194236 [Chlamydomonas reinhardtii].
Cre01.g037250.t1.2	991.306	516.14	1466.47	2.84123	1.50651	6.86783e-06	0.000202776		>XP_001690112 predicted protein [Chlamydomonas reinhardtii].
g5503.t1	3045.49	1585.96	4505.01	2.84055	1.50617	6.8982e-06	0.000203289		>XP_001697717 cell wall protein pherophorin-C17 [Chlamydomonas reinhardtii].
g18290.t1	19.6789	1.70678	37.6509	22.0597	4.46334	6.93688e-06	0.000204046
g8397.t1	35.2989	11.9963	58.6015	4.88497	2.28835	7.12653e-06	0.000208841		>XP_001702292 hypothetical protein CHLREDRAFT_194753 [Chlamydomonas reinhardtii].
Cre06.g307900.t1.2	34.4187	9.45121	59.3862	6.28345	2.65156	7.41149e-06	0.000216786		>XP_001691365 flagellar associated protein [Chlamydomonas reinhardtii].
g10412.t1	584.046	205.593	962.498	4.68157	2.22699	7.50064e-06	0.000218985	ATP synthase epsilon chain, mitochondrial	>XP_001702609 F1F0 ATP synthase epsilon subunit [Chlamydomonas reinhardtii].
Cre06.g309450.t1.2	173.342	86.5274	260.157	3.00665	1.58815	7.72645e-06	0.000225159	carboxypeptidase D, putative	>XP_001691209 hypothetical protein CHLREDRAFT_144853 [Chlamydomonas reinhardtii].
Cre13.g587250.t1.3	225.236	111.685	338.787	3.03342	1.60094	7.78829e-06	0.00022654		>XP_001693871 predicted protein [Chlamydomonas reinhardtii].
Cre01.g048600.t1.3	42.7799	15.3369	70.2229	4.57868	2.19493	7.85859e-06	0.000228161	ARM repeat superfamily protein	>XP_001690228 predicted protein, partial [Chlamydomonas reinhardtii].
Cre08.g374550.t1.2	28.8251	8.682	48.9683	5.64021	2.49575	7.95547e-06	0.000230518
g4443.t1	115.903	54.1446	177.66	3.28122	1.71423	8.24912e-06	0.000238176		>XP_001699399 predicted protein [Chlamydomonas reinhardtii].
Cre08.g385683.t1.2	349.02	178.178	519.862	2.91765	1.54481	8.30759e-06	0.000239423
g9921.t1	45.2695	16.4001	74.1388	4.52063	2.17653	8.41054e-06	0.000241946		>XP_001694730 predicted protein [Chlamydomonas reinhardtii].
g16102.t1	260.919	10.7008	511.137	47.766	5.57791	8.58138e-06	0.000245958
Cre13.g565550.t1.2	138.104	60.1207	216.087	3.59422	1.84568	8.62768e-06	0.000246662	DNA-directed RNA polymerase, RBP11-like	>XP_001693682 DNA-directed RNA polymerase II, 13.6 kDa polypeptide [Chlamydomonas reinhardtii].
Cre02.g073800.t1.2	128.715	60.7996	196.63	3.23407	1.69335	8.6374e-06	0.000246662		>XP_001701618 predicted protein [Chlamydomonas reinhardtii].
Cre16.g661000.t1.2	229.598	112.892	346.305	3.06759	1.6171	8.85218e-06	0.000252336		>XP_001697939 hypothetical protein CHLREDRAFT_95738, partial [Chlamydomonas reinhardtii].
g2600.t1	19.9525	1.01353	38.8914	38.3722	5.26199	8.89407e-06	0.000253041		>XP_001691502 hypothetical protein CHLREDRAFT_181583, partial [Chlamydomonas reinhardtii].
g7686.t1	12.0496	1.49701	22.6021	15.0982	3.9163	9.06984e-06	0.000257137
Cre03.g162000.t1.2	806.906	177.327	1436.48	8.10075	3.01806	9.45891e-06	0.000265765	Nucleotide-sugar transporter family protein	>XP_001703558 phosphate/phosphoenolpyruvate translocator protein [Chlamydomonas reinhardtii].
Cre07.g355500.t1.1	326.264	166.494	486.034	2.91923	1.54559	9.45031e-06	0.000265765	Yippee family putative zinc-binding protein	>XP_001702057 predicted protein [Chlamydomonas reinhardtii].
g6329.t1	32.2043	10.9099	53.4988	4.90372	2.29388	9.69224e-06	0.000271833	Disease resistance protein (TIR-NBS-LRR class) family	>XP_001698002 hypothetical protein CHLREDRAFT_192974, partial [Chlamydomonas reinhardtii].
Cre06.g271000.t1.2	2046.66	821.399	3271.92	3.98335	1.99398	9.78412e-06	0.000273432		>XP_001696494 hypothetical protein CHLREDRAFT_142112, partial [Chlamydomonas reinhardtii].
Cre01.g008650.t1.3	398.413	214.418	582.408	2.71623	1.4416	9.95163e-06	0.000277619	CDK-activating kinase 4
Cre17.g731700.t1.3	243.602	124.083	363.122	2.92643	1.54914	1.00083e-05	0.000278703	flavin-dependent monooxygenase 1	>XP_001701533 flavin-containing monooxygenase [Chlamydomonas reinhardtii].
Cre01.g027300.t1.3	167.342	63.8558	270.828	4.24124	2.08449	1.01875e-05	0.00028319
g9967.t1	110.573	51.2266	169.92	3.31702	1.72989	1.02701e-05	0.000284479		>XP_001697633 predicted protein [Chlamydomonas reinhardtii].
Cre01.g036150.t1.2	185.043	91.6071	278.48	3.03994	1.60404	1.02533e-05	0.000284479	Calcium-binding EF-hand family protein	>XP_003059020 EF hand domain-containing protein [Micromonas pusilla CCMP1545].
g6357.t1	112.857	45.9627	179.751	3.9108	1.96746	1.09573e-05	0.000302444	beta-hydroxyisobutyryl-CoA hydrolase 1	>XP_001697990 hypothetical protein CHLREDRAFT_151307 [Chlamydomonas reinhardtii].
Cre13.g575700.t1.3	896.924	169.07	1624.78	9.61009	3.26455	1.11765e-05	0.000307952		>XP_001693767 predicted protein [Chlamydomonas reinhardtii].
Cre01.g000500.t1.3	68.575	29.6046	107.545	3.63272	1.86105	1.12999e-05	0.000310807	xyloglucanase 113	>XP_001697686 hypothetical protein CHLREDRAFT_195312 [Chlamydomonas reinhardtii].
Cre12.g507800.t1.2	349.485	171.896	527.075	3.06625	1.61647	1.16282e-05	0.000319277		>XP_001692564 predicted protein [Chlamydomonas reinhardtii].
g1737.t1	75.2436	35.3445	115.143	3.25772	1.70386	1.20724e-05	0.000330894		>XP_001701986 hypothetical protein CHLREDRAFT_141551 [Chlamydomonas reinhardtii].
Cre03.g194400.t1.2	2600.34	1075.56	4125.13	3.83534	1.93935	1.28521e-05	0.000350427	Transducin/WD40 repeat-like superfamily protein	>XP_001693266 eukaryotic initiation factor [Chlamydomonas reinhardtii].
Cre10.g465250.t1.2	21.856	5.25718	38.4547	7.3147	2.8708	1.29743e-05	0.000353145		>XP_001698630 radial spoke protein 11 [Chlamydomonas reinhardtii].
Cre07.g355300.t1.2	49.6018	20.1685	79.0352	3.91875	1.97039	1.32624e-05	0.000360361	Bestrophin-like protein	>XP_001702055 hypothetical protein CHLREDRAFT_153968 [Chlamydomonas reinhardtii].
g10432.t1	102.267	23.7069	180.827	7.62763	2.93123	1.3372e-05	0.000362082
g15104.t1	6.86427	0	13.7285	Inf	Inf	1.44188e-05	0.000388416	Sulfite exporter TauE/SafE family protein	>XP_002945615 hypothetical protein VOLCADRAFT_85767 [Volvox carteri f. nagariensis].
Cre01.g040750.t1.1	51.1324	20.6317	81.6331	3.95668	1.98429	1.46066e-05	0.000392128		>XP_001703158 hypothetical protein CHLREDRAFT_181376, partial [Chlamydomonas reinhardtii].
Cre16.g687700.t1.2	691.142	368.526	1013.76	2.75084	1.45987	1.48407e-05	0.000397731		>XP_001692108 hypothetical protein CHLREDRAFT_145631 [Chlamydomonas reinhardtii].
Cre17.g725000.t1.1	705.658	395.143	1016.17	2.57166	1.3627	1.49871e-05	0.000400968		>XP_001697238 hypothetical protein CHLREDRAFT_192491 [Chlamydomonas reinhardtii].
g9615.t1	113.759	52.0342	175.483	3.37246	1.7538	1.52505e-05	0.000407322		>XP_001695047 predicted protein [Chlamydomonas reinhardtii].
Cre17.g721700.t1.2	293.723	151.78	435.665	2.87036	1.52123	1.54282e-05	0.000411367	Pentapeptide repeat-containing protein	>XP_001697120 thylakoid lumenal protein [Chlamydomonas reinhardtii].
g11990.t1	110.871	54.0311	167.711	3.10398	1.63412	1.54608e-05	0.000411535
g7021.t1	212.901	108.572	317.229	2.92183	1.54687	1.58629e-05	0.000421522		>XP_001691410 hypothetical protein CHLREDRAFT_188887, partial [Chlamydomonas reinhardtii].
Cre06.g275250.t1.2	84.3745	38.1152	130.634	3.42734	1.77709	1.62127e-05	0.000428639		>XP_001696181 hypothetical protein CHLREDRAFT_187000 [Chlamydomonas reinhardtii].
Cre03.g172450.t1.2	77.9103	37.5348	118.286	3.15137	1.65598	1.67556e-05	0.000441504
Cre10.g429250.t1.3	90.6475	43.9656	137.329	3.12356	1.64319	1.79886e-05	0.000471614	ACT-like protein tyrosine kinase family protein
Cre12.g534100.t1.2	361.705	197.596	525.814	2.66105	1.412	1.83157e-05	0.000479388	B-box type zinc finger protein with CCT domain	>XP_001692899 predicted protein [Chlamydomonas reinhardtii].
Cre14.g616550.t1.3	146.39	72.7258	220.054	3.0258	1.59732	1.86209e-05	0.000486564		>XP_001690272 guanylate cyclase, partial [Chlamydomonas reinhardtii].
Cre03.g198200.t1.3	116.926	58.7634	175.088	2.97955	1.57509	1.90847e-05	0.000497026	glucan synthase-like 11	>XP_001693160 glycosyl transferase, partial [Chlamydomonas reinhardtii].
Cre10.g440450.t1.2	1679.12	907.881	2450.36	2.69898	1.43242	1.9773e-05	0.000514098	photosystem II reaction center PSB28 protein	>XP_001690537 photosystem II subunit 28 [Chlamydomonas reinhardtii].
Cre06.g258250.t1.3	44.4609	15.4331	73.4886	4.76174	2.25149	2.00123e-05	0.000519459		>XP_001696352 hypothetical protein CHLREDRAFT_187215 [Chlamydomonas reinhardtii].
g18171.t1	17.3289	3.87069	30.7871	7.95389	2.99166	2.04801e-05	0.000530722		>XP_001695540 predicted protein, partial [Chlamydomonas reinhardtii].
Cre13.g569050.t1.3	21.9977	1.03987	42.9555	41.3085	5.36837	2.06948e-05	0.000535402		>XP_001693456 predicted protein [Chlamydomonas reinhardtii].
g15841.t1	33.5804	11.6791	55.4816	4.75052	2.24809	2.19456e-05	0.000564964		>XP_001694231 predicted protein [Chlamydomonas reinhardtii].
Cre06.g278400.t1.2	828.071	373.092	1283.05	3.43896	1.78197	2.21054e-05	0.000567487		>XP_001695414 predicted protein [Chlamydomonas reinhardtii].
Cre12.g498850.t1.2	1084.96	587.464	1582.46	2.69372	1.4296	2.2116e-05	0.000567487	Cysteine proteinases superfamily protein	>XP_001702343 hypothetical protein CHLREDRAFT_108071 [Chlamydomonas reinhardtii].
Cre06.g272400.t1.2	114.785	21.2572	208.312	9.79958	3.29272	2.2826e-05	0.000582845	Phosphatidic acid phosphatase (PAP2) family protein	>XP_002945878 hypothetical protein VOLCADRAFT_86283 [Volvox carteri f. nagariensis].
Cre11.g477550.t1.2	420.556	233.56	607.552	2.60126	1.37921	2.30473e-05	0.000587538		>XP_001697358 hypothetical protein CHLREDRAFT_192861 [Chlamydomonas reinhardtii].
Cre17.g708850.t1.3	13.4394	2.0534	24.8255	12.09	3.59574	2.31025e-05	0.000587988		>XP_002955911 hypothetical protein VOLCADRAFT_96821 [Volvox carteri f. nagariensis].
Cre11.g468950.t1.2	3522.46	1497.24	5547.69	3.70528	1.88958	2.35306e-05	0.000595982	ubiquinol-cytochrome C reductase UQCRX/QCR9-like family protein	>XP_001699549 ubiquinol:cytochrome c oxidoreductase 7 kDa subunit [Chlamydomonas reinhardtii].
Cre17.g740700.t1.2	218.277	112.74	323.813	2.87222	1.52217	2.3507e-05	0.000595982		>XP_001701105 hypothetical protein CHLREDRAFT_194199 [Chlamydomonas reinhardtii].
g7561.t1	14285.3	3172.13	25398.4	8.00673	3.00121	2.37844e-05	0.000601438	Ribosomal L38e protein family	>XP_001702878 ribosomal protein L38, component of cytosolic 80S ribosome and 60S large subunit [Chlamydomonas reinhardtii].
Cre16.g666653.t1.2	6.47691	0	12.9538	Inf	Inf	2.43369e-05	0.000614401
Cre07.g335700.t1.2	355.896	129.113	582.679	4.51295	2.17407	2.43754e-05	0.000614401		>XP_001700101 predicted protein, partial [Chlamydomonas reinhardtii].
Cre02.g077000.t1.3	294.606	60.7807	528.431	8.69405	3.12003	2.53299e-05	0.000633369	expansin A15	>XP_001701646 predicted protein [Chlamydomonas reinhardtii].
Cre13.g571200.t1.3	251.576	129.546	373.605	2.88396	1.52805	2.65537e-05	0.000661859	histidine kinase 3	>EIE24815 hypothetical protein COCSUDRAFT_46955 [Coccomyxa subellipsoidea C-169].
Cre04.g216100.t1.3	981.383	310.103	1652.66	5.32939	2.41397	2.68384e-05	0.000667892	lactoylglutathione lyase family protein / glyoxalase I family protein	>XP_001698653 hypothetical protein CHLREDRAFT_106176 [Chlamydomonas reinhardtii].
Cre05.g241600.t1.2	101.035	47.5777	154.492	3.24716	1.69918	2.6946e-05	0.00066845		>XP_001700726 hypothetical protein CHLREDRAFT_205574 [Chlamydomonas reinhardtii].
g7353.t1	1406.22	800.881	2011.56	2.51168	1.32865	2.69184e-05	0.00066845		>XP_001700822 hypothetical protein CHLREDRAFT_142737, partial [Chlamydomonas reinhardtii].
Cre16.g654400.t1.2	60.6861	26.3693	95.0029	3.60278	1.84911	2.74756e-05	0.000679435		>XP_001698208 hypothetical protein CHLREDRAFT_193128 [Chlamydomonas reinhardtii].
g2938.t1	18.8871	3.06693	34.7073	11.3166	3.50037	2.75713e-05	0.00068073		>XP_001695617 hypothetical protein CHLREDRAFT_192003 [Chlamydomonas reinhardtii].
Cre10.g432450.t1.3	300.422	160.151	440.693	2.75173	1.46034	2.83247e-05	0.000691706		>XP_001702488 chromosome condensation complex protein [Chlamydomonas reinhardtii].
Cre12.g498200.t1.2	22.2443	7.13537	37.3533	5.23496	2.38818	2.88577e-05	0.000703625		>XP_001702349 flagellar associated protein [Chlamydomonas reinhardtii].
g16985.t1	37252.1	8478.5	66025.7	7.78743	2.96115	2.90213e-05	0.000706368
Cre10.g459750.t1.2	415.171	204.078	626.263	3.06874	1.61765	3.01311e-05	0.000727882		>XP_001698399 NADH:ubiquinone oxidoreductase 8 kDa subunit [Chlamydomonas reinhardtii].	H+ or Na+-translocating NADH dehydrogenase (NDH) family.	3.D.1.6.4
Cre03.g187500.t1.2	535.801	285.465	786.138	2.75389	1.46147	3.02019e-05	0.00072847	Phosphotyrosine protein phosphatases superfamily protein	>XP_001691851 hypothetical protein CHLREDRAFT_145427 [Chlamydomonas reinhardtii].
g6450.t1	7.87841	0.346623	15.4102	44.4581	5.47438	3.05741e-05	0.000735185		>BAA25763 reverse transcriptase [Chlorella vulgaris].
Cre04.g223850.t1.2	63.9914	11.6648	116.318	9.97175	3.31785	3.05444e-05	0.000735185	RNAhelicase-like 8	>XP_001692202 cytoplasmic DExD/H-box RNA helicase [Chlamydomonas reinhardtii].	nuclear mRNA exporter (mRNA-E) family.	3.A.18.1.1
g8167.t1	9.57807	1.15039	18.0058	15.6519	3.96827	3.09754e-05	0.000743695
Cre14.g626100.t1.3	10.592	1.49701	19.6869	13.1508	3.71708	3.12534e-05	0.000749221		>XP_001692707 predicted protein [Chlamydomonas reinhardtii].
Cre03.g182300.t1.3	81.7444	38.1851	125.304	3.28148	1.71435	3.13086e-05	0.0007494	Phosphoglycerate mutase family protein	>XP_002946902 hypothetical protein VOLCADRAFT_86965 [Volvox carteri f. nagariensis].
g14436.t1	8.19281	0.506765	15.8789	31.3338	4.96965	3.21315e-05	0.000764426		>XP_001693885 predicted protein, partial [Chlamydomonas reinhardtii].
Cre02.g076950.t1.3	696.884	399.373	994.395	2.48989	1.31608	3.25388e-05	0.000771775	subtilase 4.13	>XP_001701645 predicted protein [Chlamydomonas reinhardtii].
g17090.t1	9.38076	0.803762	17.9578	22.3421	4.4817	3.26346e-05	0.000772878		>XP_001691726 predicted protein [Chlamydomonas reinhardtii].
Cre08.g366650.t1.3	78.1709	32.6582	123.684	3.78722	1.92114	3.29089e-05	0.000775262		>XP_001696055 hypothetical protein CHLREDRAFT_175626 [Chlamydomonas reinhardtii].
Cre05.g240150.t1.2	75.2215	31.4784	118.965	3.77925	1.9181	3.28524e-05	0.000775262	peroxin4	>XP_001697709 hypothetical protein CHLREDRAFT_131472 [Chlamydomonas reinhardtii].	peroxisomal protein importer (PPI) family.	3.A.20.1.1
Cre06.g292550.t1.2	2362.86	1305.38	3420.33	2.62019	1.38967	3.29293e-05	0.000775262	type one serine/threonine protein phosphatase 4	>XP_001701579 protein phosphatase 1 [Chlamydomonas reinhardtii].
Cre02.g147250.t1.3	12.0752	2.00377	22.1466	11.0525	3.4663	3.31815e-05	0.000779936		>XP_001695617 hypothetical protein CHLREDRAFT_192003 [Chlamydomonas reinhardtii].
g4430.t1	69.5069	32.0279	106.986	3.34039	1.74002	3.37878e-05	0.000791817	alpha/beta-Hydrolases superfamily protein	>XP_001699396 predicted protein, partial [Chlamydomonas reinhardtii].
Cre17.g700750.t1.2	103753	19476.4	188029	9.65422	3.27116	3.52837e-05	0.00082074		>XP_001691606 predicted protein [Chlamydomonas reinhardtii].
g1769.t1	10195.3	3231.36	17159.2	5.31023	2.40877	3.55007e-05	0.000824562	Rieske (2Fe-2S) domain-containing protein	>XP_001701993 rieske ferredoxin [Chlamydomonas reinhardtii].
g4442.t1	9.57169	1.31053	17.8329	13.6074	3.76632	3.62415e-05	0.000838044
Cre02.g118050.t1.2	179.318	92.9997	265.636	2.85631	1.51415	3.6896e-05	0.000851923	cyclin p4;1	>XP_002956581 cyclin [Volvox carteri f. nagariensis].
Cre12.g491150.t1.3	821.463	197.245	1445.68	7.32935	2.87369	3.7107e-05	0.000855535	Vacuolar protein sorting 55 (VPS55) family protein	>XP_001690943 vacuolar trafficking protein [Chlamydomonas reinhardtii].
Cre10.g417600.t1.3	53.0776	20.6896	85.4657	4.13086	2.04644	3.93612e-05	0.000904846
Cre03.g203500.t1.2	7.72636	0.506765	14.946	29.4929	4.88229	4.01498e-05	0.000921624	Protein kinase superfamily protein	>XP_001693200 predicted protein, partial [Chlamydomonas reinhardtii].
g17233.t1	517.195	216.669	817.721	3.77406	1.91612	4.02176e-05	0.00092183		>XP_002955918 hypothetical protein VOLCADRAFT_96837 [Volvox carteri f. nagariensis].
Cre07.g329000.t1.2	564.623	315.967	813.279	2.57393	1.36398	4.03179e-05	0.000922779	Protein of unknown function (DUF3464)	>XP_001690643 predicted membrane protein [Chlamydomonas reinhardtii].
Cre10.g421900.t1.3	26.2416	8.84519	43.638	4.93353	2.30262	4.13055e-05	0.000942632		>XP_001702595 predicted protein [Chlamydomonas reinhardtii].
Cre09.g388700.t1.3	210.079	115.526	304.632	2.63691	1.39885	4.17419e-05	0.000951207	Protein kinase superfamily protein	>XP_001694544 predicted protein [Chlamydomonas reinhardtii].
Cre14.g610700.t1.3	44.5146	17.6264	71.4028	4.05089	2.01824	4.2338e-05	0.00096339
Cre09.g413500.t1.3	550.088	129.307	970.87	7.50827	2.90848	4.30116e-05	0.000977297	Arabidopsis thaliana protein of unknown function (DUF821)	>XP_001702457 predicted protein [Chlamydomonas reinhardtii].
Cre06.g295100.t1.3	20.8996	6.6286	35.1706	5.30589	2.40759	4.31247e-05	0.000978449		>XP_001701554 predicted protein, partial [Chlamydomonas reinhardtii].
Cre12.g554700.t1.2	295.62	94.3509	496.889	5.26639	2.39681	4.38091e-05	0.000991109	Synaptobrevin family protein	>XP_001694037 R-SNARE protein, Sec22-family [Chlamydomonas reinhardtii].
Cre14.g611400.t1.2	229.873	117.473	342.272	2.91361	1.54281	4.37569e-05	0.000991109		>XP_001699023 hypothetical protein CHLREDRAFT_193428 [Chlamydomonas reinhardtii].
Cre09.g416650.t1.2	924.52	286.994	1562.05	5.44277	2.44434	4.42393e-05	0.000999401	xyloglucanase 113	>XP_002950969 hypothetical protein VOLCADRAFT_91495 [Volvox carteri f. nagariensis].
g11253.t1	17.8653	3.72181	32.0089	8.60034	3.10439	4.46444e-05	0.0010071		>XP_001698390 predicted protein, partial [Chlamydomonas reinhardtii].
Cre14.g621850.t1.3	65.1164	28.9295	101.303	3.50173	1.80807	4.51808e-05	0.00101774		>XP_001690317 predicted protein [Chlamydomonas reinhardtii].
Cre10.g420850.t1.3	16.4909	1.01353	31.9682	31.5414	4.97918	4.54775e-05	0.00102174		>XP_001702607 predicted protein [Chlamydomonas reinhardtii].
Cre01.g005000.t1.3	186.274	99.066	273.482	2.7606	1.46498	4.54889e-05	0.00102174		>XP_001702128 hypothetical protein CHLREDRAFT_185795 [Chlamydomonas reinhardtii].
Cre12.g490050.t1.2	224.369	116.515	332.223	2.85134	1.51164	4.55715e-05	0.00102213	golgi nucleotide sugar transporter 1	>XP_001690931 GDP-Mannose transporter, golgi apparatus [Chlamydomonas reinhardtii].	drug/metabolite transporter (DMT) superfamily.	2.A.7.13.3
Cre08.g358500.t1.2	193.062	98.5103	287.614	2.91963	1.54579	4.60634e-05	0.00103169		>XP_001702292 hypothetical protein CHLREDRAFT_194753 [Chlamydomonas reinhardtii].
Cre12.g496900.t1.3	9.09046	0.853388	17.3275	20.3044	4.34372	4.63676e-05	0.0010326		>XP_001701198 hypothetical protein CHLREDRAFT_194231, partial [Chlamydomonas reinhardtii].
Cre14.g625650.t1.2	42.3259	15.2617	69.39	4.54666	2.18481	4.6172e-05	0.0010326		>XP_001698343 hypothetical protein CHLREDRAFT_168087 [Chlamydomonas reinhardtii].
Cre06.g290050.t1.2	60.7532	28.2708	93.2356	3.29795	1.72157	4.62537e-05	0.0010326		>XP_002958304 hypothetical protein VOLCADRAFT_108081, partial [Volvox carteri f. nagariensis].
g1863.t1	259.861	141.857	377.865	2.6637	1.41343	4.78052e-05	0.0010586	Inosine triphosphate pyrophosphatase family protein	>XP_001701193 hypothetical protein CHLREDRAFT_179025 [Chlamydomonas reinhardtii].
g17737.t1	8.2055	0	16.411	Inf	Inf	4.84847e-05	0.00107062		>XP_001693054 predicted protein, partial [Chlamydomonas reinhardtii].
Cre12.g528150.t1.2	272.791	43.4829	502.099	11.547	3.52945	4.90329e-05	0.00107969	Oligosaccharyltransferase complex/magnesium transporter family protein	>XP_001696867 hypothetical protein CHLREDRAFT_138808 [Chlamydomonas reinhardtii].
Cre05.g230650.t1.3	40.6994	17.882	63.5169	3.55199	1.82863	4.97356e-05	0.00109209
g9847.t1	153.218	84.168	222.268	2.64077	1.40096	5.16611e-05	0.00112967		>XP_001694792 predicted protein [Chlamydomonas reinhardtii].
g11623.t1	88.9655	41.0859	136.845	3.3307	1.73583	5.17479e-05	0.00112995		>XP_001692841 predicted protein [Chlamydomonas reinhardtii].
Cre03.g197650.t1.2	254.689	134.543	374.836	2.786	1.47819	5.25372e-05	0.00114559	Plastid-lipid associated protein PAP / fibrillin family protein	>XP_001693298 predicted protein [Chlamydomonas reinhardtii].
Cre03.g206650.t1.2	98.0801	51.5814	144.579	2.80292	1.48693	5.56497e-05	0.00120842	phosphoenolpyruvate carboxylase-related kinase 1	>XP_001693178 predicted protein [Chlamydomonas reinhardtii].
g6721.t1	499.133	268.038	730.229	2.72435	1.44591	5.59364e-05	0.00121296		>XP_001695518 predicted protein [Chlamydomonas reinhardtii].
g11650.t2	63.3077	13.688	112.927	8.2501	3.04441	5.62168e-05	0.00121736	Protein kinase superfamily protein	>XP_002957519 hypothetical protein VOLCADRAFT_107729 [Volvox carteri f. nagariensis].
Cre08.g362700.t1.2	44.3152	19.9091	68.7214	3.45176	1.78733	5.63618e-05	0.00121765	S-adenosyl-L-methionine-dependent methyltransferases superfamily protein	>XP_001696099 hypothetical protein CHLREDRAFT_104798, partial [Chlamydomonas reinhardtii].
Cre10.g462400.t1.3	112.957	59.2995	166.615	2.80972	1.49043	5.63855e-05	0.00121765
Cre03.g156950.t1.1	843.228	301.646	1384.81	4.59085	2.19876	5.84768e-05	0.00125934		>XP_001697451 ubiquinol:cytochrome c oxidoreductase 9 kDa subunit [Chlamydomonas reinhardtii].
g11608.t1	200.103	108.418	291.789	2.69134	1.42833	5.89773e-05	0.00126838	histidine kinase 2	>XP_001698789 chlamyopsin-6 [Chlamydomonas reinhardtii].
Cre06.g282500.t1.2	79548.7	12224	146873	12.0152	3.58679	5.98988e-05	0.00128643	ribosomal protein L23AA	>XP_001695451 ribosomal protein L23a, component of cytosolic 80S ribosome and 60S large subunit [Chlamydomonas reinhardtii].
Cre16.g652200.t1.2	580.369	333.898	826.841	2.47633	1.3082	6.08459e-05	0.00130142		>XP_001699431 metalloproteinase of VMP family [Chlamydomonas reinhardtii].
Cre16.g655750.t1.2	130.676	64.7733	196.579	3.03487	1.60164	6.1406e-05	0.00131161		>XP_001697824 tektin, flagellar protein associated with inner arm dynein [Chlamydomonas reinhardtii].
Cre13.g589000.t1.2	98.0541	37.9776	158.131	4.16379	2.0579	6.21129e-05	0.0013249		>XP_001693642 predicted protein [Chlamydomonas reinhardtii].
Cre06.g310950.t1.2	136.754	67.214	206.294	3.06921	1.61787	6.28266e-05	0.00133831		>XP_002946802 hypothetical protein VOLCADRAFT_87151 [Volvox carteri f. nagariensis].
Cre03.g194750.t1.3	1857.38	1108.35	2606.41	2.35161	1.23365	6.86396e-05	0.00145817
g7613.t1	12.2603	2.00377	22.5168	11.2372	3.49021	6.97986e-05	0.00148079
g2764.t1	14.6662	3.82107	25.5113	6.67648	2.73909	7.07011e-05	0.00149791		>XP_001700679 predicted protein [Chlamydomonas reinhardtii].
Cre03.g207200.t1.1	180.323	92.5463	268.1	2.89693	1.53452	7.41453e-05	0.00156243	SEC14 cytosolic factor family protein / phosphoglyceride transfer family protein	>XP_001693318 lipid-binding protein [Chlamydomonas reinhardtii].
Cre02.g118100.t1.2	240.774	131.147	350.401	2.67183	1.41783	7.46644e-05	0.00157126		>XP_001702427 predicted protein, partial [Chlamydomonas reinhardtii].
Cre12.g561750.t1.2	9.99546	1.65715	18.3338	11.0634	3.46773	7.66946e-05	0.00160751		>XP_001702142 hypothetical protein CHLREDRAFT_181247, partial [Chlamydomonas reinhardtii].
Cre06.g278800.t1.2	759.016	413.208	1104.82	2.67377	1.41888	7.70611e-05	0.00161304	Peroxisomal membrane 22 kDa (Mpv17/PMP22) family protein	>XP_001695296 peroxisomal membrane MPV17/PMP22-like protein [Chlamydomonas reinhardtii].
Cre13.g584100.t1.3	679.047	401.727	956.367	2.38064	1.25135	7.81259e-05	0.00163314	PB1 domain-containing protein tyrosine kinase	>XP_002948854 hypothetical protein VOLCADRAFT_89150 [Volvox carteri f. nagariensis].
Cre03.g153200.t1.3	104.172	50.0537	158.291	3.16243	1.66103	7.85952e-05	0.00163858		>XP_001697477 predicted protein, partial [Chlamydomonas reinhardtii].
g256.t1	55.2731	27.1813	83.365	3.067	1.61683	8.05691e-05	0.00167751		>XP_001700289 predicted protein [Chlamydomonas reinhardtii].
Cre02.g106900.t1.2	109.042	59.7912	158.293	2.64743	1.40459	8.26552e-05	0.00171638		>XP_001699743 predicted protein [Chlamydomonas reinhardtii].
Cre02.g105300.t1.1	51.1959	16.9069	85.4849	5.05623	2.33806	8.36029e-05	0.00173376	ankyrin repeat family protein	>XP_001699758 flagellar associated protein [Chlamydomonas reinhardtii].
g1808.t1	8.48992	0.853388	16.1264	18.897	4.24008	8.39028e-05	0.00173539		>XP_001702148 hypothetical protein CHLREDRAFT_154157, partial [Chlamydomonas reinhardtii].
Cre12.g528050.t1.2	87.8039	40.6469	134.961	3.32032	1.73132	8.47539e-05	0.00174838	Tetratricopeptide repeat (TPR)-like superfamily protein	>XP_002953505 hypothetical protein VOLCADRAFT_94180, partial [Volvox carteri f. nagariensis].
Cre09.g415300.t1.3	176.944	33.219	320.669	9.6532	3.27101	8.5193e-05	0.00175267	Arabidopsis thaliana protein of unknown function (DUF821)	>XP_001696823 hypothetical protein CHLREDRAFT_184683 [Chlamydomonas reinhardtii].
Cre08.g377550.t1.2	473.584	258.065	689.102	2.67026	1.41698	8.52972e-05	0.00175267	Yippee family putative zinc-binding protein	>XP_001694372 predicted protein [Chlamydomonas reinhardtii].
g6303.t1	109.044	56.2597	161.829	2.87646	1.52429	8.59306e-05	0.00176338	CAP (Cysteine-rich secretory proteins, Antigen 5, and Pathogenesis-related 1 protein) superfamily protein	>XP_001698016 predicted extracellular protein, partial [Chlamydomonas reinhardtii].
Cre16.g689300.t1.3	8.46128	0.853388	16.0692	18.8299	4.23495	8.98543e-05	0.00183191	ACT-like protein tyrosine kinase family protein	>XP_001699256 serine/threonine protein kinase 24 [Chlamydomonas reinhardtii].
Cre07.g337400.t1.2	6.69607	0	13.3921	Inf	Inf	9.01764e-05	0.00183609
Cre17.g723500.t1.3	115.532	66.0845	164.979	2.49649	1.3199	9.06534e-05	0.0018434	pleiotropic drug resistance 3	>XP_001697137 hypothetical protein CHLREDRAFT_150517, partial [Chlamydomonas reinhardtii].	ATP-binding cassette (ABC) superfamily.	3.A.1.205.10
Cre06.g288600.t1.3	135.713	57.2469	214.179	3.74132	1.90355	9.10355e-05	0.00184877		>XP_001695510 predicted protein [Chlamydomonas reinhardtii].
Cre06.g289800.t1.2	142.723	75.1846	210.261	2.7966	1.48367	9.24002e-05	0.00187406		>XP_001695390 predicted protein [Chlamydomonas reinhardtii].
Cre03.g184400.t1.2	359.972	125.427	594.518	4.73995	2.24487	9.5331e-05	0.00192356	nudix hydrolase 1	>EFN51263 hypothetical protein CHLNCDRAFT_28196 [Chlorella variabilis].
Cre15.g643350.t1.3	90.5564	18.267	162.846	8.91474	3.15619	9.6664e-05	0.00194794	Nucleotide-sugar transporter family protein	>XP_001700696 plastidic phosphate translocator [Chlamydomonas reinhardtii].
Cre12.g498400.t1.3	57.1992	27.467	86.9313	3.16493	1.66217	9.72934e-05	0.0019556		>XP_002948031 hypothetical protein VOLCADRAFT_88236 [Volvox carteri f. nagariensis].
g15721.t1	671.026	362.499	979.554	2.70223	1.43415	9.8203e-05	0.00196883		>XP_001698254 hypothetical protein CHLREDRAFT_193194 [Chlamydomonas reinhardtii].
Cre10.g448950.t1.3	331.025	189.132	472.918	2.50047	1.3222	0.000101574	0.00202606	DNAse I-like superfamily protein	>XP_001698318 predicted protein, partial [Chlamydomonas reinhardtii].
Cre13.g574600.t1.2	206	110.612	301.388	2.72474	1.44612	0.000103891	0.00206963		>XP_001693515 predicted protein [Chlamydomonas reinhardtii].
Cre08.g362000.t1.2	71.8244	37.9919	105.657	2.78103	1.47562	0.000106558	0.00212006		>XP_001696011 flagella associated membrane protein [Chlamydomonas reinhardtii].
Cre01.g013700.t1.2	15.8022	3.55041	28.0539	7.90161	2.98215	0.00010752	0.0021365	voltage dependent anion channel 4	>XP_001689450 predicted protein [Chlamydomonas reinhardtii].
Cre11.g479800.t1.3	62.5277	28.6295	96.426	3.36807	1.75192	0.000107713	0.00213762	BTB/POZ domain-containing protein	>XP_001697321 hypothetical protein CHLREDRAFT_151197 [Chlamydomonas reinhardtii].
Cre09.g388150.t1.2	373.773	213.185	534.361	2.50655	1.32571	0.000108349	0.00214753	Ribosomal protein L36	>XP_001694538 mitochondrial ribosomal protein L36 [Chlamydomonas reinhardtii].
Cre13.g570200.t1.3	26.4112	8.03017	44.7923	5.578	2.47975	0.000112121	0.0022167		>XP_002949243 hypothetical protein VOLCADRAFT_104181 [Volvox carteri f. nagariensis].
Cre17.g702950.t1.2	95334.5	36533.6	154135	4.21901	2.0769	0.000113168	0.00223458		>XP_001691606 predicted protein [Chlamydomonas reinhardtii].
g14305.t1	103.725	55.7228	151.728	2.72291	1.44515	0.000113605	0.00224037		>XP_001693588 predicted protein [Chlamydomonas reinhardtii].
g4444.t1	68.2787	32.11	104.447	3.2528	1.70168	0.000120099	0.00235364		>XP_001699399 predicted protein [Chlamydomonas reinhardtii].
g11570.t1	626.658	336.111	917.205	2.72887	1.44831	0.000121295	0.00237411		>XP_001698808 hypothetical protein CHLREDRAFT_185214 [Chlamydomonas reinhardtii].
Cre12.g507300.t1.2	878.199	502.212	1254.19	2.49732	1.32038	0.000121697	0.00237901	Ribosomal protein S8e family protein	>XP_001690835 low-CO2-inducible protein [Chlamydomonas reinhardtii].
Cre03.g165900.t1.3	161.353	93.9854	228.721	2.43358	1.28308	0.000123004	0.00239857	Phosphoglycerate mutase family protein	>XP_001703529 predicted protein [Chlamydomonas reinhardtii].
g9273.t1	37.0417	17.2384	56.8449	3.29757	1.7214	0.000124893	0.0024324		>XP_001695097 predicted protein [Chlamydomonas reinhardtii].
g9917.t1	57.5513	27.3596	87.7429	3.20703	1.68124	0.000125078	0.00243297
Cre12.g510200.t1.2	205.284	118.61	291.958	2.46149	1.29953	0.000125563	0.00243939	Basic-leucine zipper (bZIP) transcription factor family protein	>XP_001691050 basic-leucine zipper transcription factor [Chlamydomonas reinhardtii].
Cre03.g201650.t1.3	213.233	124.545	301.921	2.4242	1.27751	0.000127326	0.00247056		>XP_001693356 predicted protein [Chlamydomonas reinhardtii].
g15694.t1	66.5872	34.9603	98.2141	2.8093	1.49021	0.000128398	0.00248592
Cre10.g462650.t1.2	193.007	104.402	281.612	2.69738	1.43156	0.000136486	0.00263526		>XP_001698608 predicted protein, partial [Chlamydomonas reinhardtii].
g9127.t1	233.421	74.6628	392.178	5.25266	2.39305	0.000140041	0.00270057		>XP_001695267 predicted protein [Chlamydomonas reinhardtii].
Cre08.g376550.t1.2	10.3543	0	20.7086	Inf	Inf	0.000142083	0.00273322
Cre12.g515200.t1.2	129.746	68.5154	190.976	2.78734	1.47889	0.000144725	0.00278064	F-box family protein	>XP_001703017 flagellar associated protein [Chlamydomonas reinhardtii].
Cre02.g097050.t1.2	1294.71	771.068	1818.36	2.35823	1.23771	0.000147653	0.00283343	zinc finger (C3HC4-type RING finger) family protein	>XP_001700051 predicted protein, partial [Chlamydomonas reinhardtii].
g1816.t1	863.998	503.693	1224.3	2.43065	1.28134	0.000151939	0.002905		>XP_001691455 predicted protein, partial [Chlamydomonas reinhardtii].
g3622.t1	18.7866	3.55041	34.0227	9.58276	3.26044	0.00015271	0.00291619		>XP_001703278 hypothetical protein CHLREDRAFT_168957 [Chlamydomonas reinhardtii].
Cre17.g724400.t1.2	38.4216	15.8324	61.0108	3.85353	1.94618	0.0001546	0.00294511		>XP_001697232 flagellar associated protein [Chlamydomonas reinhardtii].
Cre12.g485050.t1.2	863.771	504.262	1223.28	2.42588	1.27851	0.000156808	0.00297665	carbonic anhydrase 1	>XP_001703176 carbonic anhydrase 6 [Chlamydomonas reinhardtii].
Cre12.g489100.t1.3	32956.3	7146.89	58765.7	8.22256	3.03959	0.000157503	0.00298229	Ribosomal protein L31e family protein	>XP_001690923 ribosomal protein L31, component of cytosolic 80S ribosome and 60S large subunit [Chlamydomonas reinhardtii].
Cre01.g029250.t1.2	101.389	54.6777	148.099	2.70859	1.43754	0.000157334	0.00298229		>XP_001690034 aromatic amino acid hydroxylase-related protein [Chlamydomonas reinhardtii].
Cre10.g453450.t1.2	118.698	53.638	183.759	3.4259	1.77648	0.00015969	0.0030164	Small nuclear ribonucleoprotein family protein	>XP_001698348 small nuclear ribonucleoprotein Sm D2 [Chlamydomonas reinhardtii].
g11252.t2	5.50595	0	11.0119	Inf	Inf	0.000162566	0.00305532	stress-inducible protein, putative	>NP_001036957 Hsc70/Hsp90-organizing protein HOP [Bombyx mori].
Cre07.g353550.t1.2	1281.53	432.715	2130.34	4.92319	2.29959	0.00016236	0.00305532	Translation initiation factor SUI1 family protein	>XP_002951672 hypothetical protein VOLCADRAFT_105191 [Volvox carteri f. nagariensis].
g3669.t1	13.8735	3.36393	24.3831	7.2484	2.85766	0.000164253	0.00308033
Cre06.g279800.t1.2	258.932	108.655	409.208	3.76611	1.91307	0.000167698	0.0031388		>XP_001695307 predicted protein [Chlamydomonas reinhardtii].
Cre12.g559250.t1.2	19628.9	7066.41	32191.4	4.55555	2.18762	0.000168641	0.00314717	general regulatory factor 7	>XP_001702812 14-3-3 protein [Chlamydomonas reinhardtii].
g5102.t1	160.101	74.562	245.64	3.29444	1.72003	0.000168629	0.00314717	Protein kinase superfamily protein	>XP_001691755 predicted protein [Chlamydomonas reinhardtii].
Cre10.g423200.t1.3	34.9771	13.6685	56.2856	4.1179	2.04191	0.00017096	0.00318326	ACT-like protein tyrosine kinase family protein	>XP_002954880 hypothetical protein VOLCADRAFT_95692 [Volvox carteri f. nagariensis].
g9688.t1	473.844	274.872	672.815	2.44774	1.29145	0.000171408	0.00318783	glutamine-dependent asparagine synthase 1	>XP_001695073 predicted protein, partial [Chlamydomonas reinhardtii].
g7962.t1	5.36527	0	10.7305	Inf	Inf	0.000173525	0.00322336	SPT2 chromatin protein
Cre07.g335200.t1.1	1148.34	663.201	1633.47	2.46301	1.30042	0.000175618	0.00325453	elongation factor family protein	>XP_001700103 GTP binding protein TypA [Chlamydomonas reinhardtii].
Cre12.g514900.t1.2	1247.02	337.137	2156.9	6.39769	2.67755	0.000179745	0.00332709	Tim10/DDP family zinc finger protein	>XP_001703014 mitochondrial inner membrane translocase [Chlamydomonas reinhardtii].
Cre07.g321550.t1.2	99.4479	53.7747	145.121	2.69869	1.43226	0.000182632	0.00337654		>XP_001700854 hypothetical protein CHLREDRAFT_187531, partial [Chlamydomonas reinhardtii].
g17094.t2	12.0732	0.506765	23.6396	46.648	5.54374	0.000183104	0.00338127		>XP_001691567 hypothetical protein CHLREDRAFT_189056, partial [Chlamydomonas reinhardtii].
Cre01.g018150.t1.2	350.042	204.822	495.262	2.41801	1.27382	0.000184614	0.00340114		>XP_001689486 predicted protein [Chlamydomonas reinhardtii].
Cre03.g205900.t1.2	1087.19	619.536	1554.84	2.50969	1.32751	0.00019017	0.00349121	S-adenosylmethionine decarboxylase	>XP_001693327 S-adenosylmethionine decarboxylase [Chlamydomonas reinhardtii].
g14663.t1	11.2799	2.11429	20.4456	9.67019	3.27354	0.000191216	0.00350046		>XP_001702376 hypothetical protein CHLREDRAFT_194641 [Chlamydomonas reinhardtii].
Cre12.g511050.t1.2	85.6491	42.2018	129.096	3.05903	1.61307	0.000191344	0.00350046	DNAJ heat shock family protein	>XP_001690875 radial spoke protein 16 [Chlamydomonas reinhardtii].
g15192.t1	12.5009	3.6113	21.3905	5.92322	2.56638	0.000194785	0.00354663		>XP_001702255 hypothetical protein CHLREDRAFT_195325 [Chlamydomonas reinhardtii].
Cre06.g272950.t1.3	430.706	146.617	714.794	4.87525	2.28548	0.000194999	0.00354663	Ribosomal protein S13/S18 family	>XP_001696472 ribosomal protein S18, component of cytosolic 80S ribosome and 40S small subunit [Chlamydomonas reinhardtii].
Cre16.g665750.t1.2	25.4402	8.78125	42.0991	4.7942	2.26129	0.000194965	0.00354663	Pseudouridine synthase family protein	>XP_001701439 pseudouridine synthase-related protein [Chlamydomonas reinhardtii].
Cre06.g266950.t1.2	54.9553	28.2212	81.6894	2.89461	1.53337	0.000201778	0.00364456		>XP_001696259 hypothetical protein CHLREDRAFT_142188, partial [Chlamydomonas reinhardtii].
Cre01.g009050.t1.2	16.6113	5.77521	27.4474	4.75261	2.24872	0.000211682	0.0038127		>XP_001700265 predicted protein, partial [Chlamydomonas reinhardtii].
Cre16.g678100.t1.2	561.097	238.332	883.861	3.70853	1.89085	0.000216504	0.0038926	Vacuolar protein sorting-associated protein VPS28 family protein	>XP_001695966 subunit of the ESCRT-I complex [Chlamydomonas reinhardtii].
Cre02.g108650.t1.2	68.4929	35.7558	101.23	2.83114	1.50139	0.000219093	0.00393464	VH1-interacting kinase	>XP_001699721 hypothetical protein CHLREDRAFT_141759 [Chlamydomonas reinhardtii].
Cre16.g669900.t1.2	150.152	81.505	218.798	2.68448	1.42464	0.000219636	0.00393989		>XP_001699232 hypothetical protein CHLREDRAFT_185341 [Chlamydomonas reinhardtii].
g13954.t1	33.4281	10.6361	56.22	5.28575	2.40211	0.000225703	0.00403487		>XP_001693696 L-galactono-1,4-lactone dehydrogenase [Chlamydomonas reinhardtii].
Cre12.g559400.t1.3	22.8113	9.73313	35.8894	3.68734	1.88258	0.000225619	0.00403487		>XP_001702834 3',5'-cyclic-nucleotide phosphodiesterase, partial [Chlamydomonas reinhardtii].
Cre03.g207000.t1.2	705.486	213.534	1197.44	5.60772	2.48741	0.000229293	0.00408971	abscisic acid (aba)-deficient 4	>XP_001693319 predicted protein [Chlamydomonas reinhardtii].
g6066.t1	776.161	465.69	1086.63	2.33338	1.22242	0.000231815	0.0041253	beta-amylase 4	>XP_001696500 beta-amylase, partial [Chlamydomonas reinhardtii].
g18167.t1	7.79704	1.15039	14.4437	12.5555	3.65025	0.000241721	0.00429185		>XP_001698947 hypothetical protein CHLREDRAFT_177541 [Chlamydomonas reinhardtii].
Cre11.g482200.t1.2	8.9211	1.65715	16.1851	9.7668	3.28789	0.000242525	0.00430125		>XP_002954856 hypothetical protein VOLCADRAFT_82997 [Volvox carteri f. nagariensis].
Cre06.g287700.t1.3	98.0914	52.4123	143.771	2.74307	1.45579	0.000242984	0.00430452	ACT-like protein tyrosine kinase family protein	>XP_001695374 serine/threonine protein kinase 18 [Chlamydomonas reinhardtii].
Cre12.g541250.t1.2	195.789	106.002	285.576	2.69406	1.42978	0.000243554	0.00430975		>XP_001694067 nitrite transporter [Chlamydomonas reinhardtii].	formate-nitrite transporter (FNT) family.	2.A.44.2.1
Cre01.g030600.t1.3	139.256	81.0433	197.469	2.43659	1.28486	0.000249617	0.00440213	Protein kinase superfamily protein	>XP_001689585 mitogen activated protein kinase kinase kinase 4 [Chlamydomonas reinhardtii].
Cre16.g671900.t1.1	58.7657	26.3701	91.1612	3.45699	1.78952	0.000250991	0.00441642	peptidylprolyl cis/trans isomerase, NIMA-interacting 1	>XP_001695908 peptidyl-prolyl cis-trans isomerase, parvulin-type [Chlamydomonas reinhardtii].
Cre03.g179600.t1.2	201.162	125.246	277.078	2.21227	1.14553	0.000250961	0.00441642
Cre02.g113400.t1.2	1497.75	341.445	2654.05	7.77302	2.95847	0.000252229	0.00443324		>BAG12189 Parkin-co-regulated gene product [Chlamydomonas reinhardtii].
Cre14.g625100.t1.2	36.7629	15.3257	58.2001	3.79756	1.92507	0.00025624	0.00449366		>XP_001692819 predicted protein, partial [Chlamydomonas reinhardtii].
Cre02.g099000.t1.2	324.262	185.603	462.921	2.49414	1.31854	0.000262419	0.00458152	syntaxin of plants 71	>XP_001700030 Qc-SNARE protein, SYP7-family [Chlamydomonas reinhardtii].
Cre05.g239200.t1.2	108.89	58.7469	159.032	2.70708	1.43674	0.00026281	0.00458324		>XP_001697713 flagellar associated protein [Chlamydomonas reinhardtii].
Cre01.g053850.t1.2	22.1073	9.38651	34.8281	3.71044	1.89159	0.000263669	0.00459312	Transducin/WD40 repeat-like superfamily protein	>XP_001690267 predicted protein, partial [Chlamydomonas reinhardtii].
g2033.t1	213.497	124.576	302.418	2.42758	1.27952	0.000269292	0.00467031
Cre06.g299950.t1.3	47.053	24.4377	69.6683	2.85085	1.51139	0.000271998	0.00470683		>XP_001692881 predicted protein [Chlamydomonas reinhardtii].
Cre12.g499400.t1.2	301.871	130.598	473.144	3.62289	1.85714	0.00027585	0.00475773	Cyclophilin-like peptidyl-prolyl cis-trans isomerase family protein	>XP_001702337 peptidyl-prolyl cis-trans isomerase, cyclophilin-type [Chlamydomonas reinhardtii].
Cre03.g193150.t1.2	64.758	31.6002	97.9159	3.09859	1.63161	0.000275564	0.00475773		>XP_001693253 predicted protein [Chlamydomonas reinhardtii].
g6358.t1	73.3188	35.113	111.525	3.17617	1.66729	0.000276976	0.00477189		>XP_002946249 hypothetical protein VOLCADRAFT_86334 [Volvox carteri f. nagariensis].
Cre12.g528550.t1.1	443.748	124.423	763.073	6.13289	2.61657	0.000277582	0.00477709	3-oxo-5-alpha-steroid 4-dehydrogenase family protein	>XP_001696975 hypothetical protein CHLREDRAFT_120014 [Chlamydomonas reinhardtii].
Cre01.g002900.t1.2	23.054	9.00228	37.1056	4.1218	2.04327	0.000285961	0.00490514
Cre04.g213300.t1.2	86.352	12.2782	160.426	13.0659	3.70773	0.000292838	0.00500677
Cre02.g074720.t1.3	13.7201	3.71055	23.7297	6.39519	2.67699	0.000293164	0.00500677		>XP_001701628 guanylate cyclase [Chlamydomonas reinhardtii].
Cre03.g172800.t1.2	25.7352	11.367	40.1035	3.52806	1.81888	0.000295099	0.00502823	Zinc finger C-x8-C-x5-C-x3-H type family protein	>XP_002946964 CCCH-type zinc finger protein, partial [Volvox carteri f. nagariensis].
g14787.t1	35.0371	16.1407	53.9334	3.34145	1.74048	0.000296171	0.0050362		>XP_001698991 hypothetical protein CHLREDRAFT_193460 [Chlamydomonas reinhardtii].
g15384.t1	8.69559	1.36015	16.031	11.7862	3.55903	0.000296842	0.00504213
Cre08.g360200.t1.2	4.9199	0	9.83981	Inf	Inf	0.000300219	0.00509398	solute:sodium symporters;urea transmembrane transporters		solute:sodium symporter (SSS) family.	2.A.21.6.2
Cre07.g317150.t1.2	376.745	228.31	525.18	2.30029	1.20182	0.000302177	0.00512166		>XP_001700816 hypothetical protein CHLREDRAFT_93747 [Chlamydomonas reinhardtii].
g4847.t1	6.32208	0.346623	12.2975	35.4781	5.14886	0.000314862	0.0053309	TBP-associated factor 13	>XP_002951237 hypothetical protein VOLCADRAFT_91682 [Volvox carteri f. nagariensis].
Cre06.g283200.t1.2	83.3426	45.8182	120.867	2.63797	1.39943	0.000317084	0.00536272	SET domain-containing protein	>XP_001695337 predicted protein [Chlamydomonas reinhardtii].
Cre17.g708400.t1.2	66.9625	38.5189	95.4061	2.47686	1.30851	0.000318551	0.00538172		>XP_001691546 predicted protein [Chlamydomonas reinhardtii].
Cre16.g666150.t1.2	58.0888	27.5115	88.6661	3.22287	1.68835	0.000320428	0.00540761		>XP_001701436 flagellar outer dynein arm-docking complex protein 2 [Chlamydomonas reinhardtii].
g11655.t1	68.5314	34.9408	102.122	2.92271	1.54731	0.000321256	0.00541024		>XP_001701169 hypothetical protein CHLREDRAFT_153376 [Chlamydomonas reinhardtii].
Cre13.g580100.t1.2	238.871	78.3508	399.392	5.09748	2.34978	0.000323144	0.00543291
Cre12.g492900.t1.3	13.9473	3.87069	24.024	6.20663	2.63381	0.000327955	0.00550262	appr-1-p processing enzyme family protein	>XP_001700574 predicted protein, partial [Chlamydomonas reinhardtii].
Cre17.g699800.t1.3	21.6394	9.08951	34.1893	3.76141	1.91127	0.000329892	0.00552569		>XP_001691778 hypothetical protein CHLREDRAFT_189125 [Chlamydomonas reinhardtii].
Cre02.g075800.t1.2	121.229	69.953	172.506	2.46602	1.30218	0.000338493	0.00565164
Cre16.g661050.t1.2	34157.6	7169.69	61145.5	8.52834	3.09226	0.000340449	0.00567394	Ribosomal protein L34e superfamily protein	>XP_001697940 ribosomal protein L34, component of cytosolic 80S ribosome and 60S large subunit [Chlamydomonas reinhardtii].
Cre16.g670800.t1.2	655.526	272.246	1038.81	3.81569	1.93194	0.000340552	0.00567394	tubulin folding cofactor A (KIESEL)	>XP_001692118 hypothetical protein CHLREDRAFT_183374 [Chlamydomonas reinhardtii].
Cre03.g205100.t1.2	55.2135	26.7392	83.6877	3.12977	1.64606	0.000350649	0.00581129
g3267.t2	5.05998	0	10.12	Inf	Inf	0.000353192	0.00583493		>XP_001697501 predicted protein [Chlamydomonas reinhardtii].
Cre16.g686800.t1.2	85.6867	49.1175	122.256	2.48905	1.3156	0.000354518	0.00584452	phosphate transporter 1;6	>XP_001691948 proton/phosphate symporter, splice variant b [Chlamydomonas reinhardtii].	major facilitator superfamily (MFS).	2.A.1.9.4
Cre01.g031100.t1.2	2439.15	1528.31	3350	2.19197	1.13223	0.000360296	0.00591993	protein containing PDZ domain, a K-box domain, and a TPR region	>XP_001690058 predicted protein [Chlamydomonas reinhardtii].
g11581.t1	84.4185	49.4784	119.359	2.41234	1.27043	0.000363773	0.00596572		>XP_001698758 hypothetical protein CHLREDRAFT_151870, partial [Chlamydomonas reinhardtii].
Cre03.g190000.t1.2	175.454	105.522	245.385	2.32544	1.2175	0.000364633	0.00596734	Protein phosphatase 2C family protein	>XP_001692037 hypothetical protein CHLREDRAFT_94422, partial [Chlamydomonas reinhardtii].
Cre12.g548200.t1.3	156.78	89.7148	223.844	2.49507	1.31908	0.000372881	0.00608328	protease-related	>XP_002956349 hypothetical protein VOLCADRAFT_119365 [Volvox carteri f. nagariensis].
g11158.t1	51.1558	25.2039	77.1077	3.05936	1.61323	0.000374341	0.00610074	cytochrome c oxidase 19-1	>XP_001698539 cytochrome c oxidase assembly protein [Chlamydomonas reinhardtii].
g185.t1	543.163	201.787	884.538	4.38351	2.13209	0.000389039	0.00632713	Ubiquitin supergroup;Ribosomal protein L40e	>XP_001700313 ribosomal protein L40, component of cytosolic 80S ribosome and 60S large subunit [Chlamydomonas reinhardtii].
g3194.t1	6.19621	0.346623	12.0458	34.7519	5.11902	0.000390779	0.00634885		>XP_001694280 hypothetical protein CHLREDRAFT_191186, partial [Chlamydomonas reinhardtii].
Cre12.g533650.t1.2	969.853	279.738	1659.97	5.93401	2.56901	0.00039372	0.00637681	TRAM, LAG1 and CLN8 (TLC) lipid-sensing domain containing protein	>XP_001692903 predicted protein, partial [Chlamydomonas reinhardtii].
g7067.t1	7.47052	0.853388	14.0877	16.5079	4.04509	0.000399426	0.00646255
Cre16.g681200.t1.2	1433.47	430.843	2436.1	5.65426	2.49934	0.00040047	0.00647275		>XP_001692054 hypothetical protein CHLREDRAFT_189256 [Chlamydomonas reinhardtii].
Cre16.g682650.t1.3	753.615	282.115	1225.12	4.34261	2.11856	0.000406012	0.00654882		>XP_001692068 hypothetical protein CHLREDRAFT_189278 [Chlamydomonas reinhardtii].
g6412.t1	37.9312	15.5851	60.2772	3.86763	1.95145	0.000407464	0.00656549
Cre03.g181800.t1.2	10.6727	2.0534	19.292	9.39516	3.23192	0.000409666	0.00658742
Cre16.g652750.t1.2	173.383	105.222	241.543	2.29555	1.19884	0.00040954	0.00658742	Flavin-binding monooxygenase family protein	>XP_001698221 hypothetical protein CHLREDRAFT_193149 [Chlamydomonas reinhardtii].
g655.t1	946.462	616.382	1276.54	2.07102	1.05034	0.000410319	0.00659117
Cre15.g640550.t1.2	4.84308	0	9.68616	Inf	Inf	0.000415067	0.00663941		>XP_001701138 hypothetical protein CHLREDRAFT_179195 [Chlamydomonas reinhardtii].
Cre17.g699700.t1.3	94.3297	54.3281	134.331	2.4726	1.30603	0.00041544	0.00663941		>XP_001691779 predicted protein [Chlamydomonas reinhardtii].
Cre01.g050550.t1.2	4385.83	1662.04	7109.61	4.27763	2.09681	0.000415971	0.00664113	2 iron, 2 sulfur cluster binding	>XP_001690246 predicted protein [Chlamydomonas reinhardtii].
Cre11.g468450.t1.2	2768.33	1673.35	3863.31	2.30873	1.2071	0.000419224	0.00666803	centrin2	>XP_001699499 centrin [Chlamydomonas reinhardtii].	nuclear pore complex (NPC) family.	9.A.14.1.1
Cre02.g085800.t1.3	20.786	7.4211	34.1508	4.60186	2.20222	0.000421594	0.00669681		>XP_002949414 guanylyl and adenylyl cyclase family member, partial [Volvox carteri f. nagariensis].
Cre06.g301100.t1.3	362.493	230.382	494.605	2.14689	1.10225	0.000422322	0.00670158		>XP_001691429 predicted protein, partial [Chlamydomonas reinhardtii].
Cre06.g256450.t1.2	27.892	11.2918	44.4922	3.94022	1.97828	0.000442978	0.0069729		>XP_001696622 flagellar associated protein, partial [Chlamydomonas reinhardtii].
Cre06.g289700.t1.2	283.762	168.388	399.135	2.37033	1.24509	0.00044451	0.00698999	SNARE-like superfamily protein	>XP_001695519 component of TRAPP complex [Chlamydomonas reinhardtii].
g4634.t1	9.70075	2.00377	17.3977	8.68248	3.11811	0.000450807	0.00708191		>XP_001702330 hypothetical protein CHLREDRAFT_186151 [Chlamydomonas reinhardtii].
Cre14.g618050.t1.2	43.3181	19.8633	66.7729	3.36163	1.74916	0.000451788	0.00709022	Plastid-lipid associated protein PAP / fibrillin family protein	>XP_001689833 plastid lipid associated protein [Chlamydomonas reinhardtii].
Cre16.g685150.t1.2	191.769	115.034	268.503	2.33411	1.22287	0.00045455	0.00712643		>XP_001692089 hypothetical protein CHLREDRAFT_183348 [Chlamydomonas reinhardtii].
g17010.t1	27222.3	8698.1	45746.6	5.25938	2.39489	0.000456996	0.00715047	Ribosomal L27e protein family	>XP_001691762 ribosomal protein L27, component of cytosolic 80S ribosome and 60S large subunit [Chlamydomonas reinhardtii].
g8473.t1	6.20222	0.803762	11.6007	14.433	3.8513	0.000462639	0.00723156
g11678.t1	64.8427	19.1662	110.519	5.76635	2.52766	0.000470819	0.00735096		>XP_001699514 predicted protein [Chlamydomonas reinhardtii].
Cre10.g421450.t1.3	100.762	52.4468	149.077	2.84243	1.50713	0.000471684	0.00735096		>XP_001702602 predicted protein [Chlamydomonas reinhardtii].
Cre14.g630700.t1.2	33.7957	17.3024	50.2891	2.90649	1.53928	0.000472494	0.00735606		>XP_001692775 predicted protein, partial [Chlamydomonas reinhardtii].
Cre10.g427400.t1.2	252.223	131.971	372.476	2.82242	1.49693	0.00047295	0.00735606		>XP_001701726 predicted protein [Chlamydomonas reinhardtii].
Cre13.g573500.t1.2	61.2097	30.4761	91.9432	3.01689	1.59306	0.000475826	0.00739347		>XP_001693500 flagellar associated protein [Chlamydomonas reinhardtii].
Cre17.g709800.t1.2	164.243	96.5035	231.982	2.40387	1.26536	0.00048029	0.00745543		>XP_001691533 RegA/RlsA-like protein [Chlamydomonas reinhardtii].
Cre01.g009350.t1.2	38.3537	16.5753	60.1322	3.62782	1.8591	0.000486278	0.00754092	porphyromonas-type peptidyl-arginine deiminase family protein	>XP_001700262 agmatine iminohydrolase [Chlamydomonas reinhardtii].
Cre10.g426500.t1.2	1185.58	748.979	1622.18	2.16585	1.11493	0.000492649	0.00762463		>XP_001702725 predicted protein, partial [Chlamydomonas reinhardtii].
g9779.t1	104.896	62.0574	147.735	2.38061	1.25133	0.00049865	0.00769472	Chlorophyll A-B binding family protein	>XP_001694681 early light-inducible protein [Chlamydomonas reinhardtii].
g5161.t1	135.694	78.359	193.028	2.46338	1.30064	0.000501908	0.00772978	zinc finger protein-related	>XP_002950146 hypothetical protein VOLCADRAFT_60154 [Volvox carteri f. nagariensis].
g9903.t1	146.697	30.8302	262.564	8.51645	3.09025	0.000504054	0.0077552		>XP_001694719 predicted protein [Chlamydomonas reinhardtii].
Cre10.g417650.t1.3	24.0604	9.07825	39.0425	4.30066	2.10456	0.000504628	0.00775642	AGAMOUS-like 26	>XP_002948252 hypothetical protein VOLCADRAFT_45595, partial [Volvox carteri f. nagariensis].
Cre08.g382500.t1.2	17100.5	4381.92	29819	6.80501	2.7666	0.000512423	0.00783577	Ribosomal protein S25 family protein	>XP_001694225 ribosomal protein S25, component of cytosolic 80S ribosome and 40S small subunit [Chlamydomonas reinhardtii].
Cre10.g444400.t1.3	112.041	65.5876	158.494	2.41652	1.27293	0.000512769	0.00783577		>XP_001690327 hypothetical protein CHLREDRAFT_188323 [Chlamydomonas reinhardtii].
g276.t1	408.871	169.089	648.653	3.83616	1.93966	0.000529283	0.00804859	Ribosomal protein L6 family protein	>XP_001689873 ribosomal protein L6, component of cytosolic 80S ribosome and 60S large subunit [Chlamydomonas reinhardtii].
Cre06.g255900.t1.2	13.6676	5.08197	22.2532	4.37886	2.13056	0.000539604	0.00819758
Cre10.g439700.t1.2	270.896	167.548	374.244	2.23365	1.1594	0.000540505	0.00820333	CTC-interacting domain 11	>XP_001690547 RNA binding protein [Chlamydomonas reinhardtii].
Cre17.g704050.t1.3	29.739	12.6023	46.8756	3.7196	1.89515	0.000544376	0.00825408		>XP_001691578 predicted protein [Chlamydomonas reinhardtii].
Cre03.g207250.t1.2	1160.73	719.978	1601.48	2.22435	1.15338	0.000548927	0.00829901	glutamine synthetase 2	>XP_001693317 glutamine synthetase [Chlamydomonas reinhardtii].
g15525.t1	11.5827	2.40002	20.7655	8.65219	3.11307	0.000559793	0.00844701		>XP_001700717 ubiquitin-like protein [Chlamydomonas reinhardtii].
g567.t1	12.5921	3.82107	21.3631	5.59088	2.48308	0.000562271	0.0084681		>XP_001689542 predicted protein, partial [Chlamydomonas reinhardtii].
g3930.t1	1992.89	931.961	3053.81	3.27676	1.71227	0.000569722	0.00855616	cyclophilin 38	>XP_001692034 peptidyl-prolyl cis-trans isomerase, cyclophilin-type [Chlamydomonas reinhardtii].
Cre14.g627300.t1.3	85.0651	48.8762	121.254	2.48084	1.31083	0.000574078	0.00861282		>XP_001692802 predicted protein [Chlamydomonas reinhardtii].
Cre03.g203450.t1.2	23428.3	3751.33	43105.2	11.4906	3.52239	0.000579201	0.00865532	Ribosomal protein S21e	>XP_001693346 ribosomal protein S21, component of cytosolic 80S ribosome and 40S small subunit [Chlamydomonas reinhardtii].
Cre12.g551451.t1.1	5342.13	3527.45	7156.82	2.0289	1.0207	0.000579997	0.00865532		>XP_001694010 predicted protein [Chlamydomonas reinhardtii].
Cre03.g196550.t1.2	1258.97	370.002	2147.94	5.80522	2.53735	0.000593564	0.0088375		>XP_001693291 predicted protein [Chlamydomonas reinhardtii].
Cre13.g571700.t1.3	649.919	409.236	890.602	2.17626	1.12185	0.000596199	0.00886832	calmodulin-domain protein kinase cdpk isoform 2	>XP_001693482 predicted protein [Chlamydomonas reinhardtii].
g1883.t1	12.6447	2.11429	23.1752	10.9612	3.45434	0.000597673	0.00887341	inhibitor-3	>XP_001701222 flagellar associated protein [Chlamydomonas reinhardtii].
Cre07.g344172.t1.2	8.75691	1.5203	15.9935	10.52	3.39506	0.000606646	0.00896506
g429.t1	10.3837	2.37368	18.3937	7.74903	2.95401	0.000606706	0.00896506		>XP_001689935 predicted protein [Chlamydomonas reinhardtii].
Cre10.g456200.t1.2	48128.2	9251.05	87005.3	9.40491	3.23341	0.000608668	0.00898558	Ribosomal protein S24e family protein	>XP_001698368 ribosomal protein S24, component of cytosolic 80S ribosome and 40S small subunit [Chlamydomonas reinhardtii].
Cre17.g702900.t1.2	31590	12009	51170.9	4.26105	2.09121	0.000623588	0.00919719		>XP_001691606 predicted protein [Chlamydomonas reinhardtii].
Cre05.g243450.t1.3	17.5714	3.92032	31.2224	7.96426	2.99354	0.000634268	0.00934591	glyoxal oxidase-related protein	>XP_002957759 hypothetical protein VOLCADRAFT_98850 [Volvox carteri f. nagariensis].
Cre04.g224750.t1.2	740.379	313.635	1167.12	3.72127	1.89579	0.000647319	0.00951141	vesicle-associated membrane protein 727	>XP_001692208 R-SNARE protein, VAMP72-family [Chlamydomonas reinhardtii].
Cre11.g469000.t1.2	109.207	63.3718	155.042	2.44655	1.29075	0.000647318	0.00951141		>XP_001699505 flagellar associated protein [Chlamydomonas reinhardtii].
Cre01.g047950.t1.1	126.223	68.4726	183.974	2.68682	1.4259	0.000653751	0.00958794	RAB GTPase homolog A4D	>2YC2_C Chain C, Intraflagellar Transport Complex 25-27 From Chlamydomonas.
Cre03.g198100.t1.2	408.651	68.883	748.419	10.8651	3.44163	0.000667917	0.00976828	BET1P/SFT1P-like protein 14A	>XP_001693301 Qc-SNARE protein, Bet1/mBET1 family [Chlamydomonas reinhardtii].
Cre02.g104700.t1.2	517.789	255.416	780.163	3.05448	1.61093	0.000667718	0.00976828	squamosa promoter-binding protein-like 12	>XP_001699986 squamosa promoter binding protein [Chlamydomonas reinhardtii].
Cre17.g698800.t1.2	62.3021	31.1551	93.4491	2.99948	1.58471	0.000684854	0.00998804	Pex2/Pex12 N-terminal domain-containing protein / zinc finger (C3HC4-type RING finger) family protein	>XP_002949597 hypothetical protein VOLCADRAFT_104358 [Volvox carteri f. nagariensis].	peroxisomal protein importer (PPI) family.	3.A.20.1.1
Cre13.g567327.t1.2	42.9429	22.0385	63.8474	2.89709	1.5346	0.000685941	0.00999459		>XP_002957804 hypothetical protein VOLCADRAFT_98943 [Volvox carteri f. nagariensis].
Cre06.g307700.t1.3	14.1533	4.65117	23.6554	5.0859	2.3465	0.000695589	0.010107		>XP_001691368 predicted protein, partial [Chlamydomonas reinhardtii].
Cre14.g613100.t1.3	38.783	18.4768	59.0893	3.19803	1.67718	0.0007001	0.0101631		>XP_001699036 hypothetical protein CHLREDRAFT_152079 [Chlamydomonas reinhardtii].
g4327.t2	12.6296	1.31053	23.9487	18.2741	4.19173	0.000703302	0.0102002	calcium-dependent protein kinase 34	>XP_001693375 calcium-binding protein [Chlamydomonas reinhardtii].
Cre10.g441750.t1.2	221.522	139.268	303.776	2.18124	1.12515	0.000706735	0.0102405	Aluminium induced protein with YGL and LRDR motifs	>XP_001690347 asparagine synthetase-related protein [Chlamydomonas reinhardtii].
Cre10.g432850.t1.2	65.3865	36.1227	94.6504	2.62025	1.3897	0.000712428	0.0103134		>XP_001702484 flagellar associated protein [Chlamydomonas reinhardtii].
Cre12.g519500.t1.2	2383.55	658.484	4108.62	6.23952	2.64144	0.000723241	0.0104603	cation exchanger 2	>CAR92574 cation exchanger 1 [Chlamydomonas reinhardtii].	Ca2+:cation antiporter (CaCA) family.	2.A.19.2.6
Cre13.g562000.t1.3	58.277	33.0062	83.5478	2.53128	1.33987	0.000727989	0.0105193		>XP_001693396 predicted protein, partial [Chlamydomonas reinhardtii].
g15041.t1	494.829	313.186	676.472	2.15997	1.11101	0.000729621	0.0105331	chloroplastic drought-induced stress protein of 32 kD	>XP_001692826 plastidic thioredoxin-like protein [Chlamydomonas reinhardtii].
g15486.t1	8.08684	1.49701	14.6767	9.80401	3.29337	0.000732051	0.0105585
g15977.t1	2584.23	1633.43	3535.03	2.16418	1.11382	0.00073522	0.0105945
Cre14.g615400.t1.2	11.9688	3.52407	20.4135	5.7926	2.53421	0.000737429	0.0105994		>XP_001699005 hypothetical protein CHLREDRAFT_81856 [Chlamydomonas reinhardtii].
Cre02.g080600.t1.2	10.3789	3.26467	17.4931	5.35831	2.42178	0.000736346	0.0105994	Heat shock protein 70 (Hsp 70) family protein	>XP_001701884 binding protein 2 [Chlamydomonas reinhardtii].	cation channel-forming heat shock protein-70 (Hsp70) family.	1.A.33.1.1
g18134.t1	79.3602	46.8197	111.901	2.39003	1.25703	0.000737587	0.0105994	Protein kinase superfamily protein	>XP_001703627 predicted protein, partial [Chlamydomonas reinhardtii].
g2068.t1	1898.09	816.82	2979.36	3.64751	1.86691	0.000742241	0.0106467	Ribosomal protein L1p/L10e family	>XP_001699807 ribosomal protein L10a, component of cytosolic 80S ribosome and 60S large subunit [Chlamydomonas reinhardtii].
Cre03.g159581.t1.2	5.7184	0	11.4368	Inf	Inf	0.000745126	0.0106601		>XP_001697501 predicted protein [Chlamydomonas reinhardtii].
Cre13.g589800.t1.2	82.7337	48.7506	116.717	2.39416	1.25952	0.000751995	0.0107327	Na+/H+ antiporter 6	>XP_001691971 hypothetical protein CHLREDRAFT_170866, partial [Chlamydomonas reinhardtii].	monovalent cation:proton antiporter-1 (CPA1) family.	2.A.36.1.5
Cre13.g570850.t1.2	1339.58	832.488	1846.67	2.21826	1.14943	0.000752345	0.0107327		>XP_001693473 predicted protein [Chlamydomonas reinhardtii].
g5745.t1	17.0084	5.74066	28.276	4.92557	2.30029	0.000765086	0.0108947
Cre16.g670650.t1.2	8.99067	2.16392	15.8174	7.30964	2.8698	0.000767103	0.0109135
Cre07.g354850.t1.2	28.1315	12.4422	43.8209	3.52196	1.81638	0.000769823	0.0109224		>XP_002951768 hypothetical protein VOLCADRAFT_92248 [Volvox carteri f. nagariensis].
Cre02.g076400.t1.2	32.77	15.2001	50.34	3.31182	1.72762	0.000775668	0.0109954	E2F/DP family winged-helix DNA-binding domain	>XP_001701847 subunit of ESCRT-II complex [Chlamydomonas reinhardtii].
Cre16.g661500.t1.2	93.8273	55.7987	131.856	2.36306	1.24066	0.000791499	0.0111895		>XP_001697870 hypothetical protein CHLREDRAFT_193088 [Chlamydomonas reinhardtii].
g9776.t1	537.838	163.428	912.248	5.58196	2.48077	0.000793612	0.0111993		>XP_001694761 Tctex2-related light chain [Chlamydomonas reinhardtii].
Cre09.g409150.t1.2	251.236	137.599	364.873	2.65172	1.40693	0.000815943	0.0114833		>XP_001696682 ubiquinol:cytochrome c oxidoreductase 10 kDa subunit [Chlamydomonas reinhardtii].
Cre12.g546500.t1.2	200.77	119.323	282.217	2.36515	1.24193	0.000822582	0.011525	Cytochrome b561/ferric reductase transmembrane with DOMON related domain	>XP_001694099 predicted protein [Chlamydomonas reinhardtii].
Cre02.g078550.t1.2	57.1737	27.8934	86.454	3.09944	1.63201	0.000832612	0.0116394		>XP_001701659 flagellar associated protein [Chlamydomonas reinhardtii].
Cre12.g558000.t1.1	336.563	209.662	463.463	2.21052	1.14439	0.000832976	0.0116394	Translation elongation factor EF1B/ribosomal protein S6 family protein	>XP_001702823 mitochondrial ribosomal protein S6 [Chlamydomonas reinhardtii].
g16799.t1	46.394	25.4776	67.3104	2.64195	1.4016	0.000835704	0.0116671		>XP_001691201 hypothetical protein CHLREDRAFT_183118 [Chlamydomonas reinhardtii].
Cre17.g704900.t1.2	41.2172	21.543	60.8915	2.82652	1.49903	0.000837497	0.0116817		>XP_001691571 predicted protein [Chlamydomonas reinhardtii].
Cre07.g332150.t1.2	197.823	94.72	300.925	3.177	1.66766	0.000838889	0.0116908	complex 1 family protein / LVR family protein	>XP_001690610 hypothetical protein CHLREDRAFT_188466 [Chlamydomonas reinhardtii].
g7567.t1	464.563	212.242	716.884	3.37767	1.75603	0.00083986	0.0116939
Cre02.g073150.t1.2	9.06603	2.00377	16.1283	8.04896	3.0088	0.000846474	0.0117651		>XP_001701614 predicted protein [Chlamydomonas reinhardtii].
Cre03.g159078.t1.2	8.98047	1.70678	16.2542	9.52331	3.25146	0.000849114	0.0117809		>XP_001697435 predicted protein [Chlamydomonas reinhardtii].
Cre12.g512050.t1.2	10.2038	2.80754	17.6001	6.26889	2.64821	0.00085112	0.0117983		>XP_001691073 predicted protein [Chlamydomonas reinhardtii].
g15805.t1	527.572	224.655	830.488	3.69672	1.88625	0.000856485	0.0118622	Ribosomal protein L33 family protein	>XP_001698141 mitochondrial ribosomal protein L33 [Chlamydomonas reinhardtii].
Cre01.g012500.t1.2	1575.64	675.095	2476.18	3.6679	1.87495	0.000867127	0.0119673	prenylated RAB acceptor 1.B5	>XP_001689882 prenylated rab acceptor family protein, partial [Chlamydomonas reinhardtii].
Cre13.g568850.t1.2	301.563	176.07	427.055	2.42548	1.27827	0.000870872	0.0120084	SufE/NifU family protein	>XP_001693712 iron-sulfur cluster assembly scaffold protein [Chlamydomonas reinhardtii].
g18380.t1	144.393	91.6966	197.09	2.14937	1.10392	0.000883607	0.0121733	centrin2	>XP_001703666 predicted protein, partial [Chlamydomonas reinhardtii].
Cre16.g672650.t1.2	3783.83	2417.74	5149.91	2.13005	1.09089	0.000887067	0.0122102	Mitochondrial substrate carrier family protein	>XP_001695808 mitochondrial substrate carrier protein [Chlamydomonas reinhardtii].	mitochondrial carrier (MC) family.	2.A.29.2.6
g6394.t1	34.373	17.3377	51.4084	2.96513	1.5681	0.000905145	0.0124282		>XP_001697978 hypothetical protein CHLREDRAFT_176755 [Chlamydomonas reinhardtii].
Cre09.g389950.t1.2	355.883	223.624	488.141	2.18286	1.12622	0.000906074	0.0124282	O-acetyltransferase family protein	>XP_001694445 O-acetyltransferase-related protein [Chlamydomonas reinhardtii].
Cre15.g634750.t1.3	87.817	50.3589	125.275	2.48765	1.31478	0.000914548	0.0125116	Protein of unknown function (DUF506)	>XP_002958433 hypothetical protein VOLCADRAFT_99686 [Volvox carteri f. nagariensis].
Cre03.g178500.t1.2	7.95355	2.41129	13.4958	5.59693	2.48464	0.000934593	0.0127524		>XP_001703258 coiled-coil protein associated with protofilament ribbons [Chlamydomonas reinhardtii].
Cre17.g701850.t1.3	4.19867	0	8.39734	Inf	Inf	0.000939022	0.0128017		>XP_001703738 predicted protein [Chlamydomonas reinhardtii].
g8761.t1	10.6009	3.45116	17.7506	5.14337	2.36271	0.0009509	0.0129411		>XP_001699031 hypothetical protein CHLREDRAFT_193444, partial [Chlamydomonas reinhardtii].
Cre02.g081550.t1.2	63.1434	32.946	93.3408	2.83314	1.5024	0.000960656	0.0130513	P-loop containing nucleoside triphosphate hydrolases superfamily protein	>XP_001701693 predicted protein [Chlamydomonas reinhardtii].
g16004.t1	272.722	105.867	439.577	4.15215	2.05386	0.000961924	0.0130572	NagB/RpiA/CoA transferase-like superfamily protein	>XP_001697882 eukaryotic initiation factor, partial [Chlamydomonas reinhardtii].
Cre09.g396550.t1.2	834.335	550.447	1118.22	2.03148	1.02253	0.000962968	0.0130601
g203.t1	152.291	28.4166	276.165	9.71842	3.28072	0.000971063	0.0131585	MATE efflux family protein	>XP_001700306 predicted protein [Chlamydomonas reinhardtii].
Cre10.g444600.t1.3	47.9102	26.4039	69.4165	2.62903	1.39453	0.000985157	0.0133034		>XP_002952653 hypothetical protein VOLCADRAFT_93413 [Volvox carteri f. nagariensis].
Cre13.g571300.t1.2	155.696	95.4312	215.961	2.263	1.17824	0.000987406	0.0133223		>XP_001693475 predicted protein [Chlamydomonas reinhardtii].
Cre07.g320750.t1.3	103.638	60.8612	146.415	2.40572	1.26647	0.000994735	0.0134097		>XP_001700847 guanylate cyclase [Chlamydomonas reinhardtii].
g6376.t1	47.2922	25.8099	68.7746	2.66466	1.41395	0.000997429	0.0134344		>XP_002945928 hypothetical protein VOLCADRAFT_86404 [Volvox carteri f. nagariensis].
Cre13.g564766.t1.2	4.19928	0	8.39856	Inf	Inf	0.000998884	0.0134412		>XP_002950511 3'5'-cyclic nucleotide phosphodiesterase [Volvox carteri f. nagariensis].
Cre06.g290000.t1.1	30.7723	13.779	47.7655	3.46653	1.79349	0.0010042	0.0134793	ureidoglycine aminohydrolase	>XP_001695522 glyoxylate induced protein [Chlamydomonas reinhardtii].
Cre03.g153000.t1.1	57.297	31.8678	82.7262	2.59592	1.37625	0.00101024	0.0135488		>XP_001697560 predicted protein [Chlamydomonas reinhardtii].
Cre07.g340600.t1.1	352.245	227.334	477.156	2.09892	1.06965	0.00101802	0.0136414	Mitochondrial substrate carrier family protein	>XP_002951722 hypothetical protein VOLCADRAFT_105233 [Volvox carteri f. nagariensis].
Cre07.g329900.t1.3	75.7984	43.6807	107.916	2.47057	1.30484	0.00102434	0.0137139	CHASE domain containing histidine kinase protein	>XP_002952599 hypothetical protein VOLCADRAFT_93268 [Volvox carteri f. nagariensis].
Cre02.g077800.t1.2	2386.77	1565.33	3208.2	2.04953	1.03529	0.00102517	0.0137139		>XP_001701858 predicted protein [Chlamydomonas reinhardtii].
g16078.t1	39.9966	21.246	58.7473	2.7651	1.46733	0.00104174	0.0139118	UDP-N-acetylglucosamine (UAA) transporter family	>XP_001701435 predicted protein, partial [Chlamydomonas reinhardtii].
Cre07.g343050.t1.2	10.8095	3.3143	18.3047	5.52293	2.46543	0.00105297	0.0140498		>XP_001692419 predicted protein [Chlamydomonas reinhardtii].
g2922.t1	812.078	535.65	1088.51	2.03212	1.02299	0.00107069	0.0142619		>XP_001695732 hypothetical protein CHLREDRAFT_192012, partial [Chlamydomonas reinhardtii].
Cre03.g202400.t1.2	498.897	326.795	670.998	2.05327	1.03792	0.00109438	0.0145159	adenine nucleotide transporter 1	>XP_001693350 mitochondrial carrier protein [Chlamydomonas reinhardtii].	mitochondrial carrier (MC) family.	2.A.29.23.4
Cre08.g360550.t1.3	6.68521	1.15039	12.22	10.6226	3.40906	0.00109713	0.01454		>XP_001702327 ERD4-related membrane protein [Chlamydomonas reinhardtii].
Cre03.g200000.t1.2	221.108	84.6989	357.518	4.22104	2.0776	0.0010987	0.0145484	calcium-dependent protein kinase 34	>XP_001693375 calcium-binding protein [Chlamydomonas reinhardtii].
g18237.t1	17.2074	6.08423	28.3305	4.65639	2.21921	0.0011178	0.0147641		>XP_001700477 predicted protein, partial [Chlamydomonas reinhardtii].
g16118.t1	24.9031	10.3279	39.4783	3.82249	1.93451	0.00112057	0.0147753		>XP_001699277 hypothetical protein CHLREDRAFT_177988 [Chlamydomonas reinhardtii].
g11929.t1	103.648	61.8687	145.428	2.35059	1.23302	0.00112325	0.0147862		>XP_002957116 hypothetical protein VOLCADRAFT_98189 [Volvox carteri f. nagariensis].
g18166.t1	7.67286	1.5203	13.8254	9.09391	3.1849	0.00112539	0.0148019		>XP_001698947 hypothetical protein CHLREDRAFT_177541 [Chlamydomonas reinhardtii].
Cre06.g274550.t1.3	195.935	124.991	266.88	2.1352	1.09437	0.00113873	0.0149523	protein kinase family protein / protein phosphatase 2C ( PP2C) family protein	>XP_002946205 hypothetical protein VOLCADRAFT_86237 [Volvox carteri f. nagariensis].
Cre16.g691600.t1.1	178.861	108.66	249.062	2.29212	1.19668	0.00114545	0.015028		>XP_001699343 hypothetical protein CHLREDRAFT_205585 [Chlamydomonas reinhardtii].
Cre02.g107500.t1.2	34.8853	19.146	50.6245	2.64413	1.4028	0.00114712	0.0150373		>XP_001699960 hypothetical protein CHLREDRAFT_186829 [Chlamydomonas reinhardtii].
Cre01.g014450.t1.3	14.4312	5.47822	23.3841	4.26857	2.09375	0.00115127	0.0150664		>XP_001689456 predicted protein [Chlamydomonas reinhardtii].
Cre04.g229536.t1.2	42.8557	13.8632	71.8481	5.18264	2.37369	0.0011525	0.01507
Cre16.g659350.t1.2	1077.44	629.663	1525.21	2.42227	1.27636	0.00116196	0.0151802	cytochrome B5 isoform D	>XP_001697920 cytochrome b5 protein [Chlamydomonas reinhardtii].
Cre17.g732150.t1.2	40.5421	19.0626	62.0216	3.25358	1.70203	0.00117317	0.0152765		>XP_001701530 flagellar associated protein [Chlamydomonas reinhardtii].
Cre07.g324600.t1.2	858.158	250.943	1465.37	5.83946	2.54584	0.00119065	0.0154656	SNARE-like superfamily protein	>XP_001700885 Sigma2-Adaptin [Chlamydomonas reinhardtii].
Cre04.g219450.t1.2	48.077	24.6513	71.5027	2.90057	1.53633	0.00120693	0.0156253		>XP_001692162 DnaJ-like protein, partial [Chlamydomonas reinhardtii].
Cre12.g518400.t1.2	49.5484	18.5873	80.5095	4.33143	2.11484	0.00121936	0.0157473		>XP_001697075 hypothetical protein CHLREDRAFT_158973 [Chlamydomonas reinhardtii].
Cre14.g617900.t1.2	37522.8	6806.45	68239.2	10.0257	3.32563	0.00122245	0.0157741	Ribosomal L29 family protein	>XP_001689832 ribosomal protein L35, component of cytosolic 80S ribosome and 60S large subunit [Chlamydomonas reinhardtii].
g7958.t1	6.53426	0.693246	12.3753	17.8512	4.15795	0.00122595	0.0157933
g7526.t1	204.591	124.217	284.965	2.2941	1.19793	0.00122574	0.0157933	Ribosomal protein L24e family protein	>XP_001702873 predicted protein [Chlamydomonas reinhardtii].
Cre12.g538050.t1.2	73.518	40.6288	106.407	2.61901	1.38902	0.00123834	0.0159007		>XP_001692861 predicted protein, partial [Chlamydomonas reinhardtii].
Cre10.g439850.t1.2	2278.91	1476.23	3081.6	2.08748	1.06176	0.00123684	0.0159007	transmembrane nine 7	>XP_001690544 EMP/nonaspanin domain family protein [Chlamydomonas reinhardtii].	The Endomembrane protein-70 (EMP70) Family	9.A.2.1.2
Cre06.g289050.t1.2	108.66	66.3771	150.942	2.27402	1.18524	0.00124489	0.0159717		>XP_001702257 hypothetical protein CHLREDRAFT_181280 [Chlamydomonas reinhardtii].
g5487.t1	71.3549	40.3694	102.34	2.5351	1.34204	0.00126229	0.0161552		>XP_001697783 flagellar associated protein [Chlamydomonas reinhardtii].
Cre06.g284100.t1.2	14.3872	5.02108	23.7533	4.73073	2.24206	0.00126745	0.0162081	ammonium transporter 1;3	>XP_001695464 Rh protein, CO2-responsive [Chlamydomonas reinhardtii].	ammonia transporter channel (Amt) family.	1.A.11.4.2
Cre16.g690100.t1.2	5.72864	0	11.4573	Inf	Inf	0.00127691	0.0163158		>XP_001699245 flagellar associated protein [Chlamydomonas reinhardtii].
Cre06.g306000.t1.3	63.1518	35.0746	91.2289	2.60099	1.37906	0.00127967	0.0163376	glyoxal oxidase-related protein	>XP_001691237 glyoxal or galactose oxidase [Chlamydomonas reinhardtii].
g16797.t1	54.7434	30.8543	78.6325	2.54851	1.34966	0.00129318	0.01647		>XP_001698927 hypothetical protein CHLREDRAFT_193398 [Chlamydomonas reinhardtii].
g12224.t1	14.1529	4.56394	23.7419	5.20206	2.37908	0.0012977	0.0165141
g14586.t1	4.7414	0	9.4828	Inf	Inf	0.0013036	0.0165623	metallopeptidase M24 family protein	>XP_001699126 hypothetical protein CHLREDRAFT_139416 [Chlamydomonas reinhardtii].
Cre16.g680950.t1.3	82.4005	49.1589	115.642	2.35242	1.23414	0.00131271	0.0166646		>XP_001692052 hypothetical protein CHLREDRAFT_183318 [Chlamydomonas reinhardtii].
g681.t1	8.75	1.84363	15.6564	8.49214	3.08613	0.00131752	0.0167121		>XP_001689580 predicted protein, partial [Chlamydomonas reinhardtii].
Cre03.g187200.t1.2	740.746	262.531	1218.96	4.64312	2.21509	0.00131927	0.0167207	Dynein light chain type 1 family protein	>XP_001692012 flagellar outer dynein arm light chain 6 [Chlamydomonas reinhardtii].
Cre14.g628450.t1.1	219.911	90.8764	348.945	3.83978	1.94102	0.00132278	0.016745	peptidyl-prolyl cis-trans isomerases	>XP_001692793 peptidyl-prolyl cis-transisomerase, cyclophilin type [Chlamydomonas reinhardtii].
Cre06.g267650.t1.2	157.756	93.6795	221.833	2.368	1.24367	0.0013319	0.0168263	calcium-dependent protein kinase 16	>XP_001696528 hypothetical protein CHLREDRAFT_167172 [Chlamydomonas reinhardtii].
g4996.t1	250.934	156.945	344.924	2.19773	1.13602	0.0013396	0.0169101	2-oxoacid dehydrogenases acyltransferase family protein	>XP_003529559 PREDICTED: lipoamide acyltransferase component of branched-chain alpha-keto acid dehydrogenase complex, mitochondrial-like [Glycine max].
Cre06.g299000.t1.2	206.154	101.988	310.321	3.04273	1.60536	0.00134428	0.0169282	Ribosomal protein L21	>XP_001691294 plastid ribosomal protein L21 [Chlamydomonas reinhardtii].
Cre17.g726650.t1.2	153.623	95.6816	211.565	2.21113	1.14478	0.00134763	0.0169568		>XP_001697259 hypothetical protein CHLREDRAFT_192516 [Chlamydomonas reinhardtii].
Cre06.g249700.t1.3	9.38333	1.89326	16.8734	8.91237	3.15581	0.00135443	0.0170014		>XP_001696436 cleavage and polyadenylation factor 6-related protein [Chlamydomonas reinhardtii].
g4617.t1	6.13366	0	12.2673	Inf	Inf	0.00136537	0.0171113		>XP_001691486 hypothetical protein CHLREDRAFT_180873 [Chlamydomonas reinhardtii].
g17858.t1	824.826	237.253	1412.4	5.95315	2.57365	0.00138602	0.0173563	60S acidic ribosomal protein family	>XP_001699629 acidic ribosomal protein P1 [Chlamydomonas reinhardtii].
Cre02.g075050.t1.2	474.116	292.787	655.446	2.23865	1.16263	0.00138906	0.0173804	phosphate transporter 1;6	>XP_001701833 proton/phosphate symporter [Chlamydomonas reinhardtii].	major facilitator superfamily (MFS).	2.A.1.9.4
Cre17.g721553.t1.2	289.147	56.9604	521.333	9.15256	3.19418	0.00139608	0.0174405		>XP_001697118 hypothetical protein CHLREDRAFT_192426 [Chlamydomonas reinhardtii].
Cre12.g498750.t1.3	15.7691	5.93536	25.6028	4.31361	2.10889	0.00140414	0.0175132	Myzus persicae-induced lipase 1	>XP_001702379 triacylglycerol lipase, partial [Chlamydomonas reinhardtii].
g1918.t1	9.09256	2.3504	15.8347	6.73704	2.75212	0.00141788	0.0176706		>XP_001701175 hypothetical protein CHLREDRAFT_178979 [Chlamydomonas reinhardtii].
Cre16.g694950.t1.3	69.8968	20.0528	119.741	5.97128	2.57804	0.00142187	0.0176922	Protein kinase superfamily protein	>XP_001699323 hypothetical protein CHLREDRAFT_159519 [Chlamydomonas reinhardtii].
g8209.t1	9.37404	2.3504	16.3977	6.97657	2.80252	0.00142434	0.0177088		>XP_001690990 phosphatidylinositol phosphatidylcholine transfer protein [Chlamydomonas reinhardtii].
Cre06.g252750.t1.3	3.84999	0	7.69998	Inf	Inf	0.00143036	0.0177415		>XP_001696640 gamete plasma membrane protein [Chlamydomonas reinhardtii].
Cre12.g491350.t1.3	19.5379	7.29856	31.7772	4.3539	2.12231	0.00143572	0.0177939
Cre10.g452100.t1.1	5641.8	3767.46	7516.15	1.99502	0.996402	0.00146391	0.0181146	photosystem II BY	>XP_001692627 ycf32-related polyprotein of photosystem II, partial [Chlamydomonas reinhardtii].
Cre10.g420600.t1.3	4.00091	0	8.00182	Inf	Inf	0.00147557	0.0182408		>XP_001702778 predicted protein, partial [Chlamydomonas reinhardtii].
Cre17.g734450.t1.2	2864.55	1628.34	4100.75	2.51836	1.33248	0.00147644	0.0182408	Ribosomal protein L19 family protein	>XP_001693062 plastid ribosomal protein L19 [Chlamydomonas reinhardtii].
g8362.t1	22.2953	10.7467	33.8439	3.14925	1.65501	0.00148615	0.0183463		>XP_002740010 PREDICTED: SH3 and PX domains 2A-like [Saccoglossus kowalevskii].
g16131.t1	2614.09	564.685	4663.5	8.25858	3.04589	0.00151207	0.0186077	Endomembrane protein 70 protein family	>XP_001699211 EMP/nonaspanin domain family protein [Chlamydomonas reinhardtii].	The Endomembrane protein-70 (EMP70) Family	9.A.2.1.2
Cre16.g657050.t1.2	7.62403	1.95415	13.2939	6.80293	2.76616	0.00151682	0.0186223		>XP_001697904 hypothetical protein CHLREDRAFT_193031 [Chlamydomonas reinhardtii].
Cre01.g052000.t1.2	262.602	169.491	355.712	2.09871	1.0695	0.00151516	0.0186223	Cobalamin biosynthesis CobW-like protein	>XP_001689783 predicted protein, partial [Chlamydomonas reinhardtii].	putative tripartite Zn2+ transporter (TZT) family.	9.B.10.1.1
Cre16.g690130.t1.2	289.337	188.366	390.307	2.07206	1.05107	0.00152941	0.0187476		>XP_001699187 hypothetical protein CHLREDRAFT_185347 [Chlamydomonas reinhardtii].
Cre02.g097950.t1.2	422.586	275.11	570.062	2.07212	1.05111	0.00154189	0.0188711		>XP_001700038 hypothetical protein CHLREDRAFT_166947 [Chlamydomonas reinhardtii].
Cre09.g416309.t1.3	19.7593	3.3143	36.2043	10.9237	3.44939	0.0015475	0.0188991		>XP_002947211 hypothetical protein VOLCADRAFT_87337 [Volvox carteri f. nagariensis].
Cre10.g431400.t1.2	213.236	107.384	319.089	2.97147	1.57118	0.00154901	0.0188991	tRNAse Z1	>XP_001702499 nuclear RNase Z [Chlamydomonas reinhardtii].
Cre03.g207900.t1.1	382.737	120.911	644.563	5.33088	2.41437	0.00156873	0.0190803	Cyclin A2;4	>XP_001693167 A-type cyclin [Chlamydomonas reinhardtii].
g2690.t1	13.296	5.26845	21.3235	4.0474	2.017	0.00158729	0.0192613
g9815.t1	412.508	144.196	680.821	4.72149	2.23924	0.00159464	0.0193355	Protein kinase superfamily protein	>XP_001694779 predicted protein [Chlamydomonas reinhardtii].
Cre14.g617350.t1.3	216.453	144.119	288.786	2.0038	1.00274	0.00160148	0.0194034	Regulator of chromosome condensation (RCC1) family protein	>XP_001689820 predicted protein, partial [Chlamydomonas reinhardtii].
Cre12.g522950.t1.2	1257.87	555.798	1959.94	3.52636	1.81818	0.00161081	0.0194863	septum site-determining protein (MIND)	>XP_001697031 chloroplast septum site-determining protein [Chlamydomonas reinhardtii].
Cre16.g682000.t1.1	2693.19	1844.6	3541.77	1.92007	0.941162	0.0016192	0.019556		>XP_001692058 hypothetical protein CHLREDRAFT_189270 [Chlamydomonas reinhardtii].
Cre17.g724750.t1.2	56.4838	31.2536	81.714	2.61455	1.38656	0.0016422	0.0197494		>XP_001697147 hypothetical protein CHLREDRAFT_192488 [Chlamydomonas reinhardtii].
Cre07.g343800.t1.2	227.315	145.307	309.324	2.12877	1.09002	0.00164137	0.0197494		>XP_001692540 predicted protein [Chlamydomonas reinhardtii].
Cre02.g120150.t1.2	23155.6	14084.2	32227	2.28817	1.19419	0.00167192	0.0200401	ribulose bisphosphate carboxylase small chain 1A	>RBS2_CHLRE RecName: Full=Ribulose bisphosphate carboxylase small chain 2, chloroplastic; Short=RuBisCO small subunit 2; Flags: Precursor.
Cre07.g354500.t1.3	146.583	95.0989	198.067	2.08275	1.05849	0.00168268	0.0201304	heat shock transcription factor A1D	>XP_001702071 heat shock transcription factor 2, partial [Chlamydomonas reinhardtii].
Cre16.g661100.t1.2	23.6686	9.0437	38.2935	4.23428	2.08212	0.00169952	0.0202184	Protein kinase superfamily protein	>XP_001697865 mitogen-activated protein kinase 7, partial [Chlamydomonas reinhardtii].
g9926.t1	66.0605	37.3611	94.7599	2.53633	1.34274	0.00169933	0.0202184		>XP_001694825 predicted protein, partial [Chlamydomonas reinhardtii].
Cre13.g570250.t1.3	79.9888	47.8251	112.153	2.34506	1.22962	0.00169631	0.0202184	SNF1 kinase homolog 10	>XP_001693723 predicted protein, partial [Chlamydomonas reinhardtii].
Cre06.g307200.t1.2	1119.91	693.842	1545.99	2.22815	1.15585	0.00169969	0.0202184	cAMP-regulated phosphoprotein 19-related protein	>XP_001691227 hypothetical protein CHLREDRAFT_183139 [Chlamydomonas reinhardtii].
g6321.t1	55.8026	27.1355	84.4698	3.11289	1.63825	0.00170975	0.0203072
Cre07.g329050.t1.2	21.1125	5.9008	36.3241	6.15579	2.62194	0.00172621	0.0204562	amino acid transporter 1	>XP_001690454 cationic amino acid transporter [Chlamydomonas reinhardtii].	amino acid-polyamine-organocation (APC) family.	2.A.3.3.3
Cre16.g656900.t1.2	65.5285	36.0303	95.0267	2.63741	1.39912	0.00175077	0.0207218		>XP_001697902 hypothetical protein CHLREDRAFT_193029 [Chlamydomonas reinhardtii].
Cre06.g293150.t1.2	119.937	67.6839	172.19	2.54403	1.34712	0.00175827	0.020742		>XP_002946663 hypothetical protein VOLCADRAFT_103079 [Volvox carteri f. nagariensis].
g16717.t1	8.17775	2.16392	14.1916	6.55829	2.71332	0.00177578	0.0209328	ataurora3	>XP_001695896 serine/threonine protein kinase, partial [Chlamydomonas reinhardtii].
Cre17.g742550.t1.2	86.301	49.8672	122.735	2.46123	1.29938	0.00178256	0.020997		>XP_001701129 hypothetical protein CHLREDRAFT_153368 [Chlamydomonas reinhardtii].
Cre12.g517700.t1.2	93.3554	55.9274	130.783	2.33845	1.22555	0.00178725	0.0210364	NAD(P)-binding Rossmann-fold superfamily protein	>XP_001697080 chlorophyll b reductase [Chlamydomonas reinhardtii].
Cre06.g255200.t1.1	167.384	102.676	232.091	2.26043	1.1766	0.00180075	0.0211794		>XP_001696631 predicted protein [Chlamydomonas reinhardtii].
Cre01.g007400.t1.3	47.2777	27.0971	67.4582	2.4895	1.31585	0.00180302	0.0211902		>XP_001700279 predicted protein, partial [Chlamydomonas reinhardtii].
Cre06.g287100.t1.3	65.5216	36.7318	94.3114	2.56757	1.3604	0.00181024	0.0212592	calmodulin 1	>XP_001695496 predicted protein [Chlamydomonas reinhardtii].
g9151.t1	12984	2144.51	23823.4	11.1091	3.47366	0.00181238	0.0212683		>XP_001695145 predicted protein, partial [Chlamydomonas reinhardtii].
g9130.t1	330.104	152.768	507.441	3.32165	1.7319	0.00183364	0.0214488		>XP_001695171 predicted protein [Chlamydomonas reinhardtii].
g5651.t1	1420.74	558.536	2282.94	4.08736	2.03117	0.00183934	0.0214882	Bax inhibitor-1 family protein	>XP_001696404 predicted transmembrane protein [Chlamydomonas reinhardtii].	testis-enhanced gene transfer (TEGT) family.	9.B.24.3.1
Cre12.g540650.t1.2	33.2796	15.2152	51.3441	3.37454	1.75469	0.00185991	0.0216639	pleiotropic drug resistance 3	>XP_001693904 predicted protein, partial [Chlamydomonas reinhardtii].	ATP-binding cassette (ABC) superfamily.	3.A.1.205.9
Cre03.g207050.t1.2	15066	3511.68	26620.3	7.58051	2.92229	0.0018653	0.0216945	Ribosomal L29e protein family	>XP_001693175 ribosomal protein L29, component of cytosolic 80S ribosome and 60S large subunit [Chlamydomonas reinhardtii].
Cre06.g271100.t1.1	1198.03	821.079	1574.98	1.91819	0.939742	0.00188277	0.0218814	cell division control 2	>XP_001696492 cyclin dependent kinase [Chlamydomonas reinhardtii].
Cre16.g651350.t1.3	339.521	232.411	446.631	1.92173	0.942403	0.0018995	0.0220595		>XP_002952271 hypothetical protein VOLCADRAFT_92842 [Volvox carteri f. nagariensis].
Cre17.g737800.t1.2	24.6236	11.379	37.8683	3.3279	1.73461	0.0019034	0.0220885
Cre08.g381350.t1.2	34.0061	17.0054	51.0069	2.99946	1.5847	0.00190968	0.022145		>XP_001694231 predicted protein [Chlamydomonas reinhardtii].
g8978.t1	43.4087	24.8197	61.9977	2.49793	1.32073	0.00192998	0.0223472	NAD(P)-binding Rossmann-fold superfamily protein	>XP_002953076 hypothetical protein VOLCADRAFT_82077 [Volvox carteri f. nagariensis].
Cre04.g222000.t1.3	48.4623	26.419	70.5056	2.66875	1.41616	0.00193409	0.0223619	periodic tryptophan protein 2	>XP_002947235 hypothetical protein VOLCADRAFT_87388 [Volvox carteri f. nagariensis].
Cre06.g289100.t1.3	69.0915	42.2678	95.9151	2.26922	1.1822	0.0019381	0.0223721		>XP_001702257 hypothetical protein CHLREDRAFT_181280 [Chlamydomonas reinhardtii].
Cre16.g656750.t1.3	147.221	90.2643	204.177	2.26199	1.17759	0.00193925	0.0223721		>XP_001697902 hypothetical protein CHLREDRAFT_193029 [Chlamydomonas reinhardtii].
Cre16.g691850.t1.2	834.771	509.692	1159.85	2.27559	1.18624	0.00194377	0.0224077		>XP_001699294 cytochrome c oxidase subunit [Chlamydomonas reinhardtii].
Cre09.g388850.t1.1	1657.55	1156.34	2158.77	1.8669	0.900648	0.00196429	0.0225778	autoinhibited Ca(2+)-ATPase 10	>XP_001694546 calmodulin binding calcium-transporting ATPase [Chlamydomonas reinhardtii].	P-type ATPase (P-ATPase) superfamily.	3.A.3.2.17
Cre01.g032800.t1.2	62.6618	38.0242	87.2995	2.29589	1.19906	0.00196813	0.0226054	magnesium transporter 9	>XP_001689606 metal ion transporter, partial [Chlamydomonas reinhardtii].
Cre03.g163950.t1.2	8.33173	2.32406	14.3394	6.16998	2.62527	0.0019707	0.0226183		>XP_001703378 cysteine dioxygenase [Chlamydomonas reinhardtii].
Cre06.g263950.t1.3	109.038	56.3883	161.687	2.86738	1.51974	0.00198717	0.022774	endoplasmic reticulum-type calcium-transporting ATPase 3	>XP_001696293 sodium/potassium-transporting ATPase alpha subunit [Chlamydomonas reinhardtii].	P-type ATPase (P-ATPase) superfamily.	3.A.3.1.1
Cre12.g494800.t1.3	33.7404	7.72936	59.7515	7.73046	2.95055	0.00200632	0.0229767		>XP_001700527 flagellar inner arm dynein light chain p28 [Chlamydomonas reinhardtii].
g1227.t1	488.293	304.705	671.88	2.20502	1.14079	0.00201621	0.0230731	Protein phosphatase 2A, regulatory subunit PR55	>XP_001700181 PP2A-twin subunit [Chlamydomonas reinhardtii].
Cre09.g397250.t1.2	1006.11	667.713	1344.5	2.01359	1.00977	0.00201874	0.0230852	fatty acid desaturase 5	>XP_001694618 MGDG specific palmitate delta-7 desaturase [Chlamydomonas reinhardtii].
g9914.t1	21.7968	8.96773	34.6258	3.86116	1.94903	0.00203663	0.023222		>XP_001694726 predicted protein, partial [Chlamydomonas reinhardtii].
Cre10.g467150.t1.1	147.103	89.2057	205.001	2.29807	1.20042	0.00205485	0.0233958		>XP_001698461 hypothetical protein CHLREDRAFT_205974 [Chlamydomonas reinhardtii].
Cre14.g633700.t1.2	62.8077	36.5483	89.0671	2.43697	1.28509	0.0020623	0.0234635		>XP_002952380 hypothetical protein VOLCADRAFT_93079 [Volvox carteri f. nagariensis].
Cre14.g609600.t1.3	36.6844	19.5279	53.8408	2.75712	1.46316	0.00207003	0.0235227		>XP_001701362 hypothetical protein CHLREDRAFT_179436, partial [Chlamydomonas reinhardtii].
Cre02.g104200.t1.3	45.1947	24.7173	65.672	2.65692	1.40975	0.00207201	0.0235227	Protein kinase superfamily protein	>XP_001699774 hypothetical protein CHLREDRAFT_141851, partial [Chlamydomonas reinhardtii].
Cre10.g443400.t1.3	168.03	101.246	234.815	2.31926	1.21367	0.00207429	0.0235317		>XP_001690507 hypothetical protein CHLREDRAFT_144154, partial [Chlamydomonas reinhardtii].
Cre02.g116050.t1.3	93.615	39.1776	148.052	3.77901	1.91801	0.00208147	0.023596		>XP_001699647 hypothetical protein CHLREDRAFT_141621, partial [Chlamydomonas reinhardtii].
Cre01.g054200.t1.2	228.43	144.065	312.795	2.17122	1.1185	0.00208424	0.0236012		>XP_001689808 predicted protein, partial [Chlamydomonas reinhardtii].
g9659.t1	79.8513	49.5401	110.163	2.22371	1.15297	0.00211227	0.0238417	Protein kinase superfamily protein with octicosapeptide/Phox/Bem1p domain	>XP_001695064 predicted protein, partial [Chlamydomonas reinhardtii].
Cre12.g523250.t1.3	16.4012	7.8895	24.913	3.15774	1.65889	0.00215146	0.0242318	MATE efflux family protein	>XP_002947963 hypothetical protein VOLCADRAFT_103747 [Volvox carteri f. nagariensis].	multidrug/oligosaccharidyl-lipid/polysaccharide (MOP) flippase superfamily.	2.A.66.1.16
g4108.t1	13.3948	5.47822	21.3114	3.89021	1.95985	0.00217446	0.0244381		>EIE23660 hypothetical protein COCSUDRAFT_47384 [Coccomyxa subellipsoidea C-169].
Cre07.g316000.t1.2	187.572	99.7081	275.435	2.76242	1.46593	0.0021825	0.0244934	nuclear transport factor 2B	>XP_001700802 hypothetical protein CHLREDRAFT_113074 [Chlamydomonas reinhardtii].
Cre13.g605700.t1.2	57.6017	31.6994	83.5039	2.63424	1.39739	0.0021825	0.0244934		>XP_001699080 hypothetical protein CHLREDRAFT_152189 [Chlamydomonas reinhardtii].
Cre16.g674400.t1.2	115.473	61.8936	169.052	2.73133	1.44961	0.00218582	0.0245131
Cre02.g145350.t1.3	24.899	11.4286	38.3693	3.35729	1.7473	0.00219917	0.0246275		>XP_001694999 hypothetical protein CHLREDRAFT_191248 [Chlamydomonas reinhardtii].
g170.t1	50.8622	3.92337	97.8011	24.9278	4.63969	0.00223933	0.0250236		>BAA25763 reverse transcriptase [Chlorella vulgaris].
Cre10.g461100.t1.2	9.95362	3.63459	16.2727	4.47717	2.16259	0.00226782	0.025252		>XP_001698411 hypothetical protein CHLREDRAFT_168238 [Chlamydomonas reinhardtii].
Cre08.g366000.t1.2	87.0438	48.6124	125.475	2.58114	1.36801	0.00226465	0.025252	Transmembrane proteins 14C	>XP_001696048 hypothetical protein CHLREDRAFT_150204 [Chlamydomonas reinhardtii].
Cre04.g227400.t1.2	36.7131	18.3197	55.1065	3.00805	1.58883	0.00226991	0.0252573	ferric reduction oxidase 2	>XP_001692233 ferric-chelate reductase/ oxidoreductase [Chlamydomonas reinhardtii].	phagocyte (gp91phox) NADPH oxidase family.	5.B.1.4.2
g6872.t1	23.3031	11.9467	34.6596	2.90119	1.53664	0.00227574	0.0253043	homolog of Xeroderma pigmentosum complementation group B 2	>XP_002949854 hypothetical protein VOLCADRAFT_90307 [Volvox carteri f. nagariensis].
g17714.t1	3.75922	0	7.51844	Inf	Inf	0.00228882	0.0254137		>XP_001702896 predicted protein, partial [Chlamydomonas reinhardtii].
Cre10.g450350.t1.2	54.4239	28.6212	80.2265	2.80304	1.48699	0.00229253	0.0254188		>ABU90455 intraflagellar transport protein 25 [Chlamydomonas reinhardtii].
Cre07.g354900.t1.3	33.9395	15.9084	51.9705	3.26686	1.7079	0.00230517	0.0255229		>XP_001702053 predicted protein [Chlamydomonas reinhardtii].
Cre01.g050450.t1.3	19.7798	9.34891	30.2107	3.23146	1.69219	0.00231502	0.0255958	tubulin-tyrosine ligases;tubulin-tyrosine ligases	>XP_001690244 predicted protein [Chlamydomonas reinhardtii].
Cre03.g200700.t1.2	30.5555	15.4564	45.6546	2.95376	1.56255	0.00232218	0.0256569		>XP_001693367 flagellar associated protein [Chlamydomonas reinhardtii].
Cre09.g391200.t1.3	9.98254	3.3143	16.6508	5.02392	2.32881	0.00233824	0.0257798	myb domain protein 83	>XP_001694453 predicted protein [Chlamydomonas reinhardtii].
Cre16.g674900.t1.3	5.03102	0.346623	9.71541	28.0288	4.80884	0.00234589	0.0258164	Protein kinase superfamily protein	>XP_001695938 hypothetical protein CHLREDRAFT_149155 [Chlamydomonas reinhardtii].
Cre02.g147050.t1.2	64.0291	35.0897	92.9684	2.64945	1.40569	0.0023465	0.0258164		>XP_001695015 predicted protein, partial [Chlamydomonas reinhardtii].
Cre01.g031650.t1.3	16.8973	6.70457	27.0901	4.04055	2.01455	0.00235679	0.0259114	Galactosyl transferase GMA12/MNN10 family protein	>XP_001689593 protein with potential galactosyl transferase activity [Chlamydomonas reinhardtii].
Cre02.g101800.t1.3	67.6499	39.3792	95.9206	2.43582	1.28441	0.00235932	0.0259212	Class I peptide chain release factor	>XP_002950688 hypothetical protein VOLCADRAFT_104814 [Volvox carteri f. nagariensis].
g4945.t1	4.8781	0.506765	9.24944	18.2519	4.18998	0.00236247	0.0259376		>XP_001692219 hypothetical protein CHLREDRAFT_171055, partial [Chlamydomonas reinhardtii].
Cre02.g113950.t1.3	3.65735	0	7.3147	Inf	Inf	0.0023688	0.0259707		>XP_001699894 hypothetical protein CHLREDRAFT_186746 [Chlamydomonas reinhardtii].
Cre07.g327250.t1.3	59.7115	34.431	84.9919	2.46847	1.30362	0.00238667	0.0261482		>XP_001690653 hypothetical protein CHLREDRAFT_144426, partial [Chlamydomonas reinhardtii].
Cre01.g015850.t1.1	28.3439	12.8384	43.8493	3.41548	1.77209	0.00244199	0.0266798		>XP_001689915 flagellar associated protein [Chlamydomonas reinhardtii].
Cre04.g220500.t1.2	24.8666	11.1316	38.6016	3.46773	1.79399	0.00245388	0.0267911		>XP_001692169 hypothetical protein CHLREDRAFT_189397 [Chlamydomonas reinhardtii].
Cre02.g077850.t1.2	3417.5	2260.23	4574.76	2.02402	1.01722	0.00248929	0.027121		>XP_001701858 predicted protein [Chlamydomonas reinhardtii].
Cre03.g153400.t1.2	85.5522	49.9199	121.185	2.42758	1.27952	0.0024985	0.0272024		>XP_002950170 hypothetical protein VOLCADRAFT_117467, partial [Volvox carteri f. nagariensis].
Cre17.g708050.t1.3	91.0235	57.1213	124.926	2.18703	1.12897	0.0025014	0.027215	PAS domain-containing protein tyrosine kinase family protein	>XP_001691550 hypothetical protein CHLREDRAFT_170338 [Chlamydomonas reinhardtii].
Cre05.g235650.t1.3	115.114	70.7289	159.498	2.25507	1.17317	0.00251646	0.02736		>XP_001697811 hypothetical protein CHLREDRAFT_176462, partial [Chlamydomonas reinhardtii].
Cre09.g406800.t1.3	82.1052	35.7528	128.458	3.59294	1.84517	0.00252188	0.0273809	Peptidase S24/S26A/S26B/S26C family protein	>XP_002950512 hypothetical protein VOLCADRAFT_81137 [Volvox carteri f. nagariensis].
Cre02.g098750.t1.2	92.0287	60.1409	123.916	2.06044	1.04295	0.00252183	0.0273809	STELAR K+ outward rectifier	>XP_001699828 predicted protein, partial [Chlamydomonas reinhardtii].	voltage-gated ion channel (VIC) superfamily.	1.A.1.5.4
Cre06.g251600.t1.2	62.8289	38.1265	87.5313	2.29581	1.19901	0.0025284	0.0273948	Translation initiation factor IF2/IF5	>ADF43122 EIF5Bbp [Chlamydomonas reinhardtii].
g15188.t2	8.94733	0	17.8947	Inf	Inf	0.00253886	0.0274617		>XP_001692775 predicted protein, partial [Chlamydomonas reinhardtii].
g9135.t1	301.156	189.574	412.738	2.17719	1.12247	0.00253983	0.0274617
g16270.t1	9.92245	3.3143	16.5306	4.98766	2.31836	0.00256883	0.0276798	TLD-domain containing nucleolar protein	>XP_001691981 hypothetical protein CHLREDRAFT_170889 [Chlamydomonas reinhardtii].
Cre01.g024350.t1.2	4084.1	1028.25	7139.95	6.94382	2.79573	0.002599	0.0279857	Endomembrane protein 70 protein family	>XP_001689987 EMP/nonaspanin domain family protein [Chlamydomonas reinhardtii].	The Endomembrane protein-70 (EMP70) Family	9.A.2.1.3
Cre02.g094900.t1.3	94.399	62.4619	126.336	2.02261	1.01622	0.00262408	0.028217	Tetratricopeptide repeat (TPR)-like superfamily protein	>XP_002950583 hypothetical protein VOLCADRAFT_91119 [Volvox carteri f. nagariensis].
Cre10.g457550.t1.2	31.8466	17.4249	46.2683	2.6553	1.40887	0.00262964	0.0282574	homolog of yeast autophagy 18 (ATG18) B	>XP_001698567 hypothetical protein CHLREDRAFT_187711 [Chlamydomonas reinhardtii].
Cre09.g414100.t1.2	135.405	29.7445	241.066	8.10456	3.01873	0.00263169	0.0282601		>XP_001696727 hypothetical protein CHLREDRAFT_192126 [Chlamydomonas reinhardtii].
Cre12.g489150.t1.2	424.277	297.532	551.023	1.85198	0.889066	0.00264102	0.0283215		>XP_002948209 hypothetical protein VOLCADRAFT_116796 [Volvox carteri f. nagariensis].
g9110.t2	174.666	19.0933	330.239	17.2961	4.11237	0.00265542	0.0284176	ADP/ATP carrier 3	>XP_001695177 adenine nucleotide translocator [Chlamydomonas reinhardtii].
Cre12.g542150.t1.2	40.0959	19.546	60.6457	3.10271	1.63353	0.00270608	0.028904		>XP_001694071 predicted protein [Chlamydomonas reinhardtii].
g8826.t1	15.0141	6.03461	23.9936	3.976	1.99132	0.00273225	0.0291007	Tetratricopeptide repeat (TPR)-like superfamily protein	>BAF98914 subunit of axonemal inner dynein [Chlamydomonas reinhardtii].
Cre07.g349750.t1.2	160.143	102.104	218.182	2.13686	1.09549	0.00274497	0.0292163		>XP_001692471 predicted protein [Chlamydomonas reinhardtii].
Cre06.g283900.t1.2	476.983	194.196	759.771	3.9124	1.96805	0.00274696	0.0292177		>XP_001695343 predicted protein, partial [Chlamydomonas reinhardtii].
g1341.t3	14.4979	6.25869	22.7371	3.63289	1.86112	0.00280404	0.0297441	PLAC8 family protein	>XP_001701630 predicted protein [Chlamydomonas reinhardtii].
Cre07.g326900.t1.2	29.8513	15.3866	44.3161	2.88018	1.52616	0.00280296	0.0297441		>XP_001690472 hypothetical protein CHLREDRAFT_188528 [Chlamydomonas reinhardtii].
Cre12.g485750.t1.1	11.116	3.50078	18.7311	5.35056	2.41969	0.00281508	0.029841	Protein of unknown function (DUF167)	>XP_001690888 predicted protein [Chlamydomonas reinhardtii].
g6901.t1	6.83535	1.20001	12.4707	10.3921	3.37742	0.00283126	0.0299517
Cre10.g445750.t1.2	318.312	212.775	423.849	1.99201	0.994223	0.00286649	0.0302814
Cre11.g477400.t1.3	15.6156	6.67823	24.553	3.67658	1.87836	0.00288096	0.030375	response regulator 11	>XP_001697357 guanylate cyclase, partial [Chlamydomonas reinhardtii].
Cre16.g675630.t1.2	79.1872	52.5596	105.815	2.01323	1.00951	0.00288965	0.0304067
Cre01.g050650.t1.2	68.4592	39.371	97.5474	2.47765	1.30897	0.00289404	0.0304311		>XP_002958147 hypothetical protein VOLCADRAFT_107992 [Volvox carteri f. nagariensis].
Cre17.g714250.t1.2	53.6148	31.2707	75.9588	2.42907	1.2804	0.00292331	0.0306977	thioredoxin H-type 8	>XP_001700453 flagellar outer arm dynein 14 kDa light chain LC5 [Chlamydomonas reinhardtii].
Cre17.g722607.t1.2	23.0749	7.26096	38.8888	5.35588	2.42112	0.00293062	0.0307378
g4368.t1	16.1199	7.00156	25.2382	3.60465	1.84986	0.00293861	0.0307965
Cre01.g054700.t1.2	5.6576	0.693246	10.622	15.3221	3.93754	0.00295628	0.0308991		>XP_002948592 hypothetical protein VOLCADRAFT_103925 [Volvox carteri f. nagariensis].
Cre02.g143500.t1.1	38.4752	22.2595	54.6909	2.45697	1.29688	0.0029561	0.0308991		>XP_002950511 3'5'-cyclic nucleotide phosphodiesterase [Volvox carteri f. nagariensis].
Cre10.g444000.t1.2	420.3	293.639	546.96	1.8627	0.897393	0.00297147	0.0310165		>XP_001690500 hypothetical protein CHLREDRAFT_182874 [Chlamydomonas reinhardtii].
Cre13.g580350.t1.2	142.666	42.8845	242.448	5.65352	2.49915	0.00302172	0.0314572		>XP_001693569 predicted protein, partial [Chlamydomonas reinhardtii].
g8178.t1	44.3908	26.8377	61.9439	2.30809	1.2067	0.00307323	0.031951	CCT motif family protein	>XP_002950263 hypothetical protein VOLCADRAFT_90708 [Volvox carteri f. nagariensis].
Cre06.g263300.t1.2	731.8	452.394	1011.21	2.23523	1.16042	0.00308359	0.0320375	peroxin 11D	>XP_002946141 hypothetical protein VOLCADRAFT_102755 [Volvox carteri f. nagariensis].
Cre06.g252801.t1.3	72.8526	36.2475	109.458	3.01972	1.59442	0.00312205	0.0323513	alpha/beta-Hydrolases superfamily protein	>ADF43143 LPS1p [Chlamydomonas reinhardtii].
Cre12.g516650.t1.3	88.8811	45.4949	132.267	2.9073	1.53968	0.00312078	0.0323513	PB1 domain-containing protein tyrosine kinase	>XP_001697964 serine/threonine protein kinase 6, partial [Chlamydomonas reinhardtii].
Cre16.g664150.t1.3	118.966	75.5313	162.4	2.15011	1.10441	0.0031363	0.032456		>XP_001701483 3',5'-cyclic-nucleotide phosphodiesterase, partial [Chlamydomonas reinhardtii].
Cre13.g606500.t1.2	285.892	151.522	420.262	2.77361	1.47177	0.0031626	0.0326851		>XP_002947858 hypothetical protein VOLCADRAFT_103633 [Volvox carteri f. nagariensis].
Cre10.g419800.t1.2	494.743	224.333	765.152	3.41078	1.7701	0.003173	0.0327494	phosphatidylinositol synthase 1	>XP_001702616 phosphatidylinositol synthase [Chlamydomonas reinhardtii].
Cre03.g162500.t1.3	22.499	10.2783	34.7198	3.37798	1.75616	0.00318148	0.0328153		>XP_001703390 predicted protein, partial [Chlamydomonas reinhardtii].
Cre10.g429850.t1.2	15.394	5.60381	25.1842	4.49413	2.16804	0.00324196	0.033353		>XP_001702519 predicted protein [Chlamydomonas reinhardtii].
g16146.t1	3.46848	0	6.93696	Inf	Inf	0.00326926	0.0335881		>XP_001699268 hypothetical protein CHLREDRAFT_121332, partial [Chlamydomonas reinhardtii].
Cre03.g151950.t1.2	34.0473	11.8625	56.2321	4.74033	2.24499	0.0032842	0.0336974		>XP_001695656 zygote-specific protein [Chlamydomonas reinhardtii].
Cre13.g575500.t1.3	85.4901	54.401	116.579	2.14296	1.09961	0.00330358	0.0338741		>XP_001693520 predicted protein [Chlamydomonas reinhardtii].
g2693.t1	4.6893	0.506765	8.87183	17.5068	4.12984	0.00331122	0.0339302	mitochondrial HSO70 2	>XP_001703815 predicted protein, partial [Chlamydomonas reinhardtii].
g11597.t1	7.10779	2.41129	11.8043	4.89543	2.29144	0.00332607	0.0340157
Cre09.g414650.t1.3	53.3131	31.734	74.8923	2.36	1.23879	0.0033562	0.0342792	cell division control 2	>XP_002956729 hypothetical protein VOLCADRAFT_67308, partial [Volvox carteri f. nagariensis].
Cre01.g035450.t1.2	33.8312	17.6873	49.9752	2.82548	1.49849	0.00336097	0.0343055	Bax inhibitor-1 family protein	>XP_001690098 predicted protein [Chlamydomonas reinhardtii].	testis-enhanced gene transfer (TEGT) family.	9.B.24.3.1
g6677.t1	30.0849	15.1858	44.984	2.96224	1.56669	0.00336381	0.0343122	Protein kinase superfamily protein	>XP_001695371 predicted protein, partial [Chlamydomonas reinhardtii].
Cre10.g424150.t1.2	113.816	65.7441	161.888	2.46239	1.30006	0.00340054	0.0346642	transcription initiation factor IIA gamma chain / TFIIA-gamma (TFIIA-S)	>XP_001702744 predicted protein [Chlamydomonas reinhardtii].
Cre05.g230600.t1.3	66.5058	42.2852	90.7263	2.14558	1.10137	0.00341217	0.0347602	Regulator of chromosome condensation (RCC1) family protein	>XP_001702277 hypothetical protein CHLREDRAFT_122886 [Chlamydomonas reinhardtii].
Cre17.g722050.t1.3	16.1677	1.86692	30.4684	16.3202	4.02858	0.00343168	0.0348665		>XP_002946081 hypothetical protein VOLCADRAFT_120172 [Volvox carteri f. nagariensis].
Cre12.g527700.t1.3	47.6942	28.1866	67.2018	2.38417	1.25349	0.00343461	0.0348665		>XP_001696983 hypothetical protein CHLREDRAFT_150677, partial [Chlamydomonas reinhardtii].
Cre17.g722650.t1.2	163.418	103.663	223.174	2.15288	1.10627	0.00343595	0.0348665		>XP_001695729 hypothetical protein CHLREDRAFT_175258 [Chlamydomonas reinhardtii].
Cre01.g041150.t1.2	188.647	100.301	276.994	2.76164	1.46552	0.00345429	0.0349847
g1229.t1	105.185	66.2553	144.115	2.17515	1.12112	0.00345291	0.0349847	centrin2	>XP_001700232 predicted protein, partial [Chlamydomonas reinhardtii].
g9755.t1	52.1615	31.2242	73.0988	2.3411	1.22718	0.00346568	0.0350775		>XP_001694670 hypothetical protein CHLREDRAFT_148896 [Chlamydomonas reinhardtii].
g1856.t1	101.523	63.9658	139.08	2.17428	1.12054	0.00351462	0.0355269	nucleosome assembly protein 1;2	>XP_001701235 nucleosome assembly protein, partial [Chlamydomonas reinhardtii].
Cre05.g230981.t1.2	53.7132	33.6498	73.7766	2.19248	1.13257	0.0035332	0.0356917		>XP_001702263 hypothetical protein CHLREDRAFT_165185 [Chlamydomonas reinhardtii].
g9146.t1	24.7043	12.861	36.5476	2.84175	1.50678	0.00353737	0.0357108		>XP_001702330 hypothetical protein CHLREDRAFT_186151 [Chlamydomonas reinhardtii].
Cre01.g045650.t1.2	527.335	369.809	684.862	1.85194	0.889035	0.00356266	0.0359429	DnaJ/Hsp40 cysteine-rich domain superfamily protein	>XP_001689727 DnaJ-like zinc-finger protein [Chlamydomonas reinhardtii].
g15209.t1	202.69	120.852	284.527	2.35433	1.23532	0.00358832	0.0361786
Cre02.g103950.t1.2	22.1287	10.1181	34.1394	3.37408	1.7545	0.00363694	0.0366217		>XP_001699777 flagellar associated protein [Chlamydomonas reinhardtii].
Cre03.g154550.t1.3	149.296	94.3434	204.248	2.16494	1.11433	0.00368256	0.0370097	pyrroline-5- carboxylate (P5C) reductase	>XP_001697466 pyrroline-5-carboxylate reductase [Chlamydomonas reinhardtii].
g12052.t1	11.9377	4.21731	19.6582	4.6613	2.22073	0.00368537	0.0370142	Protein kinase superfamily protein	>XP_001703182 hypothetical protein CHLREDRAFT_180381, partial [Chlamydomonas reinhardtii].
Cre16.g674350.t1.2	259.058	175.746	342.369	1.94809	0.962062	0.00370684	0.0372061		>XP_001695933 mitochondrial ribosomal protein S13 [Chlamydomonas reinhardtii].
Cre06.g307050.t1.3	4.86784	0.803762	8.93191	11.1126	3.47413	0.00372484	0.0373628		>XP_001691374 predicted protein [Chlamydomonas reinhardtii].
Cre12.g528250.t1.3	41.8233	25.7106	57.9359	2.25338	1.17209	0.00375429	0.0376341		>XP_001696866 hypothetical protein CHLREDRAFT_192575 [Chlamydomonas reinhardtii].
Cre13.g590850.t1.2	165.781	114.213	217.35	1.90303	0.928297	0.00378472	0.0378907		>XP_002957320 hypothetical protein VOLCADRAFT_98378 [Volvox carteri f. nagariensis].
g12311.t1	3.38641	0	6.77283	Inf	Inf	0.00379644	0.0379354
g9697.t1	26.6971	14.8911	38.5031	2.58565	1.37053	0.00379483	0.0379354
Cre13.g605750.t1.2	374.42	266.917	481.922	1.80551	0.85241	0.00380343	0.037981		>XP_001699135 hypothetical protein CHLREDRAFT_193519 [Chlamydomonas reinhardtii].
g2932.t1	185.86	98.1177	273.602	2.78851	1.47949	0.00382075	0.0381297		>XP_001695728 hypothetical protein CHLREDRAFT_192007, partial [Chlamydomonas reinhardtii].
Cre10.g466100.t1.2	29.6257	13.855	45.3964	3.27653	1.71217	0.00384291	0.0382778		>XP_001698639 predicted protein [Chlamydomonas reinhardtii].
g17193.t1	39.7187	22.3122	57.1252	2.56027	1.3563	0.0038413	0.0382778
Cre01.g016850.t1.2	126.344	74.5689	178.119	2.38865	1.25619	0.00386853	0.0384596	Uncharacterised protein family SERF	>XP_001689924 predicted protein [Chlamydomonas reinhardtii].
Cre09.g389150.t1.2	86.7283	54.5327	118.924	2.18078	1.12485	0.00390227	0.0387356		>XP_001694550 flagellar associated protein [Chlamydomonas reinhardtii].
Cre06.g252650.t1.2	2111.03	1266.81	2955.26	2.33283	1.22208	0.00391542	0.0388028	Aconitase/3-isopropylmalate dehydratase protein	>XP_001696402 isopropylmalate dehydratase, small subunit [Chlamydomonas reinhardtii].
Cre17.g729950.t1.2	256.51	175.857	337.163	1.91725	0.939041	0.00392158	0.0388147	sulfiredoxin	>XP_002949703 hypothetical protein VOLCADRAFT_59680, partial [Volvox carteri f. nagariensis].
Cre16.g677650.t1.3	73.2486	48.1679	98.3294	2.04139	1.02955	0.00393642	0.038937		>XP_001695961 hypothetical protein CHLREDRAFT_149207, partial [Chlamydomonas reinhardtii].
Cre13.g583350.t1.3	18.7429	8.57148	28.9144	3.37333	1.75417	0.00396823	0.0391775		>XP_001693595 predicted protein, partial [Chlamydomonas reinhardtii].
g7558.t1	48.9903	24.6055	73.3752	2.98207	1.57631	0.00397555	0.0392251	CAX interacting protein 1	>XP_001702880 glutaredoxin, CGFS type [Chlamydomonas reinhardtii].
g17584.t1	55.0976	31.4664	78.7288	2.502	1.32308	0.00399648	0.0393821
Cre14.g612800.t1.2	279.407	183.243	375.572	2.04958	1.03533	0.00407499	0.0400048		>XP_001698981 hypothetical protein CHLREDRAFT_185267 [Chlamydomonas reinhardtii].
Cre13.g588650.t1.2	834.678	586.354	1083	1.84701	0.885195	0.00407311	0.0400048		>XP_001693639 predicted protein [Chlamydomonas reinhardtii].
Cre06.g307150.t1.3	614.652	408.842	820.462	2.0068	1.00489	0.00410645	0.0402129	chloroplast beta-amylase	>XP_001691372 beta-amylase [Chlamydomonas reinhardtii].
g11510.t1	40.7273	24.2745	57.1801	2.35556	1.23607	0.00412425	0.0403621
Cre07.g325350.t1.3	98.3478	68.4349	128.261	1.8742	0.906276	0.00414562	0.0404954	P-loop containing nucleoside triphosphate hydrolases superfamily protein	>XP_002955108 Kif4A type kinesin, partial [Volvox carteri f. nagariensis].
Cre03.g196700.t1.3	9.31384	2.85716	15.7705	5.51965	2.46458	0.00416765	0.0406851		>XP_001693135 predicted protein [Chlamydomonas reinhardtii].
g1260.t1	25.8785	8.96773	42.7893	4.77147	2.25443	0.00419899	0.0409657	BTB/POZ domain-containing protein	>XP_001700238 predicted protein [Chlamydomonas reinhardtii].
Cre09.g404850.t1.3	40.4858	23.8061	57.1654	2.40129	1.26381	0.00420346	0.0409838		>XP_001700132 predicted protein, partial [Chlamydomonas reinhardtii].
Cre12.g555600.t1.3	27.1482	13.9392	40.3572	2.89523	1.53368	0.00421825	0.0410812		>XP_001694170 gelsolin, partial [Chlamydomonas reinhardtii].
Cre14.g620500.t1.2	1129.25	798.892	1459.6	1.82703	0.869504	0.00425104	0.0413704	Integrase-type DNA-binding superfamily protein	>XP_001689851 predicted protein [Chlamydomonas reinhardtii].
Cre02.g141350.t1.2	69.2562	43.9311	94.5814	2.15295	1.10631	0.00428357	0.0415838		>XP_001694844 flagellar associated protein [Chlamydomonas reinhardtii].
Cre16.g688650.t1.2	17.1582	8.12561	26.1908	3.22325	1.68851	0.00429703	0.0416629	phosphatidyl inositol monophosphate 5 kinase	>XP_002952087 hypothetical protein VOLCADRAFT_81711 [Volvox carteri f. nagariensis].
Cre03.g172550.t1.2	544.304	384.315	704.294	1.8326	0.87389	0.00429495	0.0416629	arginine methyltransferase 11	>XP_001703304 protein arginine N-methyltransferase [Chlamydomonas reinhardtii].
g4479.t1	4.44954	0.346623	8.55246	24.6737	4.6249	0.00431349	0.0417844		>XP_001693002 predicted protein [Chlamydomonas reinhardtii].
Cre16.g681350.t1.1	16.111	6.57898	25.643	3.89772	1.96263	0.0043149	0.0417844		>XP_001691889 hypothetical protein CHLREDRAFT_170702 [Chlamydomonas reinhardtii].
g14635.t1	4.36925	0.506765	8.23174	16.2437	4.02181	0.00437425	0.0421768
Cre02.g090000.t1.3	48.3941	28.3783	68.4099	2.41065	1.26942	0.00436204	0.0421768		>XP_001701768 predicted protein [Chlamydomonas reinhardtii].
Cre09.g409600.t1.1	35.5502	20.3813	50.7191	2.48851	1.31528	0.00438616	0.0422657		>XP_001696779 hypothetical protein CHLREDRAFT_158611 [Chlamydomonas reinhardtii].
g4565.t1	9.9286	3.04364	16.8136	5.52416	2.46576	0.00439742	0.0423222		>XP_001701249 hypothetical protein CHLREDRAFT_82554 [Chlamydomonas reinhardtii].
g8540.t1	3.30435	0	6.6087	Inf	Inf	0.00441169	0.0424334
Cre12.g556300.t1.2	45.8547	24.8611	66.8484	2.68888	1.42701	0.00443532	0.0425477		>XP_001694050 flagellar/basal body protein [Chlamydomonas reinhardtii].
Cre13.g607750.t1.2	38.6112	21.3979	55.8244	2.60888	1.38343	0.00443714	0.0425477		>XP_002953818 hypothetical protein VOLCADRAFT_106097, partial [Volvox carteri f. nagariensis].
Cre17.g710000.t1.3	192.533	112.873	272.193	2.41149	1.26992	0.0044356	0.0425477	Protein kinase superfamily protein with octicosapeptide/Phox/Bem1p domain	>XP_001691531 predicted protein, partial [Chlamydomonas reinhardtii].
Cre12.g483750.t1.2	470.454	190.978	749.93	3.92678	1.97335	0.00444641	0.0426106		>XP_001703185 hypothetical protein CHLREDRAFT_186004 [Chlamydomonas reinhardtii].
Cre07.g316900.t1.3	134.087	94.1485	174.026	1.84842	0.886295	0.0044772	0.042801		>XP_001700994 hypothetical protein CHLREDRAFT_167786 [Chlamydomonas reinhardtii].
g9596.t1	24.8074	10.7505	38.8643	3.61512	1.85404	0.00452456	0.0431728	SPla/RYanodine receptor (SPRY) domain-containing protein	>XP_001695041 predicted protein [Chlamydomonas reinhardtii].
Cre01.g013150.t1.2	259.9	146.349	373.451	2.55179	1.35151	0.0045227	0.0431728	RmlC-like cupins superfamily protein	>XP_001689888 predicted protein [Chlamydomonas reinhardtii].
Cre08.g369350.t1.1	109.672	53.5514	165.792	3.09594	1.63038	0.0045601	0.0433555		>XP_002948789 hypothetical protein VOLCADRAFT_104005 [Volvox carteri f. nagariensis].
Cre02.g089800.t1.3	29.0748	17.055	41.0947	2.40954	1.26876	0.00455856	0.0433555		>XP_002946391 hypothetical protein VOLCADRAFT_86620 [Volvox carteri f. nagariensis].
Cre08.g360650.t1.2	115.283	70.3959	160.17	2.27528	1.18604	0.00455963	0.0433555		>XP_001702329 hypothetical protein CHLREDRAFT_194775 [Chlamydomonas reinhardtii].
Cre08.g381200.t1.1	5.51376	0.803762	10.2237	12.7199	3.66901	0.00458047	0.0435228		>XP_001694231 predicted protein [Chlamydomonas reinhardtii].
Cre07.g328350.t1.2	9.39971	3.0173	15.7821	5.23053	2.38696	0.00459736	0.0436568	phosphatidyl inositol monophosphate 5 kinase	>XP_001690461 flagellar associated protein, partial [Chlamydomonas reinhardtii].
Cre13.g586800.t1.3	16.5467	6.13691	26.9564	4.39251	2.13505	0.00461468	0.0437418		>XP_002948709 hypothetical protein VOLCADRAFT_89106 [Volvox carteri f. nagariensis].
g7565.t1	16.7225	8.26246	25.1826	3.04784	1.60778	0.00464113	0.0439659		>XP_002955128 hypothetical protein VOLCADRAFT_121376 [Volvox carteri f. nagariensis].
Cre07.g327900.t1.3	280.211	190.353	370.069	1.94412	0.959117	0.00466699	0.0441842		>XP_001690649 hypothetical protein CHLREDRAFT_188522, partial [Chlamydomonas reinhardtii].
Cre02.g112000.t1.3	31.9519	17.7572	46.1465	2.59875	1.37782	0.00467062	0.0441919	Transmembrane amino acid transporter family protein	>XP_001699689 amino acid transporter [Chlamydomonas reinhardtii].
Cre03.g158050.t1.3	259.513	176.458	342.568	1.94136	0.957065	0.00467756	0.0442042	Protein phosphatase 2C family protein	>XP_001697518 predicted protein [Chlamydomonas reinhardtii].
g16160.t1	298.221	201.037	395.404	1.96682	0.975864	0.0046826	0.0442252		>XP_002952375 hypothetical protein VOLCADRAFT_93070 [Volvox carteri f. nagariensis].
Cre01.g038750.t1.2	17.9143	8.24815	27.5804	3.34383	1.7415	0.00469735	0.0442845		>XP_001690124 predicted protein, partial [Chlamydomonas reinhardtii].
Cre16.g665400.t1.2	337.867	208.728	467.007	2.2374	1.16182	0.00469729	0.0442845	Small nuclear ribonucleoprotein family protein	>XP_001701443 small nuclear ribonucleoprotein Sm D1, partial [Chlamydomonas reinhardtii].
g11967.t1	33.41	17.1693	49.6507	2.89183	1.53198	0.00478712	0.0450495	ankyrin repeat family protein	>XP_001697403 flagella associated protein [Chlamydomonas reinhardtii].	ankyrin family.	8.A.28.1.1
Cre14.g629700.t1.3	95.7189	63.6274	127.81	2.00873	1.00629	0.00479776	0.0450723	NADP-malic enzyme 3	>XP_001692779 NADP malic enzyme [Chlamydomonas reinhardtii].
Cre09.g411100.t1.2	74.5283	12.8648	136.192	10.5864	3.40414	0.00481428	0.0451452	RNA binding Plectin/S10 domain-containing protein	>XP_001696699 ribosomal protein S10, component of cytosolic 80S ribosome and 40S small subunit [Chlamydomonas reinhardtii].
Cre08.g358850.t1.2	14.8884	6.65494	23.1218	3.47438	1.79675	0.00481745	0.0451452		>XP_001702314 hypothetical protein CHLREDRAFT_194756 [Chlamydomonas reinhardtii].
Cre16.g695700.t1.2	63.0369	37.6814	88.3925	2.34579	1.23007	0.00482235	0.0451642	PLAC8 family protein	>XP_001699369 hypothetical protein CHLREDRAFT_193742 [Chlamydomonas reinhardtii].
Cre12.g496100.t1.2	38.6557	22.6092	54.7023	2.41948	1.27469	0.00482906	0.0452001		>XP_001702401 flagellar associated protein [Chlamydomonas reinhardtii].
g1749.t1	4.30023	0	8.60045	Inf	Inf	0.00485448	0.0454108	RNA binding;RNA-directed DNA polymerases	>BAA25763 reverse transcriptase [Chlorella vulgaris].
Cre12.g494050.t1.2	26179.9	14916.9	37442.9	2.5101	1.32774	0.00487356	0.0455621	Ribosomal protein L6 family	>XP_001700532 ribosomal protein L9, component of cytosolic 80S ribosome and 60S large subunit [Chlamydomonas reinhardtii].
g8712.t1	13.3295	4.13314	22.5259	5.45009	2.44628	0.00497606	0.0464316		>XP_001701295 hypothetical protein CHLREDRAFT_179249 [Chlamydomonas reinhardtii].
g5236.t1	961.841	598.107	1325.58	2.21628	1.14814	0.00497841	0.0464316	NADH dehydrogenase (ubiquinone)s	>XP_001700920 NADH:ubiquinone oxidoreductase 7 kDa subunit [Chlamydomonas reinhardtii].	H+ or Na+-translocating NADH dehydrogenase (NDH) family.	3.D.1.6.4
Cre04.g226500.t1.3	105.767	68.9311	142.604	2.06879	1.04879	0.00500408	0.0466156		>XP_001692224 hypothetical protein CHLREDRAFT_189473 [Chlamydomonas reinhardtii].
Cre09.g409650.t1.2	1033.92	689.864	1377.97	1.99745	0.998161	0.00502734	0.0468044	RING/U-box superfamily protein	>XP_001696686 hypothetical protein CHLREDRAFT_184650 [Chlamydomonas reinhardtii].
Cre12.g520350.t1.2	132.877	82.4696	183.284	2.22245	1.15215	0.00505766	0.0470587	aldehyde dehydrogenase 12A1	>XP_001696928 aldehyde dehydrogenase [Chlamydomonas reinhardtii].
g18230.t1	4.33111	0.506765	8.15546	16.0932	4.00838	0.00506753	0.0470947		>XP_001691807 predicted protein [Chlamydomonas reinhardtii].
g6215.t1	57.9712	35.5551	80.3873	2.26093	1.17691	0.00507664	0.0471514	RING/U-box superfamily protein	>XP_001690691 hypothetical protein CHLREDRAFT_206087 [Chlamydomonas reinhardtii].
Cre09.g405750.t1.1	168.154	111.433	224.874	2.01803	1.01295	0.00508783	0.0472274	carbonic anhydrase 1	>XP_001697606 carbonic anhydrase 8 [Chlamydomonas reinhardtii].	sulfate permease (SulP) family.	2.A.53.8.1
Cre12.g551350.t1.2	14.6337	6.81508	22.4523	3.2945	1.72006	0.00512238	0.0474357		>XP_001694009 mbeta non-catalytic subunit of periplasmic L-amino acid oxidase [Chlamydomonas reinhardtii].
Cre03.g188450.t1.2	8.27675	2.67068	13.8828	5.19823	2.37802	0.0051255	0.0474366		>XP_001692020 predicted protein [Chlamydomonas reinhardtii].
g4581.t1	17.8718	8.31209	27.4315	3.3002	1.72255	0.00518505	0.0478747		>XP_001701266 low-CO2-inducible protein [Chlamydomonas reinhardtii].
Cre06.g269750.t1.3	380.235	263.5	496.97	1.88604	0.915358	0.00518971	0.0478895	atypical CYS HIS rich thioredoxin 3	>XP_001696231 thioredoxin-like protein [Chlamydomonas reinhardtii].
g11518.t1	17.9584	9.7068	26.21	2.70017	1.43305	0.00524439	0.0483656	protein kinase family protein / protein phosphatase 2C ( PP2C) family protein	>XP_001700457 serine/threonine protein kinase 16, partial [Chlamydomonas reinhardtii].
Cre03.g170700.t1.3	47.0297	28.8009	65.2585	2.26585	1.18005	0.00526418	0.0485196		>XP_001703318 hypothetical protein CHLREDRAFT_182825 [Chlamydomonas reinhardtii].
Cre02.g114800.t1.2	95.3834	51.9657	138.801	2.67102	1.41739	0.00527439	0.0485851		>XP_001699658 hypothetical protein CHLREDRAFT_160921 [Chlamydomonas reinhardtii].
Cre02.g104000.t1.2	34.8686	18.9835	50.7536	2.67356	1.41876	0.0052826	0.0486036		>XP_001699989 hypothetical protein CHLREDRAFT_166819 [Chlamydomonas reinhardtii].
Cre17.g696500.t1.1	310.572	206.033	415.11	2.01477	1.01062	0.00528612	0.0486075		>XP_001691653 cell wall protein pherophorin-C19 [Chlamydomonas reinhardtii].
Cre01.g030750.t1.3	93.2645	49.6273	136.902	2.7586	1.46393	0.00532387	0.0488686		>XP_001690053 predicted protein [Chlamydomonas reinhardtii].
g2533.t1	162.729	110.812	214.646	1.93704	0.95385	0.00532713	0.04887		>XP_001695009 predicted protein of CSB family [Chlamydomonas reinhardtii].
g5168.t1	1142.77	726.304	1559.23	2.14681	1.10219	0.00533386	0.0489031	alpha/beta-Hydrolases superfamily protein	>XP_002947175 hypothetical protein VOLCADRAFT_87268 [Volvox carteri f. nagariensis].
Cre06.g275050.t1.1	718.913	487.097	950.729	1.95183	0.964827	0.00535693	0.0490859	gamma-glutamyl hydrolase 1	>XP_001696183 gamma-glutamyl hydrolase [Chlamydomonas reinhardtii].
Cre06.g282900.t1.2	648.335	442.735	853.936	1.92878	0.947685	0.00539033	0.0493343		>XP_001695456 coiled-coil domain 6-like protein [Chlamydomonas reinhardtii].
Cre13.g603750.t1.3	154.713	105.901	203.525	1.92184	0.942488	0.00540083	0.0494015	Outward rectifying potassium channel protein	>XP_002955535 hypothetical protein VOLCADRAFT_106827 [Volvox carteri f. nagariensis].	voltage-gated ion channel (VIC) superfamily.	1.A.1.3.1
Cre03.g167850.t1.2	155.296	89.8066	220.785	2.45846	1.29775	0.00543001	0.0495627		>XP_001703512 predicted protein [Chlamydomonas reinhardtii].

## Sheet: PL-EL_Down
Gene id	BaseMean	BaseMeanA	BaseMeanB	foldChange	log2FoldChange	pval	padj	Annotation	Blast	Transporter family	TC number
g3620.t1	132.184	262.908	1.46025	-180.043	-7.4922	2.23384e-38	3.50222e-34		>XP_001703280 hypothetical protein CHLREDRAFT_9571, partial [Chlamydomonas reinhardtii].
Cre07.g346900.t1.3	207.925	410.751	5.09872	-80.5596	-6.33198	1.18646e-37	9.30068e-34		>XP_001692564 predicted protein [Chlamydomonas reinhardtii].
Cre02.g144750.t1.3	347.903	674.127	21.6789	-31.096	-4.95866	6.31653e-29	9.00278e-26	phosphate transporter 2;1	>XP_001694875 sodium/phosphate symporter [Chlamydomonas reinhardtii].	inorganic phosphate transporter (PiT) family.	2.A.20.2.2
g9144.t1	113.144	225.359	0.928623	-242.681	-7.92292	2.82082e-24	2.60146e-21		>AAO25118 flagella membrane glycoprotein 1B [Chlamydomonas reinhardtii].
Cre04.g223100.t1.2	2814.47	5282.23	346.707	-15.2354	-3.92936	1.14339e-22	9.43481e-20	alpha carbonic anhydrase 4	>XP_001692291 carbonic anhydrase [Chlamydomonas reinhardtii].
Cre16.g676150.t1.2	43.904	86.6568	1.15124	-75.2723	-6.23405	3.1669e-22	2.48253e-19	manganese superoxide dismutase 1	>XP_001695947 superoxide dismutase [Mn] [Chlamydomonas reinhardtii].
g9869.t1	58.7192	114.265	3.17397	-36.0005	-5.16995	6.04489e-22	4.30781e-19		>XP_001694802 predicted protein, partial [Chlamydomonas reinhardtii].
Cre12.g512300.t1.2	173.349	331.672	15.0265	-22.0725	-4.46418	6.11672e-21	3.09799e-18	lipoxygenase 1	>XP_001690882 predicted protein [Chlamydomonas reinhardtii].
Cre12.g546550.t1.1	532.165	984.617	79.713	-12.352	-3.62668	2.13515e-18	6.97392e-16		>XP_001693964 Fe-assimilating protein 1 [Chlamydomonas reinhardtii].
Cre03.g161150.t1.3	930.426	1713.55	147.301	-11.633	-3.54015	7.8833e-18	2.37682e-15		>XP_001697417 predicted protein [Chlamydomonas reinhardtii].
Cre12.g544450.t1.2	695.509	1333.93	57.0838	-23.368	-4.54646	9.47096e-18	2.80162e-15
Cre17.g735600.t1.2	23.6566	46.6747	0.63862	-73.0868	-6.19154	3.93993e-16	9.08387e-14	alpha/beta-Hydrolases superfamily protein	>XP_001694736 predicted protein [Chlamydomonas reinhardtii].
g6920.t1	77.6158	145.362	9.86918	-14.7289	-3.88058	6.14603e-16	1.37653e-13		>XP_001691293 cell wall protein pherophorin-C9, partial [Chlamydomonas reinhardtii].
Cre12.g506800.t1.3	98.9881	181.916	16.0603	-11.3271	-3.5017	4.3274e-15	8.07678e-13	ADP-ribosylation factor A1B	>XP_001691012 ARF-like small GTPase [Chlamydomonas reinhardtii].
Cre12.g506750.t1.3	195.878	391.486	0.270997	-1444.61	-10.4965	4.46692e-15	8.2391e-13		>XP_001694116 cell wall protein pherophorin-C4 [Chlamydomonas reinhardtii].
Cre14.g616700.t1.1	34.2303	65.8094	2.65111	-24.8234	-4.63363	5.7417e-15	1.02294e-12		>XP_001690275 predicted protein, partial [Chlamydomonas reinhardtii].
g5380.t1	205.144	369.892	40.397	-9.15642	-3.19478	8.24898e-15	1.45312e-12	P-loop containing nucleoside triphosphate hydrolases superfamily protein	>XP_001700670 ubiquinol:cytochrome c oxidoreductase biogenesis factor [Chlamydomonas reinhardtii].
g786.t1	30.2276	59.3522	1.10299	-53.8101	-5.7498	9.81732e-15	1.71018e-12		>XP_002955528 hypothetical protein VOLCADRAFT_96489 [Volvox carteri f. nagariensis].
Cre05.g235950.t1.2	247.842	446.542	49.1409	-9.08697	-3.1838	1.51971e-14	2.58978e-12		>XP_001697809 hypothetical protein CHLREDRAFT_192778 [Chlamydomonas reinhardtii].
g11530.t1	22.451	44.4085	0.493618	-89.9651	-6.49129	1.59046e-14	2.68121e-12	Calcium-dependent lipid-binding (CaLB domain) family protein	>XP_001698829 hypothetical protein CHLREDRAFT_193339 [Chlamydomonas reinhardtii].
Cre07.g346850.t1.2	88.3877	168.533	8.2421	-20.4478	-4.35388	2.82197e-14	4.60863e-12		>XP_001692564 predicted protein [Chlamydomonas reinhardtii].
Cre17.g739515.t1.3	40.375	75.893	4.8571	-15.6252	-3.9658	5.23692e-14	8.04945e-12
Cre10.g463350.t1.2	36.7617	72.6622	0.861241	-84.3692	-6.39864	1.11201e-13	1.62936e-11		>XP_001698611 hydroxyproline-rich cell wall protein [Chlamydomonas reinhardtii].
Cre08.g365900.t1.2	17.5976	34.7017	0.493618	-70.3006	-6.13546	1.16673e-13	1.6937e-11	chlorophyll A/B binding protein 1	>XP_001696125 stress-related chlorophyll a/b binding protein 1 [Chlamydomonas reinhardtii].
Cre10.g463370.t1.2	20.6986	40.4687	0.928623	-43.5792	-5.44557	1.22768e-13	1.74978e-11
Cre12.g512000.t1.1	398.613	700	97.2259	-7.19972	-2.84794	6.85376e-13	8.80765e-11		>XP_002948175 hypothetical protein VOLCADRAFT_103797 [Volvox carteri f. nagariensis].
Cre16.g656700.t1.2	51.0735	94.1367	8.01034	-11.7519	-3.55482	1.44949e-12	1.74809e-10	kinesin 5	>XP_002954564 kinesin-like protein, partial [Volvox carteri f. nagariensis].
Cre04.g221700.t1.2	707.337	1235.87	178.804	-6.91189	-2.78908	1.70032e-12	1.98938e-10	Cytochrome c oxidase, subunit III	>XP_001692182 cytochrome c oxidase subunit III [Chlamydomonas reinhardtii].	proton-translocating cytochrome oxidase (COX) superfamily.	3.D.4.7.1
Cre02.g078800.t1.2	16.7508	32.8145	0.686996	-47.7652	-5.57789	1.9409e-12	2.25403e-10		>XP_001701663 hypothetical protein CHLREDRAFT_166206 [Chlamydomonas reinhardtii].
Cre03.g178650.t1.1	95.2518	169.081	21.4227	-7.8926	-2.9805	3.3873e-12	3.82058e-10	minichromosome maintenance (MCM2/3/5) family protein	>XP_001703255 minichromosome maintenance protein 6, partial [Chlamydomonas reinhardtii].
g1771.t1	48.9033	89.7186	8.08796	-11.0929	-3.47156	4.19555e-12	4.59984e-10	DC1 domain-containing protein	>XP_001701995 nucleoredoxin 2 [Chlamydomonas reinhardtii].
Cre17.g726850.t1.2	197.473	344.546	50.4003	-6.83619	-2.77319	4.77258e-12	5.12497e-10		>XP_001697166 hypothetical protein CHLREDRAFT_39139, partial [Chlamydomonas reinhardtii].
Cre12.g498550.t1.3	293.824	509.039	78.608	-6.47567	-2.69503	9.70431e-12	1.00095e-09	magnesium-protoporphyrin IX methyltransferase	>XP_001702380 Mg protoporphyrin IX S-adenosyl methionine O-methyl transferase [Chlamydomonas reinhardtii].
Cre16.g653450.t1.2	54.4546	96.4563	12.4529	-7.74569	-2.95339	5.2062e-11	4.977e-09		>XP_001698216 hypothetical protein CHLREDRAFT_193144 [Chlamydomonas reinhardtii].
Cre09.g386400.t1.2	220.127	390.767	49.4865	-7.89643	-2.9812	6.69479e-11	6.24768e-09	ubiquitin activating enzyme 2	>XP_001695180 ubiquitin-activating enzyme E1 [Chlamydomonas reinhardtii].
Cre10.g434850.t1.3	22.73	42.7897	2.67024	-16.0247	-4.00222	1.47989e-10	1.28898e-08		>XP_001702467 predicted protein [Chlamydomonas reinhardtii].
g7549.t1	339.694	583.075	96.3128	-6.05397	-2.59788	1.72331e-10	1.48451e-08	nucleoside diphosphate kinase 2	>XP_002955131 hypothetical protein VOLCADRAFT_106657 [Volvox carteri f. nagariensis].
Cre03.g164600.t1.2	854.561	1464.39	244.733	-5.98362	-2.58102	2.02132e-10	1.71263e-08	H(+)-ATPase 9	>XP_001703372 plasma membrane hydrogen ATPase [Chlamydomonas reinhardtii].	P-type ATPase (P-ATPase) superfamily.	3.A.3.3.2
g11998.t1	331.059	564.996	97.121	-5.81745	-2.54039	2.98198e-10	2.44772e-08
Cre07.g346950.t1.3	103.01	177.36	28.6589	-6.18866	-2.62963	4.36851e-10	3.54868e-08
Cre06.g293100.t1.2	32.0951	58.3079	5.88222	-9.91257	-3.30926	5.18418e-10	4.14682e-08	syntaxin of plants 61	>XP_001701574 Qc-SNARE SYP6-like protein [Chlamydomonas reinhardtii].
g11700.t1	1464.79	2445.12	484.468	-5.04702	-2.33543	5.30876e-10	4.21522e-08	Phosphoglycerate kinase family protein	>XP_001699523 phosphoglycerate kinase [Chlamydomonas reinhardtii].
Cre16.g693450.t1.3	89.0074	154.389	23.6259	-6.53474	-2.70813	1.28308e-09	9.62497e-08
g8573.t1	16.3193	31.2648	1.37387	-22.7568	-4.50823	1.66209e-09	1.21084e-07	carotenoid cleavage dioxygenase 8	>XP_001696046 hypothetical protein CHLREDRAFT_175612 [Chlamydomonas reinhardtii].
Cre08.g362100.t1.3	57.649	100.166	15.132	-6.61946	-2.72671	1.88159e-09	1.34701e-07		>XP_001696012 flagellar associated protein [Chlamydomonas reinhardtii].
Cre02.g099850.t1.3	75.021	127.906	22.1364	-5.77807	-2.53059	2.0654e-09	1.46522e-07	pyruvate dehydrogenase E1 alpha	>XP_002950542 hypothetical protein VOLCADRAFT_104783 [Volvox carteri f. nagariensis].
Cre17.g724200.t1.2	63.0062	107.599	18.4132	-5.84358	-2.54685	2.49044e-09	1.74309e-07	RNA recognition motif (RRM)-containing protein
Cre07.g316850.t1.2	48.7318	84.2178	13.2458	-6.35808	-2.66859	2.52258e-09	1.75774e-07	Minichromosome maintenance (MCM2/3/5) family protein	>XP_002954315 minichromosome maintenance protein 4 [Volvox carteri f. nagariensis].
Cre09.g387600.t1.2	109.042	186.359	31.7255	-5.8741	-2.55437	2.90618e-09	1.99838e-07
Cre13.g564950.t1.2	19.2849	36.0152	2.55448	-14.0989	-3.81751	3.43918e-09	2.31414e-07	Ribosomal protein S5/Elongation factor G/III/V family protein	>XP_002947572 hypothetical protein VOLCADRAFT_56931, partial [Volvox carteri f. nagariensis].
Cre08.g379800.t1.2	9.73157	19.3181	0.145002	-133.227	-7.05774	3.4914e-09	2.33924e-07		>XP_001694349 hypothetical protein CHLREDRAFT_173804 [Chlamydomonas reinhardtii].
g9614.t1	210.874	351.786	69.9619	-5.02825	-2.33006	3.93955e-09	2.59948e-07	GDP dissociation inhibitor family protein / Rab GTPase activator family protein	>XP_001694920 rab GDP dissociation inhibitor protein [Chlamydomonas reinhardtii].
Cre03.g184250.t1.2	22.3742	42.3581	2.39035	-17.7205	-4.14735	3.94614e-09	2.59948e-07
Cre14.g609850.t1.2	14.1855	27.2197	1.15124	-23.6437	-4.56338	4.6811e-09	3.05793e-07
Cre09.g416850.t1.2	31.3126	55.8816	6.74371	-8.28647	-3.05076	4.93537e-09	3.21065e-07		>XP_001696758 hypothetical protein CHLREDRAFT_150094, partial [Chlamydomonas reinhardtii].
Cre07.g334150.t1.3	57.6311	111.877	3.38488	-33.0521	-5.04667	5.20128e-09	3.34837e-07		>EGD78209 hypothetical protein PTSG_09083 [Salpingoeca sp. ATCC 50818].
g11524.t1	116.198	229.822	2.57349	-89.3038	-6.48065	5.46093e-09	3.49455e-07	Calcium-dependent lipid-binding (CaLB domain) family protein	>XP_001698831 hypothetical protein CHLREDRAFT_193343 [Chlamydomonas reinhardtii].
g11529.t1	104.707	209.047	0.367623	-568.644	-9.15138	6.06871e-09	3.85203e-07	Calcium-dependent lipid-binding (CaLB domain) family protein	>XP_001698776 hypothetical protein CHLREDRAFT_185219 [Chlamydomonas reinhardtii].
g18368.t1	171.967	328.085	15.8483	-20.7016	-4.37167	8.76681e-09	5.47594e-07		>XP_001697707 hypothetical protein CHLREDRAFT_192728 [Chlamydomonas reinhardtii].
Cre03.g158900.t1.2	859.675	1417.57	301.781	-4.69735	-2.23185	8.91575e-09	5.54687e-07	2-oxoacid dehydrogenases acyltransferase family protein	>XP_002950074 dihydrolipoamide acetyltransferase [Volvox carteri f. nagariensis].
Cre10.g447800.t1.2	53.7989	92.1863	15.4115	-5.98164	-2.58054	1.50865e-08	8.92549e-07		>XP_001698480 hypothetical protein CHLREDRAFT_134715 [Chlamydomonas reinhardtii].
Cre01.g008450.t1.2	22.1233	39.7176	4.52895	-8.7697	-3.13253	1.56796e-08	9.20693e-07		>XP_002955367 hypothetical protein VOLCADRAFT_119034 [Volvox carteri f. nagariensis].
Cre05.g234150.t1.3	15.9621	31.1889	0.735246	-42.4196	-5.40666	2.48405e-08	1.40596e-06		>XP_001702187 hypothetical protein CHLREDRAFT_194715 [Chlamydomonas reinhardtii].
Cre13.g588800.t1.2	46.7294	81.3937	12.0651	-6.74624	-2.75408	2.53881e-08	1.43178e-06		>XP_001693891 hypothetical protein CHLREDRAFT_205678 [Chlamydomonas reinhardtii].
g1103.t1	44.0813	77.8614	10.3011	-7.55854	-2.91811	2.73435e-08	1.53653e-06
Cre03.g161081.t1.1	73.3225	122.98	23.6654	-5.19661	-2.37757	3.1012e-08	1.72414e-06		>XP_001697490 predicted protein [Chlamydomonas reinhardtii].
Cre12.g549300.t1.2	110.268	181.472	39.0645	-4.64545	-2.21582	3.93904e-08	2.15931e-06	gamma tonoplast intrinsic protein	>XP_001694120 aquaporin, glycerol transport activity [Chlamydomonas reinhardtii].	major intrinsic protein (MIP) family.	1.A.8.11.1
Cre03.g204450.t1.2	883.684	1438.4	328.966	-4.37249	-2.12845	4.86594e-08	2.63063e-06		>XP_001693192 predicted protein [Chlamydomonas reinhardtii].
Cre07.g339250.t1.2	118.235	196.269	40.2008	-4.88223	-2.28754	8.61524e-08	4.44309e-06	decapping 1	>XP_001692506 predicted protein, partial [Chlamydomonas reinhardtii].
Cre12.g537000.t1.2	53.427	89.6321	17.2219	-5.20455	-2.37977	9.51735e-08	4.86036e-06	endoplasmic reticulum auxin binding protein 1	>XP_001692979 predicted protein [Chlamydomonas reinhardtii].
Cre12.g541400.t1.2	18.6672	33.7063	3.62811	-9.29032	-3.21573	1.07415e-07	5.39759e-06		>XP_001693913 predicted protein [Chlamydomonas reinhardtii].
g2973.t1	155.952	250.821	61.0826	-4.10627	-2.03783	1.08893e-07	5.4544e-06		>XP_001695603 hypothetical protein CHLREDRAFT_205992 [Chlamydomonas reinhardtii].
Cre06.g306150.t1.3	32.8644	57.5236	8.20518	-7.01065	-2.80955	1.11574e-07	5.57086e-06		>XP_001691234 hypothetical protein CHLREDRAFT_144901 [Chlamydomonas reinhardtii].
Cre12.g515400.t1.3	9.95201	19.1204	0.783622	-24.4	-4.60881	1.18509e-07	5.89838e-06
Cre08.g382450.t1.2	44.6438	76.4658	12.8219	-5.9637	-2.57621	1.58529e-07	7.624e-06		>XP_001694325 predicted protein, partial [Chlamydomonas reinhardtii].
Cre10.g458800.t1.2	175.995	291.28	60.7103	-4.79788	-2.2624	1.62058e-07	7.73702e-06		>XP_001698391 hypothetical protein CHLREDRAFT_187729 [Chlamydomonas reinhardtii].
g15615.t1	93.8358	150.894	36.7774	-4.10291	-2.03665	2.0999e-07	9.7403e-06	sulfite reductase	>XP_001699304 ferredoxin-sulfite reductase [Chlamydomonas reinhardtii].
Cre17.g730100.t1.3	14.1018	26.046	2.15761	-12.0717	-3.59355	2.74628e-07	1.25164e-05	Peptidase M50 family protein	>XP_001701516 intramembrane metalloprotease [Chlamydomonas reinhardtii].
g12219.t1	33.2197	56.8808	9.5587	-5.95068	-2.57306	3.37924e-07	1.50084e-05		>BAM80470 hypothetical protein, conserved [Cyanidioschyzon merolae strain 10D].
g7247.t1	111.62	180.594	42.6465	-4.23468	-2.08225	3.81177e-07	1.66465e-05		>XP_001700960 hypothetical protein CHLREDRAFT_142653 [Chlamydomonas reinhardtii].
Cre12.g525050.t1.3	84.0914	137.733	30.4498	-4.52329	-2.17737	4.01614e-07	1.73937e-05	structural maintenance of chromosomes 6A	>XP_001696897 structural maintenance of chromosomes protein 6A [Chlamydomonas reinhardtii].
g4546.t1	275.39	442.557	108.223	-4.08932	-2.03186	4.07217e-07	1.75878e-05		>XP_001701278 formate nitrite transporter [Chlamydomonas reinhardtii].	formate-nitrite transporter (FNT) family.	2.A.44.2.1
g1431.t1	634	1023.77	244.231	-4.19182	-2.06758	4.37855e-07	1.87049e-05		>XP_001701663 hypothetical protein CHLREDRAFT_166206 [Chlamydomonas reinhardtii].
g2880.t1	26.0373	45.5537	6.52096	-6.98573	-2.80441	4.42001e-07	1.88307e-05	PEP1 receptor 1	>XP_001695749 hypothetical protein CHLREDRAFT_175296 [Chlamydomonas reinhardtii].
Cre07.g352800.t1.2	22.7304	39.6943	5.76659	-6.8835	-2.78314	4.73947e-07	2.00825e-05	RNAligase
Cre12.g520050.t1.2	42.6729	79.9658	5.37996	-14.8636	-3.89372	5.05388e-07	2.10731e-05		>XP_001697064 hypothetical protein CHLREDRAFT_184938 [Chlamydomonas reinhardtii].
Cre17.g707137.t1.2	73.3608	142.736	3.98562	-35.8128	-5.1624	6.42198e-07	2.62197e-05		>XP_001691555 predicted protein, partial [Chlamydomonas reinhardtii].
Cre07.g326600.t1.2	22.9033	39.9243	5.88234	-6.78714	-2.7628	6.88135e-07	2.79497e-05	PDI-like 2-2	>XP_002958927 hypothetical protein VOLCADRAFT_108380 [Volvox carteri f. nagariensis].
Cre10.g464100.t1.2	57.9074	96.6373	19.1775	-5.0391	-2.33317	7.16282e-07	2.8943e-05	NPK1-related protein kinase 2	>XP_002949883 hypothetical protein VOLCADRAFT_104524 [Volvox carteri f. nagariensis].
Cre03.g187300.t1.2	17.8464	32.2287	3.4641	-9.30364	-3.2178	7.52629e-07	3.02557e-05		>XP_001692013 predicted protein, partial [Chlamydomonas reinhardtii].
Cre12.g541550.t1.2	44.0426	71.9276	16.1575	-4.45164	-2.15434	8.15055e-07	3.24326e-05		>XP_001693913 predicted protein [Chlamydomonas reinhardtii].
g11523.t1	34.4954	68.5748	0.415999	-164.844	-7.36495	8.37863e-07	3.32557e-05	Calcium-dependent lipid-binding (CaLB domain) family protein	>XP_001698778 hypothetical protein CHLREDRAFT_193344 [Chlamydomonas reinhardtii].
Cre02.g115950.t1.2	46.7837	80.1876	13.3798	-5.99318	-2.58332	8.53e-07	3.36013e-05		>XP_001699876 hypothetical protein CHLREDRAFT_141622 [Chlamydomonas reinhardtii].
Cre06.g275550.t1.3	43.1125	72.4846	13.7405	-5.27525	-2.39924	9.13354e-07	3.57989e-05	RWP-RK domain-containing protein	>XP_001696177 RWP-RK transcription factor [Chlamydomonas reinhardtii].
Cre14.g609450.t1.2	38.2263	70.8793	5.57333	-12.7176	-3.66875	9.49485e-07	3.6938e-05	Protein of unknown function (DUF506)	>XP_001701363 predicted PWR protein [Chlamydomonas reinhardtii].
Cre11.g467900.t1.2	25.6871	44.389	6.98521	-6.35471	-2.66783	1.02991e-06	3.97706e-05	S-adenosyl-L-methionine-dependent methyltransferases superfamily protein	>XP_001696756 O-methyltransferase [Chlamydomonas reinhardtii].
Cre06.g283950.t1.2	2100.98	3245.01	956.945	-3.39101	-1.76171	1.05695e-06	4.06147e-05	photosystem II light harvesting complex gene 2.1	>XP_001695344 chloropyll a-b binding protein of LHCII [Chlamydomonas reinhardtii].	plant photosystem I supercomplex (PSI) family.	5.B.4.1.1
g468.t1	45.124	75.2524	14.9957	-5.01827	-2.32719	1.16639e-06	4.43852e-05
Cre17.g700000.t1.2	60.785	99.4555	22.1144	-4.49731	-2.16906	1.2517e-06	4.7287e-05		>XP_001691776 predicted protein [Chlamydomonas reinhardtii].
Cre17.g721500.t1.2	225.978	355.935	96.0209	-3.70685	-1.89019	1.30527e-06	4.90742e-05	UDP-Glycosyltransferase superfamily protein	>XP_001697117 granule-bound starch synthase I [Chlamydomonas reinhardtii].
Cre12.g549350.t1.2	192.762	308.417	77.108	-3.9998	-1.99993	1.31507e-06	4.93246e-05		>XP_001693995 predicted protein [Chlamydomonas reinhardtii].
Cre16.g652850.t1.2	45.1031	75.4988	14.7074	-5.13339	-2.35991	1.33466e-06	4.994e-05	Nucleotide-diphospho-sugar transferases superfamily protein	>XP_001698146 dolichol-phosphate glucosyltransferase [Chlamydomonas reinhardtii].
Cre16.g694000.t1.2	15.5509	27.919	3.18286	-8.77167	-3.13285	1.37983e-06	5.07815e-05		>XP_001699309 hypothetical protein CHLREDRAFT_193733, partial [Chlamydomonas reinhardtii].
Cre01.g001100.t1.2	80.7413	128.616	32.8667	-3.91326	-1.96837	1.46508e-06	5.32937e-05
Cre11.g468050.t1.2	41.1628	69.8169	12.5086	-5.58153	-2.48066	1.58005e-06	5.66864e-05	plastid transcriptionally active 4	>XP_002949072 hypothetical protein VOLCADRAFT_117015 [Volvox carteri f. nagariensis].
Cre13.g602650.t1.2	119.346	190.703	47.9888	-3.9739	-1.99056	1.64439e-06	5.88602e-05	Rhodanese/Cell cycle control phosphatase superfamily protein	>EFN56983 hypothetical protein CHLNCDRAFT_143586 [Chlorella variabilis].
Cre06.g254600.t1.3	21.4058	37.7716	5.03998	-7.4944	-2.90581	1.66162e-06	5.93416e-05		>XP_002956429 hypothetical protein VOLCADRAFT_107208 [Volvox carteri f. nagariensis].
Cre16.g648750.t1.3	71.2359	120.245	22.2268	-5.40991	-2.4356	1.79407e-06	6.34932e-05	Telomerase activating protein Est1
g13808.t1	49.2579	80.4517	18.064	-4.45371	-2.15501	1.81089e-06	6.38003e-05	photosystem I P subunit	>XP_001703033 predicted protein [Chlamydomonas reinhardtii].
Cre07.g338000.t1.2	33.2229	55.1162	11.3297	-4.86476	-2.28237	1.88272e-06	6.58866e-05	minichromosome maintenance (MCM2/3/5) family protein	>XP_001700080 minichromosome maintenance protein 2 [Chlamydomonas reinhardtii].
Cre17.g737300.t1.3	21.1815	36.907	5.45598	-6.7645	-2.75798	2.35662e-06	8.12024e-05		>XP_001699619 hypothetical protein CHLREDRAFT_96004, partial [Chlamydomonas reinhardtii].
Cre10.g425850.t1.2	22.0436	37.7025	6.38473	-5.90511	-2.56196	2.56831e-06	8.71556e-05
Cre02.g079250.t1.3	21.4816	36.5785	6.38473	-5.72906	-2.5183	2.94325e-06	9.83885e-05	centromere protein C	>XP_001701669 predicted protein [Chlamydomonas reinhardtii].
Cre10.g456100.t1.2	81.1719	129.652	32.692	-3.96585	-1.98763	2.96355e-06	9.88564e-05	flavodoxin-like quinone reductase 1	>XP_001698552 flagellar flavodoxin [Chlamydomonas reinhardtii].
Cre07.g352750.t1.2	87.4476	158.514	16.3816	-9.67631	-3.27446	3.01819e-06	0.000100041	magnesium transporter 2	>XP_002951682 Mg2+ transporter protein [Volvox carteri f. nagariensis].	CorA metal ion transporter (MIT) family.	1.A.35.5.2
Cre04.g228750.t1.1	39.4334	65.0207	13.846	-4.69598	-2.23143	3.33025e-06	0.000107875		>XP_001692239 hypothetical protein CHLREDRAFT_189490 [Chlamydomonas reinhardtii].
g5619.t1	337.606	542.652	132.56	-4.09363	-2.03338	3.37212e-06	0.000108559	Homocysteine S-methyltransferase family protein	>XP_002947125 vitamin B12 dependent methionine synthase [Volvox carteri f. nagariensis].
Cre13.g606850.t1.2	17.4031	30.6363	4.16997	-7.34688	-2.87713	3.50995e-06	0.000112534	Transducin family protein / WD-40 repeat family protein	>XP_002950809 hypothetical protein VOLCADRAFT_91388 [Volvox carteri f. nagariensis].
Cre17.g698000.t1.2	818.136	1251.58	384.691	-3.25347	-1.70198	3.5455e-06	0.00011334	ATP synthase alpha/beta family protein	>XP_001691632 beta subunit of mitochondrial ATP synthase [Chlamydomonas reinhardtii].	H+- or Na+-translocating F-type, V-type and A-type ATPase (F-ATPase) superfamily.	3.A.2.1.3
g6298.t1	71.8911	114.95	28.8326	-3.9868	-1.99523	3.71485e-06	0.000117897		>XP_001698017 hypothetical protein CHLREDRAFT_192990 [Chlamydomonas reinhardtii].
Cre10.g442750.t1.2	9.97308	18.4565	1.48962	-12.3901	-3.63111	3.93944e-06	0.000124271	RING/U-box superfamily protein	>XP_001690515 hypothetical protein CHLREDRAFT_161785 [Chlamydomonas reinhardtii].
Cre09.g409750.t1.3	49.4427	79.4674	19.4179	-4.09248	-2.03298	4.10001e-06	0.000129076	cation exchanger 2	>XP_001696687 cation antiporter, membrane protein, partial [Chlamydomonas reinhardtii].	Ca2+:cation antiporter (CaCA) family.	2.A.19.2.6
Cre03.g158750.t1.1	284.767	445.335	124.199	-3.58567	-1.84224	4.26136e-06	0.000133087	P-loop containing nucleoside triphosphate hydrolases superfamily protein	>XP_001697438 predicted protein [Chlamydomonas reinhardtii].	nuclear mRNA exporter (mRNA-E) family.	3.A.18.1.1
Cre02.g089500.t1.2	21.5647	37.5972	5.53213	-6.79615	-2.76472	4.81474e-06	0.000149476		>XP_001701961 predicted protein [Chlamydomonas reinhardtii].
g148.t1	42.0514	68.8448	15.258	-4.51204	-2.17378	4.88114e-06	0.000151238	Translation elongation factor EFG/EF2 protein	>XP_001702118 peptide-chain release factor [Chlamydomonas reinhardtii].
Cre09.g395800.t1.2	76.6711	124.462	28.88	-4.30964	-2.10757	5.57549e-06	0.000170063		>XP_001694495 predicted protein [Chlamydomonas reinhardtii].
Cre04.g224200.t1.2	25.322	43.486	7.15799	-6.07517	-2.60292	5.63518e-06	0.000171147		>XP_001702011 predicted protein [Chlamydomonas reinhardtii].
g470.t1	15.6278	27.84	3.4156	-8.15085	-3.02695	5.76347e-06	0.000174103	FUMARASE 2	>XP_001689951 fumarate hydratase [Chlamydomonas reinhardtii].
Cre02.g082500.t1.3	1050.23	1586.02	514.436	-3.08302	-1.62435	6.19501e-06	0.00018545	photosystem I reaction center subunit PSI-N, chloroplast, putative / PSI-N, putative (PSAN)	>AF323725_1 PsaN precursor [Chlamydomonas reinhardtii].
g2761.t1	36.262	58.3117	14.2122	-4.10294	-2.03666	7.01031e-06	0.00020582	cytochrome P450, family 97, subfamily A, polypeptide 3	>XP_001700492 cytochrome P450, carotenoid hydroxylase [Chlamydomonas reinhardtii].
g3686.t1	14.375	25.3152	3.43485	-7.37008	-2.88168	7.96917e-06	0.000230518	WD-40 repeat family protein / small nuclear ribonucleoprotein Prp4p-related	>XP_001703421 hypothetical protein CHLREDRAFT_168908 [Chlamydomonas reinhardtii].
Cre15.g634850.t1.3	14.92	25.8633	3.97672	-6.50368	-2.70126	8.44099e-06	0.000242377
Cre09.g406600.t1.1	26.3587	43.6612	9.05631	-4.82108	-2.26936	8.90923e-06	0.000253041		>XP_001697678 hypothetical protein CHLREDRAFT_192833 [Chlamydomonas reinhardtii].
g4025.t1	39.4403	65.0553	13.8254	-4.70548	-2.23434	9.10492e-06	0.000257666		>XP_001693268 predicted protein [Chlamydomonas reinhardtii].
Cre12.g486100.t1.2	362.407	552.777	172.038	-3.21311	-1.68397	9.22593e-06	0.00026062	nuclear encoded CLP protease 5	>XP_001690891 active subunit of the chloroplast ClpP complex [Chlamydomonas reinhardtii].
g16703.t1	26.3802	46.4431	6.31735	-7.35168	-2.87807	9.43227e-06	0.000265765	P-loop containing nucleoside triphosphate hydrolases superfamily protein	>XP_001695903 hypothetical protein CHLREDRAFT_158299 [Chlamydomonas reinhardtii].
Cre13.g565850.t1.3	169.43	264.093	74.7664	-3.53224	-1.82058	9.73368e-06	0.000272508	Coatomer, alpha subunit	>XP_001693686 alpha-COP [Chlamydomonas reinhardtii].
Cre17.g697500.t1.3	27.2074	45.6499	8.76497	-5.20822	-2.38079	1.04601e-05	0.000289229		>XP_001691800 EF-hand and p25-alpha domain containg protein [Chlamydomonas reinhardtii].
g11467.t1	16.4533	29.037	3.86973	-7.50361	-2.90759	1.21621e-05	0.000332771		>XP_001701423 predicted protein, partial [Chlamydomonas reinhardtii].
Cre05.g248450.t1.2	37.858	62.6056	13.1104	-4.77526	-2.25558	1.23524e-05	0.000337388	beta carbonic anhydrase 6	>AAC49888 beta-carbonic anhydrase [Chlamydomonas reinhardtii].
Cre12.g483950.t1.2	1254.54	1913.57	595.513	-3.21332	-1.68407	1.33328e-05	0.000361647	Lactate/malate dehydrogenase family protein	>XP_001703167 malate dehydrogenase [Chlamydomonas reinhardtii].
g395.t1	78.6946	123.477	33.9125	-3.64104	-1.86435	1.35466e-05	0.000366179	casein kinase II beta chain 2	>XP_001689921 casein kinase 2 beta chain, CK2B, partial [Chlamydomonas reinhardtii].
Cre12.g513950.t1.2	74.0693	116.598	31.5409	-3.69671	-1.88624	1.3904e-05	0.000375192	non-intrinsic ABC protein 6	>XP_001702979 iron-sulfur cluster assembly protein [Chlamydomonas reinhardtii].
Cre02.g143450.t1.2	15.6904	27.2491	4.13184	-6.5949	-2.72135	1.44988e-05	0.0003899
Cre03.g149250.t1.2	101.685	158.275	45.0938	-3.50992	-1.81144	1.59423e-05	0.000422916	Phosphoenolpyruvate carboxylase family protein	>XP_001695570 hypothetical protein CHLREDRAFT_104431, partial [Chlamydomonas reinhardtii].
Cre14.g612150.t1.3	51.6399	82.9027	20.377	-4.06845	-2.02448	1.61802e-05	0.000428502	Nucleotidyltransferase family protein	>XP_001699029 hypothetical protein CHLREDRAFT_177575, partial [Chlamydomonas reinhardtii].
Cre02.g080150.t1.3	202.9	357.148	48.6514	-7.34096	-2.87597	1.67533e-05	0.000441504		>XP_002949585 hypothetical protein VOLCADRAFT_89975 [Volvox carteri f. nagariensis].
Cre10.g460150.t1.2	13.8641	25.1166	2.6115	-9.61772	-3.26569	1.74664e-05	0.000459459	ERD (early-responsive to dehydration stress) family protein	>XP_001698593 ERD4-related membrane protein [Chlamydomonas reinhardtii].
g12807.t1	4.27257	8.54515	0	0	#NAME?	1.75921e-05	0.000461991		>XP_001697068 hypothetical protein CHLREDRAFT_176285 [Chlamydomonas reinhardtii].
Cre02.g108300.t1.3	55.7476	89.5892	21.9061	-4.08969	-2.03199	1.89896e-05	0.000495373		>XP_001699954 hypothetical protein CHLREDRAFT_186820 [Chlamydomonas reinhardtii].
Cre10.g455750.t1.3	22.4476	38.3656	6.52961	-5.87564	-2.55475	2.08183e-05	0.000537708	DNA/RNA helicase protein
Cre12.g505050.t1.2	265.673	409.642	121.704	-3.36588	-1.75098	2.08892e-05	0.000538652		>XP_001690999 hypothetical protein CHLREDRAFT_188603 [Chlamydomonas reinhardtii].
Cre03.g184150.t1.2	35.6946	58.0485	13.3406	-4.35128	-2.12144	2.24455e-05	0.000575001	Acyl-CoA N-acyltransferases (NAT) superfamily protein	>XP_001691820 hypothetical protein CHLREDRAFT_115555 [Chlamydomonas reinhardtii].
Cre03.g185500.t1.1	73.7401	118.428	29.0525	-4.07633	-2.02727	2.25301e-05	0.000576228	Phosphoglycerate mutase-like family protein	>XP_001691833 acid phosphatase, partial [Chlamydomonas reinhardtii].
Cre02.g080450.t1.2	31.616	50.5755	12.6565	-3.99601	-1.99856	2.33244e-05	0.000592675		>XP_002954848 hypothetical protein VOLCADRAFT_118877 [Volvox carteri f. nagariensis].
Cre06.g295450.t1.2	46.167	73.0133	19.3208	-3.77901	-1.91801	2.49488e-05	0.000627606	hydroxypyruvate reductase	>XP_001691480 hydroxypyruvate reductase [Chlamydomonas reinhardtii].
Cre12.g516950.t1.2	18.4253	31.2392	5.61135	-5.56716	-2.47694	2.50194e-05	0.000627606		>BAF94334 centriole protein [Chlamydomonas reinhardtii].
Cre17.g730550.t1.2	8.69984	15.8324	1.56724	-10.1021	-3.33658	2.49949e-05	0.000627606	glycosyl hydrolase 9C3	>XP_001701546 predicted protein, partial [Chlamydomonas reinhardtii].
Cre10.g420900.t1.2	8.8367	16.1061	1.56724	-10.2767	-3.36131	2.52923e-05	0.000633369	DEA(D/H)-box RNA helicase family protein	>XP_001702606 predicted protein, partial [Chlamydomonas reinhardtii].	nuclear mRNA exporter (mRNA-E) family.	3.A.18.1.1
Cre11.g483250.t1.3	122.473	193.248	51.6982	-3.73801	-1.90227	2.62277e-05	0.000654773
Cre13.g570450.t1.3	11.5187	19.8633	3.17422	-6.25769	-2.64563	2.71449e-05	0.00067232
Cre10.g436500.t1.2	93.1521	144.65	41.6546	-3.4726	-1.79602	2.77411e-05	0.000683085	Survival protein SurE-like phosphatase/nucleotidase	>XP_001690585 hypothetical protein CHLREDRAFT_144281, partial [Chlamydomonas reinhardtii].
g6356.t1	18.9921	32.4505	5.53373	-5.86413	-2.55192	2.77539e-05	0.000683085
Cre05.g239750.t1.2	13.2713	25.74	0.802628	-32.0697	-5.00314	2.80012e-05	0.000688091		>XP_001697712 hypothetical protein CHLREDRAFT_192731 [Chlamydomonas reinhardtii].
Cre04.g226850.t1.2	427.164	644.155	210.174	-3.06487	-1.61583	2.80828e-05	0.000689019	aspartic proteinase A1	>CAE18153 aspartic proteinase [Chlamydomonas reinhardtii].
Cre11.g482700.t1.2	20.1612	33.4822	6.84021	-4.8949	-2.29128	2.81448e-05	0.000689189		>XP_002956817 hypothetical protein VOLCADRAFT_107419 [Volvox carteri f. nagariensis].
g6348.t1	21.6838	37.04	6.32759	-5.85374	-2.54936	2.81777e-05	0.000689189
Cre01.g049550.t1.2	21.7704	36.1792	7.3616	-4.91458	-2.29707	2.90603e-05	0.000706368	Pleckstrin homology (PH) domain superfamily protein	>XP_002948527 hypothetical protein VOLCADRAFT_88974 [Volvox carteri f. nagariensis].
g6578.t1	34.5891	55.8552	13.323	-4.19238	-2.06777	2.91866e-05	0.000708339
g1887.t1	106.369	182.206	30.532	-5.96771	-2.57718	2.95756e-05	0.000715565		>XP_001701184 hypothetical protein CHLREDRAFT_96122, partial [Chlamydomonas reinhardtii].
g9836.t1	11.7647	21.246	2.28348	-9.30419	-3.21788	2.95587e-05	0.000715565		>XP_001694784 predicted protein [Chlamydomonas reinhardtii].
Cre07.g321800.t1.2	6.77522	12.9602	0.590244	-21.9574	-4.45663	3.15018e-05	0.000752874		>XP_001700856 hypothetical protein CHLREDRAFT_134489 [Chlamydomonas reinhardtii].
Cre07.g313250.t1.2	75.3547	119.363	31.3462	-3.8079	-1.92899	3.1851e-05	0.000759583	pleiotropic drug resistance 6	>XP_002954204 hypothetical protein VOLCADRAFT_95021 [Volvox carteri f. nagariensis].	ATP-binding cassette (ABC) superfamily.	3.A.1.204.2
Cre10.g450200.t1.2	27.3892	45.722	9.05631	-5.04864	-2.33589	3.18794e-05	0.000759583		>XP_001698506 predicted protein, partial [Chlamydomonas reinhardtii].
Cre03.g180300.t1.2	41.2688	67.2801	15.2575	-4.40963	-2.14066	3.23458e-05	0.00076836	P450 reductase 2	>XP_001703247 sulfite reductase [Chlamydomonas reinhardtii].
g18025.t1	189.799	290.265	89.3322	-3.24928	-1.70012	3.2933e-05	0.000775262	MAP kinase 15	>XP_001703601 mitogen-activated protein kinase 4, partial [Chlamydomonas reinhardtii].
Cre03.g148000.t1.2	43.836	68.2222	19.4498	-3.5076	-1.81048	3.32311e-05	0.000779936		>XP_001695697 hypothetical protein CHLREDRAFT_191960 [Chlamydomonas reinhardtii].
Cre02.g113200.t1.3	630.563	924.479	336.647	-2.74613	-1.4574	3.39076e-05	0.000793438	glutamine synthetase 1.3	>XP_001699902 glutamine synthetase [Chlamydomonas reinhardtii].
g11637.t1	389.307	612.994	165.62	-3.70122	-1.888	3.42299e-05	0.000799787	ATPase, F1 complex, delta/epsilon subunit	>XP_001698736 mitochondrial F1F0 ATP synthase, delta subunit [Chlamydomonas reinhardtii].
Cre13.g605800.t1.3	22.6672	37.2153	8.11917	-4.58363	-2.19649	3.5134e-05	0.000819689	Helicase/SANT-associated, DNA binding protein	>XP_001699136 hypothetical protein CHLREDRAFT_193520 [Chlamydomonas reinhardtii].
g18018.t1	75.5722	119.788	31.3567	-3.82017	-1.93364	3.52209e-05	0.000820496		>XP_001703613 predicted protein, partial [Chlamydomonas reinhardtii].
g13222.t1	20.143	34.0844	6.20159	-5.49607	-2.4584	3.57987e-05	0.000830254	chromatin remodeling 4
Cre04.g223050.t1.2	101.614	160.291	42.936	-3.73325	-1.90043	3.58635e-05	0.000830529	alpha carbonic anhydrase 4
Cre16.g657550.t1.2	41.027	64.3282	17.7259	-3.62906	-1.8596	3.88975e-05	0.0008955	Vacuolar import/degradation, Vid27-related protein	>XP_001697908 VID72-domain protein [Chlamydomonas reinhardtii].
g949.t1	8.00501	15.197	0.812991	-18.6927	-4.22441	4.06983e-05	0.000930128
Cre11.g483450.t1.3	5.46539	10.3888	0.541994	-19.1677	-4.2606	4.63518e-05	0.0010326		>XP_001697413 predicted protein [Chlamydomonas reinhardtii].
g9797.t1	28.232	44.998	11.4659	-3.9245	-1.97251	4.68274e-05	0.00104136
g6291.t1	29.1058	47.074	11.1377	-4.22656	-2.07948	4.72545e-05	0.00104937		>XP_001698019 hypothetical protein CHLREDRAFT_176850 [Chlamydomonas reinhardtii].
g5831.t1	87.7025	136.495	38.9102	-3.50794	-1.81063	4.74931e-05	0.00105318	S-adenosyl-L-methionine-dependent methyltransferases superfamily protein	>XP_001696599 hypothetical protein CHLREDRAFT_126738 [Chlamydomonas reinhardtii].
Cre01.g024900.t1.3	63.2376	100.558	25.9176	-3.87989	-1.95602	4.84747e-05	0.00107062	nucleotide binding;nucleic acid binding	>XP_002953951 hypothetical protein VOLCADRAFT_106208 [Volvox carteri f. nagariensis].
Cre01.g019200.t1.3	20.4209	34.2243	6.61759	-5.17171	-2.37064	4.88975e-05	0.00107822		>XP_001689496 predicted protein, partial [Chlamydomonas reinhardtii].
Cre17.g720250.t1.2	9428.62	14213.5	4643.74	-3.06079	-1.6139	4.92177e-05	0.00108224	light harvesting complex photosystem II	>XP_001697193 chlorophyll a-b binding protein of photosystem II [Chlamydomonas reinhardtii].
Cre07.g322300.t1.3	16.4814	28.0385	4.92423	-5.69399	-2.50944	5.04718e-05	0.00110671	RAD3-like DNA-binding helicase protein	>XP_001700860 hypothetical protein CHLREDRAFT_113235, partial [Chlamydomonas reinhardtii].
Cre12.g532600.t1.3	20.7373	34.7311	6.74346	-5.15033	-2.36467	5.16632e-05	0.00112967	Ypt/Rab-GAP domain of gyp1p superfamily protein
Cre08.g364000.t1.3	18.3411	31.128	5.5542	-5.6044	-2.48656	5.32426e-05	0.00115936	Transducin family protein / WD-40 repeat family protein	>XP_001696112 hypothetical protein CHLREDRAFT_150171, partial [Chlamydomonas reinhardtii].
Cre16.g693300.t1.3	28.5723	46.2416	10.9031	-4.24115	-2.08446	5.52932e-05	0.00120234		>XP_001699306 hypothetical protein CHLREDRAFT_152523, partial [Chlamydomonas reinhardtii].
Cre06.g263000.t1.3	38.4126	60.929	15.8963	-3.83291	-1.93844	5.81306e-05	0.00125361		>XP_001696304 predicted protein, partial [Chlamydomonas reinhardtii].
Cre05.g248150.t1.2	26.2622	42.9935	9.5308	-4.51101	-2.17345	6.02043e-05	0.00129122	Phospholipid/glycerol acyltransferase family protein	>XP_002947104 hypothetical protein VOLCADRAFT_73089 [Volvox carteri f. nagariensis].
Cre11.g478500.t1.2	51.0769	81.4779	20.6759	-3.94072	-1.97846	6.07171e-05	0.00130044		>XP_001697371 hypothetical protein CHLREDRAFT_192869 [Chlamydomonas reinhardtii].
Cre14.g632600.t1.1	115.453	175.359	55.5476	-3.15691	-1.65851	6.44434e-05	0.00137089
g17813.t1	10.8541	18.9603	2.74786	-6.90002	-2.7866	7.08375e-05	0.00149877
Cre10.g445800.t1.3	47.8757	74.487	21.2644	-3.5029	-1.80855	7.24124e-05	0.00153003		>XP_001698281 predicted protein [Chlamydomonas reinhardtii].
g11079.t1	13.0997	22.164	4.03534	-5.49249	-2.45746	7.31962e-05	0.00154451
Cre12.g504900.t1.3	9.49969	17.0557	1.94363	-8.77518	-3.13343	7.5837e-05	0.0015938		>XP_001690999 hypothetical protein CHLREDRAFT_188603 [Chlamydomonas reinhardtii].
g5122.t1	111.637	169.007	54.2668	-3.11437	-1.63894	7.61191e-05	0.00159759		>XP_002953219 hypothetical protein VOLCADRAFT_105831 [Volvox carteri f. nagariensis].
Cre13.g568750.t1.3	43.2357	68.4658	18.0056	-3.80246	-1.92693	7.85014e-05	0.00163858	Ubiquitin system component Cue protein	>XP_002949269 hypothetical protein VOLCADRAFT_89548 [Volvox carteri f. nagariensis].
Cre16.g681850.t1.2	70.2992	116.304	24.2941	-4.78735	-2.25923	8.09204e-05	0.00168259	uridine kinase-like 5	>XP_001691897 hypothetical protein CHLREDRAFT_170716 [Chlamydomonas reinhardtii].
g9850.t1	42.2304	65.3538	19.107	-3.4204	-1.77417	8.37659e-05	0.00173485		>XP_001694707 predicted protein [Chlamydomonas reinhardtii].
Cre08.g372550.t1.1	59.6326	91.7954	27.4697	-3.3417	-1.74058	8.42579e-05	0.00174044	cyclin-dependent kinase B1;2	>XP_001701299 plant specific cyclin dependent kinase [Chlamydomonas reinhardtii].
Cre17.g725750.t1.2	71.6121	130.049	13.1751	-9.87083	-3.30317	8.4923e-05	0.00174957		>XP_001697156 hypothetical protein CHLREDRAFT_138565 [Chlamydomonas reinhardtii].
Cre11.g475900.t1.2	176.825	264.565	89.0854	-2.96979	-1.57036	8.62134e-05	0.00176456	DNAse I-like superfamily protein	>XP_001702008 protein of endonuclease / exonuclease / phosphatase family [Chlamydomonas reinhardtii].
Cre12.g512200.t1.2	19.4891	31.8859	7.0922	-4.49591	-2.16861	8.61805e-05	0.00176456	zinc induced facilitator-like 1	>XP_002948183 hypothetical protein VOLCADRAFT_103803 [Volvox carteri f. nagariensis].
Cre15.g639850.t1.2	9.6541	17.0437	2.26448	-7.52656	-2.91199	8.70652e-05	0.00177967
Cre14.g615050.t1.2	225.394	355.709	95.0787	-3.74121	-1.9035	8.76896e-05	0.0017901	3-oxo-5-alpha-steroid 4-dehydrogenase family protein
Cre02.g118600.t1.2	141.629	212.767	70.4904	-3.01839	-1.59378	9.3211e-05	0.00188806	homolog of bacterial cytokinesis Z-ring protein FTSZ 1-1	>XP_001702420 plastid division protein [Chlamydomonas reinhardtii].
Cre16.g651300.t1.2	15.4848	26.2092	4.76034	-5.50574	-2.46094	9.48279e-05	0.00191834		>XP_001698237 hypothetical protein CHLREDRAFT_151646, partial [Chlamydomonas reinhardtii].
Cre12.g505650.t1.2	178.931	272.505	85.3559	-3.19258	-1.67472	9.53317e-05	0.00192356
g9820.t1	18.5906	33.1957	3.98549	-8.32913	-3.05817	9.71632e-05	0.00195549	Zinc finger (C3HC4-type RING finger) family protein	>XP_001694780 flagellar associated protein [Chlamydomonas reinhardtii].
Cre12.g503000.t1.2	61.6688	94.6112	28.7263	-3.29354	-1.71964	9.78372e-05	0.00196401	phosphate starvation-induced gene 3	>XP_001690795 glycerol-3-phosphate permease-like protein [Chlamydomonas reinhardtii].	major facilitator superfamily (MFS).	2.A.1.4.7
Cre08.g384800.t1.2	54.8809	84.0577	25.704	-3.27022	-1.70939	9.989e-05	0.00199754	alpha/beta-Hydrolases superfamily protein	>XP_001694303 predicted protein, partial [Chlamydomonas reinhardtii].
Cre02.g086650.t1.2	11.8396	21.0866	2.59262	-8.13331	-3.02384	9.97937e-05	0.00199754	structural maintenance of chromosomes 2	>XP_001701741 structural maintenance of chromosomes protein 2, partial [Chlamydomonas reinhardtii].
g11753.t1	881.189	1307.82	454.562	-2.87709	-1.52461	0.0001008	0.00201317		>AAY56335 hydroxyproline-rich glycoprotein GAS31 precursor [Chlamydomonas reinhardtii].
Cre01.g027150.t1.3	14.7448	24.3806	5.10896	-4.77213	-2.25463	0.000112084	0.0022167	DEAD/DEAH box helicase, putative	>EMJ28235 hypothetical protein PRUPE_ppa000444mg [Prunus persica].
Cre06.g262250.t1.2	101.885	147.522	56.2478	-2.62272	-1.39106	0.000114596	0.00225708	Clathrin adaptor complexes medium subunit family protein	>XP_001696311 Mu1-Adaptin [Chlamydomonas reinhardtii].
Cre13.g592150.t1.2	186.161	280.162	92.1606	-3.03993	-1.60404	0.000116833	0.00229825	P-loop containing nucleoside triphosphate hydrolases superfamily protein	>XP_001692956 pre-mRNA-splicing ATP-dependent RNA helicase [Chlamydomonas reinhardtii].	nuclear mRNA exporter (mRNA-E) family.	3.A.18.1.1
Cre12.g503500.t1.1	115.066	172.051	58.081	-2.96227	-1.5667	0.000118258	0.00232338		>XP_001690984 predicted protein [Chlamydomonas reinhardtii].
Cre02.g086900.t1.2	20.3603	33.2228	7.49784	-4.43098	-2.14763	0.000118499	0.00232518	Nucleoporin autopeptidase	>XP_001701744 predicted protein, partial [Chlamydomonas reinhardtii].
Cre10.g446900.t1.2	44.6306	70.1057	19.1554	-3.65984	-1.87178	0.000122991	0.00239857	pleiotropic regulatory locus 1	>XP_001698474 predicted protein, partial [Chlamydomonas reinhardtii].
Cre16.g675300.t1.3	95.2335	151.309	39.1578	-3.86408	-1.95013	0.000128434	0.00248592	Major facilitator superfamily protein	>XP_001695835 major facilitator superfamily transporter, partial [Chlamydomonas reinhardtii].	major facilitator superfamily (MFS).	2.A.1.14.22
g9725.t1	158.585	235.128	82.0415	-2.86597	-1.51902	0.0001328	0.00256724	homolog of anti-oxidant 1	>XP_001694742 copper chaperone [Chlamydomonas reinhardtii].
Cre13.g572050.t1.3	51.5757	80.0162	23.1352	-3.45863	-1.7902	0.000141446	0.00272432	target of rapamycin
Cre17.g728100.t1.2	46.1944	70.4357	21.953	-3.20848	-1.68189	0.000147855	0.00283383	Peptidase M20/M25/M40 family protein	>XP_001697270 hypothetical protein CHLREDRAFT_105119, partial [Chlamydomonas reinhardtii].
Cre06.g264100.t1.3	64.3745	119.993	8.75595	-13.7042	-3.77654	0.000151806	0.002905		>XP_001696292 predicted protein [Chlamydomonas reinhardtii].
Cre14.g614100.t1.2	289.157	430.969	147.346	-2.92488	-1.54838	0.000153329	0.00292445	dolichyl-diphosphooligosaccharide-protein glycosyltransferase 48kDa subunit family protein	>XP_001699044 dolichyl-diphosphooligosaccharide-protein glycosyltransferase [Chlamydomonas reinhardtii].
Cre09.g409800.t1.3	8.17251	14.3618	1.98324	-7.24156	-2.8563	0.000156825	0.00297665	HD domain-containing metal-dependent phosphohydrolase family protein	>XP_002955164 hypothetical protein VOLCADRAFT_106690 [Volvox carteri f. nagariensis].
g2717.t1	30.5475	53.8388	7.25621	-7.41969	-2.89136	0.000156455	0.00297665	ARM repeat superfamily protein	>XP_001694407 hypothetical protein CHLREDRAFT_109222, partial [Chlamydomonas reinhardtii].
Cre08.g382950.t1.2	64.8768	97.2074	32.5461	-2.98676	-1.57858	0.0001582	0.00299188		>XP_001694317 predicted protein [Chlamydomonas reinhardtii].
g2757.t1	75.5068	110.95	40.064	-2.76931	-1.46953	0.000160571	0.00302939	Tubulin/FtsZ family protein	>XP_001700508 plastid division protein FtsZ2 [Chlamydomonas reinhardtii].
Cre08.g367400.t1.1	10.9019	21.0392	0.764616	-27.5161	-4.7822	0.000161956	0.00305186	chlorophyll A/B binding protein 1	>XP_001696064 stress-related chlorophyll a/b binding protein 2 [Chlamydomonas reinhardtii].
g1860.t1	87.8922	132.084	43.7009	-3.02245	-1.59572	0.000162725	0.00305532	Sodium Bile acid symporter family	>XP_002950179 hypothetical protein VOLCADRAFT_43621, partial [Volvox carteri f. nagariensis].	unknown BART superfamily-1 (UBS1) family.	2.A.93.1.1
Cre06.g306300.t1.2	1522.52	2260.4	784.638	-2.88081	-1.52648	0.000167771	0.0031388	P-loop containing nucleoside triphosphate hydrolases superfamily protein	>XP_001691232 magnesium chelatase subunit I [Chlamydomonas reinhardtii].
Cre09.g395300.t1.2	13.8601	23.1047	4.61547	-5.00592	-2.32364	0.000168821	0.00314717		>XP_001694601 predicted protein, partial [Chlamydomonas reinhardtii].
Cre07.g329700.t1.2	236.892	401.241	72.5428	-5.53109	-2.46756	0.000174163	0.00323139	regulatory particle AAA-ATPase 2A	>XP_001690446 26S proteasome regulatory subunit [Chlamydomonas reinhardtii].	endoplasmic reticular retrotranslocon (ER-RT) family.	3.A.16.1.1
Cre12.g494100.t1.3	39.6228	66.1848	13.0608	-5.06744	-2.34126	0.000184122	0.00339608	splicing factor, putative	>XP_002956915 hypothetical protein VOLCADRAFT_30174, partial [Volvox carteri f. nagariensis].
Cre12.g514750.t1.2	111.769	166.22	57.3174	-2.89999	-1.53605	0.000187236	0.00344541	Citrate synthase family protein	>XP_001702983 citrate synthase [Chlamydomonas reinhardtii].
Cre02.g076600.t1.2	43.7069	67.6771	19.7366	-3.42901	-1.77779	0.000188879	0.00347156	Peptidyl-tRNA hydrolase family protein	>XP_001701641 predicted protein [Chlamydomonas reinhardtii].
Cre02.g141050.t1.3	32.1419	53.795	10.4888	-5.1288	-2.35862	0.000190722	0.00349724	Stabilizer of iron transporter SufD / Polynucleotidyl transferase	>XP_001694840 argonaute-like protein [Chlamydomonas reinhardtii].
Cre01.g041450.t1.3	13.9149	25.5272	2.30249	-11.0868	-3.47077	0.000191766	0.00350409	protein serine/threonine phosphatases;protein kinases;catalytics;cAMP-dependent protein kinase regulators;ATP binding;protein serine/threonine phosphatases	>XP_001690154 predicted protein, partial [Chlamydomonas reinhardtii].
Cre17.g722850.t1.3	30.8383	48.7229	12.9537	-3.76131	-1.91124	0.00019479	0.00354663		>XP_001697131 hypothetical protein CHLREDRAFT_163989 [Chlamydomonas reinhardtii].
Cre08.g377700.t1.3	112.006	166.486	57.5256	-2.89412	-1.53313	0.000196432	0.00356029		>XP_001694253 hypothetical protein CHLREDRAFT_196913 [Chlamydomonas reinhardtii].
Cre17.g696650.t1.3	16.7767	27.2844	6.2691	-4.3522	-2.12174	0.000196024	0.00356029		>XP_002949009 hypothetical protein VOLCADRAFT_116982 [Volvox carteri f. nagariensis].
Cre02.g104950.t1.3	13.1451	22.3618	3.92835	-5.69242	-2.50904	0.000196307	0.00356029
g11937.t1	20.5929	34.2212	6.96461	-4.91359	-2.29678	0.000199007	0.0036028	Nucleotide-diphospho-sugar transferase family protein	>XP_002957150 hypothetical protein VOLCADRAFT_119593 [Volvox carteri f. nagariensis].
Cre10.g424700.t1.3	7.99903	14.2858	1.71224	-8.34332	-3.06062	0.00019969	0.00361101	Mitogen activated protein kinase kinase kinase-related	>XP_001702573 predicted protein [Chlamydomonas reinhardtii].
Cre17.g738100.t1.3	90.2415	140.186	40.2966	-3.47886	-1.79862	0.000202163	0.00364731		>XP_001699627 hypothetical protein CHLREDRAFT_152819, partial [Chlamydomonas reinhardtii].
Cre03.g190500.t1.2	119.559	176.721	62.3971	-2.8322	-1.50193	0.000211816	0.0038127	Glycosyl hydrolases family 31 protein	>XP_001692042 glycoside-hydrolase-like protein [Chlamydomonas reinhardtii].
Cre06.g295200.t1.2	52.609	82.4418	22.7762	-3.61964	-1.85585	0.000222766	0.00399145	cryptochrome 1 (CPH1)	>XP_001701553 cryptochrome photoreceptor [Chlamydomonas reinhardtii].
Cre07.g347150.t1.2	44.8684	68.2568	21.48	-3.17769	-1.66798	0.000226087	0.00403712		>XP_002951798 hypothetical protein VOLCADRAFT_121006 [Volvox carteri f. nagariensis].
Cre08.g375900.t1.1	35.0956	52.8914	17.2999	-3.05732	-1.61227	0.000230149	0.00410031	Eukaryotic translation initiation factor eIF2A family protein	>XP_001694385 eukaryotic initiation factor, partial [Chlamydomonas reinhardtii].
g18401.t1	2.87033	5.74066	0	0	#NAME?	0.00023815	0.00423324		>XP_002952567 hypothetical protein VOLCADRAFT_93182 [Volvox carteri f. nagariensis].
Cre09.g405950.t1.2	75.1433	113.256	37.0304	-3.05846	-1.61281	0.000244169	0.00431576		>XP_001697672 hypothetical protein CHLREDRAFT_192831 [Chlamydomonas reinhardtii].
Cre12.g490200.t1.2	49.9394	78.7727	21.1062	-3.7322	-1.90003	0.000245149	0.00432821	Protein kinase superfamily protein	>XP_001690935 predicted protein, partial [Chlamydomonas reinhardtii].
Cre16.g661900.t1.3	32.6842	49.8132	15.5552	-3.20235	-1.67913	0.000255502	0.00448574	P-loop containing nucleoside triphosphate hydrolases superfamily protein		nuclear mRNA exporter (mRNA-E) family.	3.A.18.1.1
Cre12.g532200.t1.2	23.73	36.8379	10.6221	-3.46805	-1.79412	0.000256579	0.00449458	alpha/beta-Hydrolases superfamily protein	>XP_001693022 alpha/beta hydrolase [Chlamydomonas reinhardtii].
g8145.t1	29.16	44.5033	13.8167	-3.22099	-1.6875	0.000258216	0.0045182	RING/FYVE/PHD zinc finger superfamily protein	>XP_001692473 predicted protein [Chlamydomonas reinhardtii].
Cre10.g458850.t1.2	15.521	29.4557	1.58625	-18.5694	-4.21486	0.000260271	0.00454909
Cre10.g442700.t1.2	195.636	308.602	82.6691	-3.73299	-1.90033	0.000264885	0.00460917	P-loop containing nucleoside triphosphate hydrolases superfamily protein	>XP_001690516 hypothetical protein CHLREDRAFT_24073 [Chlamydomonas reinhardtii].
Cre01.g022850.t1.2	10.3305	17.2453	3.41572	-5.04879	-2.33594	0.000266679	0.00463524
Cre01.g008800.t1.3	22.9028	36.5371	9.26857	-3.94204	-1.97894	0.000268618	0.00466378
Cre17.g720350.t1.1	113.264	168.497	58.0316	-2.90354	-1.53781	0.000271816	0.00470683	homologue of bacterial MinE 1	>XP_001697195 chloroplast division site-determinant MinE [Chlamydomonas reinhardtii].
Cre06.g271700.t1.3	27.8103	42.4906	13.13	-3.23613	-1.69427	0.000275575	0.00475773	Peptidase M20/M25/M40 family protein	>XP_001696484 hypothetical protein CHLREDRAFT_142102 [Chlamydomonas reinhardtii].
Cre12.g534450.t1.3	610.222	890.489	329.955	-2.69882	-1.43233	0.000281131	0.00483287	SMAD/FHA domain-containing protein	>XP_001692997 predicted protein [Chlamydomonas reinhardtii].
g18016.t1	7.69274	13.5956	1.78986	-7.59589	-2.92522	0.000285551	0.00490347	FAD/NAD(P)-binding oxidoreductase family protein	>XP_003530060 PREDICTED: uncharacterized protein Cbei_0202-like [Glycine max].
Cre06.g270200.t1.3	48.3426	79.5613	17.1238	-4.64625	-2.21607	0.000287916	0.00493327	Phosphoinositide-specific phospholipase C family protein	>AFI57054 PI-specific phospholipase C, partial [Chlamydomonas reinhardtii].
Cre06.g261500.t1.2	69.1816	102.583	35.7799	-2.86707	-1.51958	0.000292905	0.00500677	Thioredoxin family protein	>XP_001696318 predicted protein, partial [Chlamydomonas reinhardtii].
Cre13.g577100.t1.2	2184.6	3116.7	1252.51	-2.48837	-1.3152	0.000294549	0.00502497	acyl carrier protein 1	>XP_001693782 acyl-carrier protein [Chlamydomonas reinhardtii].
Cre13.g568450.t1.3	15.5866	25.9588	5.21435	-4.97833	-2.31566	0.000295382	0.00502823	P-loop containing nucleoside triphosphate hydrolases superfamily protein	>XP_001693708 predicted protein, partial [Chlamydomonas reinhardtii].
g11680.t1	17.0137	27.3514	6.67608	-4.09692	-2.03454	0.000321274	0.00541024	histone deacetylase 6	>XP_001699476 histone deacetylase, partial [Chlamydomonas reinhardtii].
Cre12.g550850.t1.2	11059.8	16648.2	5471.52	-3.04269	-1.60535	0.000323313	0.00543291	photosystem II subunit P-1	>XP_001694126 oxygen-evolving enhancer protein 2 of photosystem II [Chlamydomonas reinhardtii].
g5062.t1	38.8228	60.8116	16.8339	-3.61245	-1.85298	0.000328164	0.00550262		>XP_001703698 predicted protein [Chlamydomonas reinhardtii].
Cre16.g673150.t1.2	44.2279	68.0319	20.4239	-3.331	-1.73595	0.000338451	0.00565164	histone deacetylase 9	>XP_001695812 histone deacetylase, partial [Chlamydomonas reinhardtii].
g8395.t1	289.978	492.801	87.1563	-5.65421	-2.49933	0.00033847	0.00565164	carbamoyl phosphate synthetase B	>XP_002958251 hypothetical protein VOLCADRAFT_77870 [Volvox carteri f. nagariensis].
Cre06.g275300.t1.2	76.1448	112.831	39.4582	-2.85952	-1.51577	0.000342077	0.00569329		>XP_001696448 hypothetical protein CHLREDRAFT_167014 [Chlamydomonas reinhardtii].
g9826.t1	7.96129	14.5677	1.35486	-10.7522	-3.42656	0.000343576	0.00570612	ataurora3	>XP_002947093 aurora like protein kinase [Volvox carteri f. nagariensis].
g1666.t1	3.67817	7.21133	0.145002	-49.7328	-5.63612	0.000343366	0.00570612		>XP_002947356 hypothetical protein VOLCADRAFT_103449 [Volvox carteri f. nagariensis].
Cre10.g458500.t1.2	471.371	692.92	249.823	-2.77364	-1.47178	0.000347108	0.0057587	aspartate kinase 1	>XP_001698576 aspartate kinase [Chlamydomonas reinhardtii].
Cre13.g588400.t1.3	36.8469	60.4793	13.2146	-4.57671	-2.19431	0.000351819	0.00582452		>XP_001693882 predicted protein [Chlamydomonas reinhardtii].
Cre06.g308950.t1.2	80.3031	119.886	40.7204	-2.94412	-1.55783	0.000352584	0.00583102	VIRB2-interacting protein 1	>XP_002947022 hypothetical protein VOLCADRAFT_103251 [Volvox carteri f. nagariensis].
Cre08.g383250.t1.2	22.8388	37.5499	8.12782	-4.61992	-2.20787	0.000353686	0.00583694		>XP_001694220 predicted protein [Chlamydomonas reinhardtii].
g8939.t1	6.1073	10.8114	1.40324	-7.7046	-2.94572	0.000355654	0.00585708	phosphoglucosamine mutase-related	>XP_001694350 predicted protein [Chlamydomonas reinhardtii].
g2736.t1	19.1286	31.7949	6.46222	-4.92011	-2.29869	0.000356806	0.0058699	PAS domain-containing protein tyrosine kinase family protein	>XP_001700484 predicted protein [Chlamydomonas reinhardtii].
Cre06.g307500.t1.1	377.503	534.659	220.347	-2.42644	-1.27884	0.000360603	0.00591993		>XP_001691223 low-CO2 inducible protein [Chlamydomonas reinhardtii].
Cre12.g489400.t1.2	16.1407	25.6536	6.62783	-3.87058	-1.95255	0.000364337	0.00596734	phosphate transporter 2;1	>XP_001691110 sodium/phosphate symporter [Chlamydomonas reinhardtii].	inorganic phosphate transporter (PiT) family.	2.A.20.2.6
Cre16.g673700.t1.2	8.5408	14.8949	2.18673	-6.81148	-2.76797	0.000365658	0.00597788		>XP_004238421 PREDICTED: pre-rRNA-processing protein TSR1 homolog [Solanum lycopersicum].
Cre11.g477950.t1.3	41.4021	62.7087	20.0956	-3.12052	-1.64178	0.000368241	0.00601383		>XP_001697306 hypothetical protein CHLREDRAFT_176621 [Chlamydomonas reinhardtii].
Cre05.g230850.t1.3	59.4012	90.405	28.3974	-3.18356	-1.67064	0.000380165	0.00618924		>XP_002953122 hypothetical protein VOLCADRAFT_105815 [Volvox carteri f. nagariensis].
g3408.t1	72.6111	108.486	36.736	-2.95313	-1.56224	0.000391849	0.00635963	selenium-binding protein 2	>XP_001703358 selenium binding protein [Chlamydomonas reinhardtii].
Cre08.g361400.t1.2	10.1712	17.5272	2.81524	-6.22583	-2.63827	0.000393543	0.00637681	TESMIN/TSO1-like CXC 2
Cre14.g633750.t1.3	126.659	216.949	36.3693	-5.96516	-2.57656	0.000404513	0.00653137	ARM repeat superfamily protein	>XP_002952319 hypothetical protein VOLCADRAFT_105457 [Volvox carteri f. nagariensis].
Cre12.g525100.t1.2	10.1269	16.7122	3.54172	-4.71866	-2.23838	0.00041162	0.0066053	structural maintenance of chromosomes 5	>XP_001697007 structural maintenance of chromosomes protein 6B [Chlamydomonas reinhardtii].
Cre10.g452650.t1.2	105.221	154.951	55.4902	-2.79241	-1.48151	0.00041228	0.00660912	translocase inner membrane subunit 17-2	>XP_001698342 mitochondrial inner membrane translocase [Chlamydomonas reinhardtii].	mitochondrial protein translocase (MPT) family.	3.A.8.1.1
Cre13.g569350.t1.2	35.803	55.2259	16.38	-3.37154	-1.75341	0.000413518	0.00662221	NAD(P)-binding Rossmann-fold superfamily protein	>XP_002950118 hypothetical protein VOLCADRAFT_90627 [Volvox carteri f. nagariensis].
Cre09.g386750.t1.2	270.97	396.45	145.489	-2.72494	-1.44623	0.000416535	0.00664337	HEAT SHOCK PROTEIN 81.4	>XP_001695264 heat shock protein 90A [Chlamydomonas reinhardtii].
Cre14.g620350.t1.2	87.565	129.566	45.5639	-2.84361	-1.50773	0.000419357	0.00666803	GTP cyclohydrolase II	>XP_001689850 bifunctional GTP cyclohydrolase, partial [Chlamydomonas reinhardtii].
Cre02.g108150.t1.1	17.5204	28.3851	6.6556	-4.26485	-2.09249	0.000418559	0.00666803		>XP_001699728 predicted protein, partial [Chlamydomonas reinhardtii].
g6609.t1	1812.78	2574.59	1050.96	-2.44974	-1.29263	0.000425721	0.00674187	photosystem II light harvesting complex gene 2.1	>XP_001695467 chlorophyll a-b binding protein of LHCII [Chlamydomonas reinhardtii].	plant photosystem I supercomplex (PSI) family.	5.B.4.1.1
Cre16.g661450.t1.2	37.8642	58.3131	17.4154	-3.34837	-1.74346	0.000425655	0.00674187	Histone superfamily protein	>XP_001697869 histone H3 variant [Chlamydomonas reinhardtii].
Cre12.g531900.t1.2	69.2472	103.104	35.3901	-2.91337	-1.54269	0.000427249	0.00675924		>XP_001692916 flavodoxin-like protein, partial [Chlamydomonas reinhardtii].
Cre08.g372500.t1.2	10.5676	18.1941	2.94111	-6.18614	-2.62904	0.000432008	0.00682765	IKI3 family protein	>XP_002947295 hypothetical protein VOLCADRAFT_87528, partial [Volvox carteri f. nagariensis].
g16158.t1	47.8483	71.132	24.5645	-2.89573	-1.53393	0.000434583	0.00686143	Calcium-dependent lipid-binding (CaLB domain) family protein	>XP_001699201 flagellar associated protein [Chlamydomonas reinhardtii].
Cre06.g295700.t1.3	169.275	250.937	87.6125	-2.86417	-1.51812	0.000436768	0.00688899	Minichromosome maintenance (MCM2/3/5) family protein	>XP_001691326 minichromosome maintenance protein 3, partial [Chlamydomonas reinhardtii].
Cre02.g105350.t1.2	22.2217	35.028	9.41529	-3.72034	-1.89543	0.000438234	0.00690516	Protein of unknown function (DUF300)	>XP_001699979 hypothetical protein CHLREDRAFT_126669, partial [Chlamydomonas reinhardtii].
g6304.t1	39.9116	61.4409	18.3823	-3.3424	-1.74088	0.000456302	0.00714676		>XP_001692708 predicted protein [Chlamydomonas reinhardtii].
Cre12.g546050.t1.2	119.995	176.287	63.7036	-2.7673	-1.46848	0.000471529	0.00735096	1-deoxy-D-xylulose 5-phosphate reductoisomerase	>XP_002953640 hypothetical protein VOLCADRAFT_82431 [Volvox carteri f. nagariensis].
Cre14.g616200.t1.2	24.1334	37.7108	10.556	-3.57243	-1.83691	0.00049207	0.0076232	mannosyltransferase family protein	>XP_001699060 glycosyl transferase, partial [Chlamydomonas reinhardtii].
Cre06.g303650.t1.3	41.7274	62.2372	21.2176	-2.93328	-1.55251	0.000494002	0.00763803	eukaryotic translation initiation factor SUI1 family protein	>XP_001691254 hypothetical protein CHLREDRAFT_115084 [Chlamydomonas reinhardtii].
g9095.t1	6.65598	12.1797	1.13224	-10.7572	-3.42723	0.000497127	0.00767877		>XP_001695278 predicted protein, partial [Chlamydomonas reinhardtii].
g14064.t1	10.0323	19.3294	0.735246	-26.2897	-4.71643	0.000501285	0.00772777		>XP_001693737 predicted protein, partial [Chlamydomonas reinhardtii].
g9845.t1	498.433	714.753	282.112	-2.53358	-1.34118	0.00050644	0.00776145
Cre02.g101700.t1.1	65.762	98.4848	33.0392	-2.98085	-1.57572	0.000506296	0.00776145		>XP_001699803 hypothetical protein CHLREDRAFT_182218 [Chlamydomonas reinhardtii].
Cre12.g517800.t1.2	87.0472	141.081	33.0139	-4.27337	-2.09537	0.000505743	0.00776145	RING/FYVE/PHD zinc finger superfamily protein	>XP_001697079 hypothetical protein CHLREDRAFT_205576 [Chlamydomonas reinhardtii].
Cre12.g512500.t1.3	4.83687	8.96773	0.706002	-12.7021	-3.667	0.000512789	0.00783577	zinc knuckle (CCHC-type) family protein	>XP_001690884 predicted protein, partial [Chlamydomonas reinhardtii].
Cre16.g676600.t1.3	73.5033	106.699	40.3072	-2.64715	-1.40444	0.00051442	0.00784754		>XP_001695951 hypothetical protein CHLREDRAFT_191557 [Chlamydomonas reinhardtii].
Cre01.g045950.t1.1	36.5144	56.9875	16.0413	-3.55255	-1.82886	0.00051456	0.00784754		>XP_001689729 predicted protein [Chlamydomonas reinhardtii].
Cre09.g391650.t1.2	96.2279	140.588	51.8678	-2.71051	-1.43856	0.000521691	0.00794857		>XP_001694454 hybrid-cluster protein [Chlamydomonas reinhardtii].
g12404.t1	21.8855	34.7837	8.98734	-3.87031	-1.95245	0.000524062	0.00797693	THO2	>XP_002947171 hypothetical protein VOLCADRAFT_103265 [Volvox carteri f. nagariensis].
Cre01.g032700.t1.2	61.5587	91.1931	31.9244	-2.85653	-1.51427	0.000548142	0.00829515		>XP_001689605 glucokinase [Chlamydomonas reinhardtii].
g18111.t1	27.6422	44.0912	11.1932	-3.93911	-1.97787	0.000547708	0.00829515
Cre01.g034050.t1.2	55.4836	81.7682	29.199	-2.80038	-1.48562	0.000551841	0.00833503	Pyridoxal phosphate (PLP)-dependent transferases superfamily protein	>XP_001690081 predicted protein [Chlamydomonas reinhardtii].
Cre04.g228950.t1.2	93.3162	137.066	49.5668	-2.76527	-1.46742	0.000560843	0.0084547		>XP_001692242 hypothetical protein CHLREDRAFT_189491 [Chlamydomonas reinhardtii].
Cre13.g573100.t1.3	12.0163	20.1715	3.86096	-5.22448	-2.38529	0.000567263	0.00853508	CBS domain-containing protein with a domain of unknown function (DUF21)	>XP_002951848 hypothetical protein VOLCADRAFT_121027 [Volvox carteri f. nagariensis].	HlyC/CorC (HCC) family.	9.A.40.3.1
Cre09.g394550.t1.2	351.554	507.661	195.447	-2.59743	-1.37708	0.000569756	0.00855616	Phosphoribosyltransferase family protein	>XP_001694483 ribose-phosphate pyrophosphokinase [Chlamydomonas reinhardtii].
Cre11.g478700.t1.2	120.763	177.155	64.3708	-2.75211	-1.46054	0.000576033	0.00863384	FK506- and rapamycin-binding protein 15 kD-2	>XP_001697373 peptidyl-prolyl cis-trans isomerase, FKBP-type [Chlamydomonas reinhardtii].
Cre01.g008150.t1.3	8.46501	14.4723	2.45773	-5.88848	-2.5579	0.000576581	0.00863384	Protein phosphatase 2C family protein
g13546.t1	10.1746	17.1663	3.18286	-5.39334	-2.43118	0.000578483	0.00865406	chromatin assembly factor-1 (FASCIATA1) (FAS1)
Cre05.g246200.t1.3	12.3925	20.7806	4.0045	-5.18932	-2.37554	0.000580224	0.00865532	phototropin 2
g11256.t1	226.936	334.038	119.834	-2.7875	-1.47897	0.000590149	0.00879502		>XP_001698393 hypothetical protein CHLREDRAFT_187730 [Chlamydomonas reinhardtii].
Cre12.g535019.t1.2	9.216	16.2745	2.15749	-7.54327	-2.91519	0.000597605	0.00887341
Cre06.g252700.t1.2	43.7279	65.056	22.3997	-2.90433	-1.5382	0.000602616	0.00893833	hydroxyproline-rich glycoprotein family protein	>XP_001696401 splicing factor 3a, subunit 2 [Chlamydomonas reinhardtii].
Cre07.g335300.t1.2	107.851	160.815	54.8872	-2.92992	-1.55086	0.000604819	0.00896253	fatty acid biosynthesis 1	>XP_001700152 3-ketoacyl-ACP-synthase [Chlamydomonas reinhardtii].
g7248.t1	23.5888	40.0371	7.14045	-5.60708	-2.48725	0.000606066	0.00896506	serine carboxypeptidase-like 20	>XP_002954275 hypothetical protein VOLCADRAFT_118648 [Volvox carteri f. nagariensis].
Cre07.g352550.t1.2	8.96474	15.1625	2.76699	-5.47978	-2.45412	0.000641758	0.0094474	Rhodanese/Cell cycle control phosphatase superfamily protein
Cre07.g334100.t1.2	31.018	46.195	15.841	-2.91617	-1.54408	0.000653509	0.00958794	sec7 domain-containing protein	>XP_001700166 EMB30/GNOM-like protein [Chlamydomonas reinhardtii].
Cre02.g097250.t1.2	50.0034	74.9462	25.0605	-2.99061	-1.58044	0.00066434	0.00973413	ARM repeat superfamily protein	>EFN54933 hypothetical protein CHLNCDRAFT_134668 [Chlorella variabilis].
Cre12.g488050.t1.2	20.5978	32.6137	8.58183	-3.80032	-1.92612	0.000670639	0.00979896	cell wall invertase 4	>XP_001690911 glycoside-hydrolase-like protein [Chlamydomonas reinhardtii].
Cre14.g620150.t1.1	44.7213	66.617	22.8257	-2.91851	-1.54523	0.000681724	0.00995165	Peptidase family M48 family protein	>XP_001689847 predicted protein, partial [Chlamydomonas reinhardtii].
g14702.t1	47.2719	71.1689	23.375	-3.04466	-1.60628	0.000689843	0.0100365
Cre06.g260650.t1.3	14.3087	26.3046	2.31273	-11.3739	-3.50765	0.000690099	0.0100365	Protein of unknown function (DUF288)	>XP_001696327 predicted protein [Chlamydomonas reinhardtii].
Cre15.g639600.t1.3	50.3382	80.8719	19.8045	-4.08351	-2.02981	0.000740786	0.0106356
Cre05.g236039.t1.2	107.066	159.693	54.44	-2.93337	-1.55256	0.000743249	0.0106514		>XP_001697807 hypothetical protein CHLREDRAFT_184989 [Chlamydomonas reinhardtii].
Cre17.g726500.t1.2	27.0865	40.9762	13.1968	-3.10501	-1.6346	0.000745216	0.0106601	origin recognition complex subunit 4	>XP_001697162 origin recognition complex subunit 4, partial [Chlamydomonas reinhardtii].
g17841.t1	7.75694	13.2114	2.30249	-5.73787	-2.52052	0.000749446	0.0107109	Leucine-rich receptor-like protein kinase family protein	>XP_001699581 hypothetical protein CHLREDRAFT_193881 [Chlamydomonas reinhardtii].
Cre09.g400050.t1.3	147.644	209.027	86.261	-2.42319	-1.27691	0.000755649	0.0107701		>XP_002955206 hypothetical protein VOLCADRAFT_96140 [Volvox carteri f. nagariensis].
g1849.t1	52.3854	76.0712	28.6996	-2.6506	-1.40632	0.000767963	0.0109158		>XP_001702156 hypothetical protein CHLREDRAFT_185865 [Chlamydomonas reinhardtii].
Cre17.g735650.t1.3	24.2647	38.5357	9.9937	-3.856	-1.9471	0.000769277	0.0109224		>XP_001699570 predicted protein, partial [Chlamydomonas reinhardtii].
g18121.t1	29.1081	44.5138	13.7024	-3.24862	-1.69983	0.000779029	0.0110331	P-loop containing nucleoside triphosphate hydrolases superfamily protein	>XP_001703646 predicted protein [Chlamydomonas reinhardtii].
Cre10.g439450.t1.1	18.1139	33.0934	3.13449	-10.5578	-3.40024	0.000781737	0.0110614		>XP_001690551 hypothetical protein CHLREDRAFT_188400 [Chlamydomonas reinhardtii].
Cre13.g606800.t1.2	13.7681	21.7596	5.7767	-3.76679	-1.91333	0.000793625	0.0111993		>XP_001699147 hypothetical protein CHLREDRAFT_185300 [Chlamydomonas reinhardtii].
Cre09.g413100.t1.3	35.3909	53.4146	17.3673	-3.07559	-1.62086	0.000802246	0.0113108		>XP_001696806 hypothetical protein CHLREDRAFT_192113 [Chlamydomonas reinhardtii].
Cre08.g372750.t1.3	12.9383	20.9904	4.88621	-4.29584	-2.10294	0.000807793	0.0113788		>XP_002947157 hypothetical protein VOLCADRAFT_103388, partial [Volvox carteri f. nagariensis].
Cre13.g563800.t1.3	10.4936	17.0588	3.92835	-4.34249	-2.11852	0.000817942	0.0115011	myosin-like protein XIG	>XP_001693409 myosin heavy chain, partial [Chlamydomonas reinhardtii].
Cre12.g492950.t1.2	371.326	519.03	223.621	-2.32102	-1.21476	0.000822183	0.011525	ribonucleotide reductase 1	>XP_001700540 ribonucleoside-diphosphate reductase large subunit [Chlamydomonas reinhardtii].
Cre10.g454600.t1.1	38.1189	57.6523	18.5855	-3.102	-1.6332	0.000821556	0.011525		>XP_001698357 predicted protein [Chlamydomonas reinhardtii].
g1899.t1	30.7775	46.9755	14.5794	-3.22204	-1.68797	0.00082135	0.011525	disproportionating enzyme 2	>XP_001701179 4-alpha-glucanotransferase, partial [Chlamydomonas reinhardtii].
g9116.t1	12.9134	21.4445	4.38236	-4.89336	-2.29083	0.000831782	0.0116394		>XP_001695271 predicted protein, partial [Chlamydomonas reinhardtii].
Cre01.g054500.t1.2	463.103	646.839	279.367	-2.31537	-1.21124	0.000842032	0.0117137		>XP_001700222 NAD(P) transhydrogenase [Chlamydomonas reinhardtii].	proton-translocating transhydrogenase (PTH) family.	3.D.2.3.1
Cre02.g083950.t1.1	978.864	1389.12	568.605	-2.44304	-1.28867	0.000847306	0.0117662	Ribosomal protein PSRP-3/Ycf65	>XP_001701911 plastid-specific ribosomal protein 3 [Chlamydomonas reinhardtii].
Cre16.g651100.t1.3	10.5838	17.7137	3.45386	-5.12866	-2.35858	0.000858042	0.0118732		>XP_001698241 hypothetical protein CHLREDRAFT_151650, partial [Chlamydomonas reinhardtii].
Cre05.g248400.t1.2	35.5601	54.1019	17.0183	-3.17905	-1.66859	0.000859384	0.0118813	beta carbonic anhydrase 6	>AAC49887 beta-carbonic anhydrase [Chlamydomonas reinhardtii].
Cre02.g098850.t1.1	204.931	303.509	106.353	-2.85379	-1.51288	0.000860353	0.0118842	NADPH-dependent thioredoxin reductase A	>XP_001699827 NADPH dependent thioredoxin reductase [Chlamydomonas reinhardtii].
Cre12.g508250.t1.3	147.418	213.337	81.4992	-2.61766	-1.38828	0.000903995	0.0124282	Ubiquitin carboxyl-terminal hydrolase-related protein
g11690.t2	13.4073	22.3355	4.47911	-4.98658	-2.31805	0.000905834	0.0124282		>XP_001699481 predicted protein [Chlamydomonas reinhardtii].
g9870.t1	3489.17	5195.08	1783.25	-2.91326	-1.54263	0.000907345	0.0124347		>XP_001694803 predicted protein [Chlamydomonas reinhardtii].
g6345.t1	104.112	152.129	56.0954	-2.71196	-1.43934	0.000910282	0.0124641		>XP_001698077 hypothetical protein CHLREDRAFT_176806 [Chlamydomonas reinhardtii].
Cre17.g696300.t1.3	35.4266	51.9305	18.9227	-2.74435	-1.45647	0.000921414	0.0125836	RING/U-box superfamily protein	>XP_002949015 hypothetical protein VOLCADRAFT_120687 [Volvox carteri f. nagariensis].
Cre13.g604800.t1.2	11.1722	18.5904	3.75397	-4.95218	-2.30806	0.000921356	0.0125836		>XP_002947165 hypothetical protein VOLCADRAFT_87554 [Volvox carteri f. nagariensis].
Cre02.g103350.t1.3	4.71619	8.84214	0.590244	-14.9805	-3.90501	0.000943002	0.0128448	fatty acid amide hydrolase	>XP_002949694 hypothetical protein VOLCADRAFT_89962 [Volvox carteri f. nagariensis].
Cre12.g556250.t1.2	499.818	717.035	282.6	-2.53728	-1.34328	0.000958573	0.0130343		>XP_001694177 septin-like protein [Chlamydomonas reinhardtii].
Cre03.g159450.t1.3	6.21332	11.082	1.34462	-8.24174	-3.04295	0.000973643	0.013182		>XP_001697502 ornithine decarboxylase 1 [Chlamydomonas reinhardtii].
Cre06.g269050.t1.2	384.435	549.376	219.494	-2.50292	-1.32361	0.000978753	0.0132398	NAD(P)-binding Rossmann-fold superfamily protein	>XP_002945953 hypothetical protein VOLCADRAFT_78986 [Volvox carteri f. nagariensis].	chloroplast envelope protein translocase (CEPT or tic-Toc) family.	3.A.9.1.1
g96.t1	33.2443	53.2913	13.1973	-4.03804	-2.01366	0.000980487	0.0132518
g1543.t2	20.0861	31.5626	8.6096	-3.66597	-1.8742	0.000999645	0.0134412	rhamnose biosynthesis 1	>XP_001701714 NAD-dependent epimerase/dehydratase [Chlamydomonas reinhardtii].
Cre07.g330750.t1.3	605.34	875.793	334.888	-2.61518	-1.38691	0.00100303	0.0134751
g9643.t1	5.2506	9.69858	0.802628	-12.0835	-3.59497	0.00103009	0.0137678		>XP_001696756 O-methyltransferase [Chlamydomonas reinhardtii].
Cre02.g086550.t1.3	8.28285	14.3204	2.24535	-6.3778	-2.67306	0.00105638	0.0140833	Radical SAM superfamily protein	>XP_001701740 predicted Fe-S-cluster redox enzyme [Chlamydomonas reinhardtii].
Cre16.g661750.t1.2	9.66204	18.9565	0.367623	-51.5649	-5.68832	0.00108034	0.0143783		>XP_001697872 hypothetical protein CHLREDRAFT_120683, partial [Chlamydomonas reinhardtii].
Cre13.g581850.t1.2	16.7827	26.8994	6.66597	-4.03533	-2.01269	0.00108561	0.0144362	Protein kinase superfamily protein	>XP_001693817 ser/thr kinase, ABC1 family [Chlamydomonas reinhardtii].
Cre01.g050100.t1.2	558.796	797.641	319.951	-2.49301	-1.31789	0.00108657	0.0144366	Pyridoxal-dependent decarboxylase family protein	>XP_001690241 diaminopimelate decarboxylase [Chlamydomonas reinhardtii].
Cre11.g467600.t1.3	3.64809	6.75419	0.541994	-12.4617	-3.63943	0.00109101	0.0144833		>XP_001699532 predicted protein [Chlamydomonas reinhardtii].
Cre13.g581700.t1.3	21.7549	35.7497	7.76007	-4.60689	-2.20379	0.00110495	0.0146189		>XP_001693578 predicted protein [Chlamydomonas reinhardtii].
Cre12.g531400.t1.3	17.5754	28.4002	6.75063	-4.20704	-2.07281	0.00111186	0.0146979
Cre14.g632100.t1.3	10.3351	17.1197	3.55049	-4.82179	-2.26957	0.00111914	0.0147693		>XP_001692761 predicted protein [Chlamydomonas reinhardtii].
Cre16.g687900.t1.2	8420.16	11779.8	5060.57	-2.32775	-1.21894	0.00112148	0.0147753	photosystem I light harvesting complex gene 5	>AAO16495 light-harvesting complex I protein [Chlamydomonas reinhardtii].	plant photosystem I supercomplex (PSI) family.	5.B.4.1.1
Cre10.g439800.t1.2	6.68227	11.7489	1.61562	-7.27209	-2.86237	0.00112906	0.0148377		>XP_001690545 hypothetical protein CHLREDRAFT_169324, partial [Chlamydomonas reinhardtii].
Cre08.g371650.t1.2	43.8245	61.9959	25.653	-2.41671	-1.27305	0.00114931	0.0150534	Bacterial sec-independent translocation protein mttA/Hcf106	>XP_001701324 TatB-like sec-independent protein translocon subunit [Chlamydomonas reinhardtii].	twin arginine targeting (Tat) family.	2.A.64.2.1
Cre16.g659900.t1.3	80.4853	118.02	42.9505	-2.74782	-1.45829	0.00116286	0.0151802
Cre13.g592450.t1.2	181.351	260.07	102.633	-2.53399	-1.34141	0.00116587	0.0151941	Coatomer epsilon subunit	>XP_001693085 epsilon-cop [Chlamydomonas reinhardtii].
Cre12.g555550.t1.2	40.7737	61.3943	20.153	-3.04641	-1.60711	0.00116583	0.0151941	villin 3	>XP_002958779 actin-binding protein gelsolin [Volvox carteri f. nagariensis].
g5420.t1	27.3819	40.6966	14.0673	-2.89299	-1.53256	0.00117796	0.0153262	MUTS homolog 6	>XP_002953223 hypothetical protein VOLCADRAFT_105835 [Volvox carteri f. nagariensis].
Cre07.g348450.t1.3	158.764	219.381	98.1459	-2.23526	-1.16044	0.00118611	0.0154194	calcium-dependent protein kinase 24	>XP_001692574 predicted protein, partial [Chlamydomonas reinhardtii].
g12633.t1	13.524	22.4723	4.57573	-4.91119	-2.29607	0.00119244	0.015476	NAD(P)-binding Rossmann-fold superfamily protein	>XP_001702361 heme peroxidase-related protein [Chlamydomonas reinhardtii].
Cre14.g610150.t1.2	27.5802	48.1942	6.96621	-6.91829	-2.79041	0.00119599	0.0155093		>XP_001701355 hypothetical protein CHLREDRAFT_179428 [Chlamydomonas reinhardtii].
Cre03.g165471.t1.2	43.622	63.7817	23.4622	-2.71848	-1.4428	0.00120295	0.0155867
Cre10.g455850.t1.2	67.1423	95.4142	38.8705	-2.45467	-1.29553	0.00121068	0.015648	Minichromosome maintenance (MCM2/3/5) family protein	>XP_001698548 minichromosome maintenance protein 7, partial [Chlamydomonas reinhardtii].
g4471.t1	38.4344	66.8252	10.0435	-6.65355	-2.73412	0.00120976	0.015648		>XP_001699463 hypothetical protein CHLREDRAFT_193604 [Chlamydomonas reinhardtii].
Cre12.g510500.t1.3	20.7361	31.7408	9.73135	-3.26171	-1.70563	0.00123622	0.0159007		>XP_001690870 predicted protein [Chlamydomonas reinhardtii].
Cre17.g696550.t1.2	18.0343	27.7182	8.35044	-3.31937	-1.73091	0.00123756	0.0159007		>XP_001691652 predicted protein [Chlamydomonas reinhardtii].
Cre02.g119450.t1.2	104.755	158.605	50.906	-3.11564	-1.63953	0.00125226	0.0160531	O-fucosyltransferase family protein	>XP_001702413 predicted protein [Chlamydomonas reinhardtii].
Cre17.g702750.t1.2	15.9248	24.8347	7.01483	-3.54032	-1.82388	0.00126015	0.016141	NAD(P)-binding Rossmann-fold superfamily protein	>XP_001691588 predicted protein, partial [Chlamydomonas reinhardtii].
Cre09.g393450.t1.3	53.5647	80.0019	27.1276	-2.94909	-1.56027	0.00129053	0.0164629		>XP_001694471 flagellar associated protein [Chlamydomonas reinhardtii].
Cre06.g250450.t1.2	132.091	183.235	80.9461	-2.26367	-1.17866	0.00129291	0.01647	Sodium Bile acid symporter family	>XP_002954513 hypothetical protein VOLCADRAFT_82799 [Volvox carteri f. nagariensis].	unknown BART superfamily-1 (UBS1) family.	2.A.93.1.6
g2833.t1	69.6607	103.913	35.4088	-2.93465	-1.55319	0.0012991	0.0165185	UB-like protease 1A	>XP_001702235 hypothetical protein CHLREDRAFT_179935, partial [Chlamydomonas reinhardtii].
Cre17.g740050.t1.3	7.45818	13.3301	1.58625	-8.40354	-3.071	0.00132332	0.016745		>XP_001701082 hypothetical protein CHLREDRAFT_153318, partial [Chlamydomonas reinhardtii].
Cre11.g467500.t1.2	13.9137	21.5964	6.23109	-3.46591	-1.79323	0.00132731	0.0167819	Protein of unknown function (DUF810)
Cre10.g430500.t1.2	186.349	292.31	80.3883	-3.63622	-1.86244	0.00134342	0.0169282	Octicosapeptide/Phox/Bem1p (PB1) domain-containing protein / tetratricopeptide repeat (TPR)-containing protein	>XP_001702511 predicted protein [Chlamydomonas reinhardtii].
Cre03.g202150.t1.3	9.14984	15.4362	2.86349	-5.39069	-2.43047	0.00134357	0.0169282	chromomethylase 2
Cre16.g674950.t1.2	18.3035	27.8408	8.76631	-3.17588	-1.66716	0.00135003	0.0169734	FAD/NAD(P)-binding oxidoreductase family protein	>XP_001695939 hypothetical protein CHLREDRAFT_130438 [Chlamydomonas reinhardtii].
g15316.t1	87.1199	124.756	49.4835	-2.52117	-1.33409	0.00135379	0.0170014
Cre09.g389550.t1.3	12.1805	19.9009	4.4601	-4.46198	-2.15768	0.00136039	0.0170625	Chaperone DnaJ-domain superfamily protein	>XP_001694554 DnaJ-like protein [Chlamydomonas reinhardtii].
Cre12.g510000.t1.2	37.7217	55.2996	20.1439	-2.74523	-1.45693	0.00139316	0.0174178	Protein of unknown function (DUF760)	>XP_001691046 predicted protein [Chlamydomonas reinhardtii].
Cre07.g352400.t1.2	23.2112	35.7213	10.7012	-3.33807	-1.73902	0.00140213	0.0175021	DNAse I-like superfamily protein	>XP_001692497 inositol polyphosphate phosphatase-like protein [Chlamydomonas reinhardtii].
g8888.t1	19.4517	30.767	8.13646	-3.78138	-1.91891	0.00141903	0.0176708	ARM repeat superfamily protein	>XP_002952934 hypothetical protein VOLCADRAFT_105749 [Volvox carteri f. nagariensis].
Cre03.g203700.t1.3	84.9496	125.219	44.6797	-2.8026	-1.48677	0.00142715	0.0177296		>XP_002950295 hypothetical protein VOLCADRAFT_90779 [Volvox carteri f. nagariensis].
Cre04.g214350.t1.3	12.275	20.3317	4.21835	-4.81982	-2.26898	0.00142944	0.0177415	DNA-directed DNA polymerases	>XP_002957568 hypothetical protein VOLCADRAFT_107737 [Volvox carteri f. nagariensis].
Cre02.g099350.t1.3	205.016	350.576	59.4559	-5.89641	-2.55984	0.00146246	0.0181109
Cre13.g589050.t1.2	22.0759	34.2739	9.87782	-3.46978	-1.79485	0.00149646	0.0184591		>XP_001693893 predicted protein [Chlamydomonas reinhardtii].
Cre16.g652300.t1.3	4.69326	9.38651	0	0	#NAME?	0.00150367	0.0185189		>XP_001698226 transmembrane protein of CMA family [Chlamydomonas reinhardtii].
Cre16.g688700.t1.2	27.3042	43.2409	11.3676	-3.80388	-1.92747	0.00150319	0.0185189	alpha/beta-Hydrolases superfamily protein	>XP_002952016 hypothetical protein VOLCADRAFT_92631 [Volvox carteri f. nagariensis].
Cre07.g347400.t1.2	25.472	42.2274	8.71659	-4.84448	-2.27634	0.00151651	0.0186223	D111/G-patch domain-containing protein	>XP_001692447 predicted protein [Chlamydomonas reinhardtii].
Cre03.g178600.t1.1	113.515	170.251	56.7789	-2.99849	-1.58424	0.0015264	0.0187253	DNA topoisomerase 1 beta	>XP_001703256 DNA topoisomerase I, partial [Chlamydomonas reinhardtii].
Cre04.g220850.t1.2	20.5874	33.0588	8.11598	-4.0733	-2.0262	0.00153678	0.0188232	ABC-2 type transporter family protein	>XP_001692171 hypothetical protein CHLREDRAFT_189401 [Chlamydomonas reinhardtii].	ATP-binding cassette (ABC) superfamily.	3.A.1.204.3
Cre11.g477000.t1.2	25.5931	40.0604	11.1258	-3.60067	-1.84827	0.00154527	0.0188976	sucrose nonfermenting 1(SNF1)-related protein kinase 2.3	>XP_001697296 ser/thr protein kinase, partial [Chlamydomonas reinhardtii].
Cre16.g691450.t1.2	76.7823	109.07	44.4947	-2.4513	-1.29355	0.00154889	0.0188991		>XP_001699292 hypothetical protein CHLREDRAFT_152481 [Chlamydomonas reinhardtii].
Cre06.g272100.t1.3	13.1913	21.3219	5.06071	-4.21323	-2.07493	0.00155542	0.0189625	initiator tRNA phosphoribosyl transferase family protein	>XP_001696209 hypothetical protein CHLREDRAFT_97982, partial [Chlamydomonas reinhardtii].
Cre02.g080650.t1.2	186.023	255.724	116.323	-2.19839	-1.13645	0.00156105	0.0190164	Chaperone protein htpG family protein	>XP_001701885 heat shock protein 90B, partial [Chlamydomonas reinhardtii].
g2920.t1	141.175	198.134	84.2165	-2.35267	-1.2343	0.0015659	0.0190608	Galactose oxidase/kelch repeat superfamily protein	>XP_001695733 flagellar outer dynein arm heavy chain alpha [Chlamydomonas reinhardtii].
Cre16.g652250.t1.2	7.92368	13.0512	2.79611	-4.66765	-2.2227	0.00157355	0.0191241		>XP_001698225 flagellar associated protein [Chlamydomonas reinhardtii].
Cre03.g161400.t1.2	187.582	269.773	105.392	-2.55972	-1.35598	0.00157915	0.0191773	tryptophan synthase beta-subunit 2	>XP_001703397 tryptophan synthase beta subunit [Chlamydomonas reinhardtii].
Cre17.g730000.t1.2	14.9653	24.0189	5.91159	-4.06303	-2.02255	0.00161062	0.0194863		>XP_001701550 predicted protein, partial [Chlamydomonas reinhardtii].
g7537.t1	89.3935	130.853	47.9337	-2.72988	-1.44884	0.00161228	0.019489	adenylate kinase 1	>XP_001702869 adenylate kinase 1 [Chlamydomonas reinhardtii].
Cre13.g605900.t1.3	56.7824	97.932	15.6327	-6.26456	-2.64721	0.00162031	0.019556
g2974.t1	43.6865	64.7825	22.5905	-2.86769	-1.51989	0.00162161	0.0195566	oxidoreductases, acting on the aldehyde or oxo group of donors, NAD or NADP as acceptor;copper ion binding	>XP_001695710 N-acetyl-gamma-glutamyl-phosphate reductase [Chlamydomonas reinhardtii].
Cre16.g679950.t1.2	65.9849	96.8419	35.1278	-2.75684	-1.46302	0.00163738	0.0197317	ATPase family associated with various cellular activities (AAA)	>XP_001695879 DNA replication factor C complex subunit 3 [Chlamydomonas reinhardtii].
Cre14.g620300.t1.2	147.687	213.633	81.7421	-2.6135	-1.38598	0.00164389	0.0197494	anthranilate synthase beta subunit 1	>XP_001689849 anthranilate synthase beta subunit [Chlamydomonas reinhardtii].
Cre10.g428966.t1.2	9.22242	16.0647	2.38011	-6.74958	-2.7548	0.00164297	0.0197494		>XP_001702529 predicted protein, partial [Chlamydomonas reinhardtii].
Cre12.g550700.t1.2	19.2511	29.3784	9.12369	-3.22001	-1.68707	0.00164566	0.0197555	Formyl transferase	>XP_001694003 predicted protein, partial [Chlamydomonas reinhardtii].
Cre14.g617650.t1.3	4.88825	9.08951	0.686996	-13.2308	-3.72583	0.00165714	0.019878		>XP_002950511 3'5'-cyclic nucleotide phosphodiesterase [Volvox carteri f. nagariensis].
Cre13.g589600.t1.2	34.4778	52.4499	16.5058	-3.17767	-1.66797	0.00168015	0.0201233		>XP_002949834 hypothetical protein VOLCADRAFT_90260 [Volvox carteri f. nagariensis].
Cre09.g410700.t1.2	321.055	436.659	205.451	-2.12537	-1.08772	0.00168331	0.0201304	lactate/malate dehydrogenase family protein	>XP_001696786 NADP-Malate dehydrogenase [Chlamydomonas reinhardtii].
g11043.t1	10.7764	18.1181	3.43473	-5.27499	-2.39917	0.00168511	0.0201365
Cre01.g037850.t1.1	353.788	478.511	229.065	-2.08897	-1.06279	0.00169237	0.0201925	Single hybrid motif superfamily protein	>XP_001690119 acetyl-coa biotin carboxyl carrier [Chlamydomonas reinhardtii].
Cre16.g672200.t1.3	32.8356	48.9649	16.7062	-2.93094	-1.55137	0.00169203	0.0201925		>XP_001695911 hypothetical protein CHLREDRAFT_149105 [Chlamydomonas reinhardtii].
Cre01.g042850.t1.2	25.7409	42.1926	9.28917	-4.54213	-2.18337	0.00170731	0.0202936	membrane-associated progesterone binding protein 3	>EIE25758 hypothetical protein COCSUDRAFT_46368 [Coccomyxa subellipsoidea C-169].
Cre12.g487700.t1.2	6.22054	10.6512	1.78986	-5.95085	-2.5731	0.00171129	0.0203101		>XP_001690908 predicted protein [Chlamydomonas reinhardtii].
g4495.t1	37.3768	54.7839	19.9697	-2.74334	-1.45593	0.00171297	0.0203146	defective in exine formation protein (DEX1)	>XP_002951111 hypothetical protein VOLCADRAFT_117761 [Volvox carteri f. nagariensis].
Cre06.g298850.t1.2	82.5722	114.835	50.3098	-2.28255	-1.19065	0.00175259	0.0207218		>XP_001691449 predicted protein [Chlamydomonas reinhardtii].
Cre03.g190200.t1.2	58.576	87.5997	29.5524	-2.96422	-1.56765	0.00175144	0.0207218		>XP_001691872 predicted protein [Chlamydomonas reinhardtii].
Cre09.g389050.t1.3	6.44613	11.1316	1.76062	-6.32257	-2.66051	0.00175538	0.0207392
Cre03.g206600.t1.2	688.75	1021.73	355.771	-2.87187	-1.52199	0.00175672	0.0207393	dehydratase family	>XP_001693179 acetohydroxyacid dehydratase [Chlamydomonas reinhardtii].
g1665.t1	9.68918	15.4016	3.97672	-3.87295	-1.95343	0.00181421	0.0212739	ankyrin repeat family protein / regulator of chromosome condensation (RCC1) family protein	>XP_002946396 hypothetical protein VOLCADRAFT_102981 [Volvox carteri f. nagariensis].
Cre12.g560950.t1.2	5476.66	7395.4	3557.91	-2.07858	-1.0556	0.00182633	0.0214	photosystem I subunit G	>PSAG_CHLRE RecName: Full=Photosystem I reaction center subunit V, chloroplastic; AltName: Full=Light-harvesting complex I 10 kDa protein; AltName: Full=P35 protein; AltName: Full=PSI-G; Flags: Precursor.
Cre05.g246900.t1.2	89.3069	122.745	55.8693	-2.19699	-1.13553	0.00183322	0.0214488		>XP_001700760 blue copper protein [Chlamydomonas reinhardtii].
g6342.t1	6.52392	10.861	2.18686	-4.96648	-2.31222	0.0018346	0.0214488	carotenoid cleavage dioxygenase 7	>XP_001697996 hypothetical protein CHLREDRAFT_176809 [Chlamydomonas reinhardtii].
Cre09.g389450.t1.2	40.1609	61.1958	19.1259	-3.19963	-1.6779	0.00184198	0.021503	U-box domain-containing protein kinase family protein
Cre16.g683400.t1.2	69.4042	100.165	38.6432	-2.59205	-1.37409	0.00184349	0.0215047	Sec14p-like phosphatidylinositol transfer family protein	>XP_001691915 hypothetical protein CHLREDRAFT_183333 [Chlamydomonas reinhardtii].
Cre06.g296550.t1.2	10.0709	16.0685	4.07335	-3.9448	-1.97995	0.00185602	0.0216347	flavin-dependent monooxygenase 1	>XP_001691466 flavin-containing monooxygenase, partial [Chlamydomonas reinhardtii].
Cre03.g184500.t1.2	161.98	233.734	90.2255	-2.59056	-1.37326	0.00186506	0.0216945	Chaperone DnaJ-domain superfamily protein	>XP_001691986 predicted protein [Chlamydomonas reinhardtii].
Cre13.g571050.t1.3	42.4865	64.5304	20.4426	-3.15666	-1.6584	0.00192956	0.0223472	HMG (high mobility group) box protein with ARID/BRIGHT DNA-binding domain
g5044.t1	29.0721	46.0221	12.1221	-3.79655	-1.92469	0.00193285	0.0223619		>XP_002951964 hypothetical protein VOLCADRAFT_92489 [Volvox carteri f. nagariensis].
Cre01.g015250.t1.1	53.4882	77.4862	29.4903	-2.62751	-1.3937	0.00193838	0.0223721	DNA binding;nucleotide binding;nucleic acid binding;DNA-directed DNA polymerases;DNA-directed DNA polymerases	>XP_001689909 DNA polymerase delta subunit one [Chlamydomonas reinhardtii].
Cre12.g537100.t1.2	50.6465	71.4523	29.8408	-2.39445	-1.2597	0.00194538	0.0224097	valyl-tRNA synthetase / valine--tRNA ligase (VALRS)	>XP_002950762 hypothetical protein VOLCADRAFT_60821, partial [Volvox carteri f. nagariensis].
Cre16.g653700.t1.3	117.222	187.192	47.253	-3.96148	-1.98604	0.00195023	0.0224491	OSBP(oxysterol binding protein)-related protein 1A	>XP_001698140 hypothetical protein CHLREDRAFT_131777 [Chlamydomonas reinhardtii].
Cre01.g036100.t1.3	25.5685	38.8115	12.3256	-3.14886	-1.65483	0.001955	0.0224876	Transducin/WD40 repeat-like superfamily protein	>XP_001689638 predicted protein [Chlamydomonas reinhardtii].
Cre05.g242350.t1.2	20.2654	30.2175	10.3132	-2.92998	-1.55089	0.00197648	0.0226681	ER-type Ca2+-ATPase 2	>XP_001700727 calcium-transporting ATPase, endoplasmic reticulum-type [Chlamydomonas reinhardtii].	P-type ATPase (P-ATPase) superfamily.	3.A.3.2.13
Cre06.g311700.t1.2	90.518	132.565	48.4715	-2.7349	-1.45149	0.00203056	0.0231697		>XP_001691184 hypothetical protein CHLREDRAFT_162029 [Chlamydomonas reinhardtii].
Cre05.g240650.t1.2	4.29986	7.76772	0.831997	-9.33623	-3.22284	0.00202976	0.0231697	DNAJ heat shock N-terminal domain-containing protein	>XP_002953113 molecular chaperone [Volvox carteri f. nagariensis].
Cre10.g436600.t1.2	4.6085	8.385	0.831997	-10.0782	-3.33316	0.00202973	0.0231697	Minichromosome maintenance (MCM2/3/5) family protein	>XP_001690400 hypothetical protein CHLREDRAFT_49443, partial [Chlamydomonas reinhardtii].
Cre08.g371400.t1.3	68.5054	105.325	31.6862	-3.32399	-1.73292	0.00204989	0.0233562	RING/U-box superfamily protein	>XP_001701321 hypothetical protein CHLREDRAFT_107663, partial [Chlamydomonas reinhardtii].
Cre16.g666301.t1.2	4863.02	6492.64	3233.4	-2.00799	-1.00575	0.00207178	0.0235227	Ribosomal protein S30 family protein	>XP_001701464 ribosomal protein S30, component of cytosolic 80S ribosome and 40S small subunit [Chlamydomonas reinhardtii].
Cre17.g713000.t1.2	11.2554	17.9731	4.53772	-3.96081	-1.9858	0.00208494	0.0236012		>XP_002948935 hypothetical protein VOLCADRAFT_89304 [Volvox carteri f. nagariensis].
Cre17.g697300.t1.3	14.0427	23.1129	4.9726	-4.64805	-2.21662	0.00208776	0.0236161	Cysteine proteinases superfamily protein	>XP_001691640 predicted protein [Chlamydomonas reinhardtii].
Cre13.g589400.t1.3	69.7824	99.3509	40.2139	-2.47056	-1.30484	0.00208994	0.0236237	CAP (Cysteine-rich secretory proteins, Antigen 5, and Pathogenesis-related 1 protein) superfamily protein	>XP_001693896 predicted extracellular protein, partial [Chlamydomonas reinhardtii].
Cre08.g377600.t1.3	69.4638	101.204	37.7234	-2.6828	-1.42374	0.00210095	0.023731	DNA-directed RNA polymerase II protein	>XP_002953012 hypothetical protein VOLCADRAFT_105732 [Volvox carteri f. nagariensis].
g11229.t1	180.387	299.35	61.423	-4.87358	-2.28498	0.00211459	0.0238508	sulfate transporter 4;2	>XP_001697222 sulfate transporter [Chlamydomonas reinhardtii].	sulfate permease (SulP) family.	2.A.53.1.8
Cre13.g578650.t1.1	65.1346	91.708	38.5611	-2.37825	-1.2499	0.00214746	0.0242041	high chlorophyll fluorescence phenotype 173	>XP_001693554 predicted protein [Chlamydomonas reinhardtii].
Cre02.g096400.t1.2	5.8037	10.3888	1.21863	-8.52499	-3.0917	0.00215596	0.024265	Protein of unknown function (DUF185)	>XP_001700056 hypothetical protein CHLREDRAFT_141994, partial [Chlamydomonas reinhardtii].
Cre10.g424850.t1.2	29.0894	43.4627	14.716	-2.95342	-1.56239	0.00216473	0.0243462	pre-mRNA processing ribonucleoprotein binding region-containing protein	>XP_001702570 pre-mRNA-splicing factor [Chlamydomonas reinhardtii].
Cre07.g346150.t1.3	10.3824	17.6114	3.15349	-5.58472	-2.48148	0.00218766	0.0245161		>XP_002950362 hypothetical protein VOLCADRAFT_90670, partial [Volvox carteri f. nagariensis].
Cre06.g281700.t1.3	13.1147	20.5302	5.6992	-3.60229	-1.84891	0.00220592	0.0246855		>XP_001695446 predicted protein [Chlamydomonas reinhardtii].
Cre07.g321300.t1.2	75.5844	107.205	43.9636	-2.4385	-1.28599	0.0022197	0.024822	NAD(P)-linked oxidoreductase superfamily protein	>XP_002951309 hypothetical protein VOLCADRAFT_120959 [Volvox carteri f. nagariensis].
Cre12.g543400.t1.2	21.0556	31.3912	10.7201	-2.92827	-1.55005	0.00224619	0.0250825	GroES-like zinc-binding dehydrogenase family protein	>XP_001693934 formaldehyde dehydrogenase [Chlamydomonas reinhardtii].
Cre12.g492700.t1.2	88.8359	128.447	49.2246	-2.60941	-1.38372	0.00226126	0.0252328		>XP_001700576 fasciclin-like protein [Chlamydomonas reinhardtii].
Cre14.g627450.t1.3	12.4127	21.0625	3.76287	-5.59747	-2.48477	0.00226779	0.025252		>XP_001692697 predicted protein [Chlamydomonas reinhardtii].
Cre17.g726350.t1.3	47.4273	68.4606	26.3941	-2.59379	-1.37506	0.0022886	0.0254137	Protein of unknown function DUF92, transmembrane	>XP_001697257 hypothetical protein CHLREDRAFT_176026, partial [Chlamydomonas reinhardtii].
Cre01.g031500.t1.2	11.2746	18.8347	3.71449	-5.07059	-2.34215	0.00229162	0.0254188	Cupredoxin superfamily protein	>XP_001690061 predicted protein, partial [Chlamydomonas reinhardtii].
Cre02.g144500.t1.3	98.442	141.017	55.8667	-2.52417	-1.33581	0.00230062	0.0254905	KH domain-containing protein
Cre12.g503300.t1.2	34.5408	58.8641	10.2175	-5.76109	-2.52634	0.00231162	0.0255763	phosphoribosylaminoimidazole carboxylase, putative / AIR carboxylase, putative	>XP_001690981 phosphoribosylaminoimidazole carboxylase, eukaryotic-type [Chlamydomonas reinhardtii].
g3727.t1	48.68	70.6306	26.7294	-2.64243	-1.40187	0.00233423	0.0257569		>XP_001703251 hypothetical protein CHLREDRAFT_168878 [Chlamydomonas reinhardtii].
Cre06.g289000.t1.3	13.758	21.9047	5.61135	-3.90364	-1.96482	0.00233452	0.0257569		>XP_001695384 predicted protein [Chlamydomonas reinhardtii].
g10156.t1	240.837	331.919	149.756	-2.2164	-1.14822	0.00234506	0.0258164		>XP_001696781 hypothetical protein CHLREDRAFT_175363 [Chlamydomonas reinhardtii].
Cre01.g034950.t1.2	130.095	188.62	71.5686	-2.63552	-1.39809	0.00236671	0.0259659	general control non-repressible 4	>XP_001690091 predicted protein [Chlamydomonas reinhardtii].	ATP-binding cassette (ABC) superfamily.	3.A.1.121.4
g1851.t1	150.049	241.372	58.7269	-4.11008	-2.03917	0.00240094	0.0262862	Putative thiol-disulphide oxidoreductase DCC	>XP_001702177 hypothetical protein CHLREDRAFT_160137 [Chlamydomonas reinhardtii].
g3557.t1	258.113	363.584	152.642	-2.38194	-1.25214	0.00241227	0.0263919	Alternative oxidase family protein	>XP_001703466 plastid terminal oxidase [Chlamydomonas reinhardtii].
g8467.t1	20.2369	30.1213	10.3526	-2.90955	-1.5408	0.00241584	0.0264125		>XP_001696091 hypothetical protein CHLREDRAFT_192194, partial [Chlamydomonas reinhardtii].
g9650.t1	128.681	195.895	61.4665	-3.18702	-1.67221	0.00246524	0.0268964		>XP_001695060 predicted protein [Chlamydomonas reinhardtii].
Cre16.g670850.t1.2	74.4864	116.552	32.4211	-3.59494	-1.84597	0.00247355	0.0269682	Ubiquitin carboxyl-terminal hydrolase-related protein	>XP_002950399 hypothetical protein VOLCADRAFT_104654 [Volvox carteri f. nagariensis].
Cre12.g553250.t1.2	242.36	333.209	151.51	-2.19926	-1.13702	0.00252753	0.0273948	phosphofructokinase 5	>XP_001694148 phosphofructokinase family protein [Chlamydomonas reinhardtii].
g11609.t1	1917.8	2907.39	928.203	-3.13228	-1.64721	0.00252732	0.0273948	Integral membrane HPP family protein	>XP_001698747 hypothetical protein CHLREDRAFT_121025, partial [Chlamydomonas reinhardtii].
Cre06.g283400.t1.2	159.445	237.575	81.3156	-2.92164	-1.54678	0.0025323	0.0274181	Sucrose-6F-phosphate phosphohydrolase family protein	>XP_002958588 hypothetical protein VOLCADRAFT_119992 [Volvox carteri f. nagariensis].
g14243.t1	9.58038	15.0287	4.13209	-3.63707	-1.86278	0.00255343	0.0275897	glucosidase 1	>XP_001693563 predicted protein, partial [Chlamydomonas reinhardtii].
Cre03.g200900.t1.3	39.8851	58.1304	21.6397	-2.68629	-1.42561	0.002559	0.0276309		>XP_001693224 hypothetical protein CHLREDRAFT_190596 [Chlamydomonas reinhardtii].
g6313.t1	250.326	357.805	142.847	-2.50481	-1.3247	0.0025647	0.0276733		>XP_001698010 fasciclin-like protein [Chlamydomonas reinhardtii].
g9866.t1	11.101	17.2189	4.98309	-3.45547	-1.78888	0.00256759	0.0276798	Fes1A
Cre08.g374950.t1.3	20.5952	31.4866	9.70383	-3.24476	-1.69811	0.00261304	0.0281176		>XP_001694391 hypothetical protein CHLREDRAFT_173901 [Chlamydomonas reinhardtii].
Cre03.g159900.t1.3	11.2486	18.2701	4.22712	-4.32211	-2.11174	0.00263925	0.0283215	protein serine/threonine kinases;ATP binding;catalytics	>XP_002954071 hypothetical protein VOLCADRAFT_106246 [Volvox carteri f. nagariensis].
g11180.t1	10.6357	18.3888	2.88262	-6.37919	-2.67337	0.002644	0.028334	origin recognition complex 1	>XP_001698364 origin recognition complex subunit 1 [Chlamydomonas reinhardtii].
Cre03.g164750.t1.2	11.2816	17.8129	4.75023	-3.74991	-1.90685	0.00265537	0.0284176		>XP_001703537 predicted protein [Chlamydomonas reinhardtii].
Cre02.g107600.t1.2	9.64864	15.4362	3.86109	-3.99788	-1.99924	0.00268811	0.0287477	glucuronokinase G	>XP_001699734 hypothetical protein CHLREDRAFT_141779 [Chlamydomonas reinhardtii].
Cre01.g030150.t1.2	28.9121	42.2371	15.5871	-2.70974	-1.43815	0.00270683	0.028904	E2F target gene 1	>XP_001690047 predicted protein, partial [Chlamydomonas reinhardtii].
Cre03.g170150.t1.3	24.0818	35.422	12.7416	-2.78004	-1.4751	0.00270825	0.028904	DCD (Development and Cell Death) domain protein	>XP_001703322 hypothetical protein CHLREDRAFT_143969, partial [Chlamydomonas reinhardtii].
Cre17.g714200.t1.3	7.70963	13.997	1.42224	-9.84152	-3.29888	0.00271124	0.0289162	high affinity K+ transporter 5	>XP_001700451 potassium ion uptake transporter, partial [Chlamydomonas reinhardtii].	K+ uptake permease (KUP) family.	2.A.72.3.1
g2940.t1	139.623	191.464	87.7817	-2.18114	-1.12508	0.00272639	0.029058		>XP_001695725 hypothetical protein CHLREDRAFT_184617 [Chlamydomonas reinhardtii].
Cre02.g080400.t1.3	20.5786	31.9002	9.25699	-3.44607	-1.78495	0.00277378	0.0294829		>XP_001701883 predicted protein, partial [Chlamydomonas reinhardtii].
Cre03.g196850.t1.2	55.1571	77.7847	32.5295	-2.3912	-1.25774	0.00278685	0.0296018	transducin family protein / WD-40 repeat family protein	>XP_001693137 predicted protein [Chlamydomonas reinhardtii].
Cre14.g629400.t1.3	5.01217	8.62111	1.40324	-6.14374	-2.61912	0.00281912	0.0298636	P-loop containing nucleoside triphosphate hydrolases superfamily protein	>XP_002958950 hypothetical protein VOLCADRAFT_100282 [Volvox carteri f. nagariensis].
Cre07.g345000.t1.3	17.4903	27.0859	7.89483	-3.43084	-1.77856	0.00282879	0.0299458		>XP_002948956 hypothetical protein VOLCADRAFT_89344 [Volvox carteri f. nagariensis].
g18251.t1	236.951	334.648	139.255	-2.40313	-1.26491	0.00284599	0.0300873	Rubredoxin-like superfamily protein	>XP_001702276 rubredoxin-like protein [Chlamydomonas reinhardtii].
Cre02.g091050.t1.2	207.223	285.257	129.189	-2.20806	-1.14278	0.00286821	0.0302814	Aldolase superfamily protein	>XP_001701779 delta-aminolevulinic acid dehydratase [Chlamydomonas reinhardtii].
Cre03.g176100.t1.2	118.06	164.109	72.011	-2.27895	-1.18837	0.00287988	0.030375		>XP_001703442 hypothetical protein CHLREDRAFT_182801 [Chlamydomonas reinhardtii].
Cre14.g621650.t1.3	646.296	895.279	397.313	-2.25334	-1.17206	0.00288379	0.0303844	catalytics;transferases;[acyl-carrier-protein] S-malonyltransferases;binding	>XP_002949800 hypothetical protein VOLCADRAFT_104457 [Volvox carteri f. nagariensis].
Cre07.g337650.t1.2	99.4547	141.539	57.3702	-2.46712	-1.30283	0.00288978	0.0304067	Thiamin diphosphate-binding fold (THDP-binding) superfamily protein	>XP_002957475 hypothetical protein VOLCADRAFT_68179 [Volvox carteri f. nagariensis].
g7730.t1	38.7414	63.6882	13.7946	-4.6169	-2.20693	0.00290699	0.0305468
Cre06.g279250.t1.2	21.2958	32.3167	10.2749	-3.1452	-1.65315	0.00293105	0.0307378	partner of Y14-MAGO	>XP_001695301 exon junction complex protein [Chlamydomonas reinhardtii].
Cre03.g169400.t1.2	1033.74	1453.23	614.255	-2.36584	-1.24235	0.00294271	0.0308188	UDP-glucuronic acid decarboxylase 1	>XP_001703494 UDP-D-glucuronic acid decarboxylase [Chlamydomonas reinhardtii].
Cre01.g008550.t1.3	17.6821	27.6543	7.70997	-3.58682	-1.84271	0.00294647	0.0308377	Protein kinase superfamily protein	>XP_002955309 hypothetical protein VOLCADRAFT_65761 [Volvox carteri f. nagariensis].
Cre02.g104150.t1.3	22.1808	33.4671	10.8946	-3.07191	-1.61914	0.00296439	0.0309632		>XP_002956938 hypothetical protein VOLCADRAFT_97975 [Volvox carteri f. nagariensis].
g8354.t1	51.7849	74.0321	29.5376	-2.50637	-1.3256	0.0029753	0.0310358	lycopene cyclase	>AAX54906 putative chloroplast lycopene beta cyclase precursor [Chlamydomonas reinhardtii].
Cre02.g104750.t1.3	16.9841	25.4934	8.47484	-3.00813	-1.58887	0.00298952	0.0311633		>XP_001699765 predicted protein [Chlamydomonas reinhardtii].
g4394.t1	49.0121	67.7223	30.302	-2.23491	-1.16022	0.00301928	0.0314526		>XP_001699438 predicted protein [Chlamydomonas reinhardtii].
Cre16.g677150.t1.3	8.17294	13.2114	3.13449	-4.21485	-2.07548	0.003026	0.0314809		>XP_001695954 hypothetical protein CHLREDRAFT_149198 [Chlamydomonas reinhardtii].
Cre03.g155300.t1.1	620.978	872.792	369.164	-2.36424	-1.24138	0.00310219	0.0322094		>XP_001696208 hypothetical protein CHLREDRAFT_187032 [Chlamydomonas reinhardtii].
Cre09.g386200.t1.3	26.1161	38.8611	13.3712	-2.90634	-1.5392	0.00310424	0.0322094		>XP_001695277 predicted protein, partial [Chlamydomonas reinhardtii].
Cre09.g402150.t1.3	5.31632	9.28802	1.34462	-6.90753	-2.78817	0.00313175	0.0324304
Cre09.g391700.t1.2	49.3588	72.4907	26.227	-2.76397	-1.46674	0.0031514	0.0325908		>XP_001694573 predicted protein [Chlamydomonas reinhardtii].
g15736.t1	45.9342	66.8907	24.9777	-2.67802	-1.42117	0.00316787	0.0327179
Cre12.g551800.t1.2	456.917	631.882	281.952	-2.2411	-1.16421	0.00320675	0.0330542		>XP_002948451 hypothetical protein VOLCADRAFT_120630 [Volvox carteri f. nagariensis].
g3648.t1	4.08529	7.26096	0.909617	-7.98243	-2.99683	0.00321189	0.0330854	SHK1 binding protein 1	>XP_002946852 hypothetical protein VOLCADRAFT_56541, partial [Volvox carteri f. nagariensis].
Cre04.g217350.t1.2	3.1038	5.98498	0.222621	-26.8841	-4.74868	0.00324212	0.033353	high affinity K+ transporter 5	>XP_001700451 potassium ion uptake transporter, partial [Chlamydomonas reinhardtii].	K+ uptake permease (KUP) family.	2.A.72.3.1
g6583.t1	8686	11675.2	5696.76	-2.04945	-1.03524	0.00325091	0.0334215	photosystem I light harvesting complex gene 1	>AAD03734 light harvesting complex I protein precursor [Chlamydomonas reinhardtii].	plant photosystem I supercomplex (PSI) family.	5.B.4.1.1
Cre06.g309050.t1.2	86.5465	138.689	34.4043	-4.03114	-2.01119	0.00328143	0.033691	NOT2 / NOT3 / NOT5 family	>XP_001691212 predicted protein [Chlamydomonas reinhardtii].
Cre03.g199100.t1.2	8.48064	13.6422	3.3191	-4.11021	-2.03921	0.00332066	0.0340048		>XP_001693384 predicted protein [Chlamydomonas reinhardtii].
Cre14.g623750.t1.2	13.927	21.4971	6.35683	-3.38174	-1.75776	0.00332366	0.0340133		>XP_002952361 hypothetical protein VOLCADRAFT_93039 [Volvox carteri f. nagariensis].
g18292.t1	2.90485	5.6647	0.145002	-39.0664	-5.28786	0.00334547	0.0341918		>XP_001702230 hypothetical protein CHLREDRAFT_194776 [Chlamydomonas reinhardtii].
Cre17.g715250.t1.2	483.294	664.584	302.005	-2.20057	-1.13788	0.0034355	0.0348665	biotin carboxyl carrier protein 2	>XP_001700442 acetyl-coa biotin carboxyl carrier [Chlamydomonas reinhardtii].
Cre12.g557300.t1.3	16.8785	25.9588	7.7982	-3.32881	-1.73501	0.00342879	0.0348665		>XP_001702852 predicted protein [Chlamydomonas reinhardtii].
Cre09.g400850.t1.3	8.50013	13.7294	3.27085	-4.19751	-2.06953	0.00342772	0.0348665	Leucine-rich repeat (LRR) family protein
Cre17.g729901.t1.3	15.6451	22.8227	8.46754	-2.69532	-1.43046	0.00344213	0.0349067		>XP_001697297 hypothetical protein CHLREDRAFT_151147, partial [Chlamydomonas reinhardtii].
Cre12.g549550.t1.2	3796.88	5198.03	2395.73	-2.16971	-1.1175	0.0034735	0.0351339	tubulin beta chain 2	>XP_001693997 beta tubulin 2 [Chlamydomonas reinhardtii].
Cre09.g403400.t1.1	60.6588	86.4066	34.911	-2.47506	-1.30746	0.00360961	0.0363699	XB3 ortholog 1 in Arabidopsis thaliana	>XP_001695232 predicted protein, partial [Chlamydomonas reinhardtii].
Cre16.g663600.t1.2	488.779	680.381	297.178	-2.28947	-1.19502	0.00365702	0.0368002	phosphate transporter 4;5	>XP_001701490 carbohydrate transporter [Chlamydomonas reinhardtii].	major facilitator superfamily (MFS).	2.A.1.14.22
Cre12.g498500.t1.2	112.816	159.011	66.6199	-2.38685	-1.25511	0.00366312	0.036838	DegP protease 1	>XP_002948032 trypsin family [Volvox carteri f. nagariensis].
Cre06.g286850.t1.1	31.3086	44.777	17.8402	-2.5099	-1.32763	0.00375729	0.0376401	cytidine/deoxycytidylate deaminase family protein	>XP_001695494 predicted protein, partial [Chlamydomonas reinhardtii].
Cre17.g741500.t1.3	44.3344	64.2108	24.4579	-2.62536	-1.39252	0.0037923	0.0379354	ATP binding microtubule motor family protein	>XP_001701115 hypothetical protein CHLREDRAFT_153347, partial [Chlamydomonas reinhardtii].
Cre14.g629500.t1.2	22.2515	32.4484	12.0547	-2.69177	-1.42855	0.00382409	0.0381388		>XP_001692673 predicted protein, partial [Chlamydomonas reinhardtii].
g5069.t1	8.69114	14.0648	3.3175	-4.23957	-2.08392	0.00384741	0.0382982		>XP_001703684 predicted protein, partial [Chlamydomonas reinhardtii].
Cre16.g686750.t1.2	557.667	985.552	129.783	-7.59386	-2.92483	0.00386598	0.0384587	phosphate transporter 1;6	>XP_001691946 proton/phosphate symporter [Chlamydomonas reinhardtii].	major facilitator superfamily (MFS).	2.A.1.9.4
Cre01.g053250.t1.3	62.2785	89.363	35.194	-2.53915	-1.34435	0.00388997	0.0386483	RING/FYVE/PHD zinc finger superfamily protein	>XP_002956822 hypothetical protein VOLCADRAFT_67515 [Volvox carteri f. nagariensis].
Cre04.g223400.t1.2	85.6709	131.807	39.5352	-3.33391	-1.73721	0.00390371	0.0387356		>XP_001692295 hypothetical protein CHLREDRAFT_189433 [Chlamydomonas reinhardtii].
Cre09.g396500.t1.1	29.0421	42.1499	15.9343	-2.64523	-1.40339	0.00390954	0.0387689		>XP_001694501 predicted protein, partial [Chlamydomonas reinhardtii].
Cre17.g706600.t1.2	1151.68	1586.32	717.05	-2.21228	-1.14554	0.00391905	0.0388142		>XP_002951446 hypothetical protein VOLCADRAFT_105095 [Volvox carteri f. nagariensis].
Cre03.g174600.t1.1	13.3512	21.4588	5.2436	-4.09238	-2.03294	0.00394902	0.0390286	breast cancer associated RING 1	>XP_001703284 hypothetical protein CHLREDRAFT_205516 [Chlamydomonas reinhardtii].
Cre16.g654550.t1.2	99.2448	173.654	24.8352	-6.99226	-2.80576	0.00395066	0.0390286	relative of early flowering 6	>XP_001698207 hypothetical protein CHLREDRAFT_193126 [Chlamydomonas reinhardtii].
g11580.t1	520	810.603	229.398	-3.53362	-1.82115	0.00398796	0.0393228	RAP	>XP_001698804 predicted protein of CLR family [Chlamydomonas reinhardtii].
Cre12.g551100.t1.2	172.24	244.626	99.8532	-2.44986	-1.2927	0.00401778	0.0395422		>XP_001694128 predicted protein [Chlamydomonas reinhardtii].
g3728.t1	33.0353	47.989	18.0817	-2.65402	-1.40818	0.00401767	0.0395422		>XP_001703406 hypothetical protein CHLREDRAFT_205593 [Chlamydomonas reinhardtii].
Cre17.g735500.t1.2	148.23	208.405	88.0554	-2.36675	-1.24291	0.00406466	0.0399785		>XP_002947780 hypothetical protein VOLCADRAFT_88009 [Volvox carteri f. nagariensis].
Cre13.g585150.t1.2	183.609	253.125	114.092	-2.21859	-1.14965	0.00407495	0.0400048	Translation initiation factor IF6	>XP_001693606 eukaryotic initiation factor [Chlamydomonas reinhardtii].
g15607.t1	303.716	404.516	202.915	-1.99353	-0.995324	0.00408121	0.0400408		>XP_001699356 hydroxyproline-rich cell wall protein [Chlamydomonas reinhardtii].
Cre09.g408200.t1.2	211.527	300.68	122.374	-2.45706	-1.29694	0.00409469	0.0401229	serine/arginine-rich 22	>XP_001696769 SR protein factor [Chlamydomonas reinhardtii].
Cre07.g319150.t1.2	10.8793	16.8723	4.88621	-3.45304	-1.78787	0.00409449	0.0401229	mRNA capping enzyme family protein	>XP_001700831 hypothetical protein CHLREDRAFT_187495 [Chlamydomonas reinhardtii].
Cre05.g239250.t1.2	21.1026	31.7956	10.4096	-3.05446	-1.61092	0.00413716	0.0404631	Transcription factor jumonji (jmj) family protein / zinc finger (C5HC2 type) family protein	>EFN50838 hypothetical protein CHLNCDRAFT_59419 [Chlorella variabilis].
Cre04.g217200.t1.3	11.7212	18.4798	4.96249	-3.7239	-1.89682	0.00414095	0.0404749		>XP_002951101 hypothetical protein VOLCADRAFT_91563 [Volvox carteri f. nagariensis].
Cre17.g704950.t1.3	7.21609	12.2557	2.17649	-5.63094	-2.49337	0.00421869	0.0410812	myosin heavy chain-related	>XP_001691728 hypothetical protein CHLREDRAFT_170392 [Chlamydomonas reinhardtii].
Cre07.g346100.t1.3	7.27625	11.7753	2.77723	-4.23994	-2.08404	0.00425469	0.0413803	endonuclease V family protein	>XP_001692558 predicted protein, partial [Chlamydomonas reinhardtii].
g15250.t1	106.221	150.625	61.8165	-2.43665	-1.2849	0.00427141	0.0415171	cyclin H;1	>XP_002952397 hypothetical protein VOLCADRAFT_121058 [Volvox carteri f. nagariensis].
Cre15.g641976.t1.2	4.86848	8.41134	1.32562	-6.34523	-2.66567	0.00427823	0.0415576
Cre07.g314150.t1.2	176.579	265.623	87.5356	-3.03446	-1.60144	0.00433216	0.0419257	zeta-carotene desaturase	>XP_001700786 zeta-carotene desaturase [Chlamydomonas reinhardtii].
g18056.t1	1149.54	1580.62	718.462	-2.2	-1.1375	0.00437223	0.0421768	aldehyde dehydrogenase 2C4	>XP_001703585 dual function alcohol dehydrogenase / acetaldehyde dehydrogenase [Chlamydomonas reinhardtii].
g13794.t1	21.0183	30.4152	11.6213	-2.6172	-1.38803	0.00437302	0.0421768	translocon at the outer membrane of chloroplasts 64-III
Cre06.g285650.t1.2	8.70258	14.1257	3.27949	-4.30728	-2.10678	0.00437066	0.0421768	origin recognition complex protein 6	>XP_001695480 origin recognition complex subunit 6 [Chlamydomonas reinhardtii].
Cre14.g631700.t1.3	5.21424	9.32562	1.10287	-8.45578	-3.07994	0.0043731	0.0421768		>XP_002952339 hypothetical protein VOLCADRAFT_105473 [Volvox carteri f. nagariensis].
Cre10.g425900.t1.2	796.515	1200.06	392.969	-3.05383	-1.61062	0.00438976	0.0422744	light-harvesting chlorophyll-protein complex I subunit A4	>XP_001702730 light-harvesting protein of photosystem I [Chlamydomonas reinhardtii].	plant photosystem I supercomplex (PSI) family.	5.B.4.1.1
Cre16.g676400.t1.2	13.6768	21.3746	5.97897	-3.57496	-1.83793	0.00441629	0.0424517	P-loop containing nucleoside triphosphate hydrolases superfamily protein	>XP_001695849 hypothetical protein CHLREDRAFT_118630, partial [Chlamydomonas reinhardtii].	nuclear mRNA exporter (mRNA-E) family.	3.A.18.1.1
Cre02.g144800.t1.3	39.3529	55.9281	22.7777	-2.45539	-1.29595	0.00442102	0.042471	N-acetyl-l-glutamate synthase 2	>XP_001694990 N-acetylglutamate synthase [Chlamydomonas reinhardtii].
Cre03.g151650.t1.1	78.4253	109.529	47.3214	-2.31458	-1.21075	0.00445432	0.0426602	S-adenosyl-L-methionine-dependent methyltransferases superfamily protein	>XP_001695661 hypothetical protein CHLREDRAFT_95324, partial [Chlamydomonas reinhardtii].
g11485.t1	13.2093	20.0528	6.36572	-3.15012	-1.65541	0.00445802	0.0426639
Cre17.g740950.t1.2	18.2518	29.0249	7.47871	-3.88101	-1.95643	0.00446015	0.0426639	Chlorophyll A-B binding family protein	>XP_001701107 high intensity light-inducible lhc-like gene [Chlamydomonas reinhardtii].
Cre15.g637100.t1.2	74.1287	101.227	47.0305	-2.15237	-1.10593	0.00452711	0.0431728	ubiquitin family protein	>XP_002521706 plant ubiquilin, putative [Ricinus communis].
Cre17.g731300.t1.2	46.4657	65.9966	26.9347	-2.45024	-1.29292	0.004519	0.0431728	Uncharacterized protein family (UPF0016)	>XP_001701538 predicted protein [Chlamydomonas reinhardtii].	PF27 family.	9.B.26.2.1
Cre02.g112300.t1.3	52.2708	85.0772	19.4644	-4.37091	-2.12793	0.00453231	0.043196	calpain-type cysteine protease family	>XP_001699685 hypothetical protein CHLREDRAFT_141685, partial [Chlamydomonas reinhardtii].
Cre03.g158550.t1.2	13.3093	20.8535	5.76499	-3.61727	-1.8549	0.00454667	0.0433066	chromatin remodeling factor CHD3 (PICKLE)	>XP_001697511 chromodomain-helicase-DNA-binding protein, partial [Chlamydomonas reinhardtii].
Cre17.g723350.t1.2	10.3824	16.4497	4.3151	-3.81213	-1.9306	0.00460337	0.0436874	sulfate transporter 4;2	>XP_001697222 sulfate transporter [Chlamydomonas reinhardtii].	sulfate permease (SulP) family.	2.A.53.1.8
g1861.t1	61.247	89.7989	32.6951	-2.74656	-1.45763	0.00460919	0.0437162	Cysteine proteinases superfamily protein
Cre05.g247400.t1.2	11.2174	17.8971	4.5376	-3.94418	-1.97973	0.00467528	0.0442042		>XP_001700939 hypothetical protein CHLREDRAFT_167673 [Chlamydomonas reinhardtii].
Cre17.g712850.t1.3	5.23317	8.91811	1.54824	-5.76017	-2.52611	0.00469571	0.0442845	PDI-like 2-3	>XP_001700415 predicted protein [Chlamydomonas reinhardtii].
Cre07.g340050.t1.1	135.141	183.502	86.7794	-2.11458	-1.08037	0.0047074	0.0443525	GTP-binding family protein	>XP_002951809 hypothetical protein VOLCADRAFT_81595 [Volvox carteri f. nagariensis].
Cre03.g190550.t1.2	25.2348	37.1746	13.295	-2.79613	-1.48343	0.00472215	0.0444648	RNA polymerase II transcription mediators	>XP_002950434 hypothetical protein VOLCADRAFT_90807 [Volvox carteri f. nagariensis].
Cre10.g461900.t1.2	35.4139	49.2335	21.5943	-2.27993	-1.18899	0.00480104	0.0450723	NAD(P)-linked oxidoreductase superfamily protein	>XP_001698420 predicted protein [Chlamydomonas reinhardtii].	voltage-gated K+ channel beta-subunit (Kvbeta) family.	8.A.5.1.3
g9624.t1	39.5107	57.7071	21.3142	-2.70744	-1.43693	0.00479664	0.0450723	RNI-like superfamily protein	>XP_001695049 predicted protein [Chlamydomonas reinhardtii].
Cre15.g640350.t1.2	8.96979	14.8535	3.08611	-4.813	-2.26694	0.00479947	0.0450723		>XP_001701154 predicted protein of CLR family [Chlamydomonas reinhardtii].
Cre09.g397200.t1.2	83.626	116.533	50.719	-2.29762	-1.20014	0.00481514	0.0451452	TCP-1/cpn60 chaperonin family protein	>XP_001694510 T-complex protein, zeta subunit [Chlamydomonas reinhardtii].
Cre06.g310800.t1.3	8.73445	15.1474	2.3215	-6.52485	-2.70594	0.00490446	0.0458237
g18120.t1	14.1656	21.1423	7.18883	-2.94099	-1.5563	0.00497082	0.046416		>XP_001703633 predicted protein, partial [Chlamydomonas reinhardtii].
Cre04.g216050.t1.3	22.7029	33.2926	12.1132	-2.74846	-1.45863	0.00499293	0.0465393	Leucine-rich repeat transmembrane protein kinase
Cre06.g262800.t1.2	30.0251	42.8574	17.1928	-2.49276	-1.31774	0.00506623	0.0470947	ARM repeat superfamily protein	>XP_001696307 predicted protein [Chlamydomonas reinhardtii].
Cre14.g630600.t1.3	4.14597	7.50833	0.783622	-9.58157	-3.26026	0.00509095	0.0472283	ubiquitin-specific protease 16	>XP_001692809 predicted protein [Chlamydomonas reinhardtii].
Cre10.g434650.t1.3	56.4348	81.2507	31.6189	-2.56969	-1.36159	0.00511933	0.0474357		>XP_001702650 copper transport accessory protein [Chlamydomonas reinhardtii].	copper transporter (Ctr) family.	1.A.56.3.1
Cre13.g584200.t1.2	11.3752	18.4648	4.28573	-4.30843	-2.10716	0.00512071	0.0474357	Glutaredoxin family protein	>XP_001693602 glutaredoxin/malate transporter fusion protein [Chlamydomonas reinhardtii].
Cre08.g379450.t1.3	5.72328	9.63769	1.80887	-5.32802	-2.4136	0.00513806	0.0475248	glycoside hydrolase family 2 protein	>XP_001694355 hypothetical protein CHLREDRAFT_118013, partial [Chlamydomonas reinhardtii].
Cre06.g269650.t1.2	264.977	413.96	115.993	-3.56882	-1.83545	0.00514348	0.0475468	Carbohydrate-binding-like fold	>XP_001696233 hypothetical protein CHLREDRAFT_182288 [Chlamydomonas reinhardtii].
Cre02.g077400.t1.3	12.2811	18.3693	6.19295	-2.96617	-1.5686	0.00517058	0.0477692		>XP_001701855 predicted protein [Chlamydomonas reinhardtii].
Cre12.g529500.t1.2	56.2872	80.9688	31.6055	-2.56186	-1.35719	0.00527974	0.0486036	FtsJ-like methyltransferase family protein	>XP_002953423 hypothetical protein VOLCADRAFT_63770 [Volvox carteri f. nagariensis].
Cre06.g268937.t1.2	11.2363	18.1181	4.35446	-4.16083	-2.05687	0.00531158	0.048813
Cre06.g272250.t1.1	102.492	139.223	65.7604	-2.11712	-1.0821	0.00531985	0.0488603		>XP_001696208 hypothetical protein CHLREDRAFT_187032 [Chlamydomonas reinhardtii].
Cre08.g374300.t1.3	5.03686	9.11585	0.957867	-9.51682	-3.25048	0.00539019	0.0493343	ARM repeat superfamily protein	>XP_001694283 predicted protein [Chlamydomonas reinhardtii].
Cre03.g173165.t1.3	6.09889	10.3888	1.809	-5.74284	-2.52176	0.00541477	0.0495001	ARM repeat protein interacting with ABF2	>XP_001701338 hypothetical protein CHLREDRAFT_194479 [Chlamydomonas reinhardtii].
Cre08.g385000.t1.2	16.8635	25.9964	7.7307	-3.36275	-1.74964	0.00542019	0.0495208	Leucine-rich repeat protein kinase family protein	>XP_002954376 hypothetical protein VOLCADRAFT_95245 [Volvox carteri f. nagariensis].
Cre17.g715900.t1.2	130.167	175.206	85.128	-2.05814	-1.04134	0.00543109	0.0495627	thymidylate synthase 2	>XP_001700389 predicted protein [Chlamydomonas reinhardtii].
Cre06.g280475.t1.2	31.299	44.768	17.8299	-2.51084	-1.32817	0.00544034	0.0496182		>XP_001695433 predicted protein [Chlamydomonas reinhardtii].
